# Supplementary material for: Catalyst-controlled selective borocarbonylation of benzylidenecyclopropanes: regiodivergent synthesis of γ-vinylboryl ketones and β-cyclopropylboryl ketones
Source: Royal Society of Chemistry journal article supplement (doi:10.1039/d2sc00840h), 2022-01-01

# Catalyst-Controlled Selective Borocarbonylation of Benzylidenecyclopropanes: Regiodivergent Synthesis of $\gamma$ - vinylboryl ketones and $\beta$ -cyclopropylboryl ketones

Fu-Peng Wu and Xiao-Feng Wu\*

<sup>a</sup> Leibniz-Institut für Katalyse e.V., Albert-Einstein-Straße 29a, 18059 Rostock, Germany, E-mail: xiao-feng.wu@catalysis.de

<sup>b</sup> Dalian National Laboratory for Clean Energy, Dalian Institute of Chemical Physics, Chinese Academy of Sciences, 116023, Dalian, Liaoning, China, E-mail: xwu2020@dicp.ac.cn

## Table of Contents

|                                                                                                     |      |
|-----------------------------------------------------------------------------------------------------|------|
| 1. General information.....                                                                         | S2   |
| 2. Optimization of borocarbonylation.....                                                           | S3   |
| 3. General procedure of borocarbonylation .....                                                     | S7   |
| 4. General procedure for preparing BCPs .....                                                       | S9   |
| 5. Spectroscopic data of products.....                                                              | S13  |
| 6. Derivatization of $\gamma$ -vinylboryl ketone 3a and $\beta$ -cyclopropylboryl ketone 4a.....    | S51  |
| 7. References.....                                                                                  | S55  |
| 8. NMR Spectra of the $\gamma$ -vinylboryl ketones, $\beta$ -cyclopropylboryl ketones and BCPs..... | S56  |
| 9. Crystallographic reports for the x-ray structures.....                                           | S225 |

## 1. General information

### Reagents, solvents, and analytical methods:

Unless otherwise noted, all reactions were carried out under a carbon monoxide or nitrogen atmosphere. The benzyldenecyclopropanes were synthesized according to existing method, and reagents were ordered from Sigma-Aldrich, TCI, ABCR, and Acros, and used without purification. All solvents were dried by standard techniques and distilled prior to use. Column chromatography was performed on silica gel (200-300 meshes) using *N*-pentane (bp. 36.1 °C), dichloromethane and ethyl acetate as eluent. All NMR spectra were recorded at ambient temperature using Bruker Avance III HD 300 NMR ( $^1\text{H}$ , 300 MHz;  $^{13}\text{C}\{^1\text{H}\}$ , 75 MHz;  $^{11}\text{B}$ , 96 MHz,  $^{19}\text{F}$ , 282 MHz), Bruker ARX 400 NMR spectrometers ( $^1\text{H}$ , 400 MHz;  $^{13}\text{C}\{^1\text{H}\}$ , 101 MHz,  $^{11}\text{B}$ , 128 MHz,  $^{19}\text{F}$  376 MHz).  $^1\text{H}$  NMR chemical shifts are reported relative to TMS and were referenced via residual proton resonances of the corresponding deuterated solvent ( $\text{CDCl}_3$ : 7.26 ppm) whereas  $^{13}\text{C}\{^1\text{H}\}$  NMR spectra are reported relative to TMS via the carbon signals of the deuterated solvent ( $\text{CDCl}_3$ : 77.0 ppm). Data for  $^1\text{H}$  are reported as follows: chemical shift ( $\delta$  ppm), multiplicity (s = singlet, d = doublet, t = triplet, q = quartet, quint = quintet, m = multiplet, br = broad), coupling constant (Hz), and integration. All  $^{13}\text{C}$  NMR spectra were broad-band  $^1\text{H}$  decoupled. However, signals for the carbon attach to boron, C(alkyl)-B or C(vinyl)-B, are usually too broad to observe in the  $^{13}\text{C}\{^1\text{H}\}$  NMR spectra. High resolution mass spectra (HRMS) were recorded on an Agilent 6210 system. Gas chromatography (GC) analyses were performed on an Agilent HP-7890A instrument with an FID detector and HP-5 capillary column (polydimethylsiloxane with 5% phenyl groups, 30 m, 0.32 mm i.d. 0.25  $\mu\text{m}$  film thickness) using argon as carrier gas.

Because of the high toxicity of carbon monoxide, all the reactions should be performed in an autoclave. The laboratory should be well-equipped with a CO detector and alarm system.

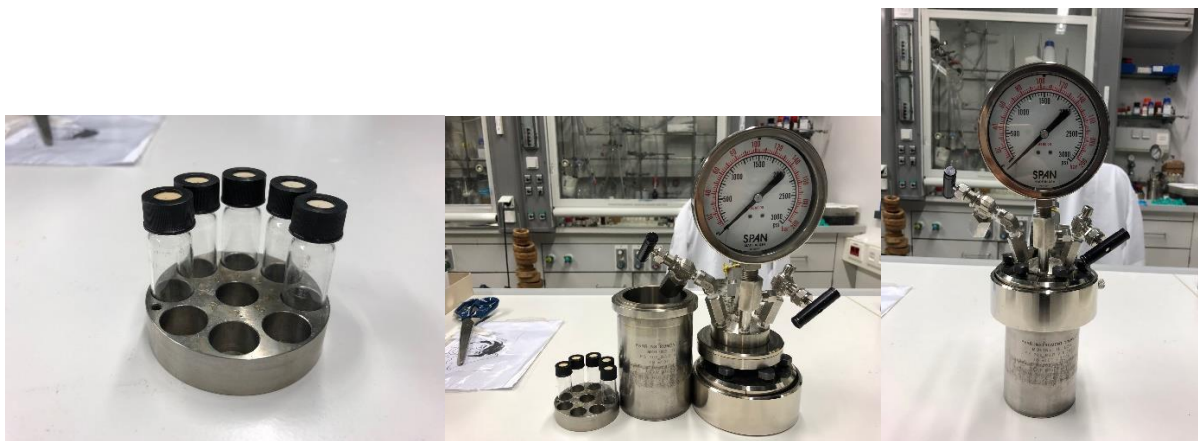

## 2. Optimization of borocarbonylation

### 2.1 Optimization of ligand for $\gamma$ -vinylboryl ketones **3a**.

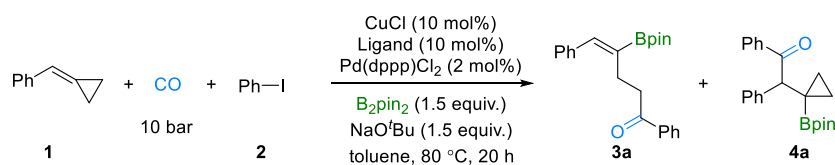

| Entry | Ligand                           | <b>3a</b> (%) | <b>4a</b> (%) | r.r. ( <b>3a:4a</b> ) |
|-------|----------------------------------|---------------|---------------|-----------------------|
| 1     | None                             | 0             | 0             | -                     |
| 2     | DPPBz ( <b>L1</b> )              | 0             | 0             | -                     |
| 3     | DPPE ( <b>L2</b> )               | 0             | 0             | -                     |
| 4     | DPPP ( <b>L3</b> )               | 22            | 22            | 1:1                   |
| 5     | DPPB ( <b>L4</b> )               | 4             | 2             | 2:1                   |
| 6     | DPPF ( <b>L5</b> )               | 19            | 10            | 2:1                   |
| 7     | DPEphos ( <b>L6</b> )            | 39            | 18            | 2:1                   |
| 8     | PPh <sub>3</sub> ( <b>L7</b> )   | 0             | 5             | -                     |
| 9     | BuPAd <sub>2</sub> ( <b>L8</b> ) | 64            | 0             | >20:1                 |
| 10    | IPr ( <b>L9</b> )                | 81            | 2             | >20:1                 |
| 11    | IMes ( <b>L10</b> )              | 0             | 0             | -                     |

### 2.2 Optimization of palladium source for $\gamma$ -vinylboryl ketones **3a**.

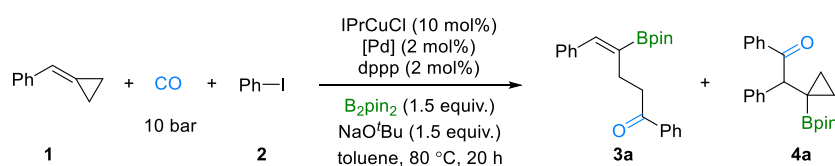

| Entry | [Pd]                                                                    | <b>3a</b> (%) | <b>4a</b> (%) | r.r. ( <b>3a:4a</b> ) |
|-------|-------------------------------------------------------------------------|---------------|---------------|-----------------------|
| 1     | Pd(OAc) <sub>2</sub>                                                    | 80            | 5             | 16:1                  |
| 2     | Pd(TFA) <sub>2</sub>                                                    | 79            | 5             | 20:1                  |
| 3     | PdCl <sub>2</sub>                                                       | 58            | 0             | >20:1                 |
| 4     | PdI <sub>2</sub>                                                        | 58            | 0             | >20:1                 |
| 5     | [Pd( $\eta^3$ -cinnamyl)Cl] <sub>2</sub> (1 mol%)                       | 64            | 0             | >20:1                 |
| 6     | [Pd( $\eta^3$ -C <sub>3</sub> H <sub>5</sub> )Cl] <sub>2</sub> (1 mol%) | 77            | 5             | 15:1                  |

### 2.3 Optimization of temperature for $\gamma$ -vinylboryl ketones **3a**.

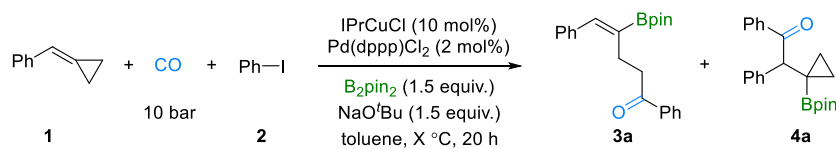

| Entry | temperature | <b>3a</b> (%) | <b>4a</b> (%) | r.r. ( <b>3a</b> : <b>4a</b> ) |
|-------|-------------|---------------|---------------|--------------------------------|
| 1     | 90 °C       | 63            | 5             | 12:1                           |
| 2     | 80 °C       | 81            | 2             | >20:1                          |
| 3     | 70 °C       | 62            | 2             | >20:1                          |
| 4     | 60 °C       | 47            | 11            | 4:1                            |

### 2.4 Optimization of the loading of B<sub>2</sub>pin<sub>2</sub>, NaO<sup>t</sup>Bu and PhI for $\gamma$ -vinylboryl ketones **3a**.

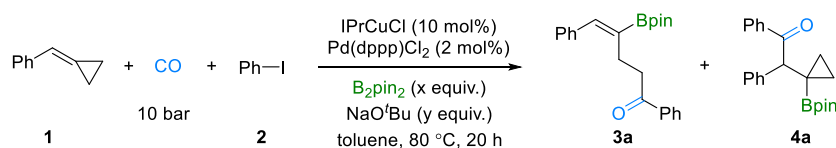

| Entry | B <sub>2</sub> pin <sub>2</sub> | NaO <sup>t</sup> Bu | PhI | <b>3a</b> (%) | <b>4a</b> (%) | r.r. ( <b>3a</b> : <b>4a</b> ) |
|-------|---------------------------------|---------------------|-----|---------------|---------------|--------------------------------|
| 1     | 1.2                             | 1.5                 | 1.5 | 73            | 5             | 15:1                           |
| 2     | 1.7                             | 1.5                 | 1.5 | 74            | 3             | >20:1                          |
| 3     | 2.0                             | 1.5                 | 1.5 | 75            | 3             | >20:1                          |
| 4     | 1.5                             | 1.2                 | 1.5 | 50            | 5             | 10:1                           |
| 5     | 1.5                             | 1.7                 | 1.5 | 82            | 3             | >20:1                          |
| 6     | 1.5                             | 2.0                 | 1.5 | 75            | 1             | >20:1                          |
| 7     | 1.5                             | 1.5                 | 1.2 | 72            | 2             | >20:1                          |
| 8     | 1.5                             | 1.5                 | 1.5 | 81            | 2             | >20:1                          |
| 9     | 1.5                             | 1.5                 | 1.7 | 85            | 2             | >20:1                          |
| 10    | 1.5                             | 1.5                 | 2.0 | 76            | 5             | 13:1                           |



## 2.5 Optimization of ligand for $\beta$ -cyclopropylboryl ketone **4a**.

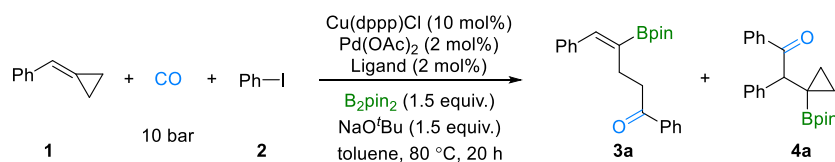

| Entry | Ligand                           | <b>3a</b> (%) | <b>4a</b> (%) | r.r. ( <b>3a:4a</b> ) |
|-------|----------------------------------|---------------|---------------|-----------------------|
| 1     | None                             | 2             | 25            | 1:13                  |
| 2     | DPEphos ( <b>L6</b> )            | 5             | 35            | 1:7                   |
| 3     | PPh <sub>3</sub> ( <b>L7</b> )   | 4             | 31            | 1:8                   |
| 4     | BuPAD <sub>2</sub> ( <b>L8</b> ) | 29            | 2             | 10:1                  |
| 5     | IPr·HCl ( <b>L9</b> )            | 44            | 23            | 2:1                   |
| 6     | Xantphos ( <b>L11</b> )          | 7             | 50            | 1:7                   |
| 7     | Nixantphos ( <b>L12</b> )        | 4             | 26            | 1:7                   |
| 8     | Sixantphos ( <b>L13</b> )        | 4             | 33            | 1:8                   |
| 9     | BINAP ( <b>L14</b> )             | 10            | 36            | 1:4                   |
| 10    | <b>L15</b>                       | 3             | 31            | 1:10                  |
| 11    | <b>L16</b>                       | 4             | 26            | 1:7                   |
| 12    | <b>L17</b>                       | 2             | 17            | 1:9                   |
| 13    | <b>L18</b>                       | 3             | 21            | 1:7                   |
| 14    | <b>L19</b>                       | 4             | 26            | 1:7                   |
| 15    | <b>L20</b>                       | 4             | 37            | 1:9                   |
| 16    | <b>L21</b>                       | 4             | 21            | 1:5                   |
| 17    | <b>L22</b>                       | 3             | 21            | 1:7                   |
| 18    | <b>L23</b>                       | 3             | 36            | 1:12                  |
| 19    | <b>L24</b>                       | 4             | 38            | 1:10                  |
| 20    | <b>L25</b>                       | 2             | 29            | 1:15                  |
| 21    | (S,S)-Ph-BPE ( <b>L26</b> )      | 2             | 0             | -                     |

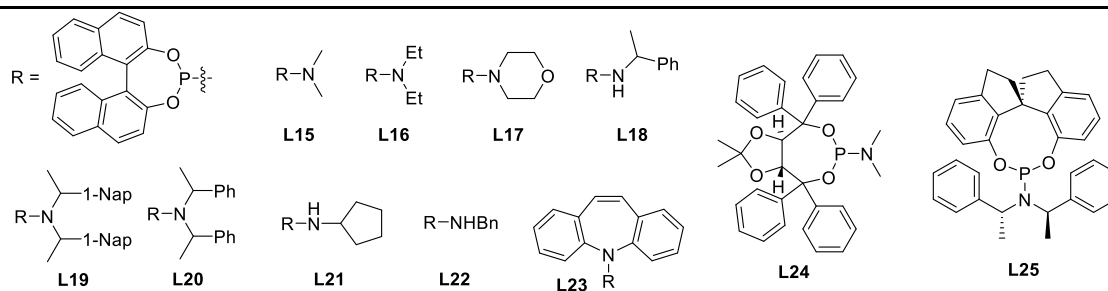

## 2.6 Optimization of palladium source for $\beta$ -cyclopropylboryl ketone **4a**.

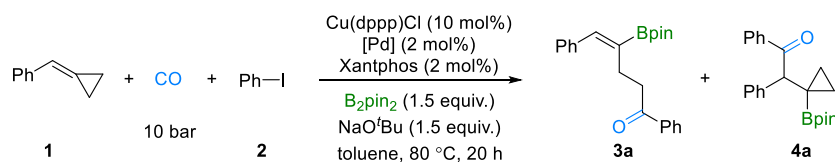

| Entry    | [Pd]                                                                    | <b>3a</b> (%) | <b>4a</b> (%) | r.r. ( <b>3a:4a</b> ) |
|----------|-------------------------------------------------------------------------|---------------|---------------|-----------------------|
| 1        | Pd(OAc) <sub>2</sub>                                                    | 7             | 50            | 1:8                   |
| 2        | Pd(TFA) <sub>2</sub>                                                    | 7             | 57            | 1:8                   |
| 3        | PdCl <sub>2</sub>                                                       | 8             | 29            | 1:4                   |
| <b>4</b> | <b>[Pd(cinnamyl)Cl]<sub>2</sub> (1 mol%)</b>                            | <b>7</b>      | <b>61</b>     | <b>1:9</b>            |
| 5        | [Pd( $\eta^3$ -C <sub>3</sub> H <sub>5</sub> )Cl] <sub>2</sub> (1 mol%) | 6             | 54            | 1:9                   |

## 2.7 Optimization of CO pressure.

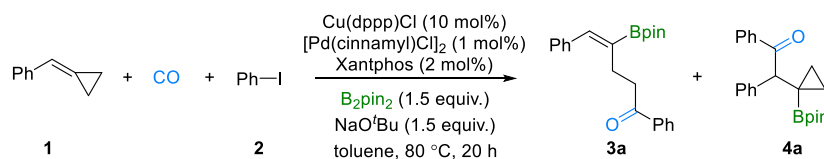

| Entry    | CO (bar) | <b>3a</b> (%) | <b>4a</b> (%) | r.r. ( <b>3a:4a</b> ) |
|----------|----------|---------------|---------------|-----------------------|
| 1        | 20       | 7             | 55            | 1:8                   |
| 2        | 10       | 7             | 61            | 1:9                   |
| 3        | 6        | 9             | 64            | 1:7                   |
| <b>4</b> | <b>3</b> | <b>4</b>      | <b>76</b>     | <b>1:19</b>           |
| 5        | 1        | 5             | 73            | 1:15                  |

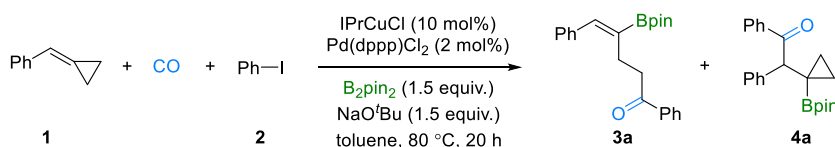

| Entry | CO (bar) | <b>3a</b> (%) | <b>4a</b> (%) | r.r. ( <b>3a:4a</b> ) |
|-------|----------|---------------|---------------|-----------------------|
| 1     | 20       | 84            | 2             | >20:1                 |
| 2     | 10       | 85            | 2             | >20:1                 |
| 3     | 6        | 91            | 7             | 13:1                  |
| 4     | 3        | 91            | 9             | 10:1                  |
| 5     | 1        | 70            | 9             | 8:1                   |

### 3. General procedure of borocarbonylation

#### 3.1 general borocarbonylation I (ring-opening).

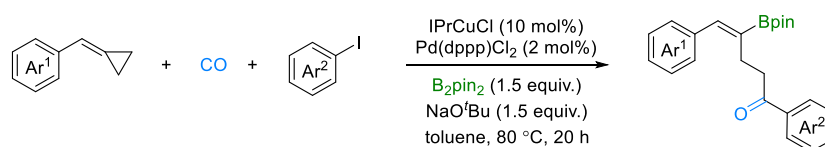

A 4 mL screw-cap vial was charged with IPrCuCl (9.7 mg, 10 mol%), Pd(dppp)Cl<sub>2</sub> (2.4 mg, 2 mol%), B<sub>2</sub>pin<sub>2</sub> (76.2 mg, 1.5 equiv.), NaO<sup>t</sup>Bu (28.8 mg, 1.5 equiv.) and an oven-dried stir bar. The vial was closed with a Teflon septum and cap and connected to the atmosphere via a needle. After toluene (1.0 mL), aryl iodides (1.7 equiv.) and BCP (0.2 mmol) were added with a syringe under argon atmosphere, the vial was moved to an alloy plate and put into a Parr 4560 series autoclave (300 mL) under argon atmosphere. At room temperature, the autoclave was flushed with CO three times and charged with 10 bar CO. The autoclave was placed on a heating plate equipped with a magnetic stirrer and an aluminum block. The reaction mixture was heated to 80 °C for 20 h. The reaction was then quenched upon addition of water (10 mL) and the mixture was extracted with EA (10 mL). The combined organic was dried using Na<sub>2</sub>SO<sub>4</sub> and then concentrated in vacuo. The crude product was purified by column chromatography on silica gel to afford the corresponding product.

#### 3.2 general borocarbonylation II (ring-remaining).

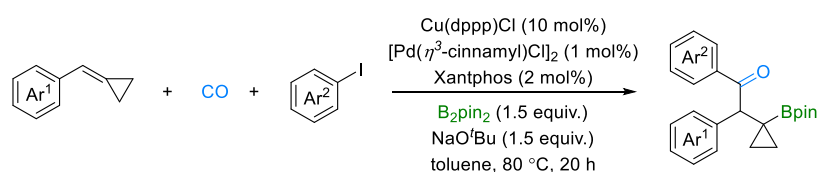

A 4 mL screw-cap vial was charged with Cu(dppp)Cl (10.2 mg, 10 mol%), [Pd( $\eta^3$ -cinnamyl)Cl]<sub>2</sub> (1.0 mg, 1 mol%), Xantphos (2.3 mg, 2 mol%), B<sub>2</sub>pin<sub>2</sub> (76.2 mg, 1.5 equiv.), NaO<sup>t</sup>Bu (28.8 mg, 1.5 equiv.) and an oven-dried stir bar. The vial was closed with a Teflon septum and cap and connected to the atmosphere via a needle. After toluene (1.0 mL), aryl iodides (1.5 equiv.) and BCP (0.2 mmol) were added with a syringe under argon atmosphere, the vial was moved to an alloy plate and put into a Parr 4560 series autoclave (300 mL) under argon atmosphere. At room temperature, the autoclave was flushed with CO three times and charged with 10 bar CO. The autoclave was placed on a heating plate equipped with a magnetic stirrer and an aluminum block. The reaction mixture was heated to 80 °C for 20 h. The reaction was then quenched upon addition of water (10 mL) and the mixture was extracted with EA (10 mL). The combined organic was dried using Na<sub>2</sub>SO<sub>4</sub> and then concentrated in vacuo. The crude product was purified by column chromatography on silica gel to afford the corresponding product.

### 3.3 general borocarbonylation III (ring- remaining).

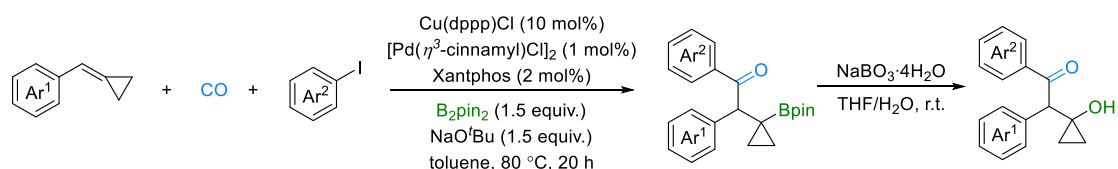

A 4 mL screw-cap vial was charged with Cu(dppp)Cl (10.2 mg, 10 mol%), [Pd( $\eta^3$ -cinnamyl)Cl]<sub>2</sub> (1.0 mg, 1 mol%), Xantphos (2.3 mg, 2 mol%), B<sub>2</sub>pin<sub>2</sub> (76.2 mg, 1.5 equiv.), NaO<sup>t</sup>Bu (28.8 mg, 1.5 equiv.) and an oven-dried stir bar. The vial was closed with a Teflon septum and cap and connected to the atmosphere via a needle. After toluene (1.0 mL), aryl iodides (1.5 equiv.) and BCP (0.2 mmol) were added with a syringe under argon atmosphere, the vial was moved to an alloy plate and put into a Parr 4560 series autoclave (300 mL) under argon atmosphere. At room temperature, the autoclave was flushed with CO three times and charged with 10 bar CO. The autoclave was placed on a heating plate equipped with a magnetic stirrer and an aluminum block. The reaction mixture was heated to 80 °C for 20 h. The reaction was then quenched upon addition of water (10 mL) and the mixture was extracted with EA (10 mL) and then concentrated in vacuo. The crude product in THF (2 mL) and water (2 mL) was added NaBO<sub>3</sub>·4H<sub>2</sub>O (153.0 mg, 5 equiv). The reaction mixture was stirred vigorously at room temperature and determined by TLC analysis (2 h – 12 h). The reaction mixture was quenched with water and then extracted with ethyl acetate (5 mL). The combined organic layers were washed with brine (15 mL), dried over Na<sub>2</sub>SO<sub>4</sub> and concentrated. The crude product was purified by column chromatography on silica gel to afford the corresponding product.

## 4. General procedure for preparing BCPs

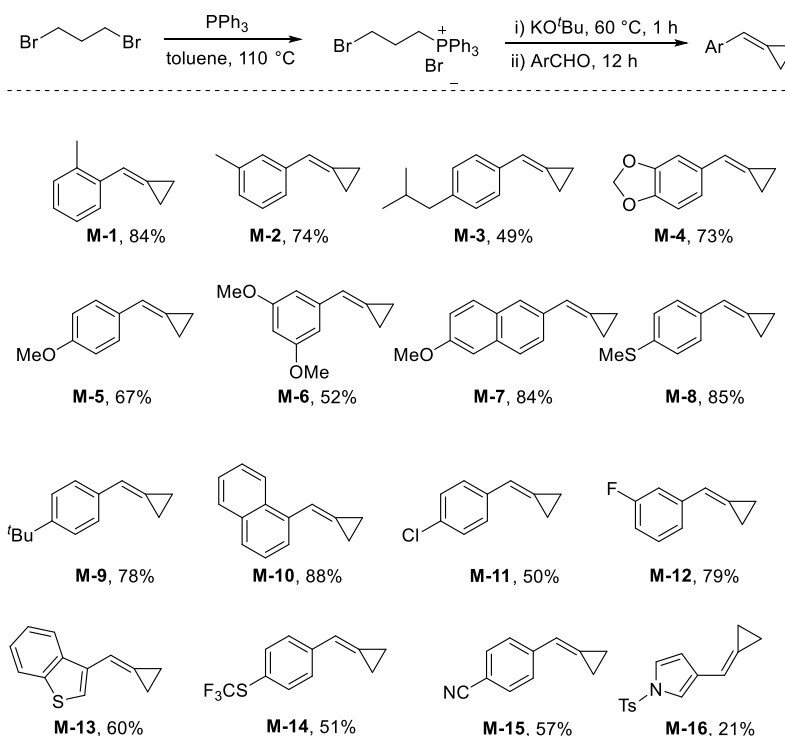

**Representative Procedure<sup>1</sup>:** To a 500 mL round bottom flask, 1,3-dibromopropane (41.6 g, 200 mmol), triphenylphosphine (52.5 g, 200 mmol) and toluene (100 mL) were added. The mixture was heated at 110 °C and maintained with stirring for 16 h. The white precipitate was filtered and washed with additional 50 mL of toluene and dried overnight in a vacuum stove, yielding 3-bromopropyltriphenylphosphonium bromide quantitatively. A flame-dried scintillation vial equipped with a stir bar was charged with (3-bromopropyl)triphenylphosphonium bromide (1.40 g, 3.0 mmol, 1.2 equiv) and KO<sup>t</sup>Bu (700 mg, 6.0 mmol, 2.4 equiv). The solids were suspended in THF (10 mL), and the mixture was allowed to stir at 60 °C for 1 h. After the solution had cooled to room temperature, benzaldehyde (265 mg, 2.5 mmol, 1.0 equiv) was added to the suspension dropwise over 2 min. The vial was sealed, and the suspension was allowed to stir at 60 °C for 12 h. The reaction mixture was cooled to room temperature and filtered through a celite pad, which was subsequently rinsed with Et<sub>2</sub>O (3 × 20 mL). The filtrate was concentrated, and the resulting crude mixture was purified by flash chromatography (*n*-pentane) to provide BCP substrate **1a** (195 mg, 60% yield) as a colorless oil.

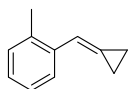

### 1-(Cyclopropylidene)methyl-2-methylbenzene (M-1)

<sup>1</sup>H NMR (300 MHz, CDCl<sub>3</sub>) δ 7.75 (ddd, *J* = 7.4, 1.3, 0.6 Hz, 1H), 7.24 – 7.09 (m, 3H), 6.98 (p, *J* = 2.1 Hz, 1H), 2.41 (s, 3H), 1.46 – 1.39 (m, 2H), 1.23 – 1.17 (m, 2H).

<sup>13</sup>C NMR (75 MHz, CDCl<sub>3</sub>) δ 136.6, 134.9, 130.3, 126.6, 125.9, 125.8, 125.0, 115.5, 19.7, 4.1, 0.8.

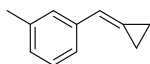

**1-(Cyclopropylidenemethyl)-3-methylbenzene (M-2)**

$^1\text{H NMR}$  (300 MHz,  $\text{CDCl}_3$ )  $\delta$  7.34 – 7.27 (m, 2H), 7.21 – 7.13 (m, 1H), 7.02 – 6.95 (m, 1H), 6.68 (p,  $J = 2.1$  Hz, 1H), 2.32 (s, 3H), 1.42 – 1.34 (m, 2H), 1.15 – 1.09 (m, 2H).

$^{13}\text{C NMR}$  (75 MHz,  $\text{CDCl}_3$ )  $\delta$  138.2, 137.9, 128.3, 127.5, 127.3, 124.0, 123.7, 118.3, 21.5, 4.2, 0.5.

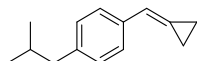

**1-(Cyclopropylidenemethyl)-4-isobutylbenzene (M-3)**

$^1\text{H NMR}$  (300 MHz,  $\text{CDCl}_3$ )  $\delta$  7.47 – 7.43 (m, 2H), 7.13 – 7.09 (m, 2H), 6.73 (q,  $J = 2.0$  Hz, 1H), 2.47 (d,  $J = 7.2$  Hz, 2H), 1.94 – 1.80 (m, 1H), 1.46 – 1.38 (m, 2H), 1.20 – 1.13 (m, 2H), 0.92 (s, 3H), 0.90 (s, 3H).

$^{13}\text{C NMR}$  (75 MHz,  $\text{CDCl}_3$ )  $\delta$  140.3, 135.7, 129.2, 126.3, 123.1, 118.1, 45.2, 30.2, 22.4, 4.1, 0.5.

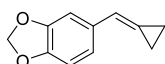

**5-(Cyclopropylidenemethyl)benzo[*d*][1,3]dioxole (M-4)**

$^1\text{H NMR}$  (400 MHz,  $\text{CDCl}_3$ )  $\delta$  7.04 (d,  $J = 1.7$  Hz, 1H), 6.80 (dd,  $J = 7.8, 1.5$  Hz, 1H), 6.66 (d,  $J = 8.4$  Hz, 1H), 6.56 (q,  $J = 2.1$  Hz, 1H), 5.82 (s, 2H), 1.27 (ddd,  $J = 9.4, 5.3, 2.2$  Hz, 2H), 1.07 – 1.02 (m, 2H).

$^{13}\text{C NMR}$  (101 MHz,  $\text{CDCl}_3$ )  $\delta$  147.8, 146.4, 132.8, 122.1, 120.8, 117.8, 108.1, 106.1, 100.8, 4.0, 0.4.

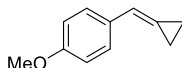

**1-(Cyclopropylidenemethyl)-4-methoxybenzene (M-5)**

$^1\text{H NMR}$  (300 MHz,  $\text{CDCl}_3$ )  $\delta$  7.55 – 7.45 (m, 2H), 6.95 – 6.86 (m, 2H), 6.72 (t,  $J = 2.1$  Hz, 1H), 3.83 (s, 3H), 1.45 – 1.36 (m, 2H), 1.23 – 1.13 (m, 2H).

$^{13}\text{C NMR}$  (75 MHz,  $\text{CDCl}_3$ )  $\delta$  158.5, 131.2, 127.6, 121.6, 117.5, 113.9, 55.2, 4.0, 0.4.

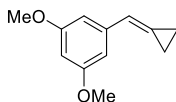

**1-(Cyclopropylidenemethyl)-3,5-dimethoxybenzene (M-6)**

$^1\text{H NMR}$  (400 MHz,  $\text{CDCl}_3$ )  $\delta$  6.70 (dd,  $J = 13.0, 2.1$  Hz, 3H), 6.37 (t,  $J = 2.3$  Hz, 1H), 3.81 (s, 6H), 1.45 – 1.41 (m, 2H), 1.19 (ddd,  $J = 10.3, 5.9, 2.1$  Hz, 2H).

$^{13}\text{C NMR}$  (101 MHz,  $\text{CDCl}_3$ )  $\delta$  160.8, 140.2, 125.0, 118.2, 104.7, 98.9, 55.2, 26.9, 4.2, 0.6.

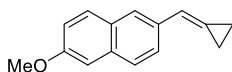

**2-(Cyclopropylidenemethyl)-6-methoxynaphthalene (M-7)**

$^1\text{H NMR}$  (400 MHz,  $\text{CDCl}_3$ )  $\delta$  7.84 – 7.75 (m, 2H), 7.75 – 7.66 (m, 2H), 7.18 – 7.09 (m, 2H), 6.89 (p,  $J = 2.1$  Hz, 1H), 3.92 (s, 3H), 1.50 (ddd,  $J = 9.5, 5.6, 2.3$  Hz, 2H), 1.24 – 1.20 (m, 2H).

$^{13}\text{C NMR}$  (101 MHz,  $\text{CDCl}_3$ )  $\delta$  157.4, 133.8, 133.6, 129.4, 129.1, 126.8, 125.6, 125.0, 123.7, 118.8, 118.4, 105.8, 55.3, 4.3, 0.6.

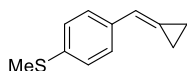

**(4-(Cyclopropylidenemethyl)phenyl)(methyl)sulfane (M-8)**

$^1\text{H NMR}$  (400 MHz,  $\text{CDCl}_3$ )  $\delta$  7.48 – 7.44 (m, 2H), 7.25 – 7.21 (m, 2H), 6.71 (p,  $J = 2.1$  Hz, 1H), 2.49 (s, 3H), 1.44 – 1.39 (m, 2H), 1.18 (ddd,  $J = 10.1, 5.7, 2.1$  Hz, 2H).

$^{13}\text{C NMR}$  (101 MHz,  $\text{CDCl}_3$ )  $\delta$  136.4, 135.4, 127.0, 126.8, 123.8, 117.6, 16.0, 4.1, 0.5.

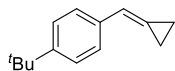

**1-(*tert*-Butyl)-4-(cyclopropylidenemethyl)benzene (M-9)**

$^1\text{H NMR}$  (300 MHz,  $\text{CDCl}_3$ )  $\delta$  7.45 – 7.39 (m, 2H), 7.34 – 7.28 (m, 2H), 6.72 – 6.64 (m, 1H), 1.34 (dd,  $J = 14.4, 2.2$  Hz, 2H), 1.27 (s, 9H), 1.12 – 1.07 (m, 2H).

$^{13}\text{C NMR}$  (75 MHz,  $\text{CDCl}_3$ )  $\delta$  149.6, 135.5, 126.3, 125.3, 123.3, 117.9, 34.5, 31.3, 4.1, 0.5.

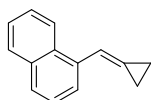

**1-(Cyclopropylidenemethyl)naphthalene (M-10)**

$^1\text{H NMR}$  (300 MHz,  $\text{CDCl}_3$ )  $\delta$  8.25 (dd,  $J = 8.9, 1.1$  Hz, 1H), 7.93 – 7.84 (m, 2H), 7.76 (d,  $J = 8.2$  Hz, 1H), 7.60 – 7.45 (m, 4H), 1.52 – 1.44 (m, 2H), 1.35 – 1.27 (m, 2H).

$^{13}\text{C NMR}$  (75 MHz,  $\text{CDCl}_3$ )  $\delta$  134.6, 133.8, 131.0, 128.6, 127.1, 126.7, 125.8, 125.6, 125.5, 123.8, 123.6, 114.7, 4.1, 1.5.

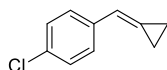

**1-Chloro-4-(cyclopropylidenemethyl)benzene (M-11)**

$^1\text{H NMR}$  (300 MHz,  $\text{CDCl}_3$ )  $\delta$  7.49 – 7.42 (m, 2H), 7.35 – 7.24 (m, 2H), 6.71 (p,  $J = 2.1$  Hz, 1H), 1.45 – 1.38 (m, 2H), 1.22 – 1.15 (m, 2H).

$^{13}\text{C NMR}$  (75 MHz,  $\text{CDCl}_3$ )  $\delta$  136.7, 132.2, 128.6, 127.7, 125.2, 117.2, 4.1, 0.6.

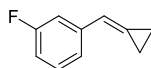

**1-(Cyclopropylidenemethyl)-3-fluorobenzene (M-12)**

$^1\text{H NMR}$  (300 MHz,  $\text{CDCl}_3$ )  $\delta$  7.27 – 7.19 (m, 3H), 6.94 – 6.81 (m, 1H), 6.70 (p,  $J = 1.2$  Hz, 1H), 1.45 – 1.37 (m, 2H), 1.21 – 1.14 (m, 2H).

$^{13}\text{C NMR}$  (75 MHz,  $\text{CDCl}_3$ )  $\delta$  163.1 (d,  $J = 244.4$  Hz), 140.6 (d,  $J = 7.7$  Hz), 129.8 (d,  $J = 8.6$  Hz), 126.0, 122.5 (d,  $J = 2.5$  Hz), 117.4 (d,  $J = 2.8$  Hz), 113.4 (d,  $J = 21.6$  Hz), 112.8 (d,  $J = 21.8$  Hz), 4.2, 0.6.

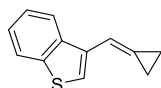

**3-(Cyclopropylidenemethyl)benzo[b]thiophene (M-13)**

$^1\text{H NMR}$  (400 MHz,  $\text{CDCl}_3$ )  $\delta$  7.97 – 7.94 (m, 1H), 7.84 (ddd,  $J = 7.8, 1.3, 0.7$  Hz, 1H), 7.51 (s, 1H), 7.40 – 7.30 (m, 2H), 7.06 (q,  $J = 2.0$  Hz, 1H), 1.40 – 1.35 (m, 2H), 1.26 (ddd,  $J = 8.7, 4.9, 1.5$  Hz, 2H).

$^{13}\text{C}$  NMR (101 MHz,  $\text{CDCl}_3$ )  $\delta$  140.1, 137.9, 134.0, 125.2, 124.2, 124.0, 122.7, 121.7, 120.8, 110.5, 4.2, 2.0.

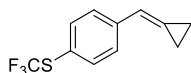

**(4-(Cyclopropylidenemethyl)phenyl)(trifluoromethyl)sulfane (M-14)**

$^1\text{H}$  NMR (400 MHz,  $\text{CDCl}_3$ )  $\delta$  7.59 (q,  $J = 8.4$  Hz, 4H), 6.77 (p,  $J = 2.0$  Hz, 1H), 1.50 – 1.40 (m, 2H), 1.23 (ddd,  $J = 9.8, 5.7, 1.5$  Hz, 2H).

$^{13}\text{C}$  NMR (101 MHz,  $\text{CDCl}_3$ )  $\delta$  140.9, 136.5, 129.6 (q,  $J = 308.3$  Hz), 127.8, 127.4, 121.8 (q,  $J = 2.2$  Hz), 117.3, 4.3, 0.7.

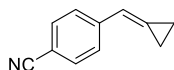

**4-(Cyclopropylidenemethyl)benzonitrile (M-15)**

$^1\text{H}$  NMR (300 MHz,  $\text{CDCl}_3$ )  $\delta$  7.58 (s, 4H), 6.77 (p,  $J = 1.9$  Hz, 1H), 1.51 – 1.42 (m, 2H), 1.29 – 1.19 (m, 2H).

$^{13}\text{C}$  NMR (75 MHz,  $\text{CDCl}_3$ )  $\delta$  142.6, 132.2, 129.7, 126.9, 119.2, 117.2, 109.7, 4.4, 0.8.

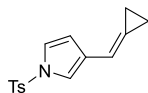

**3-(Cyclopropylidenemethyl)-1-tosyl-1H-pyrrole (M-16)**

$^1\text{H}$  NMR (300 MHz,  $\text{CDCl}_3$ )  $\delta$  7.62 – 7.55 (m, 2H), 7.20 – 7.13 (m, 3H), 7.07 (dd,  $J = 2.4, 1.8$  Hz, 1H), 6.37 (ddq,  $J = 3.5, 1.7, 0.6$  Hz, 1H), 6.15 (td,  $J = 3.3, 0.7$  Hz, 1H), 2.27 (s, 3H), 1.12 – 1.04 (m, 4H).

$^{13}\text{C}$  NMR (75 MHz,  $\text{CDCl}_3$ )  $\delta$  144.8, 136.3, 133.6, 129.9, 126.8, 125.5, 122.0, 112.3, 111.3, 107.5, 21.6, 3.5, 2.2.



## 5. Spectroscopic data of products

### 5.1 Failed substrates.

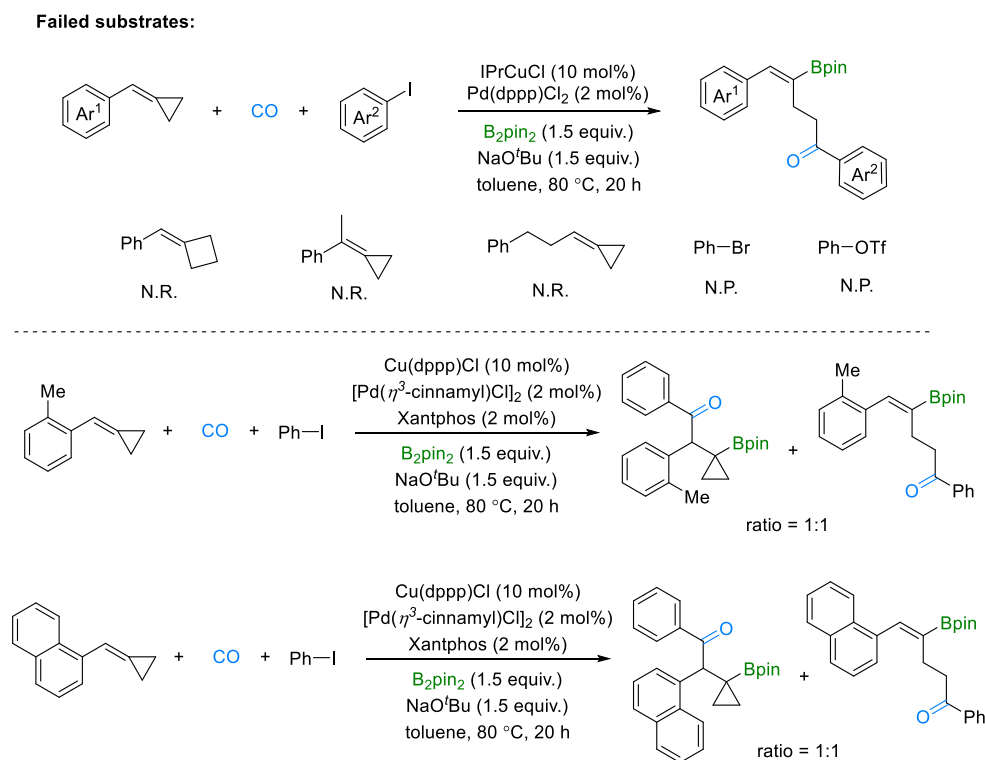

### 5.2 date of products.

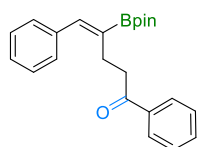

#### (Z)-1,5-Diphenyl-4-(4,4,5,5-tetramethyl-1,3,2-dioxaborolan-2-yl)pent-4-en-1-one (**3a**)

The title compound was prepared from (cyclopropylidene)methylbenzene (27  $\mu$ L, 0.2 mmol) and iodobenzene (39  $\mu$ L, 0.34 mmol), according to general borocarbonylation I (ring open). The crude residue was purified by flash chromatography (pentane/EA = 20:1, R<sub>f</sub> = 0.35) to give the product as a white solid (47.7 mg, 70%). X-ray (single-crystal) colorless block crystals of X-ray diffraction quality were obtained by slow evaporation of saturated solution of **3a** in ethyl acetate/*n*-pentane (CCDC 2123095).

<sup>1</sup>H NMR (300 MHz, CDCl<sub>3</sub>)  $\delta$  7.90 – 7.83 (m, 2H), 7.45 – 7.38 (m, 1H), 7.35 – 7.27 (m, 2H), 7.23 – 7.16 (m, 5H), 7.15 – 7.09 (m, 1H), 3.08 – 2.97 (m, 2H), 2.76 – 2.64 (m, 2H), 1.20 (s, 12H).

<sup>13</sup>C NMR (75 MHz, CDCl<sub>3</sub>)  $\delta$  200.0, 143.3, 137.5, 136.8, 132.8, 128.9, 128.4, 128.2, 128.2, 127.3, 83.5, 38.8, 24.8, 24.7.

<sup>11</sup>B NMR (96 MHz, CDCl<sub>3</sub>)  $\delta$  30.3.

HRMS (ESI): calcd for [M+Na]<sup>+</sup> C<sub>23</sub>H<sub>27</sub>BO<sub>3</sub> 384.1987, found: 384.1991.

IR (ATR): 2920, 2851, 1678, 1448, 1351, 1313, 1142, 747, 721, 688 cm<sup>-1</sup>.

Mp: 56–58 °C

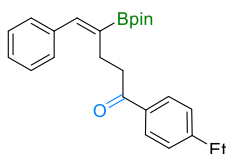

**(Z)-1-(4-Ethylphenyl)-5-phenyl-4-(4,4,5,5-tetramethyl-1,3,2-dioxaborolan-2-yl)pent-4-en-1-one (3b)**

The title compound was prepared from (cyclopropylidene)methylbenzene (27  $\mu$ L, 0.2 mmol) and 1-ethyl-4-iodobenzene (49  $\mu$ L, 0.34 mmol), according to general borocarbonylation I (ring open). The crude residue was purified by flash chromatography (pentane/EA = 20:1,  $R_f$  = 0.36) to give the product as a colorless oil (47.8 mg, 61%).

$^1\text{H NMR}$  (300 MHz,  $\text{CDCl}_3$ )  $\delta$  7.98 – 7.85 (m, 2H), 7.36 – 7.28 (m, 5H), 7.27 (d,  $J$  = 0.6 Hz, 1H), 7.26 – 7.18 (m, 2H), 3.21 – 3.04 (m, 2H), 2.88 – 2.76 (m, 2H), 2.70 (q,  $J$  = 7.6 Hz, 2H), 1.33 (s, 12H), 1.26 (t,  $J$  = 7.6 Hz, 3H).

$^{13}\text{C NMR}$  (75 MHz,  $\text{CDCl}_3$ )  $\delta$  199.7, 149.7, 143.2, 137.5, 134.6, 128.9, 128.4, 128.2, 127.9, 127.3, 83.5, 38.8, 28.9, 24.9, 24.8, 15.2.

$^{11}\text{B NMR}$  (96 MHz,  $\text{CDCl}_3$ )  $\delta$  30.3.

**HRMS (ESI):** calcd for  $[\text{M}+\text{Na}]^+$   $\text{C}_{25}\text{H}_{31}\text{BO}_3$  412.2300, found: 412.2305.

**IR (ATR):** 2970, 1673, 1350, 1319, 1142, 701  $\text{cm}^{-1}$ .

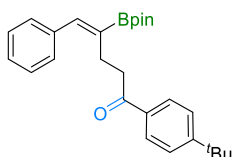

**(Z)-1-(4-(*tert*-Butyl)phenyl)-5-phenyl-4-(4,4,5,5-tetramethyl-1,3,2-dioxaborolan-2-yl)pent-4-en-1-one (3c)**

The title compound was prepared from (cyclopropylidene)methylbenzene (27  $\mu$ L, 0.2 mmol) and 1-(*tert*-butyl)-4-iodobenzene (60  $\mu$ L, 0.34 mmol), according to general borocarbonylation I (ring open). The crude residue was purified by flash chromatography (pentane/EA = 20:1,  $R_f$  = 0.38) to give the product as a white solid (58.9 mg, 70%).

$^1\text{H NMR}$  (300 MHz,  $\text{CDCl}_3$ )  $\delta$  8.00 – 7.86 (m, 2H), 7.49 – 7.41 (m, 2H), 7.36 – 7.28 (m, 5H), 7.25 – 7.13 (m, 1H), 3.19 – 3.07 (m, 2H), 2.90 – 2.76 (m, 2H), 1.35 (s, 9H), 1.33 (s, 12H).

$^{13}\text{C NMR}$  (75 MHz,  $\text{CDCl}_3$ )  $\delta$  199.7, 156.4, 143.2, 137.5, 134.3, 128.9, 128.2, 128.2, 127.3, 125.4, 83.5, 38.7, 35.0, 31.1, 24.8, 24.8.

$^{11}\text{B NMR}$  (96 MHz,  $\text{CDCl}_3$ )  $\delta$  30.2.

**HRMS (ESI):** calcd for  $[\text{M}+\text{Na}]^+$   $\text{C}_{27}\text{H}_{35}\text{BO}_3$  440.2612, found: 440.2616.

**IR (ATR):** 2965, 1679, 1370, 1313, 1266, 1140, 750, 703, 683, 492  $\text{cm}^{-1}$ .

Mp: 115-117  $^\circ\text{C}$

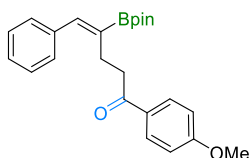

**(Z)-1-(4-Methoxyphenyl)-5-phenyl-4-(4,4,5,5-tetramethyl-1,3,2-dioxaborolan-2-yl)pent-4-en-1-one (3d)**

The title compound was prepared from (cyclopropylidenemethyl)benzene (27  $\mu$ L, 0.2 mmol) and 1-iodo-4-methoxybenzene (79.6 mg, 0.34 mmol), according to general borocarbonylation I (ring open). The crude residue was purified by flash chromatography (pentane/EA = 15:1,  $R_f$  = 0.30) to give the product as a yellow oil (65.4 mg, 83%).

$^1\text{H NMR}$  (300 MHz,  $\text{CDCl}_3$ )  $\delta$  8.04 – 7.88 (m, 2H), 7.36 – 7.28 (m, 5H), 7.26 – 7.19 (m, 1H), 6.96 – 6.84 (m, 2H), 3.86 (s, 3H), 3.17 – 3.03 (m, 2H), 2.88 – 2.72 (m, 2H), 1.32 (s, 12H).

$^{13}\text{C NMR}$  (75 MHz,  $\text{CDCl}_3$ )  $\delta$  198.7, 163.2, 143.1, 137.5, 130.5, 130.0, 128.9, 128.2, 127.3, 113.6, 83.5, 55.4, 38.6, 25.0, 24.8.

$^{11}\text{B NMR}$  (96 MHz,  $\text{CDCl}_3$ )  $\delta$  30.1.

**HRMS (ESI):** calcd for  $[\text{M}+\text{Na}]^+$   $\text{C}_{24}\text{H}_{29}\text{BO}_4$  414.2092, found: 414.2090.

**IR (ATR):** 1671, 1597, 1254, 1167, 1027, 698  $\text{cm}^{-1}$ .

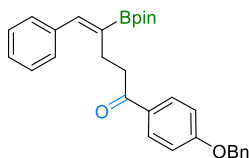

**(Z)-1-(4-(Benzyloxy)phenyl)-5-phenyl-4-(4,4,5,5-tetramethyl-1,3,2-dioxaborolan-2-yl)pent-4-en-1-one (3e)**

The title compound was prepared from (cyclopropylidenemethyl)benzene (27  $\mu$ L, 0.2 mmol) and 1-(benzyloxy)-4-iodobenzene (105.4 mg, 0.34 mmol), according to general borocarbonylation I (ring open). The crude residue was purified by flash chromatography (pentane/EA = 15:1,  $R_f$  = 0.30) to give the product as a colorless oil (78.6 mg, 84%).

$^1\text{H NMR}$  (300 MHz,  $\text{CDCl}_3$ )  $\delta$  8.02 – 7.94 (m, 2H), 7.47 – 7.28 (m, 10H), 7.27 – 7.21 (m, 1H), 7.03 – 6.96 (m, 2H), 5.13 (s, 2H), 3.16 – 3.04 (m, 2H), 2.90 – 2.74 (m, 2H), 1.33 (s, 12H).

$^{13}\text{C NMR}$  (75 MHz,  $\text{CDCl}_3$ )  $\delta$  198.6, 162.3, 143.1, 137.4, 136.2, 130.5, 130.1, 128.9, 128.6, 128.2, 128.2, 127.4, 127.2, 114.4, 83.5, 70.0, 38.6, 25.0, 24.8.

$^{11}\text{B NMR}$  (96 MHz,  $\text{CDCl}_3$ )  $\delta$  30.1.

**HRMS (ESI):** calcd for  $[\text{M}+\text{Na}]^+$   $\text{C}_{30}\text{H}_{33}\text{BO}_4$  490.2405, found: 490.2402.

**IR (ATR):** 2976, 1674, 1598, 1256, 1206, 1168, 1140, 964, 740, 696, 685  $\text{cm}^{-1}$ .

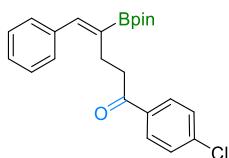

**(Z)-1-(4-Chlorophenyl)-5-phenyl-4-(4,4,5,5-tetramethyl-1,3,2-dioxaborolan-2-yl)pent-4-en-1-one (3f)**

The title compound was prepared from (cyclopropylidenemethyl)benzene (27  $\mu$ L, 0.2 mmol) and 1-chloro-4-iodobenzene (80.9 mg, 0.34 mmol), according to general borocarbonylation I (ring open). The crude residue was purified by flash chromatography (pentane/EA = 20:1,  $R_f$  = 0.38) to give the product as a white solid (54.0 mg, 68%).

$^1\text{H NMR}$  (300 MHz,  $\text{CDCl}_3$ )  $\delta$  7.98 – 7.86 (m, 2H), 7.43 – 7.36 (m, 2H), 7.36 – 7.28 (m, 5H), 7.26 – 7.19 (m, 1H), 3.16 – 3.06 (m, 2H), 2.86 – 2.74 (m, 2H), 1.32 (s, 12H).

$^{13}\text{C NMR}$  (75 MHz,  $\text{CDCl}_3$ )  $\delta$  198.8, 143.5, 139.2, 137.4, 135.1, 129.7, 128.8, 128.7, 128.3, 127.3, 83.6, 38.8, 24.8, 24.8.

$^{11}\text{B NMR}$  (96 MHz,  $\text{CDCl}_3$ )  $\delta$  30.3.

**HRMS (ESI):** calcd for  $[\text{M}+\text{Na}]^+$   $\text{C}_{23}\text{H}_{26}\text{BClO}_3$  418.1597, found: 418.1600.

**IR (ATR):** 2974, 1683, 1380, 1350, 1317, 1201, 1139, 1082, 698, 682  $\text{cm}^{-1}$ .

Mp: 82-83  $^\circ\text{C}$

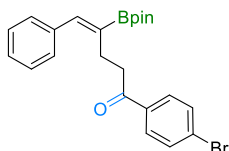

**(Z)-1-(4-Bromophenyl)-5-phenyl-4-(4,4,5,5-tetramethyl-1,3,2-dioxaborolan-2-yl)pent-4-en-1-one (3g)**

The title compound was prepared from (cyclopropylidenemethyl)benzene (27  $\mu$ L, 0.2 mmol) and 1-bromo-4-iodobenzene (95.9 mg, 0.34 mmol), according to general borocarbonylation I (ring open). The crude residue was purified by flash chromatography (pentane/EA = 20:1,  $R_f$  = 0.37) to give the product as a colorless oil (59.8 mg, 68%).

$^1\text{H NMR}$  (300 MHz,  $\text{CDCl}_3$ )  $\delta$  7.88 – 7.79 (m, 2H), 7.61 – 7.52 (m, 2H), 7.37 – 7.28 (m, 5H), 7.27 – 7.21 (m, 1H), 3.14 – 3.03 (m, 2H), 2.84 – 2.70 (m, 2H), 1.32 (s, 12H).

$^{13}\text{C NMR}$  (75 MHz,  $\text{CDCl}_3$ )  $\delta$  199.0, 143.5, 137.4, 135.5, 131.7, 129.8, 128.8, 128.3, 127.9, 127.3, 83.6, 38.8, 24.8, 24.8.

$^{11}\text{B NMR}$  (96 MHz,  $\text{CDCl}_3$ )  $\delta$  30.0.

**HRMS (ESI):** calcd for  $[\text{M}+\text{Na}]^+$   $\text{C}_{23}\text{H}_{26}\text{BBrO}_3$  462.1092, found: 462.1097.

**IR (ATR):** 2975, 1683, 1584, 1370, 1351, 1310, 1141, 1069, 1009, 750, 697  $\text{cm}^{-1}$ .

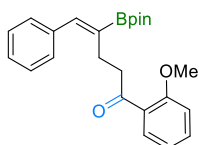

**(Z)-1-(2-Methoxyphenyl)-5-phenyl-4-(4,4,5,5-tetramethyl-1,3,2-dioxaborolan-2-yl)pent-4-en-1-one (3h)**

The title compound was prepared from (cyclopropylidene)methylbenzene (27  $\mu$ L, 0.2 mmol) and 1-iodo-2-methoxybenzene (75.9 mg, 0.34 mmol), according to general borocarbonylation I (ring open). The crude residue was purified by flash chromatography (pentane/EA = 15:1,  $R_f$  = 0.30) to give the product as a yellow oil (56.5 mg, 72%).

**$^1\text{H}$  NMR (300 MHz,  $\text{CDCl}_3$ )**  $\delta$  7.66 (dd,  $J$  = 7.7, 2.2 Hz, 1H), 7.46 – 7.39 (m, 1H), 7.35 – 7.27 (m, 5H), 7.22 (ddd,  $J$  = 6.7, 5.6, 2.3 Hz, 1H), 6.97 (td,  $J$  = 7.4, 1.0 Hz, 1H), 6.92 (dd,  $J$  = 8.3, 1.1 Hz, 1H), 3.81 (s, 3H), 3.25 – 3.10 (m, 2H), 2.86 – 2.68 (m, 2H), 1.30 (s, 12H).

**$^{13}\text{C}$  NMR (75 MHz,  $\text{CDCl}_3$ )**  $\delta$  202.3, 158.4, 142.6, 137.6, 133.0, 130.2, 129.0, 128.6, 128.1, 127.1, 120.5, 111.4, 83.4, 55.3, 43.6, 24.8, 24.5.

**$^{11}\text{B}$  NMR (96 MHz,  $\text{CDCl}_3$ )**  $\delta$  30.3.

**HRMS (ESI):** calcd for  $[\text{M}+\text{Na}]^+$   $\text{C}_{24}\text{H}_{29}\text{BO}_4$  414.2092, found: 414.2093.

**IR (ATR):** 2973, 1670, 1596, 1484, 1464, 1436, 1284, 1243, 1179, 1156, 1111, 1022, 948, 754, 698  $\text{cm}^{-1}$ .

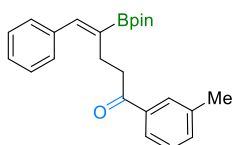

**(Z)-5-Phenyl-4-(4,4,5,5-tetramethyl-1,3,2-dioxaborolan-2-yl)-1-(*m*-tolyl)pent-4-en-1-one (3i)**

The title compound was prepared from (cyclopropylidene)methylbenzene (27  $\mu$ L, 0.2 mmol) and 1-iodo-3-methylbenzene (49  $\mu$ L, 0.34 mmol), according to general borocarbonylation I (ring open). The crude residue was purified by flash chromatography (pentane/EA = 20:1,  $R_f$  = 0.35) to give the product as a white solid (50.6 mg, 67%).

**$^1\text{H}$  NMR (300 MHz,  $\text{CDCl}_3$ )**  $\delta$  7.83 – 7.74 (m, 2H), 7.38 – 7.26 (m, 7H), 7.25 – 7.14 (m, 1H), 3.20 – 3.07 (m, 2H), 2.88 – 2.74 (m, 2H), 2.40 (s, 3H), 1.33 (s, 12H).

**$^{13}\text{C}$  NMR (75 MHz,  $\text{CDCl}_3$ )**  $\delta$  200.2, 143.2, 138.2, 137.5, 136.9, 133.5, 128.9, 128.7, 128.3, 128.2, 127.3, 125.4, 83.5, 38.9, 24.8, 24.8, 21.3.

**$^{11}\text{B}$  NMR (96 MHz,  $\text{CDCl}_3$ )**  $\delta$  30.1.

**HRMS (ESI):** calcd for  $[\text{M}+\text{Na}]^+$   $\text{C}_{24}\text{H}_{29}\text{BO}_3$  398.2143, found: 398.2151.

**IR (ATR):** 2979, 1677, 1371, 1339, 1315, 1282, 1156, 1141, 771, 758, 701, 690, 684  $\text{cm}^{-1}$ .

Mp: 94-96  $^\circ\text{C}$

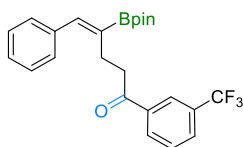

**(Z)-5-Phenyl-4-(4,4,5,5-tetramethyl-1,3,2-dioxaborolan-2-yl)-1-(3-(trifluoromethyl)phenyl)pent-4-en-1-one (3j)**

The title compound was prepared from (cyclopropylidene)methylbenzene (27  $\mu$ L, 0.2 mmol) and 1-iodo-3-(trifluoromethyl)benzene (49  $\mu$ L, 0.34 mmol), according to general borocarbonylation I (ring open). The crude residue was purified by flash chromatography (pentane/EA = 20:1,  $R_f$  = 0.35) to give the product as a colorless oil (43.0 mg, 50%).

$^1\text{H NMR}$  (300 MHz,  $\text{CDCl}_3$ )  $\delta$  8.24 (dt,  $J$  = 1.8, 1.1 Hz, 1H), 8.17 – 8.13 (m, 1H), 7.79 (ddt,  $J$  = 7.8, 1.2, 0.6 Hz, 1H), 7.57 (tt,  $J$  = 7.8, 0.8 Hz, 1H), 7.35 – 7.29 (m, 5H), 7.26 – 7.20 (m, 1H), 3.22 – 3.11 (m, 2H), 2.89 – 2.76 (m, 2H), 1.32 (s, 12H).

$^{13}\text{C NMR}$  (75 MHz,  $\text{CDCl}_3$ )  $\delta$  198.7, 143.7, 137.4, 137.3, 131.4 (q,  $J$  = 1.3 Hz), 131.1 (q,  $J$  = 32.9 Hz), 130.1, 129.2 (d,  $J$  = 3.7 Hz), 129.1, 128.3, 127.4, 125.1 (q,  $J$  = 3.6 Hz), 123.7 (d,  $J$  = 272.5 Hz), 83.7, 38.9, 24.8, 24.1.

$^{11}\text{B NMR}$  (96 MHz,  $\text{CDCl}_3$ )  $\delta$  30.3.

$^{19}\text{F NMR}$  (282 MHz,  $\text{CDCl}_3$ )  $\delta$  -62.7.

**HRMS (ESI):** calcd for  $[\text{M}+\text{Na}]^+$   $\text{C}_{24}\text{H}_{26}\text{BF}_3\text{O}_3$  452.1860, found: 452.1865.

**IR (ATR):** 2977, 1689, 1372, 1327, 1255, 1165, 1125, 1071, 755, 693, 654  $\text{cm}^{-1}$ .

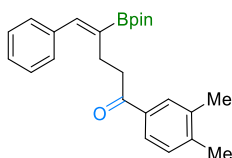

**(Z)-1-(3,4-Dimethylphenyl)-5-phenyl-4-(4,4,5,5-tetramethyl-1,3,2-dioxaborolan-2-yl)pent-4-en-1-one (3k)**

The title compound was prepared from (cyclopropylidene)methylbenzene (27  $\mu$ L, 0.2 mmol) and 4-iodo-1,2-dimethylbenzene (48  $\mu$ L, 0.34 mmol), according to general borocarbonylation I (ring open). The crude residue was purified by flash chromatography (pentane/EA = 20:1,  $R_f$  = 0.32) to give the product as a white solid (55.0 mg, 71%).

$^1\text{H NMR}$  (300 MHz,  $\text{CDCl}_3$ )  $\delta$  7.82 – 7.65 (m, 2H), 7.40 – 7.27 (m, 5H), 7.26 – 7.21 (m, 1H), 7.19 (d,  $J$  = 7.6 Hz, 1H), 3.18 – 3.06 (m, 2H), 2.88 – 2.75 (m, 2H), 2.30 (s, 6H), 1.33 (s, 12H).

$^{13}\text{C NMR}$  (75 MHz,  $\text{CDCl}_3$ )  $\delta$  200.0, 143.1, 142.2, 137.5, 136.7, 134.8, 129.7, 129.3, 128.9, 128.2, 127.3, 126.0, 83.5, 38.8, 25.0, 24.8, 20.0, 19.8.

$^{11}\text{B NMR}$  (96 MHz,  $\text{CDCl}_3$ )  $\delta$  30.1.

**HRMS (ESI):** calcd for  $[\text{M}+\text{Na}]^+$   $\text{C}_{25}\text{H}_{31}\text{BO}_3$  412.2300, found: 412.2300.

**IR (ATR):** 2977, 1681, 1377, 1352, 1341, 1315, 1278, 1140, 699, 686  $\text{cm}^{-1}$ .

Mp: 114-116 °C

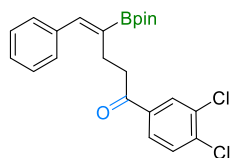

**(Z)-1-(3,4-Dichlorophenyl)-5-phenyl-4-(4,4,5,5-tetramethyl-1,3,2-dioxaborolan-2-yl)pent-4-en-1-one (3l)**

The title compound was prepared from (cyclopropylidenemethyl)benzene (27  $\mu$ L, 0.2 mmol) and 1,2-dichloro-4-iodobenzene (92.8 mg, 0.34 mmol), according to general borocarbonylation I (ring open). The crude residue was purified by flash chromatography (pentane/EA = 20:1,  $R_f$  = 0.40) to give the product as a colorless oil (37.9 mg, 44%).

$^1\text{H NMR}$  (300 MHz,  $\text{CDCl}_3$ )  $\delta$  8.08 (d,  $J$  = 2.0 Hz, 1H), 7.79 (dd,  $J$  = 8.4, 2.1 Hz, 1H), 7.50 (d,  $J$  = 8.4 Hz, 1H), 7.36 – 7.28 (m, 5H), 7.26 – 7.20 (m, 1H), 3.11 – 3.03 (m, 2H), 2.78 (dd,  $J$  = 8.3, 6.5 Hz, 2H), 1.33 (s, 12H).

$^{13}\text{C NMR}$  (75 MHz,  $\text{CDCl}_3$ )  $\delta$  197.9, 143.7, 137.3, 136.3, 133.1, 130.6, 130.4, 128.8, 128.3, 127.4, 127.3, 83.7, 39.0, 24.9, 24.8.

$^{11}\text{B NMR}$  (96 MHz,  $\text{CDCl}_3$ )  $\delta$  30.5.

**HRMS (ESI):** calcd for  $[\text{M}+\text{Na}]^+$   $\text{C}_{23}\text{H}_{25}\text{BCl}_2\text{O}_3$  452.1207, found: 452.1204.

**IR (ATR):** 2975, 1686, 1372, 1350, 1310, 1269, 1140, 1029, 752, 698, 674  $\text{cm}^{-1}$ .

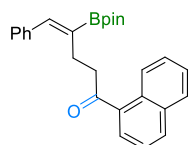

**(Z)-1-(Naphthalen-1-yl)-5-phenyl-4-(4,4,5,5-tetramethyl-1,3,2-dioxaborolan-2-yl)pent-4-en-1-one (3m)**

The title compound was prepared from (cyclopropylidenemethyl)benzene (27  $\mu$ L, 0.2 mmol) and 1-iodonaphthalene (50  $\mu$ L, 0.34 mmol), according to general borocarbonylation I (ring open). The crude residue was purified by flash chromatography (pentane/EA = 20:1,  $R_f$  = 0.35) to give the product as a yellow oil (61.6 mg, 75%).

$^1\text{H NMR}$  (300 MHz,  $\text{CDCl}_3$ )  $\delta$  8.61 (ddd,  $J$  = 8.0, 1.7, 0.8 Hz, 1H), 7.99 – 7.93 (m, 1H), 7.91 – 7.84 (m, 2H), 7.62 – 7.51 (m, 2H), 7.51 – 7.45 (m, 1H), 7.38 – 7.28 (m, 5H), 7.27 – 7.19 (m, 1H), 3.33 – 3.20 (m, 2H), 2.99 – 2.80 (m, 2H), 1.32 (s, 12H).

$^{13}\text{C NMR}$  (75 MHz,  $\text{CDCl}_3$ )  $\delta$  204.3, 143.2, 137.4, 135.9, 133.9, 132.3, 130.2, 128.9, 128.3, 128.2, 127.7, 127.6, 127.3, 126.3, 125.9, 124.3, 83.5, 42.2, 25.0, 24.8.

$^{11}\text{B NMR}$  (96 MHz,  $\text{CDCl}_3$ )  $\delta$  30.0.

**HRMS (ESI):** calcd for  $[\text{M}+\text{Na}]^+$   $\text{C}_{27}\text{H}_{29}\text{BO}_3$  434.2163, found: 434.2141.

**IR (ATR):** 2972, 1677, 1380, 1371, 1313, 1282, 1136, 1098, 787, 772, 749, 698, 686, 482 cm<sup>-1</sup>.

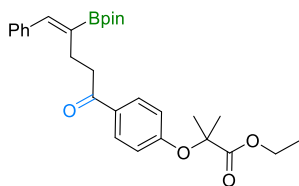

**Ethyl (Z)-2-methyl-2-(4-(5-phenyl-4-(4,4,5,5-tetramethyl-1,3,2-dioxaborolan-2-yl)pent-4-enyl)phenoxy)propanoate (3n)**

The title compound was prepared from (cyclopropylidene)methylbenzene (27  $\mu$ L, 0.2 mmol) and ethyl 2-(4-iodophenoxy)-2-methylpropanoate (113.6 mg, 0.34 mmol), according to general borocarbonylation I (ring open). The crude residue was purified by flash chromatography (pentane/EA = 15:1, R<sub>f</sub> = 0.25) to give the product as a colorless oil (61.2 mg, 62%).

**<sup>1</sup>H NMR (300 MHz, CDCl<sub>3</sub>)**  $\delta$  7.94 – 7.87 (m, 2H), 7.35 – 7.27 (m, 5H), 7.26 – 7.19 (m, 1H), 6.85 – 6.75 (m, 2H), 4.22 (q, *J* = 7.2 Hz, 2H), 3.14 – 3.02 (m, 2H), 2.78 (dd, *J* = 9.8, 7.9 Hz, 2H), 1.65 (s, 6H), 1.31 (s, 12H), 1.21 (t, *J* = 7.2 Hz, 3H).

**<sup>13</sup>C NMR (75 MHz, CDCl<sub>3</sub>)**  $\delta$  198.6, 173.7, 159.5, 143.2, 137.4, 130.5, 130.0, 128.9, 128.2, 127.3, 117.3, 83.5, 79.2, 61.6, 38.6, 25.3, 24.9, 24.8, 14.0.

**<sup>11</sup>B NMR (96 MHz, CDCl<sub>3</sub>)**  $\delta$  29.8.

**HRMS (ESI):** calcd for [M+H]<sup>+</sup> C<sub>29</sub>H<sub>37</sub>BO<sub>6</sub> 492.2798, found: 492.2809.

**IR (ATR):** 2979, 1732, 1676, 1597, 1367, 1286, 1244, 1169, 1137, 1021, 966, 835, 699, 493 cm<sup>-1</sup>.

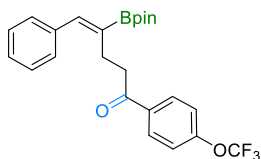

**(Z)-5-Phenyl-4-(4,4,5,5-tetramethyl-1,3,2-dioxaborolan-2-yl)-1-(4-(trifluoromethoxy)phenyl)pent-4-en-1-one (3o)**

The title compound was prepared from (cyclopropylidene)methylbenzene (27  $\mu$ L, 0.2 mmol) and 1-iodo-4-(trifluoromethoxy)benzene (51  $\mu$ L, 0.34 mmol), according to general borocarbonylation I (ring open). The crude residue was purified by flash chromatography (pentane/EA = 20:1, R<sub>f</sub> = 0.40) to give the product as a colorless oil (59.0 mg, 66%).

**<sup>1</sup>H NMR (400 MHz, CDCl<sub>3</sub>)**  $\delta$  8.01 – 7.85 (m, 2H), 7.28 – 7.20 (m, 5H), 7.19 – 7.12 (m, 3H), 3.08 – 2.98 (m, 2H), 2.77 – 2.66 (m, 2H), 1.23 (s, 12H).

**<sup>13</sup>C NMR (101 MHz, CDCl<sub>3</sub>)**  $\delta$  198.5, 152.4 (q, *J* = 1.8 Hz), 143.5, 137.4, 135.0, 130.2, 128.8, 128.3, 127.4, 120.3, 120.3 (q, *J* = 258.5 Hz), 83.6, 38.9, 24.8, 24.7.

**<sup>11</sup>B NMR (128 MHz, CDCl<sub>3</sub>)**  $\delta$  30.6.

**<sup>19</sup>F NMR (376 MHz, CDCl<sub>3</sub>)**  $\delta$  -57.59.

**HRMS (ESI):** calcd for [M+Na]<sup>+</sup> C<sub>24</sub>H<sub>26</sub>BF<sub>3</sub>O<sub>4</sub> 468.1810, found: 468.1813.



**IR (ATR):** 1686, 1372, 1251, 1204, 1162, 1141, 1109, 1082, 859, 750, 698  $\text{cm}^{-1}$ .

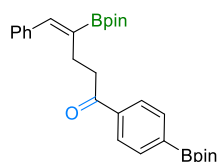

**(Z)-5-Phenyl-4-(4,4,5,5-tetramethyl-1,3,2-dioxaborolan-2-yl)-1-(4-(4,4,5,5-tetramethyl-1,3,2-dioxaborolan-2-yl)phenyl)pent-4-en-1-one (3p)**

The title compound was prepared from (cyclopropylidene)methylbenzene (27  $\mu\text{L}$ , 0.2 mmol) and 2-(4-iodophenyl)-4,4,5,5-tetramethyl-1,3,2-dioxaborolane (111.2 mg, 0.34 mmol), according to general borocarbonylation I (ring open). The crude residue was purified by flash chromatography (pentane/EA = 20:1,  $R_f$  = 0.18) to give the product as a yellow oil (83.8 mg, 86%).

**$^1\text{H}$  NMR (300 MHz,  $\text{CDCl}_3$ )**  $\delta$  7.98 – 7.93 (m, 2H), 7.90 – 7.84 (m, 2H), 7.36 – 7.29 (m, 5H), 7.26 – 7.19 (m, 1H), 3.20 – 3.09 (m, 2H), 2.81 (dd,  $J$  = 9.6, 6.9 Hz, 2H), 1.36 (s, 12H), 1.32 (s, 12H).

**$^{13}\text{C}$  NMR (75 MHz,  $\text{CDCl}_3$ )**  $\delta$  200.3, 143.3, 138.8, 137.5, 134.8, 128.9, 128.2, 127.3, 127.2, 124.2, 84.1, 83.6, 39.0, 25.0, 24.9, 24.8, 24.8.

**$^{11}\text{B}$  NMR (96 MHz,  $\text{CDCl}_3$ )**  $\delta$  30.1.

**HRMS (ESI):** calcd for  $[\text{M}+\text{Na}]^+$   $\text{C}_{29}\text{H}_{38}\text{B}_2\text{O}_5$  509.2875, found: 509.2886.

**IR (ATR):** 2976, 1678, 1598, 1367, 1204, 1153, 1108, 948, 882, 828, 743, 697, 550, 495  $\text{cm}^{-1}$ .

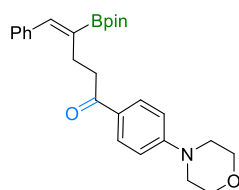

**(Z)-1-(4-Morpholinophenyl)-5-phenyl-4-(4,4,5,5-tetramethyl-1,3,2-dioxaborolan-2-yl)pent-4-en-1-one (3q)**

The title compound was prepared from (cyclopropylidene)methylbenzene (27  $\mu\text{L}$ , 0.2 mmol) and 4-(4-iodophenyl)morpholine (97.9 mg, 0.34 mmol), according to general borocarbonylation I (ring open). The crude residue was purified by flash chromatography (pentane/EA = 10:1,  $R_f$  = 0.25) to give the product as a yellow oil (80.0 mg, 89%).

**$^1\text{H}$  NMR (300 MHz,  $\text{CDCl}_3$ )**  $\delta$  7.96 – 7.87 (m, 2H), 7.37 – 7.28 (m, 5H), 7.26 – 7.19 (m, 1H), 6.88 – 6.81 (m, 2H), 3.88 – 3.82 (m, 4H), 3.32 – 3.24 (m, 4H), 3.11 – 3.03 (m, 2H), 2.86 – 2.71 (m, 2H), 1.32 (s, 12H).

**$^{13}\text{C}$  NMR (75 MHz,  $\text{CDCl}_3$ )**  $\delta$  198.3, 154.0, 142.9, 137.5, 130.2, 128.9, 128.2, 127.8, 127.2, 113.3, 83.5, 66.5, 47.6, 38.3, 25.1, 24.8.

**$^{11}\text{B}$  NMR (96 MHz,  $\text{CDCl}_3$ )**  $\delta$  30.0.

**HRMS (ESI):** calcd for  $[\text{M}+\text{H}]^+$   $\text{C}_{27}\text{H}_{34}\text{BNO}_4$  447.2695, found: 447.2703.

**IR (ATR):** 2973, 1666, 1596, 1186, 1140, 1112, 926  $\text{cm}^{-1}$ .

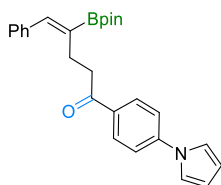

**(Z)-1-(4-(1H-Pyrrol-1-yl)phenyl)-5-phenyl-4-(4,4,5,5-tetramethyl-1,3,2-dioxaborolan-2-yl)pent-4-en-1-one (3r)**

The title compound was prepared from (cyclopropylidenemethyl)benzene (27  $\mu$ L, 0.2 mmol) and 1-(4-iodophenyl)-1H-pyrrole (91.1 mg, 0.34 mmol), according to general borocarbonylation I (ring open). The crude residue was purified by flash chromatography (pentane/EA = 20:1,  $R_f$  = 0.30) to give the product as a yellow oil (72.6 mg, 85%).

**$^1\text{H}$  NMR (300 MHz,  $\text{CDCl}_3$ )**  $\delta$  8.10 – 8.02 (m, 2H), 7.48 – 7.39 (m, 2H), 7.34 (d,  $J$  = 4.5 Hz, 5H), 7.28 – 7.21 (m, 1H), 7.19 – 7.14 (m, 2H), 6.43 – 6.34 (m, 2H), 3.20 – 3.07 (m, 2H), 2.92 – 2.76 (m, 2H), 1.33 (s, 12H).

**$^{13}\text{C}$  NMR (75 MHz,  $\text{CDCl}_3$ )**  $\delta$  198.7, 143.8, 143.4, 137.4, 133.7, 130.1, 128.9, 128.3, 127.3, 119.3, 119.0, 111.5, 83.6, 38.8, 25.0, 24.8.

**$^{11}\text{B}$  NMR (96 MHz,  $\text{CDCl}_3$ )**  $\delta$  30.1.

**HRMS (ESI):** calcd for  $[\text{M}+\text{Na}]^+$   $\text{C}_{27}\text{H}_{30}\text{BNO}_3$  449.2252, found: 449.2260.

**IR (ATR):** 1610, 1517, 1351, 1329, 1145, 1130, 1062, 1045, 840, 730, 696  $\text{cm}^{-1}$ .

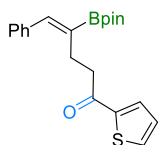

**(Z)-5-Phenyl-4-(4,4,5,5-tetramethyl-1,3,2-dioxaborolan-2-yl)-1-(thiophen-2-yl)pent-4-en-1-one (3s)**

The title compound was prepared from (cyclopropylidenemethyl)benzene (27  $\mu$ L, 0.2 mmol) and 2-iodothiophene (38  $\mu$ L, 0.34 mmol), according to general borocarbonylation I (ring open). The crude residue was purified by flash chromatography (pentane/EA = 20:1,  $R_f$  = 0.25) to give the product as a yellow oil (47.6 mg, 65%).

**$^1\text{H}$  NMR (300 MHz,  $\text{CDCl}_3$ )**  $\delta$  7.73 (dd,  $J$  = 3.8, 1.1 Hz, 1H), 7.60 (dd,  $J$  = 5.0, 1.2 Hz, 1H), 7.37 – 7.28 (m, 5H), 7.27 – 7.21 (m, 1H), 7.10 (dd,  $J$  = 5.0, 3.9 Hz, 1H), 3.14 – 3.03 (m, 2H), 2.87 – 2.76 (m, 2H), 1.32 (s, 12H).

**$^{13}\text{C}$  NMR (75 MHz,  $\text{CDCl}_3$ )**  $\delta$  193.0, 144.4, 143.4, 137.4, 133.3, 131.9, 128.9, 128.3, 127.9, 127.3, 83.6, 39.5, 25.1, 24.8.

**$^{11}\text{B}$  NMR (96 MHz,  $\text{CDCl}_3$ )**  $\delta$  30.4.

**HRMS (ESI):** calcd for  $[\text{M}+\text{Na}]^+$   $\text{C}_{21}\text{H}_{25}\text{BO}_3\text{S}$  390.1551, found: 390.1552.

**IR (ATR):** 2975, 1659, 1413, 1371, 1351, 1310, 1267, 1141, 1081, 755, 722, 699  $\text{cm}^{-1}$ .

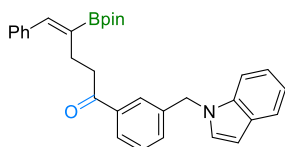

**(Z)-1-(4-((1H-Indol-1-yl)methyl)phenyl)-5-phenyl-4-(4,4,5,5-tetramethyl-1,3,2-dioxaborolan-2-yl)pent-4-en-1-one (3t)**

The title compound was prepared from (cyclopropylidene)methylbenzene (27  $\mu$ L, 0.2 mmol) and 1-(3-iodobenzyl)-1*H*-indole (113.2 mg, 0.34 mmol), according to general borocarbonylation I (ring open). The crude residue was purified by flash chromatography (pentane/EA = 20:1,  $R_f$  = 0.15) to give the product as a colorless oil (78.0 mg, 79%).

**$^1\text{H}$  NMR (300 MHz,  $\text{CDCl}_3$ )**  $\delta$  7.82 – 7.75 (m, 2H), 7.58 (ddd,  $J$  = 7.4, 1.5, 0.8 Hz, 1H), 7.29 – 7.21 (m, 6H), 7.21 – 7.13 (m, 2H), 7.13 – 7.01 (m, 4H), 6.49 (dd,  $J$  = 3.2, 0.9 Hz, 1H), 5.27 (s, 2H), 3.09 – 2.97 (m, 2H), 2.74 (dd,  $J$  = 9.1, 6.6 Hz, 2H), 1.23 (s, 12H).

**$^{13}\text{C}$  NMR (75 MHz,  $\text{CDCl}_3$ )**  $\delta$  199.6, 143.3, 138.1, 137.4, 137.2, 136.1, 131.0, 129.0, 128.9, 128.7, 128.2, 128.0, 127.6, 127.3, 126.5, 121.8, 121.0, 119.6, 109.5, 102.0, 83.5, 49.8, 38.8, 24.8, 24.6.

**$^{11}\text{B}$  NMR (96 MHz,  $\text{CDCl}_3$ )**  $\delta$  29.9.

**HRMS (ESI):** calcd for  $[\text{M}+\text{Na}]^+$   $\text{C}_{32}\text{H}_{34}\text{BNO}_3$  513.2565, found: 513.2568.

**IR (ATR):** 1681, 1462, 1348, 1311, 1254, 1141, 738, 690, 425  $\text{cm}^{-1}$ .

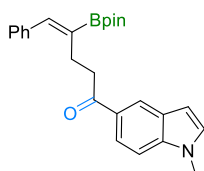

**(Z)-1-(1-Methyl-1H-indol-5-yl)-5-phenyl-4-(4,4,5,5-tetramethyl-1,3,2-dioxaborolan-2-yl)pent-4-en-1-one (3u)**

The title compound was prepared from (cyclopropylidene)methylbenzene (27  $\mu$ L, 0.2 mmol) and 5-iodo-1-methyl-1*H*-indole (87.0 mg, 0.34 mmol), according to general borocarbonylation I (ring open). The crude residue was purified by flash chromatography (pentane/EA = 5:1,  $R_f$  = 0.25) to give the product as a red solid (56.9 mg, 57%).

**$^1\text{H}$  NMR (300 MHz,  $\text{CDCl}_3$ )**  $\delta$  8.37 (dd,  $J$  = 1.7, 0.7 Hz, 1H), 7.94 (dd,  $J$  = 8.7, 1.7 Hz, 1H), 7.40 – 7.29 (m, 6H), 7.26 – 7.19 (m, 1H), 7.11 (d,  $J$  = 3.1 Hz, 1H), 6.59 (dd,  $J$  = 3.2, 0.9 Hz, 1H), 3.81 (s, 3H), 3.29 – 3.19 (m, 2H), 2.94 – 2.81 (m, 2H), 1.35 (s, 12H).

**$^{13}\text{C}$  NMR (75 MHz,  $\text{CDCl}_3$ )**  $\delta$  200.1, 142.9, 139.0, 137.5, 130.2, 129.0, 128.9, 128.2, 127.8, 127.2, 123.0, 121.9, 109.0, 102.9, 83.5, 38.8, 33.0, 25.4, 24.8.

**$^{11}\text{B}$  NMR (96 MHz,  $\text{CDCl}_3$ )**  $\delta$  30.4.

**HRMS (ESI):** calcd for  $[\text{M}+\text{H}]^+$   $\text{C}_{26}\text{H}_{30}\text{BNO}_3$  415.2433, found: 415.2441.

**IR (ATR):** 1666, 1346, 1312, 1299, 1137, 732, 685  $\text{cm}^{-1}$ .

Mp: 99-101  $^\circ\text{C}$

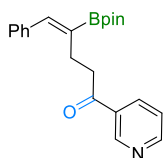

**(Z)-5-Phenyl-1-(pyridin-3-yl)-4-(4,4,5,5-tetramethyl-1,3,2-dioxaborolan-2-yl)pent-4-en-1-one (3v)**

The title compound was prepared from (cyclopropylidene)methylbenzene (27  $\mu$ L, 0.2 mmol) and 3-iodopyridine (69.7 mg, 0.34 mmol), according to general borocarbonylation I (ring open). The crude residue was purified by flash chromatography (pentane/EA = 5:1,  $R_f$  = 0.20) to give the product as a yellow oil (41.9 mg, 58%).

**$^1\text{H}$  NMR (300 MHz, DMSO)**  $\delta$  9.08 (br, 1H), 8.29 (d,  $J$  = 7.8 Hz, 1H), 7.63 (br, 1H), 7.41 – 7.23 (m, 5H), 7.18 (s, 1H), 3.30 – 3.14 (m, 2H), 2.66 (t,  $J$  = 7.3 Hz, 2H), 1.23 (s, 12H).

**$^{13}\text{C}$  NMR (75 MHz, DMSO)**  $\delta$  198.9, 142.6, 136.8, 135.6, 128.8, 128.4, 127.6, 83.4, 38.3, 24.6, 24.1.

**$^{11}\text{B}$  NMR (96 MHz,  $\text{CDCl}_3$ )**  $\delta$  30.4.

**HRMS (ESI):** calcd for  $[\text{M}+\text{Na}]^+$   $\text{C}_{22}\text{H}_{26}\text{BNO}_3$  386.1902, found: 386.1903.

**IR (ATR):** 1685, 1373, 1314, 1144, 1052, 1023, 1004, 821, 758, 704, 620  $\text{cm}^{-1}$ .

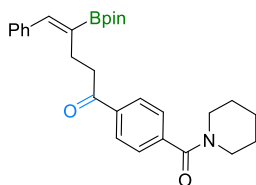

**(Z)-5-Phenyl-1-(4-(piperidine-1-carbonyl)phenyl)-4-(4,4,5,5-tetramethyl-1,3,2-dioxaborolan-2-yl)pent-4-en-1-one (3w)**

The title compound was prepared from (cyclopropylidene)methylbenzene (27  $\mu$ L, 0.2 mmol) and (4-iodophenyl)(piperidin-1-yl)methanone (107.1 mg, 0.34 mmol), according to general borocarbonylation I (ring open). The crude residue was purified by flash chromatography (pentane/EA = 2:1,  $R_f$  = 0.20) to give the product as a brown oil (80.7 mg, 85%).

**$^1\text{H}$  NMR (300 MHz,  $\text{CDCl}_3$ )**  $\delta$  8.03 – 7.97 (m, 2H), 7.47 – 7.41 (m, 2H), 7.32 (d,  $J$  = 4.2 Hz, 5H), 7.26 – 7.20 (m, 1H), 3.71 (br, 2H), 3.29 (br, 2H), 3.18 – 3.09 (m, 2H), 2.87 – 2.75 (m, 2H), 1.68 – 1.52 (m, 6H), 1.31 (s, 12H).

**$^{13}\text{C}$  NMR (75 MHz,  $\text{CDCl}_3$ )**  $\delta$  199.4, 169.2, 143.4, 140.6, 137.4, 137.3, 128.8, 128.4, 128.3, 127.3, 126.9, 83.6, 48.6, 39.0, 25.6, 24.8, 24.8, 24.5.

**$^{11}\text{B}$  NMR (96 MHz,  $\text{CDCl}_3$ )**  $\delta$  29.7.

**HRMS (ESI):** calcd for  $[\text{M}+\text{H}]^+$   $\text{C}_{29}\text{H}_{36}\text{BNO}_4$  473.2852, found: 473.2861.

**IR (ATR):** 2934, 1682, 1618, 1371, 1350, 1310, 1272, 1141, 751, 699  $\text{cm}^{-1}$ .

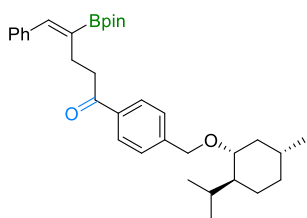

**(Z)-1-(4-(((1R,2S,5R)-2-Isopropyl-5-methylcyclohexyl)oxy)methyl)phenyl)-5-phenyl-4-(4,4,5,5-tetramethyl-1,3,2-dioxaborolan-2-yl)pent-4-en-1-one (3x)**

The title compound was prepared from (cyclopropylidenemethyl)benzene (27  $\mu$ L, 0.2 mmol) and 1-iodo-4-(((1R,2S,5R)-2-isopropyl-5-methylcyclohexyl)oxy)methyl)benzene (126.4 mg, 0.34 mmol), according to general borocarbonylation I (ring open). The crude residue was purified by flash chromatography (pentane/EA = 20:1,  $R_f$  = 0.30) to give the product as a colorless oil (65.0 mg, 61%).

**$^1\text{H}$  NMR (300 MHz,  $\text{CDCl}_3$ )**  $\delta$  8.01 – 7.90 (m, 2H), 7.46 – 7.37 (m, 2H), 7.37 – 7.28 (m, 5H), 7.27 – 7.20 (m, 1H), 4.71 (d,  $J$  = 12.4 Hz, 1H), 4.45 (d,  $J$  = 12.4 Hz, 1H), 3.27 – 3.07 (m, 3H), 2.81 (dd,  $J$  = 9.8, 6.9 Hz, 2H), 2.30 (pd,  $J$  = 7.0, 2.7 Hz, 1H), 2.24 – 2.13 (m, 1H), 1.72 – 1.58 (m, 2H), 1.32 (s, 14H), 0.97 – 0.87 (m, 9H), 0.74 (d,  $J$  = 7.0 Hz, 3H).

**$^{13}\text{C}$  NMR (75 MHz,  $\text{CDCl}_3$ )**  $\delta$  199.7, 144.4, 143.2, 137.4, 135.9, 128.9, 128.3, 128.2, 127.4, 127.3, 83.5, 79.2, 69.7, 48.3, 40.2, 38.9, 34.5, 31.5, 25.6, 24.8, 23.2, 22.3, 21.0, 16.1.

**$^{11}\text{B}$  NMR (96 MHz,  $\text{CDCl}_3$ )**  $\delta$  29.9.

**HRMS (ESI):** calcd for  $[\text{M}+\text{Na}]^+$   $\text{C}_{34}\text{H}_{47}\text{BO}_4$  552.3500, found: 552.3511.

**IR (ATR):** 2952, 2920, 1681, 1370, 1351, 1309, 1269, 1142, 1107, 1084, 962, 751, 698  $\text{cm}^{-1}$ .

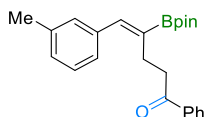

**(Z)-1-Phenyl-4-(4,4,5,5-tetramethyl-1,3,2-dioxaborolan-2-yl)-5-(*o*-tolyl)pent-4-en-1-one (3y)**

The title compound was prepared from 1-(cyclopropylidenemethyl)-3-methylbenzene (32  $\mu$ L, 0.2 mmol) and iodobenzene (39  $\mu$ L, 0.34 mmol), according to general borocarbonylation I (ring open). The crude residue was purified by flash chromatography (pentane/EA = 20:1,  $R_f$  = 0.35) to give the product as a colorless oil (46.9 mg, 62%).

**$^1\text{H}$  NMR (300 MHz,  $\text{CDCl}_3$ )**  $\delta$  8.06 – 7.89 (m, 2H), 7.58 – 7.50 (m, 1H), 7.48 – 7.39 (m, 2H), 7.29 (d,  $J$  = 1.1 Hz, 1H), 7.22 (dd,  $J$  = 8.2, 7.3 Hz, 1H), 7.17 – 7.11 (m, 2H), 7.09 – 7.02 (m, 1H), 3.20 – 3.08 (m, 2H), 2.81 (dd,  $J$  = 7.7, 6.7 Hz, 2H), 2.32 (s, 3H), 1.32 (s, 12H).

**$^{13}\text{C}$  NMR (75 MHz,  $\text{CDCl}_3$ )**  $\delta$  200.1, 143.4, 137.7, 137.4, 136.9, 132.8, 129.7, 128.4, 128.2, 128.1, 128.1, 125.9, 83.5, 38.9, 24.8, 24.8, 21.4.

**$^{11}\text{B}$  NMR (96 MHz,  $\text{CDCl}_3$ )**  $\delta$  30.1.

**HRMS (ESI):** calcd for  $[\text{M}+\text{Na}]^+$   $\text{C}_{24}\text{H}_{29}\text{BO}_3$  398.2143, found: 398.2149.

**IR (ATR):** 2974, 1682, 1371, 1340, 1309, 1267, 1141, 1079, 963, 743, 687  $\text{cm}^{-1}$ .

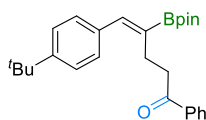

**(Z)-5-(4-(*tert*-Butyl)phenyl)-1-phenyl-4-(4,4,5,5-tetramethyl-1,3,2-dioxaborolan-2-yl)pent-4-en-1-one (3z)**

The title compound was prepared from 1-(*tert*-butyl)-4-(cyclopropylidenemethyl)benzene (40  $\mu$ L, 0.2 mmol) and iodobenzene (39  $\mu$ L, 0.34 mmol), according to general borocarbonylation I (ring open). The crude residue was purified by flash chromatography (pentane/EA = 20:1,  $R_f$  = 0.35) to give the product as a white solid (42.7 mg, 51%).

$^1\text{H NMR}$  (300 MHz,  $\text{CDCl}_3$ )  $\delta$  8.06 – 7.95 (m, 2H), 7.58 – 7.51 (m, 1H), 7.48 – 7.41 (m, 2H), 7.35 (d,  $J$  = 8.1 Hz, 2H), 7.32 – 7.26 (m, 3H), 3.25 – 3.11 (m, 2H), 2.92 – 2.76 (m, 2H), 1.32 (s, 12H), 1.31 (s, 9H).

$^{13}\text{C NMR}$  (75 MHz,  $\text{CDCl}_3$ )  $\delta$  200.2, 150.3, 143.1, 136.9, 134.5, 132.8, 128.8, 128.4, 128.2, 125.2, 83.5, 38.9, 34.5, 31.3, 24.9, 24.8.

$^{11}\text{B NMR}$  (96 MHz,  $\text{CDCl}_3$ )  $\delta$  30.1.

**HRMS (ESI):** calcd for  $[\text{M}+\text{Na}]^+$   $\text{C}_{27}\text{H}_{35}\text{BO}_3$  440.2612, found: 440.2613.

**IR (ATR):** 1684, 1378, 1335, 1319, 1280, 1204, 1139, 1078, 746, 686  $\text{cm}^{-1}$ .

Mp: 147-149  $^\circ\text{C}$

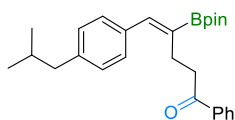

**(Z)-5-(4-Isobutylphenyl)-1-phenyl-4-(4,4,5,5-tetramethyl-1,3,2-dioxaborolan-2-yl)pent-4-en-1-one (3aa)**

The title compound was prepared from 1-(cyclopropylidenemethyl)-4-isobutylbenzene (37.2 mg, 0.2 mmol) and iodobenzene (39  $\mu$ L, 0.34 mmol), according to general borocarbonylation I (ring open). The crude residue was purified by flash chromatography (pentane/EA = 20:1,  $R_f$  = 0.35) to give the product as a colorless oil (46.0 mg, 55%).

$^1\text{H NMR}$  (300 MHz,  $\text{CDCl}_3$ )  $\delta$  7.93 – 7.86 (m, 2H), 7.47 – 7.39 (m, 1H), 7.37 – 7.29 (m, 2H), 7.19 – 7.15 (m, 2H), 7.14 (d,  $J$  = 1.7 Hz, 1H), 7.02 – 6.96 (m, 2H), 3.11 – 2.99 (m, 2H), 2.83 – 2.63 (m, 2H), 2.34 (d,  $J$  = 7.2 Hz, 2H), 1.74 (hept,  $J$  = 6.6 Hz, 1H), 1.20 (s, 12H), 0.78 (d,  $J$  = 6.6 Hz, 6H).

$^{13}\text{C NMR}$  (75 MHz,  $\text{CDCl}_3$ )  $\delta$  200.1, 143.3, 141.0, 136.9, 134.8, 132.8, 129.0, 128.8, 128.4, 128.2, 83.5, 45.2, 38.8, 30.1, 24.8, 22.4.

$^{11}\text{B NMR}$  (96 MHz,  $\text{CDCl}_3$ )  $\delta$  30.3.

**HRMS (ESI):** calcd for  $[\text{M}+\text{Na}]^+$   $\text{C}_{27}\text{H}_{35}\text{BO}_3$  440.2612, found: 440.2611.

**IR (ATR):** 2953, 1681, 1371, 1346, 1309, 1268, 1141, 688  $\text{cm}^{-1}$ .

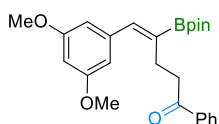

**(Z)-5-(3,5-Dimethoxyphenyl)-1-phenyl-4-(4,4,5,5-tetramethyl-1,3,2-dioxaborolan-2-yl)pent-4-en-1-one (3bb)**

The title compound was prepared from 1-(cyclopropylidenemethyl)-3,5-dimethoxybenzene (38 uL, 0.2 mmol) and iodobenzene (39 uL, 0.34 mmol), according to general borocarbonylation I (ring open). The crude residue was purified by flash chromatography (pentane/EA = 20:1,  $R_f$  = 0.15) to give the product as a yellow oil (73.2 mg, 87%).

**$^1\text{H}$  NMR (300 MHz,  $\text{CDCl}_3$ )**  $\delta$  8.05 – 7.92 (m, 2H), 7.59 – 7.49 (m, 1H), 7.48 – 7.39 (m, 2H), 7.24 (s, 1H), 6.49 (dd,  $J$  = 2.3, 0.7 Hz, 2H), 6.37 (t,  $J$  = 2.3 Hz, 1H), 3.76 (s, 6H), 3.25 – 3.06 (m, 2H), 2.91 – 2.73 (m, 2H), 1.32 (s, 12H).

**$^{13}\text{C}$  NMR (75 MHz,  $\text{CDCl}_3$ )**  $\delta$  200.0, 160.5, 143.2, 139.3, 136.8, 132.8, 128.4, 128.2, 106.7, 99.9, 83.6, 55.3, 38.9, 25.1, 24.8.

**$^{11}\text{B}$  NMR (128 MHz,  $\text{CDCl}_3$ )**  $\delta$  30.8.

**HRMS (ESI):** calcd for  $[\text{M}+\text{Na}]^+$   $\text{C}_{25}\text{H}_{31}\text{BO}_5$  444.2198, found: 444.2204.

**IR (ATR):** 1680, 1588, 1449, 1371, 1290, 1203, 1140, 1060, 967, 832, 747, 686  $\text{cm}^{-1}$ .

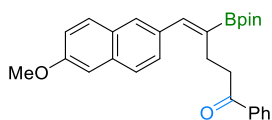

**(Z)-5-(6-Methoxynaphthalen-2-yl)-1-phenyl-4-(4,4,5,5-tetramethyl-1,3,2-dioxaborolan-2-yl)pent-4-en-1-one (3cc)**

The title compound was prepared from 2-(cyclopropylidenemethyl)-6-methoxynaphthalene (42.0 mg, 0.2 mmol) and iodobenzene (39 uL, 0.34 mmol), according to general borocarbonylation I (ring open). The crude residue was purified by flash chromatography (pentane/EA = 20:1,  $R_f$  = 0.15) to give the product as a colorless oil (55.1 mg, 62%).

**$^1\text{H}$  NMR (400 MHz,  $\text{CDCl}_3$ )**  $\delta$  7.99 (dd,  $J$  = 8.4, 1.3 Hz, 2H), 7.75 (s, 1H), 7.69 (dd,  $J$  = 8.8, 3.8 Hz, 2H), 7.56 – 7.50 (m, 1H), 7.48 – 7.38 (m, 4H), 7.16 – 7.08 (m, 2H), 3.92 (s, 3H), 3.24 – 3.14 (m, 2H), 2.97 – 2.87 (m, 2H), 1.34 (s, 12H).

**$^{13}\text{C}$  NMR (101 MHz,  $\text{CDCl}_3$ )**  $\delta$  200.1, 157.9, 143.3, 136.8, 133.7, 132.8, 132.8, 129.8, 128.7, 128.4, 128.2, 128.1, 127.5, 126.6, 118.9, 105.5, 83.5, 55.3, 38.8, 24.9, 24.8.

**$^{11}\text{B}$  NMR (128 MHz,  $\text{CDCl}_3$ )**  $\delta$  30.5.

**HRMS (ESI):** calcd for  $[\text{M}+\text{Na}]^+$   $\text{C}_{28}\text{H}_{31}\text{BO}_4$  464.2249, found: 464.2252.

**IR (ATR):** 1680, 1595, 1370, 1352, 1306, 1263, 1140, 849, 687  $\text{cm}^{-1}$ .

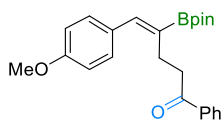

**(Z)-5-(4-Methoxyphenyl)-1-phenyl-4-(4,4,5,5-tetramethyl-1,3,2-dioxaborolan-2-yl)pent-4-en-1-one (3dd)**

The title compound was prepared from 1-(cyclopropylidenemethyl)-4-methoxybenzene (28 uL, 0.2 mmol) and iodobenzene (39 uL, 0.34 mmol), according to general borocarbonylation I (ring open). The crude residue was purified by flash chromatography (pentane/EA = 20:1, R<sub>f</sub> = 0.20) to give the product as a white solid (60.6 mg, 77%).

<sup>1</sup>H NMR (300 MHz, CDCl<sub>3</sub>) δ 8.04 – 7.97 (m, 2H), 7.58 – 7.50 (m, 1H), 7.48 – 7.40 (m, 2H), 7.35 – 7.28 (m, 2H), 7.24 (s, 1H), 6.90 – 6.83 (m, 2H), 3.80 (s, 3H), 3.20 – 3.12 (m, 2H), 2.90 – 2.78 (m, 2H), 1.31 (s, 12H).

<sup>13</sup>C NMR (75 MHz, CDCl<sub>3</sub>) δ 200.1, 158.8, 142.8, 136.9, 132.8, 130.5, 130.1, 128.4, 128.2, 113.7, 83.4, 55.2, 38.8, 24.8, 24.7.

<sup>11</sup>B NMR (96 MHz, CDCl<sub>3</sub>) δ 30.2.

HRMS (EI): calcd for [M] C<sub>24</sub>H<sub>29</sub>BO<sub>4</sub> 392.21534, found: 392.21632.

IR (ATR): 1681, 1602, 1508, 1347, 1248, 1175, 1140, 688 cm<sup>-1</sup>.

Mp: 62-63 °C

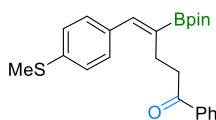

**(Z)-5-(4-(Methylthio)phenyl)-1-phenyl-4-(4,4,5,5-tetramethyl-1,3,2-dioxaborolan-2-yl)pent-4-en-1-one (3ee)**

The title compound was prepared from (4-(cyclopropylidenemethyl)phenyl)(methyl)sulfane (35.2 mg, 0.2 mmol) and iodobenzene (39 uL, 0.34 mmol), according to general borocarbonylation I (ring open). The crude residue was purified by flash chromatography (pentane/EA = 20:1, R<sub>f</sub> = 0.20) to give the product as a yellow oil (74.5 mg, 91%).

<sup>1</sup>H NMR (400 MHz, CDCl<sub>3</sub>) δ 8.02 – 7.93 (m, 2H), 7.57 – 7.51 (m, 1H), 7.44 (tt, J = 6.7, 1.4 Hz, 2H), 7.30 – 7.26 (m, 2H), 7.24 (s, 1H), 7.22 – 7.17 (m, 2H), 3.20 – 3.11 (m, 2H), 2.87 – 2.77 (m, 2H), 2.47 (s, 3H), 1.31 (s, 12H).

<sup>13</sup>C NMR (101 MHz, CDCl<sub>3</sub>) δ 200.0, 142.5, 137.7, 136.8, 134.1, 132.8, 129.4, 128.4, 128.2, 126.1, 83.5, 38.7, 24.8, 24.7, 15.5.

<sup>11</sup>B NMR (128 MHz, CDCl<sub>3</sub>) δ 30.6.

HRMS (ESI): calcd for [M+Na]<sup>+</sup> C<sub>24</sub>H<sub>29</sub>BO<sub>3</sub>S 430.1864, found: 430.1861.

IR (ATR): 1685, 1371, 1309, 1140, 1076, 964, 742, 685, 502 cm<sup>-1</sup>.



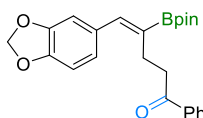

**(Z)-5-(Benzo[d][1,3]dioxol-5-yl)-1-phenyl-4-(4,4,5,5-tetramethyl-1,3,2-dioxaborolan-2-yl)pent-4-en-1-one (3ff)**

The title compound was prepared from 5-(cyclopropylidenemethyl)benzo[d][1,3]dioxole (34.8 mg, 0.2 mmol) and iodobenzene (39  $\mu$ L, 0.34 mmol), according to general borocarbonylation I (ring open). The crude residue was purified by flash chromatography (pentane/EA = 20:1,  $R_f$  = 0.20) to give the product as a colorless oil (62.9 mg, 77%).

$^1\text{H NMR}$  (300 MHz,  $\text{CDCl}_3$ )  $\delta$  8.06 – 7.93 (m, 2H), 7.60 – 7.51 (m, 1H), 7.48 – 7.40 (m, 2H), 7.20 (s, 1H), 6.89 – 6.73 (m, 3H), 5.94 (s, 2H), 3.23 – 3.06 (m, 2H), 2.87 – 2.75 (m, 2H), 1.30 (s, 12H).

$^{13}\text{C NMR}$  (75 MHz,  $\text{CDCl}_3$ )  $\delta$  200.0, 147.5, 146.8, 142.8, 136.9, 132.8, 131.6, 128.4, 128.2, 123.1, 109.1, 108.2, 101.0, 83.5, 38.7, 24.8, 24.7.

$^{11}\text{B NMR}$  (96 MHz,  $\text{CDCl}_3$ )  $\delta$  30.1.

**HRMS (ESI):** calcd for  $[\text{M}+\text{Na}]^+$   $\text{C}_{24}\text{H}_{27}\text{BO}_5$  428.1885, found: 428.1887.

**IR (ATR):** 1681, 1487, 1444, 1358, 1307, 1235, 1203, 1141, 1101, 1036, 926, 744, 688  $\text{cm}^{-1}$ .

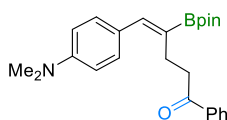

**(Z)-5-(4-(dimethylamino)phenyl)-1-phenyl-4-(4,4,5,5-tetramethyl-1,3,2-dioxaborolan-2-yl)pent-4-en-1-one (3gg)**

The title compound was prepared from 4-(cyclopropylidenemethyl)-*N,N*-dimethylaniline (34.6 mg, 0.2 mmol) and iodobenzene (39  $\mu$ L, 0.34 mmol), according to general borocarbonylation I (ring open). The crude residue was purified by flash chromatography (pentane/EA = 10:1,  $R_f$  = 0.30) to give the product as a yellow oil (32.4 mg, 40%).

$^1\text{H NMR}$  (300 MHz,  $\text{CDCl}_3$ )  $\delta$  8.13 – 7.96 (m, 2H), 7.61 – 7.49 (m, 1H), 7.49 – 7.41 (m, 2H), 7.36 – 7.30 (m, 2H), 7.20 (s, 1H), 6.68 (d,  $J$  = 9.0 Hz, 2H), 3.23 – 3.12 (m, 2H), 2.96 (s, 6H), 2.91 – 2.84 (m, 2H), 1.31 (s, 12H).

$^{13}\text{C NMR}$  (101 MHz,  $\text{CDCl}_3$ )  $\delta$  200.4, 149.6, 143.3, 137.0, 132.7, 130.6, 128.5, 128.4, 128.3, 111.9, 83.3, 40.3, 38.8, 24.9, 24.8.

$^{11}\text{B NMR}$  (128 MHz,  $\text{CDCl}_3$ )  $\delta$  30.6.

**HRMS (ESI):** calcd for  $[\text{M}+\text{Na}]^+$   $\text{C}_{25}\text{H}_{32}\text{BNO}_3$  427.2408, found: 427.2414.

**IR (ATR):** 1682, 1595, 1519, 1348, 1163, 1141, 946, 815, 747, 689  $\text{cm}^{-1}$ .

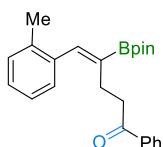

**(Z)-1-Phenyl-4-(4,4,5,5-tetramethyl-1,3,2-dioxaborolan-2-yl)-5-(o-tolyl)pent-4-en-1-one (3hh)**

The title compound was prepared from 1-(cyclopropylidene)methyl-2-methylbenzene (32 uL, 0.2 mmol) and iodobenzene (39 uL, 0.34 mmol), according to general borocarbonylation I (ring open). The crude residue was purified by flash chromatography (pentane/EA = 20:1,  $R_f$  = 0.33) to give the product as a colorless oil (49.2 mg, 66%).

**$^1\text{H}$  NMR (300 MHz,  $\text{CDCl}_3$ )**  $\delta$  7.98 – 7.85 (m, 2H), 7.56 – 7.48 (m, 1H), 7.44 – 7.37 (m, 2H), 7.35 (s, 1H), 7.20 – 7.10 (m, 4H), 3.11 – 2.98 (m, 2H), 2.70 – 2.56 (m, 2H), 2.26 (s, 3H), 1.33 (s, 12H).

**$^{13}\text{C}$  NMR (75 MHz,  $\text{CDCl}_3$ )**  $\delta$  200.0, 143.3, 137.0, 136.8, 136.0, 132.7, 129.8, 128.5, 128.4, 128.2, 127.2, 125.4, 83.5, 39.0, 25.0, 24.8, 19.9.

**$^{11}\text{B}$  NMR (96 MHz,  $\text{CDCl}_3$ )**  $\delta$  30.3.

**HRMS (ESI):** calcd for  $[\text{M}+\text{Na}]^+$   $\text{C}_{24}\text{H}_{29}\text{BO}_3$  398.2143, found: 398.2147.

**IR (ATR):** 1683, 1370, 1330, 1312, 1284, 1139, 1080, 744, 684  $\text{cm}^{-1}$ .

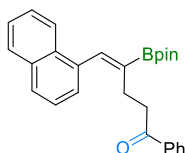

**(Z)-5-(Naphthalen-1-yl)-1-phenyl-4-(4,4,5,5-tetramethyl-1,3,2-dioxaborolan-2-yl)pent-4-en-1-one (3ii)**

The title compound was prepared from 1-(cyclopropylidene)methylnaphthalene (36.0 mg, 0.2 mmol) and iodobenzene (39 uL, 0.34 mmol), according to general borocarbonylation I (ring open). The crude residue was purified by flash chromatography (pentane/EA = 20:1,  $R_f$  = 0.20) to give the product as a colorless oil (32.0 mg, 39%).

**$^1\text{H}$  NMR (300 MHz,  $\text{CDCl}_3$ )**  $\delta$  8.00 – 7.94 (m, 1H), 7.88 – 7.75 (m, 5H), 7.52 – 7.45 (m, 3H), 7.42 (d,  $J$  = 8.5 Hz, 1H), 7.37 – 7.30 (m, 3H), 3.11 – 2.97 (m, 2H), 2.71 – 2.54 (m, 2H), 1.37 (s, 12H).

**$^{13}\text{C}$  NMR (75 MHz,  $\text{CDCl}_3$ )**  $\delta$  200.0, 142.2, 136.7, 135.0, 133.5, 132.6, 131.5, 128.3, 128.3, 128.1, 127.6, 125.9, 125.8, 125.8, 125.3, 125.2, 83.6, 39.1, 25.4, 24.9.

**$^{11}\text{B}$  NMR (96 MHz,  $\text{CDCl}_3$ )**  $\delta$  29.9.

**HRMS (ESI):** calcd for  $[\text{M}+\text{Na}]^+$   $\text{C}_{27}\text{H}_{29}\text{BO}_3$  434.2143, found: 434.2145.

**IR (ATR):** 1679, 1370, 1350, 1309, 1263, 1139, 781, 741, 687  $\text{cm}^{-1}$ .

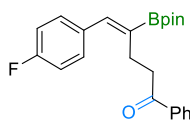

**(Z)-5-(4-Fluorophenyl)-1-phenyl-4-(4,4,5,5-tetramethyl-1,3,2-dioxaborolan-2-yl)pent-4-en-1-one (3jj)**

The title compound was prepared from 1-(cyclopropylidene)methyl-4-fluorobenzene (28  $\mu$ L, 0.2 mmol) and iodobenzene (39  $\mu$ L, 0.34 mmol), according to general borocarbonylation I (ring open). The crude residue was purified by flash chromatography (pentane/EA = 20:1,  $R_f$  = 0.35) to give the product as a colorless oil (64.1 mg, 84%).

$^1\text{H NMR}$  (300 MHz,  $\text{CDCl}_3$ )  $\delta$  8.06 – 7.90 (m, 2H), 7.59 – 7.51 (m, 1H), 7.49 – 7.40 (m, 2H), 7.34 – 7.24 (m, 3H), 7.07 – 6.95 (m, 2H), 3.25 – 3.08 (m, 2H), 2.79 (dd,  $J$  = 8.8, 6.4 Hz, 2H), 1.31 (s, 12H).

$^{13}\text{C NMR}$  (75 MHz,  $\text{CDCl}_3$ )  $\delta$  199.9, 161.9 (d,  $J$  = 247.1 Hz), 142.0, 136.8, 133.5 (d,  $J$  = 3.3 Hz), 132.9, 130.6 (d,  $J$  = 8.1 Hz), 128.5, 128.2, 115.2 (d,  $J$  = 21.2 Hz), 83.6, 38.6, 24.8, 24.6.

$^{11}\text{B NMR}$  (128 MHz,  $\text{CDCl}_3$ )  $\delta$  30.5.

$^{19}\text{F NMR}$  (282 MHz,  $\text{CDCl}_3$ )  $\delta$  -114.31 (ddd,  $J$  = 14.5, 9.2, 5.3 Hz).

**HRMS (ESI):** calcd for  $[\text{M}+\text{Na}]^+$   $\text{C}_{23}\text{H}_{26}\text{BFO}_3$  402.1892, found: 402.1896.

**IR (ATR):** 1686, 1505, 1344, 1312, 1203, 1140, 1024, 742, 687, 524  $\text{cm}^{-1}$ .

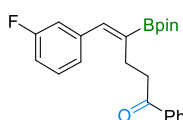

**(Z)-5-(3-Fluorophenyl)-1-phenyl-4-(4,4,5,5-tetramethyl-1,3,2-dioxaborolan-2-yl)pent-4-en-1-one (3kk)**

The title compound was prepared from 1-(cyclopropylidene)methyl-3-fluorobenzene (28  $\mu$ L, 0.2 mmol) and iodobenzene (39  $\mu$ L, 0.34 mmol), according to general borocarbonylation I (ring open). The crude residue was purified by flash chromatography (pentane/EA = 20:1,  $R_f$  = 0.35) to give the product as a colorless oil (53.5 mg, 70%).

$^1\text{H NMR}$  (300 MHz,  $\text{CDCl}_3$ )  $\delta$  7.85 – 7.70 (m, 2H), 7.39 – 7.30 (m, 1H), 7.24 (ddt,  $J$  = 8.3, 6.8, 1.2 Hz, 2H), 7.13 – 7.03 (m, 2H), 6.90 (ddd,  $J$  = 8.4, 1.7, 0.9 Hz, 1H), 6.85 – 6.78 (m, 1H), 6.77 – 6.69 (m, 1H), 3.00 – 2.91 (m, 2H), 2.65 – 2.55 (m, 2H), 1.12 (s, 12H).

$^{13}\text{C NMR}$  (75 MHz,  $\text{CDCl}_3$ )  $\delta$  199.8, 162.63 (d,  $J$  = 245.4 Hz), 141.8 (d,  $J$  = 2.4 Hz), 139.7 (d,  $J$  = 7.4 Hz), 136.8, 132.8, 129.7 (d,  $J$  = 8.4 Hz), 128.5, 128.2, 124.5 (d,  $J$  = 2.7 Hz), 115.6 (d,  $J$  = 21.5 Hz), 114.1 (d,  $J$  = 21.2 Hz), 83.7, 38.6, 24.8, 24.7.

$^{11}\text{B NMR}$  (96 MHz,  $\text{CDCl}_3$ )  $\delta$  30.0.

**HRMS (ESI):** calcd for  $[\text{M}+\text{Na}]^+$   $\text{C}_{23}\text{H}_{26}\text{BFO}_3$  402.1892, found: 402.1901.

**IR (ATR):** 2976, 1682, 1579, 1371, 1341, 1313, 1270, 1248, 1204, 1139, 1081, 964, 784, 743, 687  $\text{cm}^{-1}$ .

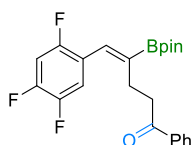

**(Z)-1-Phenyl-4-(4,4,5,5-tetramethyl-1,3,2-dioxaborolan-2-yl)-5-(2,4,5-trifluorophenyl)pent-4-en-1-one (3ll)**

The title compound was prepared from 1-(cyclopropylidenemethyl)-2,4,5-trifluorobenzene (36.8 mg, 0.2 mmol) and iodobenzene (39  $\mu$ L, 0.34 mmol), according to general borocarbonylation I (ring open). The crude residue was purified by flash chromatography (pentane/EA = 20:1,  $R_f$  = 0.35) to give the product as a colorless oil (58.0 mg, 70%).

$^1\text{H NMR}$  (400 MHz,  $\text{CDCl}_3$ )  $\delta$  7.99 – 7.93 (m, 2H), 7.57 – 7.52 (m, 1H), 7.47 – 7.41 (m, 2H), 7.16 – 7.05 (m, 2H), 6.90 (ddd,  $J$  = 10.3, 9.1, 6.7 Hz, 1H), 3.18 – 3.10 (m, 2H), 2.71 – 2.60 (m, 2H), 1.31 (s, 12H).

$^{13}\text{C NMR}$  (101 MHz,  $\text{CDCl}_3$ )  $\delta$  199.7, 154.9 (ddd,  $J$  = 246.7, 9.4, 2.0 Hz), 149.4 (ddd,  $J$  = 251.8, 14.4, 12.6 Hz), 146.4 (ddd,  $J$  = 245.0, 12.5, 3.9 Hz), 136.8, 133.8, 132.9, 128.5, 128.1, 121.5 (d,  $J$  = 18.0 Hz), 117.9 (dd,  $J$  = 19.3, 4.9 Hz), 105.6 (dd,  $J$  = 28.7, 20.6 Hz), 83.9, 38.1, 25.2, 24.8.

$^{11}\text{B NMR}$  (128 MHz,  $\text{CDCl}_3$ )  $\delta$  30.5.

**HRMS (ESI):** calcd for  $[\text{M}+\text{Na}]^+$   $\text{C}_{23}\text{H}_{24}\text{BF}_3\text{O}_3$  438.1704, found: 438.1712.

**IR (ATR):** 1683, 1504, 1372, 1312, 1268, 1200, 1141, 1078, 843, 744, 688  $\text{cm}^{-1}$ .

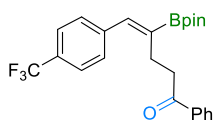

**(Z)-1-Phenyl-4-(4,4,5,5-tetramethyl-1,3,2-dioxaborolan-2-yl)-5-(4-(trifluoromethyl)phenyl)pent-4-en-1-one (3mm)**

The title compound was prepared from 1-(cyclopropylidenemethyl)-4-(trifluoromethyl)benzene (35  $\mu$ L, 0.2 mmol) and iodobenzene (39  $\mu$ L, 0.34 mmol), according to general borocarbonylation I (ring open). The crude residue was purified by flash chromatography (pentane/EA = 20:1,  $R_f$  = 0.35) to give the product as a colorless oil (54.0 mg, 63%).

$^1\text{H NMR}$  (400 MHz,  $\text{CDCl}_3$ )  $\delta$  7.99 – 7.93 (m, 2H), 7.60 – 7.52 (m, 3H), 7.46 – 7.39 (m, 4H), 7.31 (s, 1H), 3.20 – 3.10 (m, 2H), 2.86 – 2.75 (m, 2H), 1.32 (s, 12H).

$^{13}\text{C NMR}$  (101 MHz,  $\text{CDCl}_3$ )  $\delta$  199.7, 141.6, 141.0, 136.7, 132.9, 129.1 (q,  $J$  = 32.3 Hz), 129.0, 128.5, 128.1, 125.2 (q,  $J$  = 4.0 Hz), 124.1 (q,  $J$  = 272.0 Hz), 83.8, 38.5, 24.8, 24.7.

$^{11}\text{B NMR}$  (128 MHz,  $\text{CDCl}_3$ )  $\delta$  30.6.

$^{19}\text{F NMR}$  (376 MHz,  $\text{CDCl}_3$ )  $\delta$  -62.5.

**HRMS (EI):** calcd for  $[\text{M}]$   $\text{C}_{24}\text{H}_{26}\text{BF}_3\text{O}_3$  430.19216, found: 430.19251.

**IR (ATR):** 1683, 1372, 1320, 1268, 1163, 1141, 1121, 1065, 1016, 962, 833, 743, 688, 596  $\text{cm}^{-1}$ .

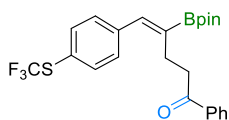

**(Z)-1-Phenyl-4-(4,4,5,5-tetramethyl-1,3,2-dioxaborolan-2-yl)-5-(4-(trifluoromethyl)thio)phenylpent-4-en-1-one (3m)**

The title compound was prepared from 4-(cyclopropylidenemethyl)phenyl(trifluoromethyl)sulfane (46.0 mg, 0.2 mmol) and iodobenzene (39  $\mu$ L, 0.34 mmol), according to general borocarbonylation I (ring open). The crude residue was purified by flash chromatography (pentane/EA = 20:1, R<sub>f</sub> = 0.35) to give the product as a colorless oil (60.1 mg, 65%).

<sup>1</sup>H NMR (400 MHz, CDCl<sub>3</sub>)  $\delta$  8.00 – 7.94 (m, 2H), 7.60 (d, *J* = 8.2 Hz, 2H), 7.57 – 7.52 (m, 1H), 7.44 (tt, *J* = 7.7, 1.8 Hz, 2H), 7.38 – 7.33 (m, 2H), 7.28 (s, 1H), 3.20 – 3.12 (m, 2H), 2.80 (dd, *J* = 8.9, 7.0 Hz, 2H), 1.32 (s, 12H).

<sup>13</sup>C NMR (101 MHz, CDCl<sub>3</sub>)  $\delta$  199.7, 141.5, 140.1, 136.7, 136.1, 132.9, 129.8, 129.5 (q, *J* = 308.3 Hz), 128.5, 128.1, 122.9 (q, *J* = 2.2 Hz), 83.8, 38.5, 24.8, 24.7.

<sup>11</sup>B NMR (128 MHz, CDCl<sub>3</sub>)  $\delta$  30.8.

<sup>19</sup>F NMR (376 MHz, CDCl<sub>3</sub>)  $\delta$  -42.6.

HRMS (EI): calcd for [M] C<sub>24</sub>H<sub>26</sub>BF<sub>3</sub>O<sub>3</sub>S 462.16423, found: 462.16553.

IR (ATR): 1683, 1372, 1342, 1314, 1266, 1112, 1083, 962, 744, 688 cm<sup>-1</sup>.

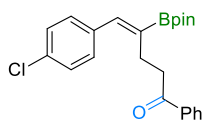

**(Z)-5-(4-Chlorophenyl)-1-phenyl-4-(4,4,5,5-tetramethyl-1,3,2-dioxaborolan-2-yl)pent-4-en-1-one (3oo)**

The title compound was prepared from 1-chloro-4-(cyclopropylidenemethyl)benzene (32.8 mg, 0.2 mmol) and iodobenzene (39  $\mu$ L, 0.34 mmol), according to general borocarbonylation I (ring open). The crude residue was purified by flash chromatography (pentane/EA = 20:1, R<sub>f</sub> = 0.35) to give the product as a colorless oil (58.4 mg, 74%).

<sup>1</sup>H NMR (300 MHz, CDCl<sub>3</sub>)  $\delta$  7.90 – 7.75 (m, 2H), 7.44 – 7.37 (m, 1H), 7.33 – 7.26 (m, 2H), 7.17 – 7.08 (m, 5H), 3.05 – 2.92 (m, 2H), 2.71 – 2.58 (m, 2H), 1.16 (s, 12H).

<sup>13</sup>C NMR (75 MHz, CDCl<sub>3</sub>)  $\delta$  199.8, 141.8, 136.8, 135.8, 133.1, 132.9, 130.2, 128.5, 128.4, 128.2, 83.7, 38.6, 24.8, 24.6.

<sup>11</sup>B NMR (96 MHz, CDCl<sub>3</sub>)  $\delta$  30.2.

HRMS (ESI): calcd for [M+Na]<sup>+</sup> C<sub>23</sub>H<sub>26</sub>BClO<sub>3</sub> 418.1597, found: 418.1600.

IR (ATR): 2974, 1683, 1370, 1339, 1314, 1281, 1137, 1091, 1076, 812, 746, 686, 501 cm<sup>-1</sup>.

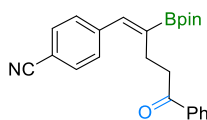

**(Z)-4-(5-Oxo-5-phenyl-2-(4,4,5,5-tetramethyl-1,3,2-dioxaborolan-2-yl)pent-1-en-1-yl)benzonitrile (3pp)**

The title compound was prepared from 4-(cyclopropylidenemethyl)benzonitrile (31.0 mg, 0.2 mmol) and iodobenzene (39  $\mu$ L, 0.34 mmol), according to general borocarbonylation I (ring open). The crude residue was purified by flash chromatography (pentane/EA = 10:1,  $R_f$  = 0.20) to give the product as a white solid (37.4 mg, 48%).

$^1\text{H NMR}$  (300 MHz,  $\text{CDCl}_3$ )  $\delta$  8.04 – 7.89 (m, 2H), 7.64 – 7.57 (m, 2H), 7.57 – 7.51 (m, 1H), 7.47 – 7.37 (m, 4H), 7.26 (d,  $J$  = 1.7 Hz, 1H), 3.21 – 3.07 (m, 2H), 2.83 – 2.71 (m, 2H), 1.31 (s, 12H).

$^{13}\text{C NMR}$  (75 MHz,  $\text{CDCl}_3$ )  $\delta$  199.5, 142.1, 141.0, 136.7, 133.0, 132.0, 129.4, 128.5, 128.1, 118.9, 110.7, 83.9, 38.3, 24.8, 24.7.

$^{11}\text{B NMR}$  (96 MHz,  $\text{CDCl}_3$ )  $\delta$  30.0.

$^{19}\text{F NMR}$  (376 MHz,  $\text{CDCl}_3$ )  $\delta$  -115.16 (ddt,  $J$  = 15.0, 10.9, 4.8 Hz), -134.23 (dtd,  $J$  = 22.5, 9.5, 4.4 Hz), -142.80 (dddd,  $J$  = 21.8, 14.3, 10.9, 6.8 Hz).

**HRMS (ESI):** calcd for  $[\text{M}+\text{H}]^+$   $\text{C}_{24}\text{H}_{26}\text{BNO}_3$  387.2120, found: 387.2122.

**IR (ATR):** 2222, 1678, 1088, 853, 745, 688, 553  $\text{cm}^{-1}$ .

decomposition: 177  $^\circ\text{C}$

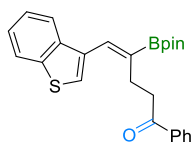

**(Z)-5-(Benzo[b]thiophen-3-yl)-1-phenyl-4-(4,4,5,5-tetramethyl-1,3,2-dioxaborolan-2-yl)pent-4-en-1-one (3qq)**

The title compound was prepared from 3-(cyclopropylidenemethyl)benzo[b]thiophene (37.2 mg, 0.2 mmol) and iodobenzene (39  $\mu$ L, 0.34 mmol), according to general borocarbonylation I (ring open). The crude residue was purified by flash chromatography (pentane/EA = 20:1,  $R_f$  = 0.20) to give the product as a colorless oil (76.1 mg, 90%).

$^1\text{H NMR}$  (400 MHz,  $\text{CDCl}_3$ )  $\delta$  7.96 (dd,  $J$  = 8.4, 1.3 Hz, 2H), 7.90 – 7.81 (m, 2H), 7.57 – 7.51 (m, 1H), 7.48 (d,  $J$  = 3.1 Hz, 2H), 7.45 – 7.33 (m, 4H), 3.29 – 3.09 (m, 2H), 2.97 – 2.79 (m, 2H), 1.34 (s, 12H).

$^{13}\text{C NMR}$  (101 MHz,  $\text{CDCl}_3$ )  $\delta$  200.0, 139.5, 139.0, 136.8, 134.8, 132.8, 132.5, 128.4, 128.2, 124.6, 124.4, 124.1, 122.5, 122.3, 83.6, 38.6, 25.8, 24.8.

$^{11}\text{B NMR}$  (128 MHz,  $\text{CDCl}_3$ )  $\delta$  30.9.

**HRMS (ESI):** calcd for  $[\text{M}+\text{Na}]^+$   $\text{C}_{25}\text{H}_{27}\text{BO}_3\text{S}$  440.1707, found: 440.1707.

**IR (ATR):** 1687, 1355, 1315, 1136, 760, 744, 732, 688, 678, 667  $\text{cm}^{-1}$ .

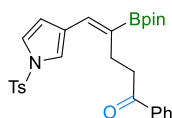

**(Z)-1-Phenyl-4-(4,4,5,5-tetramethyl-1,3,2-dioxaborolan-2-yl)-5-(1-tosyl-1H-pyrrol-3-yl)pent-4-en-1-one (3rr)**

The title compound was prepared from 3-(cyclopropylidenemethyl)-1-tosyl-1*H*-pyrrole (54.6 mg, 0.2 mmol) and iodobenzene (39  $\mu$ L, 0.34 mmol), according to general borocarbonylation I (ring open). The crude residue was purified by flash chromatography (pentane/EA = 10:1,  $R_f$  = 0.30) to give the product as a yellow oil (94.8 mg, 94%).

$^1\text{H NMR}$  (300 MHz,  $\text{CDCl}_3$ )  $\delta$  8.00 – 7.87 (m, 2H), 7.80 – 7.66 (m, 2H), 7.60 – 7.48 (m, 2H), 7.48 – 7.36 (m, 3H), 7.23 (dd,  $J$  = 8.7, 0.7 Hz, 2H), 6.43 – 6.31 (m, 1H), 6.25 (td,  $J$  = 3.4, 0.6 Hz, 1H), 2.99 – 2.88 (m, 2H), 2.66 – 2.54 (m, 2H), 2.35 (s, 3H), 1.31 (s, 12H).

$^{13}\text{C NMR}$  (75 MHz,  $\text{CDCl}_3$ )  $\delta$  199.8, 144.9, 136.7, 135.8, 132.8, 130.9, 130.6, 129.6, 128.4, 128.1, 127.5, 123.1, 116.2, 111.8, 83.5, 37.8, 25.0, 24.8, 21.6.

$^{11}\text{B NMR}$  (96 MHz,  $\text{CDCl}_3$ )  $\delta$  30.6.

**HRMS (EI):** calcd for [M]  $\text{C}_{28}\text{H}_{32}\text{BNO}_5\text{S}$  505.20888, found: 505.20969.

**IR (ATR):** 1681, 1596, 1348, 1172, 1141, 1088, 733, 689, 669, 586, 542  $\text{cm}^{-1}$ .

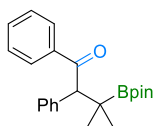

**1,2-Diphenyl-2-(1-(4,4,5,5-tetramethyl-1,3,2-dioxaborolan-2-yl)cyclopropyl)ethan-1-one (4a)**

The title compound was prepared from (cyclopropylidenemethyl)benzene (27  $\mu$ L, 0.2 mmol) and iodobenzene (34  $\mu$ L, 0.3 mmol), according to general borocarbonylation II (ring close). The crude residue was purified by flash chromatography (pentane/EA = 20:1,  $R_f$  = 0.36) to give the product as a white solid (44.9 mg, 62%). X-ray (single-crystal) colorless block crystals of X-ray diffraction quality were obtained by slow evaporation of saturated solution of **4a** in ethyl acetate/*n*-pentane (CCDC 2122869).

$^1\text{H NMR}$  (300 MHz,  $\text{CDCl}_3$ )  $\delta$  7.77 – 7.69 (m, 2H), 7.31 – 7.24 (m, 1H), 7.21 – 7.14 (m, 2H), 7.13 – 7.08 (m, 2H), 7.04 (tt,  $J$  = 8.0, 1.7 Hz, 3H), 4.78 (s, 1H), 1.07 (s, 6H), 1.01 (s, 6H), 0.74 (ddd,  $J$  = 8.8, 5.9, 4.1 Hz, 1H), 0.40 (ddd,  $J$  = 8.8, 5.7, 3.7 Hz, 1H), 0.28 – 0.20 (m, 1H), 0.06 – 0.05 (m, 1H).

$^{13}\text{C NMR}$  (75 MHz,  $\text{CDCl}_3$ )  $\delta$  200.6, 137.3, 136.1, 132.1, 130.1, 128.7, 128.2, 128.1, 126.9, 83.1, 56.0, 24.7, 24.1, 6.5, 6.3.

$^{11}\text{B NMR}$  (96 MHz,  $\text{CDCl}_3$ )  $\delta$  33.3.

**HRMS (EI):** calcd for [M]  $\text{C}_{23}\text{H}_{27}\text{BO}_3$  362.20478, found: 362.20569.

**IR (ATR):** 2977, 1677, 1409, 1314, 1244, 1219, 1135, 961, 845, 749, 710, 695, 684, 627  $\text{cm}^{-1}$ .

Mp: 101-102  $^\circ\text{C}$

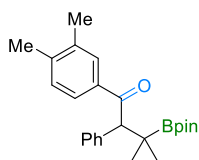

**1-(3,4-Dimethylphenyl)-2-phenyl-2-(1-(4,4,5,5-tetramethyl-1,3,2-dioxaborolan-2-yl)cyclopropyl)ethan-1-one (4b)**

The title compound was prepared from (cyclopropylidenemethyl)benzene (27  $\mu$ L, 0.2 mmol) and 4-iodo-1,2-dimethylbenzene (42  $\mu$ L, 0.3 mmol), according to general borocarbonylation II (ring close). The crude residue was purified by flash chromatography (pentane/EA = 20:1,  $R_f$  = 0.33) to give the product as a white solid (44.3 mg, 57%).

$^1\text{H NMR}$  (300 MHz,  $\text{CDCl}_3$ )  $\delta$  7.66 (d,  $J$  = 1.9 Hz, 1H), 7.57 (dd,  $J$  = 8.0, 1.8 Hz, 1H), 7.26 – 7.19 (m, 2H), 7.19 – 7.11 (m, 3H), 7.04 (d,  $J$  = 8.0 Hz, 1H), 4.86 (s, 1H), 2.22 (s, 6H), 1.19 (s, 6H), 1.14 (s, 6H), 0.84 (ddd,  $J$  = 8.8, 5.9, 4.1 Hz, 1H), 0.51 (ddd,  $J$  = 8.8, 5.6, 3.7 Hz, 1H), 0.39 – 0.28 (m, 1H), 0.18 – 0.06 (m, 1H).

$^{13}\text{C NMR}$  (75 MHz,  $\text{CDCl}_3$ )  $\delta$  200.3, 141.5, 136.6, 136.4, 135.1, 130.1, 130.0, 129.4, 128.2, 126.8, 126.6, 83.1, 56.0, 24.7, 24.2, 19.9, 19.7, 6.6, 6.4.

$^{11}\text{B NMR}$  (96 MHz,  $\text{CDCl}_3$ )  $\delta$  32.9.

**HRMS (EI):** calcd for [M]  $\text{C}_{25}\text{H}_{31}\text{BO}_3$  390.23608, found: 390.23642.

**IR (ATR):** 1671, 1406, 1316, 1241, 1134, 977, 965, 864, 704, 670  $\text{cm}^{-1}$ .

Mp: 107-109  $^\circ\text{C}$

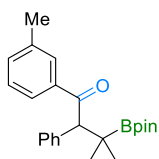

**2-Phenyl-2-(1-(4,4,5,5-tetramethyl-1,3,2-dioxaborolan-2-yl)cyclopropyl)-1-(*m*-tolyl)ethan-1-one (4c)**

The title compound was prepared from (cyclopropylidenemethyl)benzene (27  $\mu$ L, 0.2 mmol) and 1-iodo-3-methylbenzene (39  $\mu$ L, 0.3 mmol), according to general borocarbonylation II (ring close). The crude residue was purified by flash chromatography (pentane/EA = 20:1,  $R_f$  = 0.36) to give the product as a white solid (53.7 mg, 71%).

$^1\text{H NMR}$  (300 MHz,  $\text{CDCl}_3$ )  $\delta$  7.68 (ddt,  $J$  = 1.8, 1.4, 0.7 Hz, 1H), 7.66 – 7.58 (m, 1H), 7.27 – 7.11 (m, 7H), 4.87 (s, 1H), 2.31 (d,  $J$  = 0.6 Hz, 3H), 1.19 (s, 6H), 1.14 (s, 6H), 0.84 (ddd,  $J$  = 8.9, 5.9, 4.2 Hz, 1H), 0.51 (ddd,  $J$  = 8.8, 5.6, 3.7 Hz, 1H), 0.40 – 0.28 (m, 1H), 0.17 – 0.07 (m, 1H).

$^{13}\text{C NMR}$  (75 MHz,  $\text{CDCl}_3$ )  $\delta$  200.8, 137.8, 137.4, 136.3, 132.9, 130.1, 129.3, 128.2, 128.0, 126.9, 126.1, 83.2, 56.1, 24.8, 24.2, 21.3, 6.6, 6.4.

$^{11}\text{B NMR}$  (96 MHz,  $\text{CDCl}_3$ )  $\delta$  33.0.

**HRMS (EI):** calcd for [M]  $\text{C}_{24}\text{H}_{29}\text{BO}_3$  376.22043, found: 376.22110.



**IR (ATR):** 2964, 2922, 1674, 1408, 1313, 1250, 1156, 1136, 964, 703, 679  $\text{cm}^{-1}$ .

**Mp:** 100-101  $^{\circ}\text{C}$

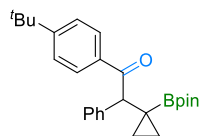

**1-(4-(*tert*-Butyl)phenyl)-2-phenyl-2-(1-(4,4,5,5-tetramethyl-1,3,2-dioxaborolan-2-yl)cyclopropyl)ethan-1-one (4d)**

The title compound was prepared from (cyclopropylidene)methylbenzene (27  $\mu\text{L}$ , 0.2 mmol) and 1-(*tert*-butyl)-4-iodobenzene (53  $\mu\text{L}$ , 0.3 mmol), according to general borocarbonylation II (ring close). The crude residue was purified by flash chromatography (pentane/EA = 20:1,  $R_f$  = 0.40) to give the product as a white solid (57.0 mg, 68%).

**$^1\text{H}$  NMR (400 MHz,  $\text{CDCl}_3$ )**  $\delta$  7.84 – 7.74 (m, 2H), 7.34 – 7.29 (m, 2H), 7.27 – 7.21 (m, 2H), 7.20 – 7.12 (m, 3H), 4.84 (s, 1H), 1.27 (s, 9H), 1.19 (s, 6H), 1.13 (s, 6H), 0.83 (ddd,  $J$  = 8.8, 5.9, 4.2 Hz, 1H), 0.57 – 0.46 (m, 1H), 0.37 – 0.29 (m, 1H), 0.17 – 0.08 (m, 1H).

**$^{13}\text{C}$  NMR (101 MHz,  $\text{CDCl}_3$ )**  $\delta$  200.1, 155.6, 136.6, 134.6, 130.1, 128.8, 128.2, 126.8, 125.1, 83.1, 56.2, 34.9, 31.0, 24.7, 24.2, 6.6, 6.3.

**$^{11}\text{B}$  NMR (128 MHz,  $\text{CDCl}_3$ )**  $\delta$  33.4.

**HRMS (EI):** calcd for [M]  $\text{C}_{27}\text{H}_{35}\text{BO}_3$  418.26738, found: 418.26713.

**IR (ATR):** 2961, 1689, 1410, 1326, 1138, 971, 962, 705, 669, 556  $\text{cm}^{-1}$ .

**Mp:** 129-131  $^{\circ}\text{C}$

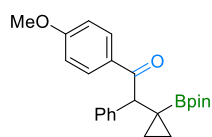

**1-(4-Methoxyphenyl)-2-phenyl-2-(1-(4,4,5,5-tetramethyl-1,3,2-dioxaborolan-2-yl)cyclopropyl)ethan-1-one (4e)**

The title compound was prepared from (cyclopropylidene)methylbenzene (27  $\mu\text{L}$ , 0.2 mmol) and 1-iodo-4-methoxybenzene (70.2 mg, 0.3 mmol), according to general borocarbonylation II (ring close). The crude residue was purified by flash chromatography (pentane/EA = 15:1,  $R_f$  = 0.31) to give the product as a white solid (51.9 mg, 66%).

**$^1\text{H}$  NMR (300 MHz,  $\text{CDCl}_3$ )**  $\delta$  7.87 – 7.80 (m, 2H), 7.26 – 7.20 (m, 2H), 7.20 – 7.10 (m, 3H), 6.84 – 6.72 (m, 2H), 4.83 (s, 1H), 3.79 (s, 3H), 1.19 (s, 6H), 1.13 (s, 6H), 0.83 (ddd,  $J$  = 8.8, 5.9, 4.1 Hz, 1H), 0.58 – 0.44 (m, 1H), 0.40 – 0.25 (m, 1H), 0.18 – 0.02 (m, 1H).

**$^{13}\text{C}$  NMR (75 MHz,  $\text{CDCl}_3$ )**  $\delta$  199.0, 162.7, 136.7, 131.1, 130.2, 130.1, 128.2, 126.8, 113.3, 83.1, 55.9, 55.3, 24.8, 24.1, 6.5, 6.3.

**$^{11}\text{B}$  NMR (96 MHz,  $\text{CDCl}_3$ )**  $\delta$  30.3.

**HRMS (EI):** calcd for [M] C<sub>24</sub>H<sub>29</sub>BO<sub>4</sub> 392.21534, found: 392.21566.

**IR (ATR):** 1668, 1602, 1406, 1307, 1250, 1176, 1134, 1029, 709 cm<sup>-1</sup>.

Mp: 113-114 °C

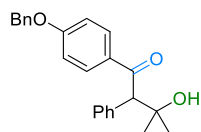

**1-(4-(Benzyloxy)phenyl)-2-phenyl-2-(1-(4,4,5,5-tetramethyl-1,3,2-dioxaborolan-2-yl)cyclopropyl)ethan-1-one (4f)**

The title compound was prepared from (cyclopropylidenemethyl)benzene (27 uL, 0.2 mmol) and 1-(benzyloxy)-4-iodobenzene (34 uL, 0.3 mmol), according to general borocarbonylation III (ring close).

The crude residue was purified by flash chromatography (pentane/EA = 10:1, R<sub>f</sub> = 0.20) to give the product as a colorless oil (58.9 mg, 82%).

**<sup>1</sup>H NMR (300 MHz, CDCl<sub>3</sub>)** δ 7.93 – 7.86 (m, 2H), 7.44 – 7.25 (m, 10H), 6.98 – 6.89 (m, 2H), 5.10 (s, 2H), 4.29 (d, *J* = 1.0 Hz, 1H), 4.20 (s, 1H), 1.01 – 0.92 (m, 1H), 0.89 – 0.79 (m, 1H), 0.72 – 0.62 (m, 1H), 0.54 (ddd, *J* = 10.6, 6.8, 5.2 Hz, 1H).

**<sup>13</sup>C NMR (75 MHz, CDCl<sub>3</sub>)** δ 200.4, 162.8, 136.8, 136.0, 131.3, 129.2, 128.9, 128.8, 128.7, 128.3, 127.4, 127.4, 114.6, 70.1, 59.1, 57.3, 13.3, 11.4.

**HRMS (EI):** calcd for [M] C<sub>24</sub>H<sub>22</sub>O<sub>3</sub> 358.15635, found: 358.15654.

**IR (ATR):** 1657, 1595, 1250, 1217, 1164, 1010, 728, 696, 647, 513 cm<sup>-1</sup>.

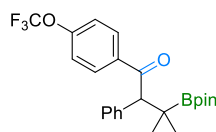

**2-Phenyl-2-(1-(4,4,5,5-tetramethyl-1,3,2-dioxaborolan-2-yl)cyclopropyl)-1-(4-(trifluoromethoxy)phenyl)ethan-1-one (4g)**

The title compound was prepared from (cyclopropylidenemethyl)benzene (27 uL, 0.2 mmol) and 1-iodo-4-(trifluoromethoxy)benzene (45 uL, 0.3 mmol), according to general borocarbonylation II (ring close). The crude residue was purified by flash chromatography (pentane/EA = 20:1, R<sub>f</sub> = 0.41) to give the product as a colorless solid (58.2 mg, 65%).

**<sup>1</sup>H NMR (300 MHz, CDCl<sub>3</sub>)** δ 7.93 – 7.84 (m, 2H), 7.30 – 7.17 (m, 3H), 7.16 – 7.07 (m, 4H), 4.86 (s, 1H), 1.19 (s, 6H), 1.13 (s, 6H), 0.87 (ddd, *J* = 8.9, 5.9, 4.2 Hz, 1H), 0.50 (ddd, *J* = 9.4, 5.7, 3.8 Hz, 1H), 0.41 – 0.28 (m, 1H), 0.15 – 0.03 (m, 1H).

**<sup>13</sup>C NMR (75 MHz, CDCl<sub>3</sub>)** δ 199.2, 151.8, 135.6, 135.5, 130.7, 130.1, 128.4, 127.2, 120.2 (q, *J* = 258.5 Hz), 120.0, 83.3, 56.1, 24.8, 24.1, 6.5, 6.2.

**<sup>11</sup>B NMR (96 MHz, CDCl<sub>3</sub>)** δ 33.8.

**<sup>19</sup>F NMR (282 MHz, CDCl<sub>3</sub>)** δ -57.6.

**HRMS (EI):** calcd for [M] C<sub>24</sub>H<sub>26</sub>BF<sub>3</sub>O<sub>4</sub> 446.18708, found: 446.18792.

**IR (ATR):** 1680, 1410, 1321, 1256, 1210, 1168, 1133, 972, 961, 874, 841, 705, 671 cm<sup>-1</sup>.

Mp: 122-124 °C

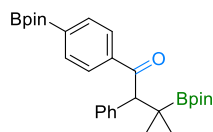

**2-Phenyl-2-(1-(4,4,5,5-tetramethyl-1,3,2-dioxaborolan-2-yl)cyclopropyl)-1-(4-(4,4,5,5-tetramethyl-1,3,2-dioxaborolan-2-yl)phenyl)ethan-1-one (4h)**

The title compound was prepared from (cyclopropylidenemethyl)benzene (27 uL, 0.2 mmol) and 2-(4-iodophenyl)-4,4,5,5-tetramethyl-1,3,2-dioxaborolane (98.1 mg, 0.3 mmol), according to general borocarbonylation II (ring close). The crude residue was purified by flash chromatography (pentane/EA = 20:1, R<sub>f</sub> = 0.20) to give the product as a white solid (45.8 mg, 47%).

**<sup>1</sup>H NMR (300 MHz, CDCl<sub>3</sub>)** δ 7.85 – 7.79 (m, 2H), 7.77 – 7.72 (m, 2H), 7.25 – 7.08 (m, 5H), 4.90 (s, 1H), 1.31 (s, 12H), 1.19 (s, 6H), 1.12 (s, 6H), 0.85 (ddd, *J* = 8.8, 5.9, 4.2 Hz, 1H), 0.50 (ddd, *J* = 8.9, 5.6, 3.7 Hz, 1H), 0.39 – 0.28 (m, 1H), 0.15 – 0.05 (m, 1H).

**<sup>13</sup>C NMR (75 MHz, CDCl<sub>3</sub>)** δ 200.9, 139.3, 135.9, 134.5, 130.2, 128.2, 127.8, 126.9, 84.0, 83.2, 56.1, 24.8, 24.8, 24.8, 24.1, 6.5, 6.3.

**<sup>11</sup>B NMR (96 MHz, CDCl<sub>3</sub>)** δ 30.0.

**HRMS (EI):** calcd for [M] C<sub>29</sub>H<sub>38</sub>B<sub>2</sub>O<sub>5</sub> 487.29362, found: 487.29403.

**IR (ATR):** 2980, 1678, 1398, 1380, 1362, 1315, 1133, 1092, 960, 708, 651 cm<sup>-1</sup>.

Mp: 182-184 °C

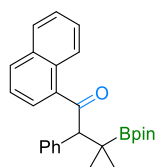

**1-(Naphthalen-1-yl)-2-phenyl-2-(1-(4,4,5,5-tetramethyl-1,3,2-dioxaborolan-2-yl)cyclopropyl)ethan-1-one (4i)**

The title compound was prepared from (cyclopropylidenemethyl)benzene (27 uL, 0.2 mmol) and 1-iodonaphthalene (44 uL, 0.3 mmol), according to general borocarbonylation II (ring close). The crude residue was purified by flash chromatography (pentane/EA = 20:1, R<sub>f</sub> = 0.36) to give the product as a colorless oil (38.8 mg, 47%).

**<sup>1</sup>H NMR (300 MHz, CDCl<sub>3</sub>)** δ 8.63 (ddt, *J* = 8.5, 1.5, 0.8 Hz, 1H), 7.86 – 7.76 (m, 3H), 7.54 (ddd, *J* = 8.5, 6.8, 1.6 Hz, 1H), 7.47 (ddd, *J* = 8.1, 6.8, 1.4 Hz, 1H), 7.38 – 7.31 (m, 1H), 7.23 – 7.08 (m, 5H), 4.95 (s, 1H), 1.23 (s, 6H), 1.15 (s, 6H), 0.98 – 0.90 (m, 1H), 0.62 – 0.46 (m, 2H), 0.18 – 0.07 (m, 1H).

$^{13}\text{C}$  NMR (75 MHz,  $\text{CDCl}_3$ )  $\delta$  204.5, 137.0, 135.8, 133.8, 131.6, 130.6, 130.2, 128.1, 127.4, 127.3, 126.9, 126.1, 126.1, 124.2, 83.3, 59.0, 24.8, 24.3, 7.1, 6.9.

$^{11}\text{B}$  NMR (96 MHz,  $\text{CDCl}_3$ )  $\delta$  33.2.

HRMS (EI): calcd for [M]  $\text{C}_{27}\text{H}_{29}\text{BO}_3$  412.22043, found: 412.22118.

IR (ATR): 2975, 1669, 1449, 1405, 1388, 1371, 1316, 1226, 1132, 848, 777, 704, 671  $\text{cm}^{-1}$ .

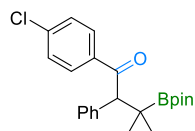

#### 1-(4-Chlorophenyl)-2-phenyl-2-(1-(4,4,5,5-tetramethyl-1,3,2-dioxaborolan-2-yl)cyclopropyl)ethan-1-one (4j)

The title compound was prepared from (cyclopropylidenemethyl)benzene (27  $\mu\text{L}$ , 0.2 mmol) and 1-chloro-4-iodobenzene (71.4 mg, 0.3 mmol), according to general borocarbonylation II (ring close). The crude residue was purified by flash chromatography (pentane/EA = 20:1,  $R_f$  = 0.41) to give the product as a white solid (40.4 mg, 51%).

$^1\text{H}$  NMR (400 MHz,  $\text{CDCl}_3$ )  $\delta$  7.83 – 7.75 (m, 2H), 7.32 – 7.16 (m, 5H), 7.13 – 7.07 (m, 2H), 4.85 (s, 1H), 1.19 (s, 6H), 1.13 (s, 6H), 0.86 (ddd,  $J$  = 8.8, 6.0, 4.3 Hz, 1H), 0.55 – 0.46 (m, 1H), 0.37 – 0.30 (m, 1H), 0.13 – 0.04 (m, 1H).

$^{13}\text{C}$  NMR (101 MHz,  $\text{CDCl}_3$ )  $\delta$  199.4, 138.5, 135.6, 135.6, 130.2, 130.1, 128.5, 128.4, 127.1, 83.2, 56.0, 24.8, 24.1, 6.5, 6.2.

$^{11}\text{B}$  NMR (128 MHz,  $\text{CDCl}_3$ )  $\delta$  33.3.

HRMS (EI): calcd for [M]  $\text{C}_{23}\text{H}_{26}\text{BClO}_3$  396.16580, found: 396.16635.

IR (ATR): 1674, 1408, 1318, 1245, 1135, 1094, 961, 707, 676  $\text{cm}^{-1}$ .

Mp: 132-134  $^\circ\text{C}$

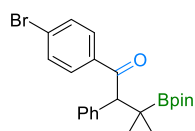

#### 1-(4-Bromophenyl)-2-phenyl-2-(1-(4,4,5,5-tetramethyl-1,3,2-dioxaborolan-2-yl)cyclopropyl)ethan-1-one (4k)

The title compound was prepared from (cyclopropylidenemethyl)benzene (27  $\mu\text{L}$ , 0.2 mmol) and 1-bromo-4-iodobenzene (84.5 mg, 0.3 mmol), according to general borocarbonylation II (ring close). The crude residue was purified by flash chromatography (pentane/EA = 20:1,  $R_f$  = 0.38) to give the product as a white solid (51.9 mg, 59%).

$^1\text{H}$  NMR (300 MHz,  $\text{CDCl}_3$ )  $\delta$  7.73 – 7.67 (m, 2H), 7.49 – 7.39 (m, 2H), 7.29 – 7.15 (m, 3H), 7.13 – 7.06 (m, 2H), 4.84 (s, 1H), 1.19 (s, 6H), 1.12 (s, 6H), 0.86 (ddd,  $J$  = 8.8, 5.9, 4.2 Hz, 1H), 0.59 – 0.41 (m, 1H), 0.38 – 0.28 (m, 1H), 0.13 – 0.03 (m, 1H).

$^{13}\text{C}$  NMR (75 MHz,  $\text{CDCl}_3$ )  $\delta$  199.6, 136.0, 135.6, 131.5, 130.4, 130.1, 128.4, 127.2, 127.1, 83.3, 56.0, 24.8, 24.1, 6.5, 6.2.

$^{11}\text{B}$  NMR (96 MHz,  $\text{CDCl}_3$ )  $\delta$  33.2.

HRMS (EI): calcd for [M]  $\text{C}_{23}\text{H}_{26}\text{BBrO}_3$  441.11687, found: 441.11713.

IR (ATR): 1675, 1407, 1318, 1245, 1135, 962, 751, 708  $\text{cm}^{-1}$ .

Mp: 139-141  $^\circ\text{C}$

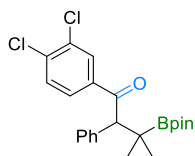

**1-(3,4-Dichlorophenyl)-2-phenyl-2-(1-(4,4,5,5-tetramethyl-1,3,2-dioxaborolan-2-yl)cyclopropyl)ethan-1-one (4l)**

The title compound was prepared from (cyclopropylidene)methylbenzene (27  $\mu\text{L}$ , 0.2 mmol) and 1,2-dichloro-4-iodobenzene (81.9  $\mu\text{L}$ , 0.3 mmol), according to general borocarbonylation II (ring close). The crude residue was purified by flash chromatography (pentane/EA = 20:1,  $R_f$  = 0.41) to give the product as a colorless oil (38.7 mg, 45%).

$^1\text{H}$  NMR (300 MHz,  $\text{CDCl}_3$ )  $\delta$  7.97 (d,  $J$  = 2.0 Hz, 1H), 7.65 (dd,  $J$  = 8.4, 2.1 Hz, 1H), 7.40 (d,  $J$  = 8.3 Hz, 1H), 7.34 – 7.19 (m, 3H), 7.11 (dd,  $J$  = 7.9, 1.7 Hz, 2H), 4.85 (s, 1H), 1.22 (s, 6H), 1.15 (s, 6H), 0.89 (ddd,  $J$  = 8.8, 5.9, 4.2 Hz, 1H), 0.59 – 0.44 (m, 1H), 0.42 – 0.31 (m, 1H), 0.09 (ddd,  $J$  = 8.7, 5.9, 3.8 Hz, 1H).

$^{13}\text{C}$  NMR (75 MHz,  $\text{CDCl}_3$ )  $\delta$  198.5, 136.9, 136.6, 135.1, 132.8, 130.7, 130.3, 130.1, 128.5, 127.8, 127.3, 83.4, 56.0, 24.8, 24.1, 6.5, 6.2.

$^{11}\text{B}$  NMR (96 MHz,  $\text{CDCl}_3$ )  $\delta$  33.6.

HRMS (EI): calcd for [M]  $\text{C}_{23}\text{H}_{25}\text{BCl}_2\text{O}_3$  432.12388, found: 432.12456.

IR (ATR): 1680, 1406, 1318, 1205, 1134, 979, 965, 847, 733, 704, 668  $\text{cm}^{-1}$ .

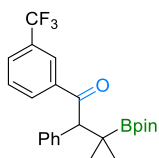

**2-Phenyl-2-(1-(4,4,5,5-tetramethyl-1,3,2-dioxaborolan-2-yl)cyclopropyl)-1-(3-(trifluoromethyl)phenyl)ethan-1-one (4m)**

The title compound was prepared from (cyclopropylidene)methylbenzene (27  $\mu\text{L}$ , 0.2 mmol) and 1-iodo-3-(trifluoromethyl)benzene (43  $\mu\text{L}$ , 0.3 mmol), according to general borocarbonylation II (ring close). The crude residue was purified by flash chromatography (pentane/EA = 20:1,  $R_f$  = 0.37) to give the product as a colorless oil (52.8 mg, 61%).

**<sup>1</sup>H NMR (300 MHz, CDCl<sub>3</sub>)** δ 8.13 (dt, *J* = 1.8, 1.1 Hz, 1H), 7.97 (dddd, *J* = 7.9, 1.7, 1.1, 0.6 Hz, 1H), 7.66 (dddd, *J* = 7.8, 1.9, 1.2, 0.6 Hz, 1H), 7.43 (tt, *J* = 7.9, 0.7 Hz, 1H), 7.30 – 7.16 (m, 3H), 7.15 – 7.09 (m, 2H), 4.89 (s, 1H), 1.19 (s, 6H), 1.13 (s, 6H), 0.88 (ddd, *J* = 8.8, 5.9, 4.2 Hz, 1H), 0.59 – 0.46 (m, 1H), 0.43 – 0.33 (m, 1H), 0.09 (ddd, *J* = 8.7, 5.9, 3.7 Hz, 1H).

**<sup>13</sup>C NMR (75 MHz, CDCl<sub>3</sub>)** δ 199.5, 138.0, 135.2, 131.8, 131.2 (q, *J* = 33.0 Hz), 130.1, 128.8, 128.5 (q, *J* = 3.7 Hz), 128.5, 127.3, 125.6 (q, *J* = 3.7 Hz), 123.7 (q, *J* = 272.8 Hz), 83.4, 56.2, 24.8, 24.1, 6.6, 6.4.

**<sup>11</sup>B NMR (96 MHz, CDCl<sub>3</sub>)** δ 32.9.

**<sup>19</sup>F NMR (282 MHz, CDCl<sub>3</sub>)** δ -62.9.

**HRMS (EI):** calcd for [M] C<sub>24</sub>H<sub>26</sub>BF<sub>3</sub>O<sub>3</sub> 429.19579, found: 429.19489.

**IR (ATR):** 1689, 1406, 1329, 1202, 1166, 1126, 1071, 692, 670 cm<sup>-1</sup>.

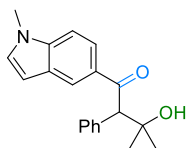

**1-(1-Methyl-1H-indol-5-yl)-2-phenyl-2-(1-(4,4,5,5-tetramethyl-1,3,2-dioxaborolan-2-yl)cyclopropyl)ethan-1-one (4n)**

The title compound was prepared from (cyclopropylidene)methylbenzene (27  $\mu$ L, 0.2 mmol) and 5-iodo-1-methyl-1H-indole (76.8 mg, 0.3 mmol), according to general borocarbonylation III (ring close). The crude residue was purified by flash chromatography (pentane/EA = 10:1, *R<sub>f</sub>* = 0.20) to give the product as a colorless oil (48.3 mg, 79%).

**<sup>1</sup>H NMR (300 MHz, CDCl<sub>3</sub>)** δ 8.22 (d, *J* = 1.1 Hz, 1H), 7.85 (dd, *J* = 8.8, 1.7 Hz, 1H), 7.40 – 7.35 (m, 2H), 7.35 – 7.26 (m, 3H), 7.26 – 7.20 (m, 1H), 7.07 (d, *J* = 3.2 Hz, 1H), 6.53 (dd, *J* = 3.2, 0.9 Hz, 1H), 4.49 (s, 1H), 4.32 (s, 1H), 3.77 (s, 3H), 1.01 – 0.91 (m, 1H), 0.83 (ddd, *J* = 10.3, 6.5, 5.5 Hz, 1H), 0.76 – 0.62 (m, 1H), 0.55 (ddd, *J* = 10.3, 6.5, 4.8 Hz, 1H).

**<sup>13</sup>C NMR (75 MHz, CDCl<sub>3</sub>)** δ 202.1, 139.2, 137.3, 130.5, 129.0, 128.7, 128.2, 127.9, 127.3, 124.0, 122.5, 109.2, 103.2, 59.0, 57.6, 33.0, 13.4, 11.5.

**HRMS (EI):** calcd for [M] C<sub>20</sub>H<sub>19</sub>NO<sub>2</sub> 305.14103, found: 305.14076.

**IR (ATR):** 1648, 1600, 1340, 1249, 1146, 1097, 714, 700, 586, 424 cm<sup>-1</sup>.

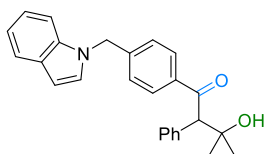

**1-(4-((1H-Indol-1-yl)methyl)phenyl)-2-phenyl-2-(1-(4,4,5,5-tetramethyl-1,3,2-dioxaborolan-2-yl)cyclopropyl)ethan-1-one (4o)**

The title compound was prepared from (cyclopropylidene)methylbenzene (27  $\mu$ L, 0.2 mmol) and 1-(4-iodobenzyl)-1H-indole (100 mg, 0.3 mmol), according to general borocarbonylation III (ring close).

The crude residue was purified by flash chromatography (pentane/EA = 10:1, Rf = 0.25) to give the product as a colorless oil (48.0 mg, 63%).

**<sup>1</sup>H NMR (300 MHz, CDCl<sub>3</sub>)** δ 7.91 – 7.84 (m, 1H), 7.82 – 7.76 (m, 1H), 7.74 – 7.70 (m, 1H), 7.43 – 7.21 (m, 10H), 7.15 (d, *J* = 3.1 Hz, 1H), 6.68 (d, *J* = 3.2 Hz, 1H), 5.39 (s, 2H), 4.19 (s, 1H), 4.11 (d, *J* = 0.9 Hz, 1H), 1.06 – 0.96 (m, 1H), 0.94 – 0.84 (m, 1H), 0.74 – 0.63 (m, 1H), 0.55 (ddd, *J* = 10.5, 6.4, 4.8 Hz, 1H).

**<sup>13</sup>C NMR (75 MHz, CDCl<sub>3</sub>)** δ 201.3, 138.2, 136.4, 136.0, 131.4, 129.1, 129.0, 128.9, 128.1, 128.0, 127.5, 127.1, 121.9, 121.1, 119.7, 109.4, 102.2, 59.7, 57.0, 49.6, 13.1, 11.4.

**HRMS (EI):** calcd for [M] C<sub>26</sub>H<sub>23</sub>NO<sub>2</sub> 381.17233, found: 381.17237.

**IR (ATR):** 1668, 1461, 1254, 1184, 728, 698, 658, 512, 460, 425 cm<sup>-1</sup>.

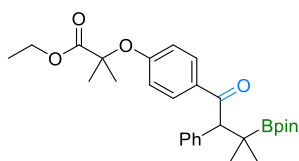

**Ethyl 2-methyl-2-(4-(2-phenyl-2-(1-(4,4,5,5-tetramethyl-1,3,2-dioxaborolan-2-yl)cyclopropyl)acetyl)phenoxy)propanoate (4p)**

The title compound was prepared from (cyclopropylidene)methylbenzene (27 uL, 0.2 mmol) and ethyl 2-(4-iodophenoxy)-2-methylpropanoate (100 mg, 0.3 mmol), according to general borocarbonylation II (ring close). The crude residue was purified by flash chromatography (pentane/EA = 15:1, Rf = 0.26) to give the product as a colorless oil (51.1 mg, 52%).

**<sup>1</sup>H NMR (300 MHz, CDCl<sub>3</sub>)** δ 7.79 – 7.71 (m, 2H), 7.26 – 7.09 (m, 5H), 6.75 – 6.61 (m, 2H), 4.80 (s, 1H), 4.17 (qd, *J* = 7.2, 0.9 Hz, 2H), 1.59 (s, 3H), 1.59 (s, 3H), 1.18 (s, 6H), 1.15 (t, *J* = 7.2 Hz, 3H), 1.12 (s, 6H), 0.84 – 0.76 (m, 1H), 0.50 (ddd, *J* = 9.0, 5.7, 3.8 Hz, 1H), 0.39 – 0.27 (m, 1H), 0.17 – 0.04 (m, 1H).

**<sup>13</sup>C NMR (75 MHz, CDCl<sub>3</sub>)** δ 199.1, 173.8, 158.9, 136.6, 130.8, 130.6, 130.1, 128.2, 126.8, 117.0, 83.1, 79.1, 61.6, 55.9, 25.4, 25.3, 24.7, 24.1, 13.9, 6.5, 6.3.

**<sup>11</sup>B NMR (96 MHz, CDCl<sub>3</sub>)** δ 34.4.

**HRMS (EI):** calcd for [M] C<sub>29</sub>H<sub>37</sub>BO<sub>6</sub> 492.26777, found: 492.26874.

**IR (ATR):** 1731, 1671, 1594, 1413, 1221, 1172, 1136, 1113, 708, 621 cm<sup>-1</sup>.

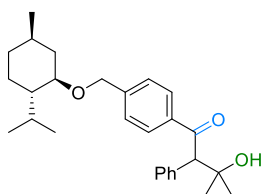

**1-(4-(((1R,2S,5R)-2-Isopropyl-5-methylcyclohexyl)oxy)methyl)phenyl)-2-phenyl-2-(1-(4,4,5,5-tetramethyl-1,3,2-dioxaborolan-2-yl)cyclopropyl)ethan-1-one (4q)**

The title compound was prepared from (cyclopropylidene)methylbenzene (27  $\mu$ L, 0.2 mmol) and 1-iodo-4-(((1R,2S,5R)-2-isopropyl-5-methylcyclohexyl)oxy)methylbenzene (111.0 mg, 0.3 mmol), according to general borocarbonylation III (ring close). The crude residue was purified by flash chromatography (pentane/EA = 10:1,  $R_f$  = 0.20) to give the product as a colorless oil (54.2 mg, 65%).

**$^1\text{H}$  NMR (300 MHz,  $\text{CDCl}_3$ )**  $\delta$  7.90 – 7.80 (m, 2H), 7.38 – 7.27 (m, 6H), 7.26 – 7.21 (m, 1H), 4.64 (dd,  $J$  = 12.4, 2.0 Hz, 1H), 4.37 (dd,  $J$  = 12.4, 2.0 Hz, 1H), 4.24 (s, 1H), 4.12 (d,  $J$  = 1.0 Hz, 1H), 3.14 (tdd,  $J$  = 10.5, 4.3, 1.7 Hz, 1H), 2.24 (dt,  $J$  = 10.5, 6.8, 3.2 Hz, 1H), 2.17 – 2.07 (m, 1H), 1.70 – 1.57 (m, 2H), 1.38 – 1.26 (m, 2H), 0.93 (t,  $J$  = 6.1 Hz, 5H), 0.88 (dd,  $J$  = 7.1, 2.7 Hz, 5H), 0.83 – 0.76 (m, 1H), 0.73 – 0.61 (m, 4H), 0.51 (ddd,  $J$  = 10.3, 6.5, 4.8 Hz, 1H).

**$^{13}\text{C}$  NMR (75 MHz,  $\text{CDCl}_3$ )**  $\delta$  201.5, 145.2, 136.4, 129.1, 129.0, 128.8, 127.5, 127.4, 79.3, 69.6, 59.5, 57.2, 48.2, 40.2, 34.5, 31.5, 25.6, 23.2, 22.3, 21.0, 16.1, 13.2, 11.5.

**HRMS (EI):** calcd for [M]  $\text{C}_{28}\text{H}_{36}\text{O}_3$  420.26590, found: 420.26494.

**IR (ATR):** 2951, 2920, 2866, 1668, 1255, 1215, 1087, 1013, 729, 699, 590, 507  $\text{cm}^{-1}$ .

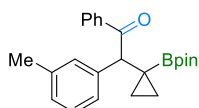

**1-Phenyl-2-(1-(4,4,5,5-tetramethyl-1,3,2-dioxaborolan-2-yl)cyclopropyl)-2-(m-tolyl)ethan-1-one (4r)**

The title compound was prepared from 1-(cyclopropylidene)methyl-3-methylbenzene (32  $\mu$ L, 0.2 mmol) and iodobenzene (34  $\mu$ L, 0.3 mmol), according to general borocarbonylation II (ring close). The crude residue was purified by flash chromatography (pentane/EA = 20:1,  $R_f$  = 0.35) to give the product as a colorless oil (40.0 mg, 53%).

**$^1\text{H}$  NMR (300 MHz,  $\text{CDCl}_3$ )**  $\delta$  7.95 – 7.78 (m, 2H), 7.45 – 7.37 (m, 1H), 7.32 (ddt,  $J$  = 8.3, 6.8, 1.3 Hz, 2H), 7.16 – 7.10 (m, 1H), 7.02 – 6.89 (m, 3H), 4.84 (s, 1H), 2.27 (d,  $J$  = 0.6 Hz, 3H), 0.85 (ddd,  $J$  = 8.8, 5.9, 4.1 Hz, 1H), 0.50 (ddd,  $J$  = 8.8, 5.7, 3.7 Hz, 1H), 0.42 – 0.30 (m, 1H), 0.19 – 0.04 (m, 1H).

**$^{13}\text{C}$  NMR (75 MHz,  $\text{CDCl}_3$ )**  $\delta$  200.7, 137.7, 137.4, 135.9, 132.1, 130.7, 128.8, 128.1, 128.1, 127.7, 127.3, 83.1, 56.1, 24.8, 24.2, 21.4, 6.6, 6.4.

**$^{11}\text{B}$  NMR (96 MHz,  $\text{CDCl}_3$ )**  $\delta$  33.5.

**HRMS (EI):** calcd for [M]  $\text{C}_{24}\text{H}_{29}\text{BO}_3$  376.22043, found: 376.22116.

**IR (ATR):** 1677, 1405, 1306, 1131, 960, 849, 751, 715, 698  $\text{cm}^{-1}$ .



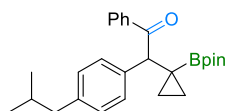

**2-(4-Isobutylphenyl)-1-phenyl-2-(1-(4,4,5,5-tetramethyl-1,3,2-dioxaborolan-2-yl)cyclopropyl)ethan-1-one (4s)**

The title compound was prepared from (cyclopropylidenemethyl)-4-isobutylbenzene (37.2 mg, 0.2 mmol) and iodobenzene (34  $\mu$ L, 0.3 mmol), according to general borocarbonylation II (ring close). The crude residue was purified by flash chromatography (pentane/EA = 20:1,  $R_f$  = 0.36) to give the product as a colorless oil (37.9 mg, 45%).

**$^1\text{H}$  NMR (300 MHz,  $\text{CDCl}_3$ )**  $\delta$  7.89 – 7.80 (m, 2H), 7.45 – 7.36 (m, 1H), 7.34 – 7.27 (m, 2H), 7.06 – 6.97 (m, 4H), 4.88 (s, 1H), 2.38 (d,  $J$  = 7.2 Hz, 2H), 1.79 (hept,  $J$  = 6.6 Hz, 1H), 1.19 (s, 6H), 1.13 (s, 6H), 0.84 (dd,  $J$  = 6.6, 0.6 Hz, 7H), 0.48 (ddd,  $J$  = 8.8, 5.7, 3.6 Hz, 1H), 0.39 – 0.30 (m, 1H), 0.17 – 0.06 (m, 1H).

**$^{13}\text{C}$  NMR (75 MHz,  $\text{CDCl}_3$ )**  $\delta$  200.8, 140.3, 137.4, 133.1, 132.0, 129.9, 129.0, 128.8, 128.1, 83.2, 55.6, 45.0, 30.1, 24.8, 24.1, 22.3, 6.5, 6.1.

**$^{11}\text{B}$  NMR (96 MHz,  $\text{CDCl}_3$ )**  $\delta$  33.6.

**HRMS (EI):** calcd for [M]  $\text{C}_{27}\text{H}_{35}\text{BO}_3$  418.26738, found: 418.26821.

**IR (ATR):** 1681, 1405, 1314, 1213, 1132, 960, 845, 689, 670  $\text{cm}^{-1}$ .

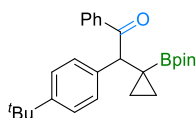

**2-(4-(*tert*-Butyl)phenyl)-1-phenyl-2-(1-(4,4,5,5-tetramethyl-1,3,2-dioxaborolan-2-yl)cyclopropyl)ethan-1-one (4t)**

The title compound was prepared from 1-(*tert*-butyl)-4-(cyclopropylidenemethyl)benzene (40  $\mu$ L, 0.2 mmol) and iodobenzene (34  $\mu$ L, 0.3 mmol), according to general borocarbonylation II (ring close). The crude residue was purified by flash chromatography (pentane/EA = 20:1,  $R_f$  = 0.36) to give the product as a colorless oil (37.0 mg, 44%).

**$^1\text{H}$  NMR (300 MHz,  $\text{CDCl}_3$ )**  $\delta$  7.92 – 7.81 (m, 2H), 7.45 – 7.38 (m, 1H), 7.35 – 7.28 (m, 2H), 7.26 – 7.20 (m, 2H), 7.09 – 7.01 (m, 2H), 4.90 (s, 1H), 1.25 (s, 9H), 1.19 (s, 6H), 1.13 (s, 6H), 0.85 (ddd,  $J$  = 8.7, 6.0, 4.1 Hz, 1H), 0.54 – 0.44 (m, 1H), 0.41 – 0.30 (m, 1H), 0.17 – 0.06 (m, 1H).

**$^{13}\text{C}$  NMR (75 MHz,  $\text{CDCl}_3$ )**  $\delta$  200.9, 149.7, 137.5, 132.6, 132.0, 129.7, 128.8, 128.1, 125.1, 83.2, 55.3, 34.3, 31.3, 24.8, 24.1, 6.6, 6.2.

**$^{11}\text{B}$  NMR (96 MHz,  $\text{CDCl}_3$ )**  $\delta$  32.9.

**HRMS (EI):** calcd for [M]  $\text{C}_{27}\text{H}_{35}\text{BO}_3$  418.26738, found: 418.26794.

**IR (ATR):** 1685, 1405, 1314, 1215, 1133, 1111, 962, 847, 716, 688, 671, 653, 605  $\text{cm}^{-1}$ .

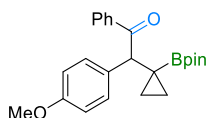

**2-(4-Methoxyphenyl)-1-phenyl-2-(1-(4,4,5,5-tetramethyl-1,3,2-dioxaborolan-2-yl)cyclopropyl)ethan-1-one (4u)**

The title compound was prepared from 1-(cyclopropylidenemethyl)-4-methoxybenzene (32.0 mg, 0.2 mmol) and iodobenzene (34  $\mu$ L, 0.3 mmol), according to general borocarbonylation II (ring close). The crude residue was purified by flash chromatography (pentane/EA = 20:1,  $R_f$  = 0.21) to give the product as a colorless oil (42.4 mg, 54%).

$^1\text{H NMR}$  (300 MHz,  $\text{CDCl}_3$ )  $\delta$  7.88 – 7.80 (m, 2H), 7.45 – 7.37 (m, 1H), 7.34 – 7.27 (m, 2H), 7.08 – 7.02 (m, 2H), 6.80 – 6.74 (m, 2H), 4.84 (s, 1H), 3.74 (s, 3H), 1.19 (s, 6H), 1.13 (s, 6H), 0.84 (ddd,  $J$  = 8.9, 5.9, 4.2 Hz, 1H), 0.59 – 0.42 (m, 1H), 0.38 – 0.28 (m, 1H), 0.16 – 0.05 (m, 1H).

$^{13}\text{C NMR}$  (101 MHz,  $\text{CDCl}_3$ )  $\delta$  200.8, 158.5, 137.4, 132.1, 131.2, 128.8, 128.1, 128.0, 113.7, 83.1, 55.3, 55.1, 24.8, 24.1, 6.4, 6.2.

$^{11}\text{B NMR}$  (128 MHz,  $\text{CDCl}_3$ )  $\delta$  33.1.

**HRMS (EI):** calcd for [M]  $\text{C}_{24}\text{H}_{29}\text{BO}_4$  392.21534, found: 392,21754.

**IR (ATR):** 1679, 1509, 1403, 1302, 1251, 1229, 1130, 1031, 841, 761, 698, 680, 669  $\text{cm}^{-1}$ .

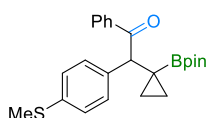

**2-(4-(Methylthio)phenyl)-1-phenyl-2-(1-(4,4,5,5-tetramethyl-1,3,2-dioxaborolan-2-yl)cyclopropyl)ethan-1-one (4v)**

The title compound was prepared from (4-(cyclopropylidenemethyl)phenyl)(methyl)sulfane (35.2 mg, 0.2 mmol) and iodobenzene (34  $\mu$ L, 0.3 mmol), according to general borocarbonylation II (ring close). The crude residue was purified by flash chromatography (pentane/EA = 20:1,  $R_f$  = 0.21) to give the product as a colorless oil (47.8 mg, 59%).

$^1\text{H NMR}$  (300 MHz,  $\text{CDCl}_3$ )  $\delta$  7.88 – 7.80 (m, 2H), 7.45 – 7.38 (m, 1H), 7.32 (ddt,  $J$  = 8.3, 6.8, 1.2 Hz, 2H), 7.15 – 7.03 (m, 4H), 4.82 (s, 1H), 2.42 (s, 3H), 1.19 (s, 6H), 1.13 (s, 6H), 0.84 (ddd,  $J$  = 8.8, 5.9, 4.2 Hz, 1H), 0.58 – 0.47 (m, 1H), 0.41 – 0.29 (m, 1H), 0.17 – 0.05 (m, 1H).

$^{13}\text{C NMR}$  (75 MHz,  $\text{CDCl}_3$ )  $\delta$  200.5, 137.2, 137.0, 132.9, 132.2, 130.5, 128.8, 128.2, 126.2, 83.2, 55.6, 24.7, 24.2, 15.5, 6.6, 6.4.

$^{11}\text{B NMR}$  (96 MHz,  $\text{CDCl}_3$ )  $\delta$  33.1.

**HRMS (EI):** calcd for [M]  $\text{C}_{24}\text{H}_{29}\text{BO}_3\text{S}$  408.19250, found: 408.19333.

**IR (ATR):** 2974, 1678, 1398, 1308, 1216, 1130, 960, 841, 713, 678  $\text{cm}^{-1}$ .

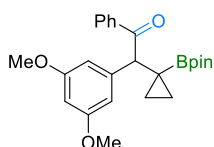

**2-(3,5-Dimethoxyphenyl)-1-phenyl-2-(1-(4,4,5,5-tetramethyl-1,3,2-dioxaborolan-2-yl)cyclopropyl)ethan-1-one (4w)**

The title compound was prepared from 1-(cyclopropylidenemethyl)-3,5-dimethoxybenzene (38  $\mu$ L, 0.2 mmol) and iodobenzene (34  $\mu$ L, 0.3 mmol), according to general borocarbonylation II (ring close). The crude residue was purified by flash chromatography (pentane/EA = 20:1,  $R_f$  = 0.16) to give the product as a colorless oil (58.5 mg, 70%).

**$^1\text{H}$  NMR (300 MHz,  $\text{CDCl}_3$ )**  $\delta$  7.92 – 7.80 (m, 2H), 7.46 – 7.39 (m, 1H), 7.36 – 7.28 (m, 2H), 6.32 (d,  $J$  = 2.2 Hz, 2H), 6.31 – 6.26 (m, 1H), 4.71 (s, 1H), 3.71 (s, 6H), 1.20 (s, 6H), 1.14 (s, 6H), 0.84 (ddd,  $J$  = 8.8, 6.0, 4.0 Hz, 1H), 0.59 – 0.51 (m, 1H), 0.50 – 0.41 (m, 1H), 0.25 – 0.15 (m, 1H).

**$^{13}\text{C}$  NMR (75 MHz,  $\text{CDCl}_3$ )**  $\delta$  200.4, 160.4, 138.5, 137.3, 132.2, 128.7, 128.2, 108.3, 99.0, 83.1, 56.9, 55.2, 25.0, 24.7, 24.2, 7.1, 7.1.

**$^{11}\text{B}$  NMR (96 MHz,  $\text{CDCl}_3$ )**  $\delta$  32.2.

**HRMS (EI):** calcd for [M]  $\text{C}_{25}\text{H}_{31}\text{BO}_5$  422.22591, found: 422.22701.

**IR (ATR):** 1681, 1593, 1404, 1314, 1203, 1131, 1060, 848, 688  $\text{cm}^{-1}$ .

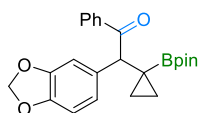

**2-(Benzo[d][1,3]dioxol-5-yl)-1-phenyl-2-(1-(4,4,5,5-tetramethyl-1,3,2-dioxaborolan-2-yl)cyclopropyl)ethan-1-one (4x)**

The title compound was prepared from 5-(cyclopropylidenemethyl)benzo[d][1,3]dioxole (31  $\mu$ L, 0.2 mmol) and iodobenzene (34  $\mu$ L, 0.3 mmol), according to general borocarbonylation II (ring close). The crude residue was purified by flash chromatography (pentane/EA = 20:1,  $R_f$  = 0.21) to give the product as a colorless oil (49.6 mg, 61%).

**$^1\text{H}$  NMR (300 MHz,  $\text{CDCl}_3$ )**  $\delta$  7.89 – 7.83 (m, 2H), 7.47 – 7.39 (m, 1H), 7.33 (ddt,  $J$  = 8.3, 6.8, 1.2 Hz, 2H), 6.71 – 6.65 (m, 2H), 6.59 (dd,  $J$  = 8.0, 1.8 Hz, 1H), 5.91 – 5.86 (m, 2H), 4.77 (s, 1H), 1.19 (s, 6H), 1.13 (s, 6H), 0.85 (ddd,  $J$  = 8.8, 5.9, 4.1 Hz, 1H), 0.53 (ddd,  $J$  = 8.8, 5.6, 3.6 Hz, 1H), 0.46 – 0.30 (m, 1H), 0.21 – 0.12 (m, 1H).

**$^{13}\text{C}$  NMR (101 MHz,  $\text{CDCl}_3$ )**  $\delta$  200.5, 147.5, 146.5, 137.3, 132.2, 129.8, 128.8, 128.2, 123.5, 110.4, 108.1, 100.9, 83.2, 55.8, 24.7, 24.2, 6.7, 6.6.

**$^{11}\text{B}$  NMR (128 MHz,  $\text{CDCl}_3$ )**  $\delta$  32.9.

**HRMS (EI):** calcd for [M]  $\text{C}_{24}\text{H}_{27}\text{BO}_5$  406.19461, found: 406.19576.

**IR (ATR):** 1676, 1486, 1401, 1306, 1242, 1230, 1131, 1038, 931, 850, 699, 659  $\text{cm}^{-1}$ .

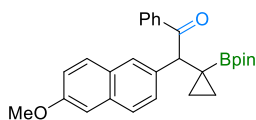

**2-(6-Methoxynaphthalen-2-yl)-1-phenyl-2-(1-(4,4,5,5-tetramethyl-1,3,2-dioxaborolan-2-yl)cyclopropyl)ethan-1-one (4y)**

The title compound was prepared from 2-(cyclopropylidenemethyl)-6-methoxynaphthalene (42.0 mg, 0.2 mmol) and iodobenzene (34  $\mu$ L, 0.3 mmol), according to general borocarbonylation II (ring close). The crude residue was purified by flash chromatography (pentane/EA = 20:1,  $R_f$  = 0.16) to give the product as a colorless oil (61.7 mg, 70%).

**$^1\text{H}$  NMR (300 MHz,  $\text{CDCl}_3$ )**  $\delta$  7.91 – 7.85 (m, 2H), 7.63 (dd,  $J$  = 8.9, 4.3 Hz, 2H), 7.51 (d,  $J$  = 2.0 Hz, 1H), 7.42 – 7.34 (m, 1H), 7.32 – 7.27 (m, 2H), 7.26 – 7.24 (m, 1H), 7.13 – 7.04 (m, 2H), 5.00 (s, 1H), 3.88 (s, 3H), 1.20 (s, 6H), 1.14 (s, 6H), 0.87 (ddd,  $J$  = 8.7, 5.9, 4.1 Hz, 1H), 0.57 – 0.46 (m, 1H), 0.45 – 0.35 (m, 1H), 0.19 – 0.08 (m, 1H).

**$^{13}\text{C}$  NMR (101 MHz,  $\text{CDCl}_3$ )**  $\delta$  200.7, 157.6, 137.4, 133.5, 132.1, 131.3, 129.3, 128.8, 128.8, 128.7, 128.2, 126.8, 118.8, 105.4, 83.2, 56.1, 55.3, 24.8, 24.2, 6.7, 6.4.

**$^{11}\text{B}$  NMR (128 MHz,  $\text{CDCl}_3$ )**  $\delta$  33.9.

**HRMS (EI):** calcd for [M]  $\text{C}_{28}\text{H}_{31}\text{BO}_4$  442.23099, found: 442.23141.

**IR (ATR):** 1680, 1604, 1405, 1390, 1314, 1258, 1222, 1204, 1163, 1133, 1028, 847, 679  $\text{cm}^{-1}$ .

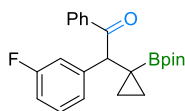

**2-(4-Fluorophenyl)-1-phenyl-2-(1-(4,4,5,5-tetramethyl-1,3,2-dioxaborolan-2-yl)cyclopropyl)ethan-1-one (4z)**

The title compound was prepared from 1-(cyclopropylidenemethyl)-3-fluorobenzene (28  $\mu$ L, 0.2 mmol) and iodobenzene (34  $\mu$ L, 0.3 mmol), according to general borocarbonylation II (ring close). The crude residue was purified by flash chromatography (pentane/EA = 20:1,  $R_f$  = 0.36) to give the product as a colorless oil (68.0 mg, 89%).

**$^1\text{H}$  NMR (300 MHz,  $\text{CDCl}_3$ )**  $\delta$  7.92 – 7.74 (m, 2H), 7.48 – 7.41 (m, 1H), 7.38 – 7.30 (m, 2H), 7.21 (td,  $J$  = 7.9, 6.1 Hz, 1H), 7.02 – 6.82 (m, 3H), 4.80 (s, 1H), 1.18 (s, 6H), 1.13 (s, 6H), 0.85 (ddd,  $J$  = 8.9, 5.9, 4.2 Hz, 1H), 0.66 – 0.55 (m, 1H), 0.44 – 0.32 (m, 1H), 0.25 – 0.15 (m, 1H).

**$^{13}\text{C}$  NMR (75 MHz,  $\text{CDCl}_3$ )**  $\delta$  200.0, 162.6 (d,  $J$  = 245.7 Hz), 139.2 (d,  $J$  = 7.1 Hz), 137.1, 132.4, 129.6 (d,  $J$  = 8.4 Hz), 128.7, 128.3, 125.7 (d,  $J$  = 3.0 Hz), 116.9 (d,  $J$  = 21.9 Hz), 113.9 (d,  $J$  = 21.2 Hz), 83.3, 56.0, 56.0, 24.7, 24.2, 7.1.

**$^{11}\text{B}$  NMR (96 MHz,  $\text{CDCl}_3$ )**  $\delta$  32.7.

**$^{19}\text{F}$  NMR (282 MHz,  $\text{CDCl}_3$ )**  $\delta$  -112.98 (td,  $J$  = 9.2, 5.3 Hz).

**HRMS (EI):** calcd for [M]  $\text{C}_{23}\text{H}_{26}\text{BFO}_3$  380.19536, found: 380.19634.

**IR (ATR):** 1682, 1445, 1404, 1390, 1317, 1206, 1138, 1129, 961, 851, 737, 690  $\text{cm}^{-1}$ .

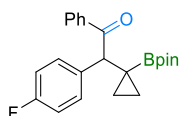

**2-(4-Fluorophenyl)-1-phenyl-2-(1-(4,4,5,5-tetramethyl-1,3,2-dioxaborolan-2-yl)cyclopropyl)ethan-1-one (4aa)**

The title compound was prepared from 1-(cyclopropylidenemethyl)-4-fluorobenzene (28  $\mu$ L, 0.2 mmol) and iodobenzene (34  $\mu$ L, 0.3 mmol), according to general borocarbonylation II (ring close). The crude residue was purified by flash chromatography (pentane/EA = 20:1,  $R_f$  = 0.36) to give the product as a colorless oil (43.0 mg, 57%).

$^1\text{H NMR}$  (300 MHz,  $\text{CDCl}_3$ )  $\delta$  7.92 – 7.76 (m, 2H), 7.47 – 7.40 (m, 1H), 7.33 (ddt,  $J$  = 8.3, 6.8, 1.2 Hz, 2H), 7.18 – 7.09 (m, 2H), 6.99 – 6.87 (m, 2H), 4.82 (s, 1H), 1.18 (s, 6H), 1.13 (s, 6H), 0.84 (ddd,  $J$  = 8.8, 5.8, 4.2 Hz, 1H), 0.57 (ddd,  $J$  = 8.9, 5.6, 3.8 Hz, 1H), 0.38 – 0.28 (m, 1H), 0.20 – 0.09 (m, 1H).

$^{13}\text{C NMR}$  (75 MHz,  $\text{CDCl}_3$ )  $\delta$  200.4, 161.9 (d,  $J$  = 245.7 Hz), 137.2, 132.3, 132.3 (d,  $J$  = 3.4 Hz), 131.5 (d,  $J$  = 7.7 Hz), 128.8, 128.2, 115.2 (d,  $J$  = 21.2 Hz), 83.2, 55.4, 24.7, 24.2, 6.8, 6.7.

$^{11}\text{B NMR}$  (96 MHz,  $\text{CDCl}_3$ )  $\delta$  33.4.

$^{19}\text{F NMR}$  (282 MHz,  $\text{CDCl}_3$ )  $\delta$  -115.68 (ddd,  $J$  = 13.7, 8.4, 5.0 Hz).

**HRMS (EI):** calcd for [M]  $\text{C}_{23}\text{H}_{26}\text{BFO}_3$  380.19536, found: 380.19647.

**IR (ATR):** 1674, 1504, 1406, 1311, 1218, 1131, 844, 763, 696, 680, 609  $\text{cm}^{-1}$ .

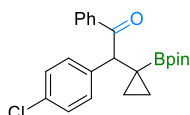

**2-(4-Chlorophenyl)-1-phenyl-2-(1-(4,4,5,5-tetramethyl-1,3,2-dioxaborolan-2-yl)cyclopropyl)ethan-1-one (4bb)**

The title compound was prepared from 1-chloro-4-(cyclopropylidenemethyl)benzene (32.8 mg, 0.2 mmol) and iodobenzene (34  $\mu$ L, 0.3 mmol), according to general borocarbonylation II (ring close). The crude residue was purified by flash chromatography (pentane/EA = 20:1,  $R_f$  = 0.36) to give the product as a colorless oil (34.5 mg, 44%).

$^1\text{H NMR}$  (300 MHz,  $\text{CDCl}_3$ )  $\delta$  7.90 – 7.75 (m, 2H), 7.49 – 7.40 (m, 1H), 7.37 – 7.30 (m, 2H), 7.25 – 7.18 (m, 2H), 7.15 – 7.08 (m, 2H), 4.78 (s, 1H), 1.18 (s, 6H), 1.13 (s, 6H), 0.84 (ddd,  $J$  = 8.8, 5.9, 4.3 Hz, 1H), 0.64 – 0.53 (m, 1H), 0.39 – 0.28 (m, 1H), 0.20 – 0.09 (m, 1H).

$^{13}\text{C NMR}$  (75 MHz,  $\text{CDCl}_3$ )  $\delta$  200.2, 137.1, 135.2, 132.9, 132.4, 131.3, 128.8, 128.5, 128.3, 83.2, 55.6, 24.7, 24.2, 6.9, 6.9.

$^{11}\text{B NMR}$  (96 MHz,  $\text{CDCl}_3$ )  $\delta$  32.5.

**HRMS (EI):** calcd for [M]  $\text{C}_{23}\text{H}_{26}\text{BClO}_3$  395.16944, found: 395.16836.

**IR (ATR):** 1685, 1401, 1314, 1232, 1216, 1132, 961, 816, 715, 690, 680, 670, 644  $\text{cm}^{-1}$ .

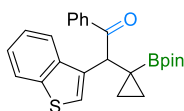

**2-(Benzo[b]thiophen-3-yl)-1-phenyl-2-(1-(4,4,5,5-tetramethyl-1,3,2-dioxaborolan-2-yl)cyclopropyl)ethan-1-one (4cc)**

The title compound was prepared from 3-(cyclopropylidenemethyl)benzo[b]thiophene (37.2 mg, 0.2 mmol) and iodobenzene (34  $\mu$ L, 0.3 mmol), according to general borocarbonylation II (ring close). The crude residue was purified by flash chromatography (pentane/EA = 20:1,  $R_f$  = 0.21) to give the product as a colorless oil (49.7 mg, 60%).

**$^1\text{H NMR}$  (300 MHz,  $\text{CDCl}_3$ )**  $\delta$  7.93 (d,  $J$  = 7.9 Hz, 1H), 7.88 – 7.79 (m, 3H), 7.48 – 7.36 (m, 3H), 7.35 – 7.26 (m, 2H), 7.11 (s, 1H), 5.42 (s, 1H), 1.20 (s, 6H), 1.16 (s, 6H), 0.93 – 0.85 (m, 1H), 0.58 – 0.46 (m, 2H), 0.08 – -0.03 (m, 1H).

**$^{13}\text{C NMR}$  (75 MHz,  $\text{CDCl}_3$ )**  $\delta$  199.9, 140.2, 138.9, 137.1, 132.3, 130.6, 128.4, 128.3, 125.8, 124.4, 124.3, 123.0, 121.5, 83.3, 48.3, 24.8, 24.2, 7.8, 7.1.

**$^{11}\text{B NMR}$  (96 MHz,  $\text{CDCl}_3$ )**  $\delta$  33.1.

**HRMS (EI):** calcd for [M]  $\text{C}_{25}\text{H}_{27}\text{BO}_3\text{S}$  418.17685, found: 418.17801.

**IR (ATR):** 1677, 1405, 1312, 1216, 1133, 959, 847, 755, 732, 721, 694, 672, 659  $\text{cm}^{-1}$ .

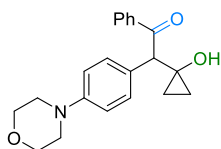

**2-(4-Morpholinophenyl)-1-phenyl-2-(1-(4,4,5,5-tetramethyl-1,3,2-dioxaborolan-2-yl)cyclopropyl)ethan-1-one (4dd)**

The title compound was prepared from 4-(4-(cyclopropylidenemethyl)phenyl)morpholine (43.0 mg, 0.2 mmol) and iodobenzene (34  $\mu$ L, 0.3 mmol), according to general borocarbonylation III (ring close). The crude residue was purified by flash chromatography (pentane/EA = 3:1,  $R_f$  = 0.20) to give the product as a red oil (47.7 mg, 70%).

**$^1\text{H NMR}$  (300 MHz,  $\text{CDCl}_3$ )**  $\delta$  7.91 – 7.85 (m, 2H), 7.51 – 7.44 (m, 1H), 7.40 – 7.32 (m, 2H), 7.22 – 7.15 (m, 2H), 6.88 – 6.82 (m, 2H), 4.22 (s, 1H), 4.06 (s, 1H), 3.84 – 3.79 (m, 4H), 3.14 – 3.10 (m, 4H), 0.96 – 0.87 (m, 1H), 0.85 – 0.75 (m, 1H), 0.67 – 0.58 (m, 1H), 0.48 (ddd,  $J$  = 10.2, 6.4, 4.7 Hz, 1H).

**$^{13}\text{C NMR}$  (75 MHz,  $\text{CDCl}_3$ )**  $\delta$  201.9, 150.4, 136.2, 133.2, 129.8, 128.9, 128.5, 127.3, 115.8, 66.8, 58.7, 57.2, 48.9, 12.9, 11.4.

**HRMS (EI):** calcd for [M]  $\text{C}_{21}\text{H}_{23}\text{NO}_3$  337.16725, found: 337.16803.

**IR (ATR):** 1667, 1514, 1447, 1236, 1214, 1175, 1116, 924, 785, 733, 689, 658, 551  $\text{cm}^{-1}$ .

## 6. Derivatization of $\gamma$ -vinylboryl ketone **3a** and $\beta$ -cyclopropylboryl ketone **4a**

### 6.1 Procedure of oxidation<sup>2</sup>

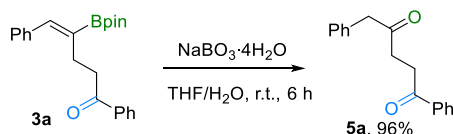

### 1,5-Diphenylpentane-1,4-dione (**5a**)

The title compound was synthesized according to the following procedure: To the boration product **3a** (36.2 mg, 0.1 mmol) in THF (2.0 mL) and water (2.0 mL) was added  $\text{NaBO}_3 \cdot 4\text{H}_2\text{O}$  (76.5 mg, 5 equiv). The reaction mixture was stirred vigorously for 6 h at room temperature. The reaction mixture was quenched with water and then extracted with ethyl acetate (5 mL). The combined organic layers were washed with brine (15 mL), dried over  $\text{Na}_2\text{SO}_4$  and concentrated. The crude product was purified by column chromatography on silica gel to afford the corresponding product **5a** as a colorless oil (24.2 mg, 96%).

$^1\text{H NMR}$  (300 MHz,  $\text{CDCl}_3$ )  $\delta$  8.03 – 7.92 (m, 2H), 7.62 – 7.54 (m, 1H), 7.51 – 7.43 (m, 2H), 7.41 – 7.34 (m, 2H), 7.33 – 7.25 (m, 3H), 3.85 (s, 2H), 3.33 – 3.23 (m, 2H), 2.92 (dd,  $J = 6.9, 5.7$  Hz, 2H).

$^{13}\text{C NMR}$  (75 MHz,  $\text{CDCl}_3$ )  $\delta$  207.0, 198.5, 136.6, 134.2, 133.1, 129.5, 128.7, 128.5, 128.0, 127.0, 50.2, 35.6, 32.5.

IR (ATR): 1712, 1681, 1448, 1351, 1212, 761, 734, 689  $\text{cm}^{-1}$ .

### 6.2 Procedure of iodination<sup>3</sup>

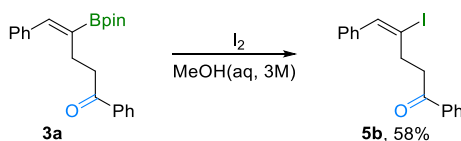

### (*E*)-4-Iodo-1,5-diphenylpent-4-en-1-one (**5b**)

The title compound was synthesized according to the following procedure: To a solution of **3a** (36.2 mg, 0.1 mmol) in THF (1.0 mL) was added 0.1 mL of  $\text{NaOH}$  (aq. 3M, 0.3 mmol). After stirring for 10 minutes at room temperature, 0.1 mL of solution of  $\text{I}_2$  (2M, 0.2 mmol) in THF was added into the reaction mixture, and the resulting mixture was stirred for another 1 h. The mixture was then quenched with saturated aqueous  $\text{Na}_2\text{S}_2\text{O}_4$  (5.0 mL) and extracted with diethyl ether for three times. The combined organic layers were washed with saturated aqueous  $\text{NHCO}_3$  solution and brine, then dried over  $\text{Na}_2\text{SO}_4$ . The volatiles were removed under reduced pressure and the residue was purified by column chromatography on silica gel to afford the corresponding product **5b** as a colorless oil (21.0 mg, 58%).

**<sup>1</sup>H NMR (300 MHz, CDCl<sub>3</sub>)** δ 8.03 – 7.94 (m, 2H), 7.62 – 7.54 (m, 1H), 7.51 – 7.43 (m, 2H), 7.39 – 7.26 (m, 4H), 7.21 (ddd, *J* = 7.2, 1.9, 1.1 Hz, 2H), 3.36 – 3.25 (m, 2H), 3.10 – 2.96 (m, 2H).

**<sup>13</sup>C NMR (75 MHz, CDCl<sub>3</sub>)** δ 198.0, 141.9, 137.3, 136.5, 133.3, 128.7, 128.6, 128.1, 128.0, 127.5, 106.5, 39.2, 34.1.

**IR (ATR):** 2953, 2921, 1683, 1447, 1272, 1202, 1182, 1079, 1030, 968, 741, 688, 650 cm<sup>-1</sup>.

### 6.3 Procedure of Suzuki-Miyaura coupling<sup>4</sup>

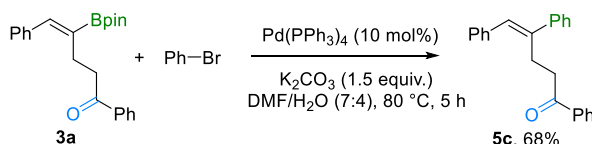

#### (*E*)-1,4,5-Triphenylpent-4-en-1-one (**5c**)

The title compound was synthesized according to the following procedure: To a 5 mL Schlenk flask charged with a magnetic stirring bar, were added the **3a** (72.4 mg, 0.2 mmol), PhBr (37.2 mg, 0.24 mmol), Pd(PPh<sub>3</sub>)<sub>4</sub> (23.1 mg, 10 mol%), K<sub>2</sub>CO<sub>3</sub> (41.7 mg, 0.3 mmol), DMF (0.7 mL) and H<sub>2</sub>O (0.4 mL). The flask was sealed with a PTFE septum and allowed to react at 80 °C for 5 h. The reaction mixture was quenched with water and then extracted with ethyl acetate (5 mL) and concentrated. The crude product was purified by column chromatography on silica gel to afford the corresponding product **5c** as a colorless oil (42.2 mg, 68%).

**<sup>1</sup>H NMR (300 MHz, CDCl<sub>3</sub>)** δ 7.91 – 7.85 (m, 2H), 7.59 – 7.52 (m, 3H), 7.47 – 7.26 (m, 10H), 6.86 (s, 1H), 3.28 – 3.18 (m, 2H), 3.15 – 3.06 (m, 2H).

**<sup>13</sup>C NMR (75 MHz, CDCl<sub>3</sub>)** δ 199.3, 142.1, 141.4, 137.8, 136.6, 133.0, 129.2, 128.6, 128.6, 128.5, 128.4, 128.0, 127.5, 126.8, 126.6, 37.6, 24.7.

**IR (ATR):** 1681, 1595, 1447, 1267, 1201, 968, 757, 741, 733, 696, 689, 655, 643, 506 cm<sup>-1</sup>.

### 6.4 Procedure of protodeboronation<sup>5</sup>

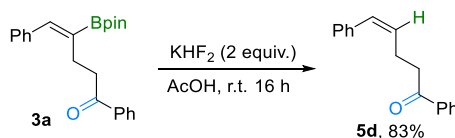

#### (*Z*)-1,5-Diphenylpent-4-en-1-one (**5d**)

The title compound was synthesized according to the following procedure: To a 5 mL Schlenk flask charged with a magnetic stirring bar, were added the **3a** (36.2 mg, 0.1 mmol), KHF<sub>2</sub> (23.4 mg, 0.3 mmol) and HOAc (2 mL) under air. Then the reaction was allowed to stir at room temperature for 6 h. The reaction mixture was quenched with saturated NaHCO<sub>3</sub> solution slowly and resulting mixture was extracted with ethyl acetate (5 mL). The combined organic layers were washed with brine and dried over anhydrous Na<sub>2</sub>SO<sub>4</sub>. The volatiles were removed under reduced pressure and the residue was



purified by column chromatography on silica gel to afford the corresponding product **5d** as a colorless oil (19.6 mg, 83%).

**<sup>1</sup>H NMR (300 MHz, CDCl<sub>3</sub>)** δ 8.00 – 7.93 (m, 2H), 7.59 – 7.53 (m, 1H), 7.49 – 7.42 (m, 2H), 7.38 – 7.29 (m, 4H), 7.26 – 7.19 (m, 1H), 6.49 (dt, *J* = 11.6, 1.9 Hz, 1H), 5.72 (dt, *J* = 11.6, 7.3 Hz, 1H), 3.12 (t, *J* = 7.5 Hz, 2H), 2.79 (qd, *J* = 7.6, 2.1 Hz, 2H).

**<sup>13</sup>C NMR (75 MHz, CDCl<sub>3</sub>)** δ 199.3, 137.3, 136.8, 133.0, 130.9, 130.0, 128.7, 128.6, 128.2, 128.0, 126.7, 38.6, 23.2.

**IR (ATR):** 1682, 1447, 1202, 1179, 967, 767, 745, 688, 655 cm<sup>-1</sup>.

## 6.5 Procedure of oxidation<sup>2</sup>

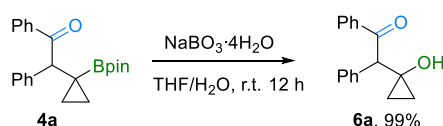

### 2-(1-Hydroxycyclopropyl)-1,2-diphenylethan-1-one (**6a**)

The title compound was synthesized according to the following procedure: To the boration product **4a** (72.4 mg, 0.2 mmol) in THF (3.0 mL) and water (3.0 mL) was added NaBO<sub>3</sub>·4H<sub>2</sub>O (153.0 mg, 5 equiv). The reaction mixture was stirred vigorously for 6 h at room temperature. The reaction mixture was quenched with water and then extracted with ethyl acetate (5 mL). The combined organic layers were washed with brine (15 mL), dried over Na<sub>2</sub>SO<sub>4</sub> and concentrated. The crude product was purified by column chromatography on silica gel to afford the corresponding product **6a** as a colorless oil (50.3 mg, 99%).

**<sup>1</sup>H NMR (300 MHz, CDCl<sub>3</sub>)** δ 8.01 – 7.85 (m, 2H), 7.56 – 7.48 (m, 1H), 7.43 – 7.25 (m, 7H), 4.29 (s, 1H), 4.15 (d, *J* = 1.0 Hz, 1H), 0.98 (ddd, *J* = 10.6, 6.4, 4.9 Hz, 1H), 0.90 – 0.80 (m, 1H), 0.69 (dddd, *J* = 10.3, 6.3, 5.5, 1.0 Hz, 1H), 0.55 (ddd, *J* = 10.3, 6.5, 4.8 Hz, 1H).

**<sup>13</sup>C NMR (75 MHz, CDCl<sub>3</sub>)** δ 201.8, 136.3, 136.1, 133.4, 129.0, 128.9, 128.9, 128.6, 127.5, 59.5, 57.2, 13.2, 11.5.

**IR (ATR):** 1682, 1655, 1449, 1249, 1212, 1198, 1013, 759, 736, 700, 692, 681, 658, 545 cm<sup>-1</sup>.

## 6.6 Procedure of reduction

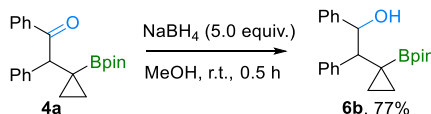

### 1,2-Diphenyl-2-(1-(4,4,5,5-tetramethyl-1,3,2-dioxaborolan-2-yl)cyclopropyl)ethan-1-ol (**6b**)

The title compound was synthesized according to the following procedure: To the boration product **4a** (36.2 mg, 0.2 mmol) in MeOH (3.0 mL) was added NaBH<sub>4</sub> (38.0 mg, 5 equiv). The reaction mixture was stirred vigorously for 0.5 h at room temperature. The reaction mixture was quenched with water

and then extracted with ethyl acetate (5 mL). The combined organic layers were washed with brine (15 mL), dried over  $\text{Na}_2\text{SO}_4$  and concentrated. The crude product was purified by column chromatography on silica gel to afford the corresponding product **6b** as a colorless oil (27.9 mg, 77%).

$^1\text{H NMR}$  (300 MHz,  $\text{CDCl}_3$ )  $\delta$  7.42 (dt,  $J = 8.1, 1.5$  Hz, 4H), 7.36 – 7.21 (m, 6H), 5.57 (dd,  $J = 7.7, 1.8$  Hz, 1H), 2.81 (d,  $J = 1.8$  Hz, 1H), 1.85 (d,  $J = 7.7$  Hz, 1H), 1.31 (s, 6H), 1.28 (s, 6H), 0.74 – 0.65 (m, 1H), 0.51 – 0.41 (m, 1H), 0.28 (ddd,  $J = 9.6, 5.9, 3.8$  Hz, 1H), 0.00 (ddd,  $J = 8.4, 5.8, 3.8$  Hz, 1H).

$^{13}\text{C NMR}$  (75 MHz,  $\text{CDCl}_3$ )  $\delta$  143.8, 142.5, 129.2, 128.1, 127.8, 127.1, 126.9, 126.5, 83.5, 76.0, 64.1, 25.0, 24.2, 16.2, 11.6.

$^{11}\text{B NMR}$  (96 MHz,  $\text{CDCl}_3$ )  $\delta$  33.0.

### 6.7 Procedure of condensation

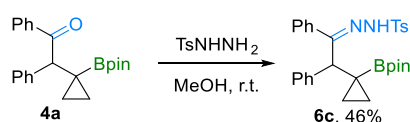

#### (Z)-N'-(1,2-Diphenyl-2-(1-(4,4,5,5-tetramethyl-1,3,2-dioxaborolan-2-yl)cyclopropyl)ethylidene)-4-methylbenzenesulfonohydrazide (**6c**)

The title compound was synthesized according to the following procedure: To the boration product **4a** (72.4 mg, 0.2 mmol) in MeOH (2.0 mL) was added  $\text{Na}_2\text{SO}_4$  (56.8 mg, 2.0 equiv.) and  $\text{TsNHNH}_2$  (56.0 mg, 1.5 equiv.). The reaction mixture was stirred vigorously for 12 h at room temperature. After the **4a** was consumed completely, the crude product was purified by column chromatography on silica gel to afford the corresponding product **6c** as a white solid (48.9 mg, 77%).

$^1\text{H NMR}$  (300 MHz,  $\text{CDCl}_3$ )  $\delta$  7.99 – 7.86 (m, 2H), 7.38 (dt,  $J = 8.0, 0.6$  Hz, 2H), 7.33 – 7.26 (m, 4H), 7.13 – 7.04 (m, 2H), 6.93 – 6.84 (m, 2H), 6.75 (dd,  $J = 8.3, 1.5$  Hz, 2H), 4.05 (s, 1H), 2.50 (s, 3H), 1.22 (s, 6H), 1.14 (s, 6H), 0.92 – 0.85 (m, 1H), 0.43 – 0.26 (m, 2H), -0.13 – -0.25 (m, 1H).

$^{13}\text{C NMR}$  (75 MHz,  $\text{CDCl}_3$ )  $\delta$  159.9, 143.8, 135.9, 135.6, 134.2, 130.4, 129.4, 129.2, 129.1, 128.6, 128.0, 127.6, 126.8, 83.2, 55.0, 25.2, 24.1, 21.6, 7.1, 6.7.

$^{11}\text{B NMR}$  (96 MHz,  $\text{CDCl}_3$ )  $\delta$  33.5.

### 6.8 Procedure for trifluoroborate preparation

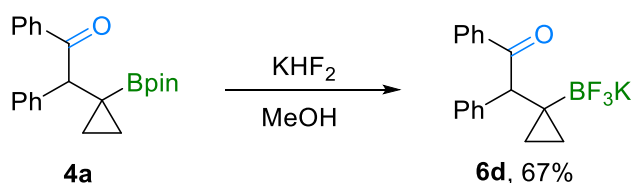

#### 1,2-Diphenyl-2-(1-(trifluoro-14-boranyl)cyclopropyl)ethan-1-one, potassium salt (**6d**)

The title compound was synthesized according to the following procedure: To the boration product **4a** (72.4 mg, 0.2 mmol) in MeOH (5.0 mL) and  $\text{H}_2\text{O}$  (0.4 mL) was added  $\text{KHF}_2$  (140.0 mg, 4.5 M). The reaction mixture was stirred vigorously for 3 h at room temperature. The resulting slurry was stirred

concentrated, then placed under high vacuum. The dried solids were triturated with hot acetone and filtered to remove inorganic salts. The resulting filtrate was concentrated to a minimal volume and Et<sub>2</sub>O was added to afford 6d as a white solid (45.6 mg, 67%).

**<sup>1</sup>H NMR (300 MHz, *d*<sub>6</sub>-Acetone)** δ 8.04 – 7.99 (m, 2H), 7.47 – 7.35 (m, 3H), 7.31 (ddd, *J* = 8.2, 1.7, 0.9 Hz, 2H), 7.24 – 7.18 (m, 2H), 7.15 – 7.08 (m, 1H), 5.18 (s, 1H), 0.46 – 0.35 (m, 1H), 0.14 (dd, *J* = 7.3, 1.8 Hz, 2H), -0.35 – -0.47 (m, 1H).

**<sup>13</sup>C NMR (75 MHz, *d*<sub>6</sub>-Acetone)** δ 203.7, 140.3, 140.2, 132.7, 131.1, 129.4, 129.0, 128.4, 126.8, 55.4, 5.7, 4.9.

**<sup>11</sup>B NMR (96 MHz, *d*<sub>6</sub>-Acetone)** δ 4.3.

**IR (ATR):** 1676, 1228, 1043, 1006, 972, 752, 700, 685, 649, 537, 482 cm<sup>-1</sup>.

## 7. References

- [1] Y. Wang, M. E. Muratore, Z. Rong, A. M. Echavarren, *Angew. Chem., Int. Ed.* **2014**, *53*, 14022.
- [2] J.-E. Lee, J. Yun, *Angew. Chem. Int. Ed.* **2008**, *47*, 145.
- [3] C. Wu, S. Ge, *Chem. Sci.* **2020**, *11*, 2783.
- [4] K. Endo, M. Hirokami, T. Shibata, *T. J. Org. Chem.* 2010, **75**, 3469.
- [5] M. Xiong, X. Xie, Y. Liu, *Org. Lett.* **2017**, *19*, 3398.

# 8. NMR Spectra of the $\gamma$ -vinylboryl ketones, $\beta$ -cyclopropylboryl ketones and BCPs

## 8.1 NMR spectra of the $\gamma$ -vinylboryl ketones and $\beta$ -cyclopropylboryl ketones

210917.f335.10.fid — Fupeng Wu Ub-1 — PROTON CDCl<sub>3</sub> {C:\Bruker\TopSpin3.6.2} 2109 35 — 300.20MHz

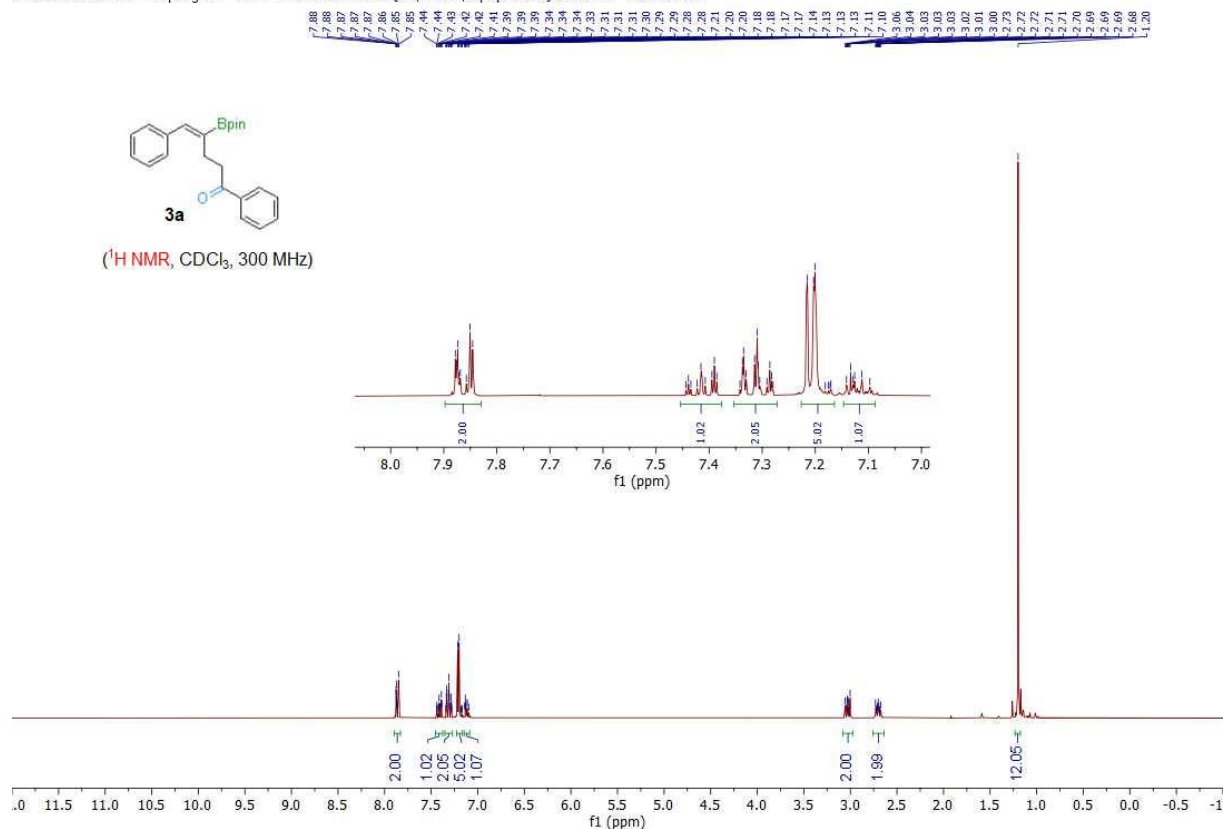

210917.f335.11.fid — Fupeng Wu Ub-1 — C13CPD CDCl<sub>3</sub> {C:\Bruker\TopSpin3.6.2} 2109 35 — 75.49MHz

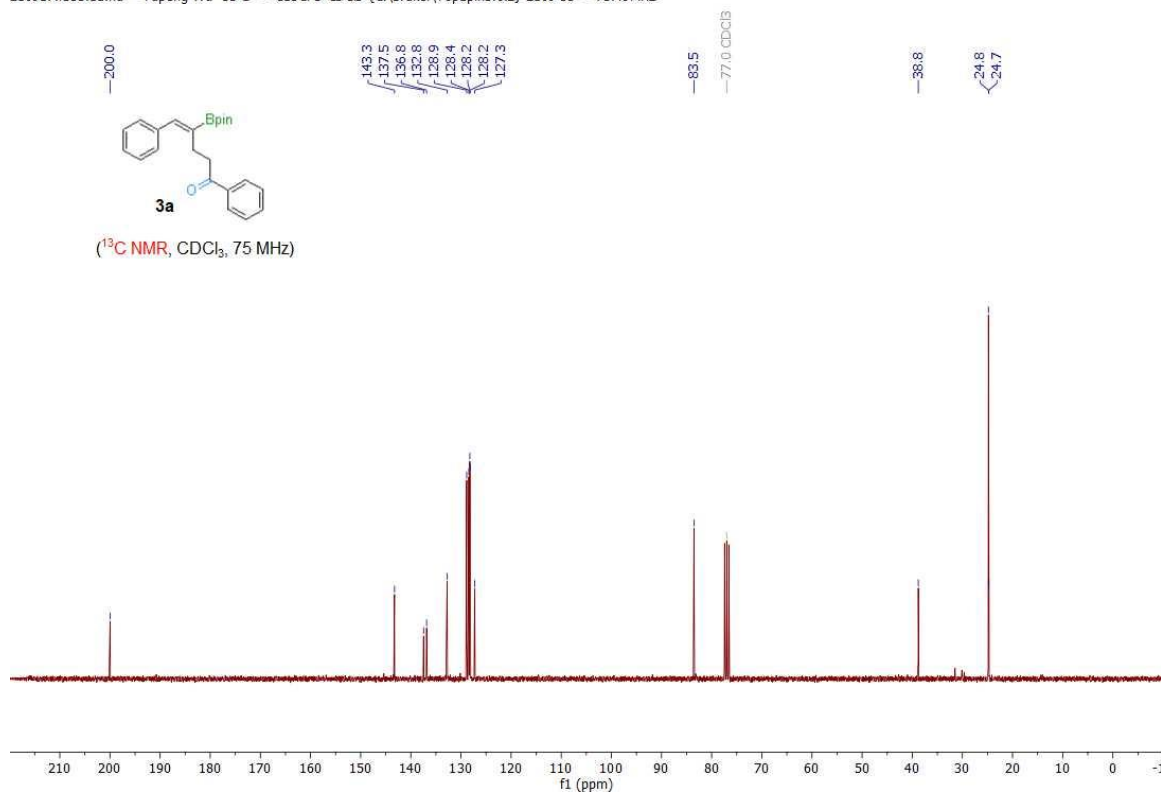

—30.3

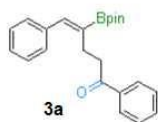

(<sup>11</sup>B NMR, CDCl<sub>3</sub>, 96 MHz)

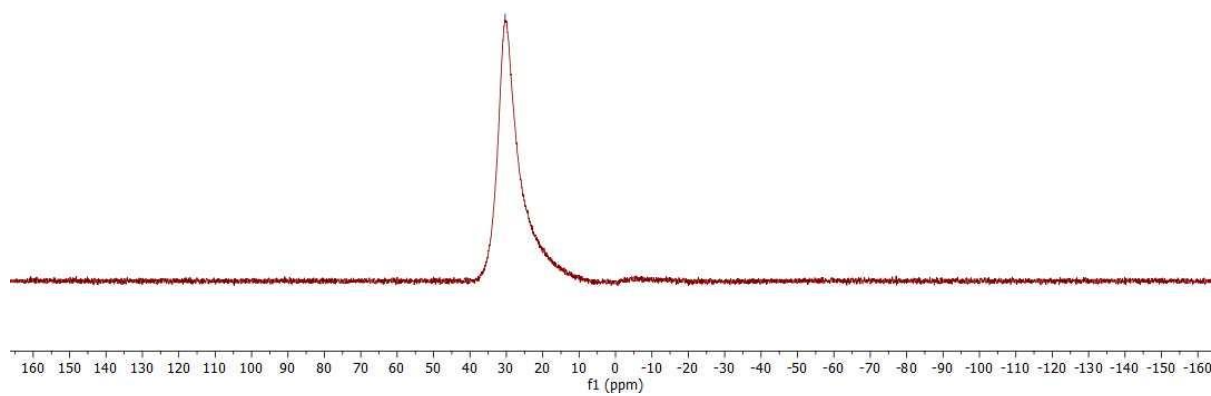

211021.f341.10.fid — Fupeng Wu Ub-21 — PROTON CDCl3 {C:\Bruker\TopSpin3.6.2} 2110 41 — 300.20MHz

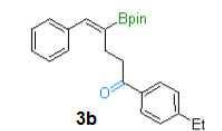

(<sup>1</sup>H NMR, CDCl<sub>3</sub>, 300 MHz)

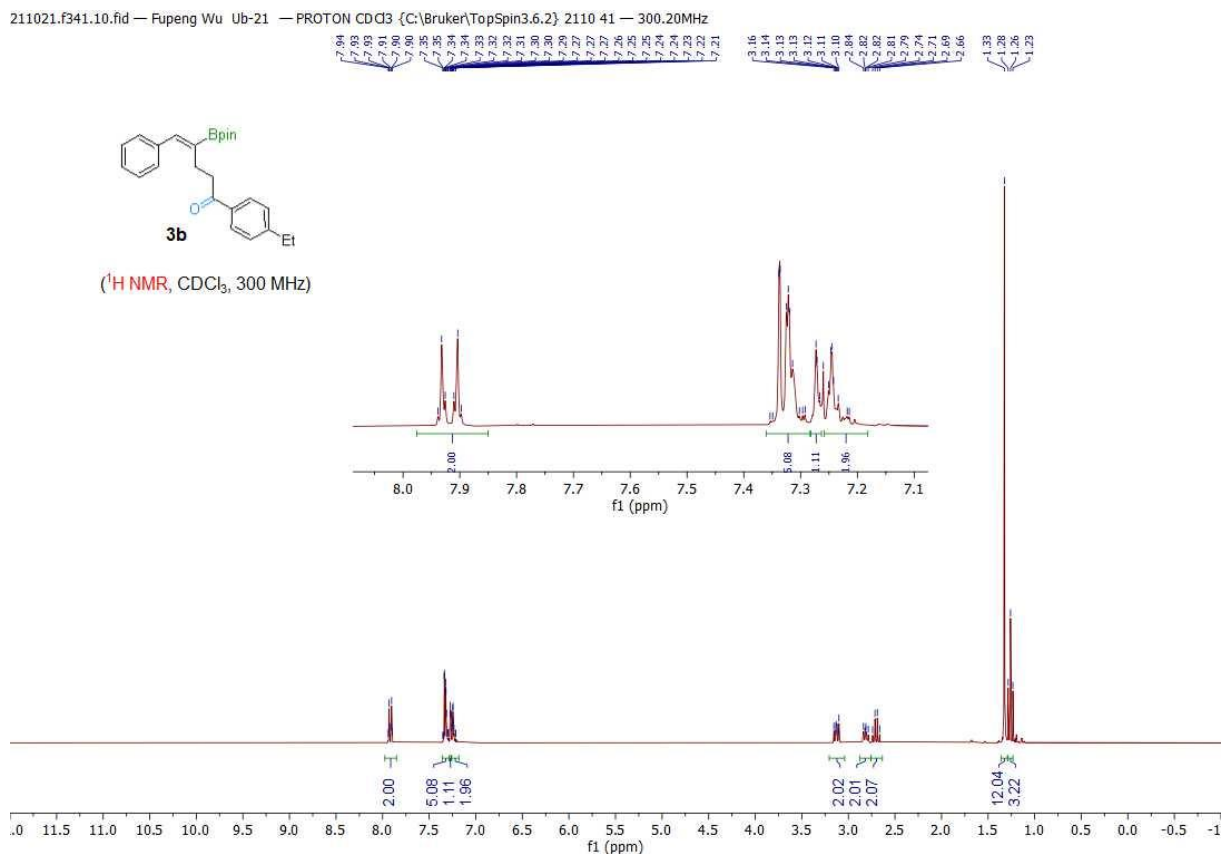

211021.f341.11.fid — Fupeng Wu Ub-21 — C13CPD CDCl3 {C:\Bruker\TopSpin3.6.2} 2110 41 — 75.49MHz

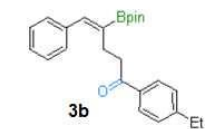

(<sup>13</sup>C NMR, CDCl<sub>3</sub>, 75 MHz)

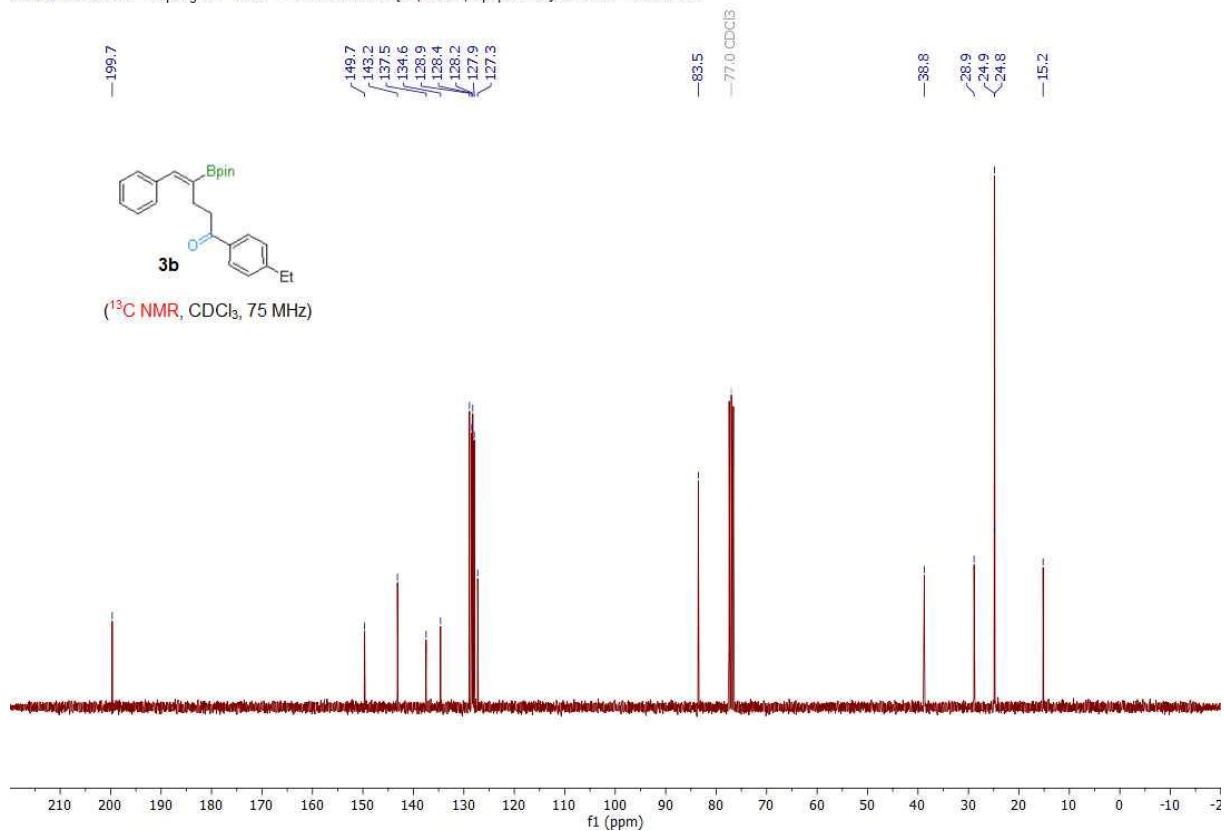

—30.3

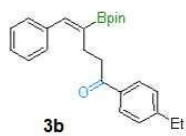

(<sup>11</sup>B NMR, CDCl<sub>3</sub>, 96 MHz)

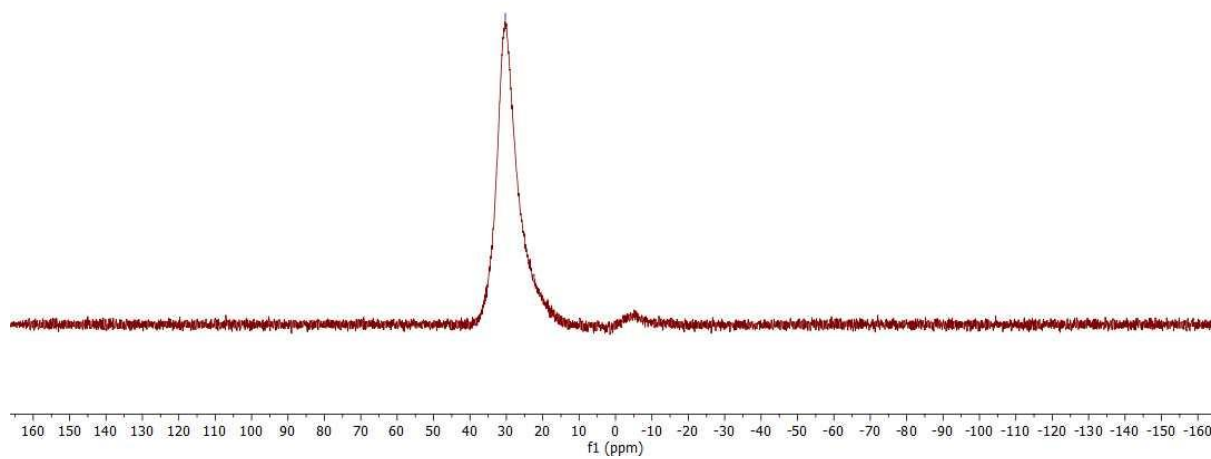

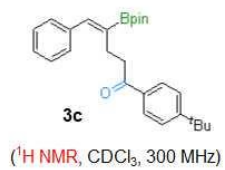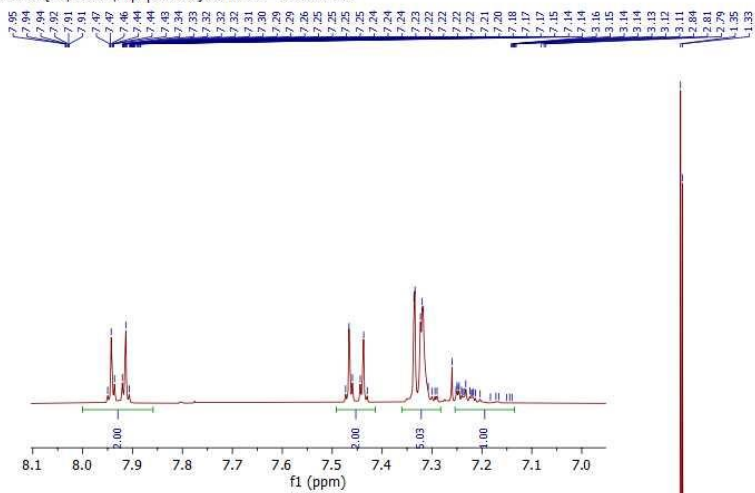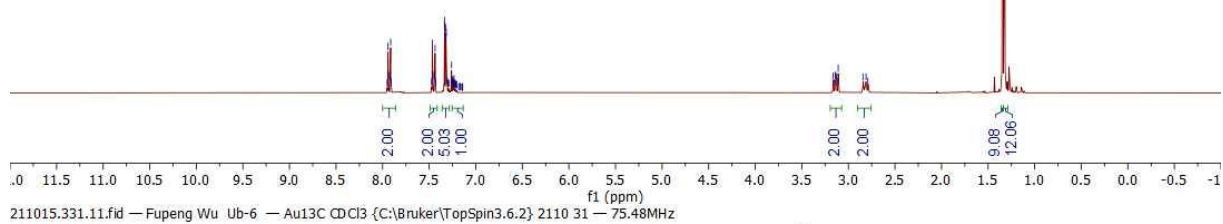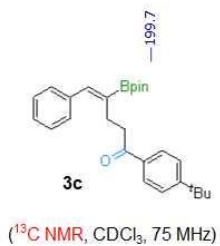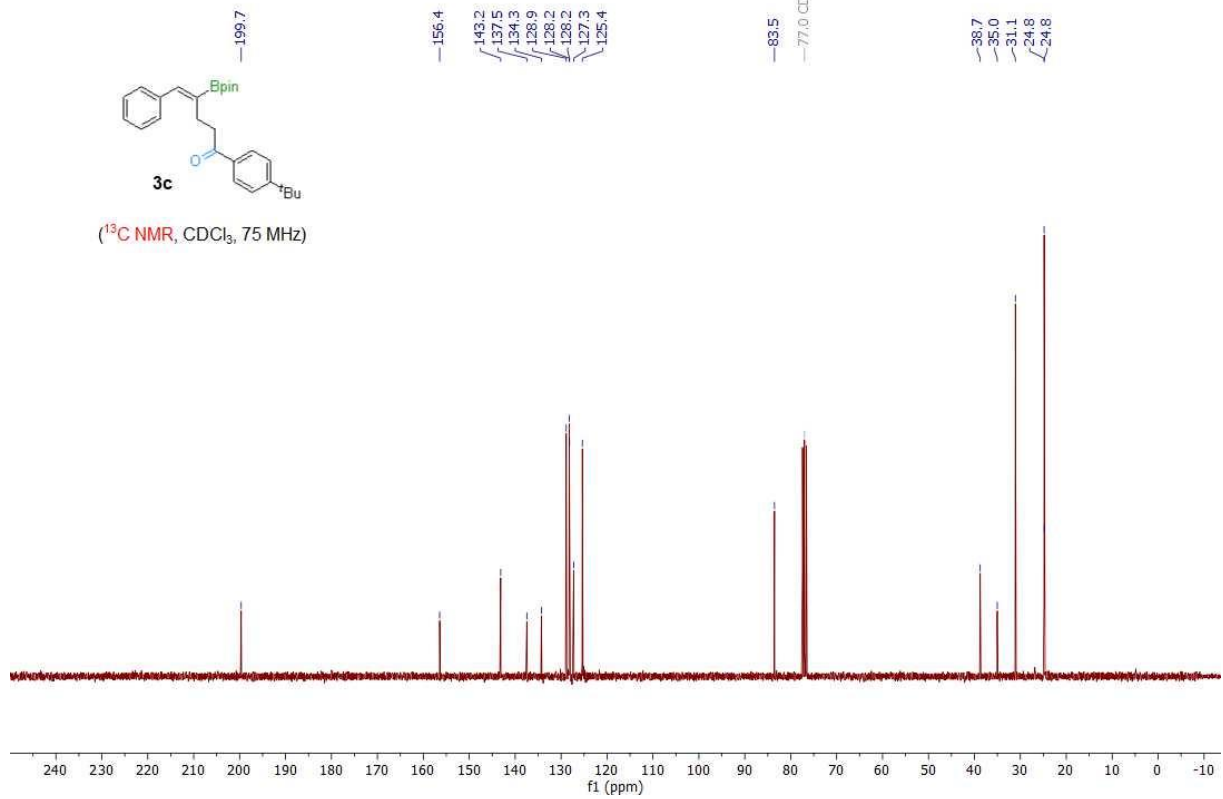



—30.2

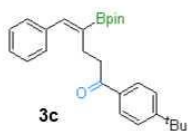

(<sup>11</sup>B NMR, CDCl<sub>3</sub>, 96 MHz)

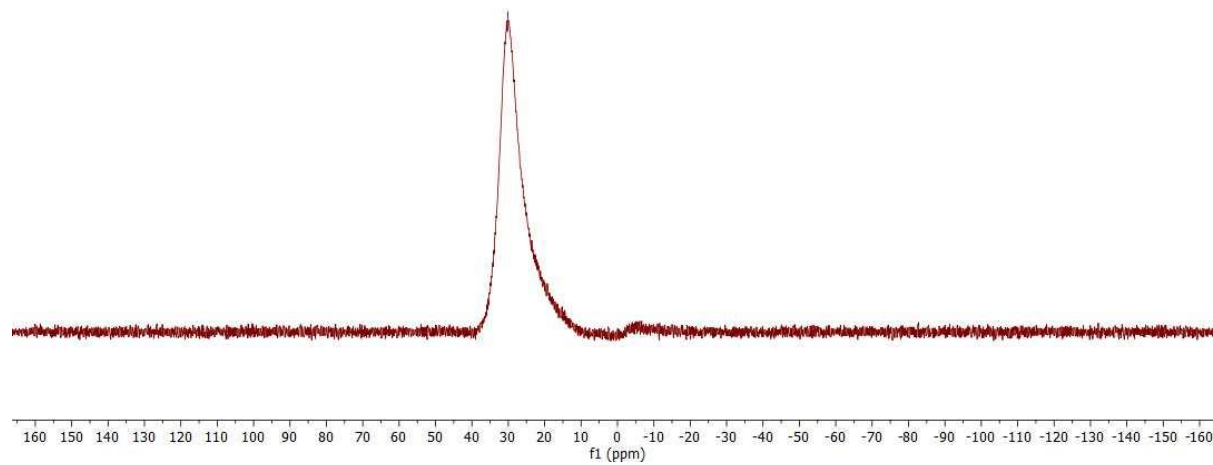

211019.329.10.fid — Fupeng Wu Ub-4-1 — Au1H CDCl3 {C:\Bruker\TopSpin3.6.2} 2110 29 — 300.13MHz

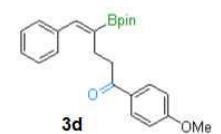

(<sup>1</sup>H NMR, CDCl<sub>3</sub>, 300 MHz)

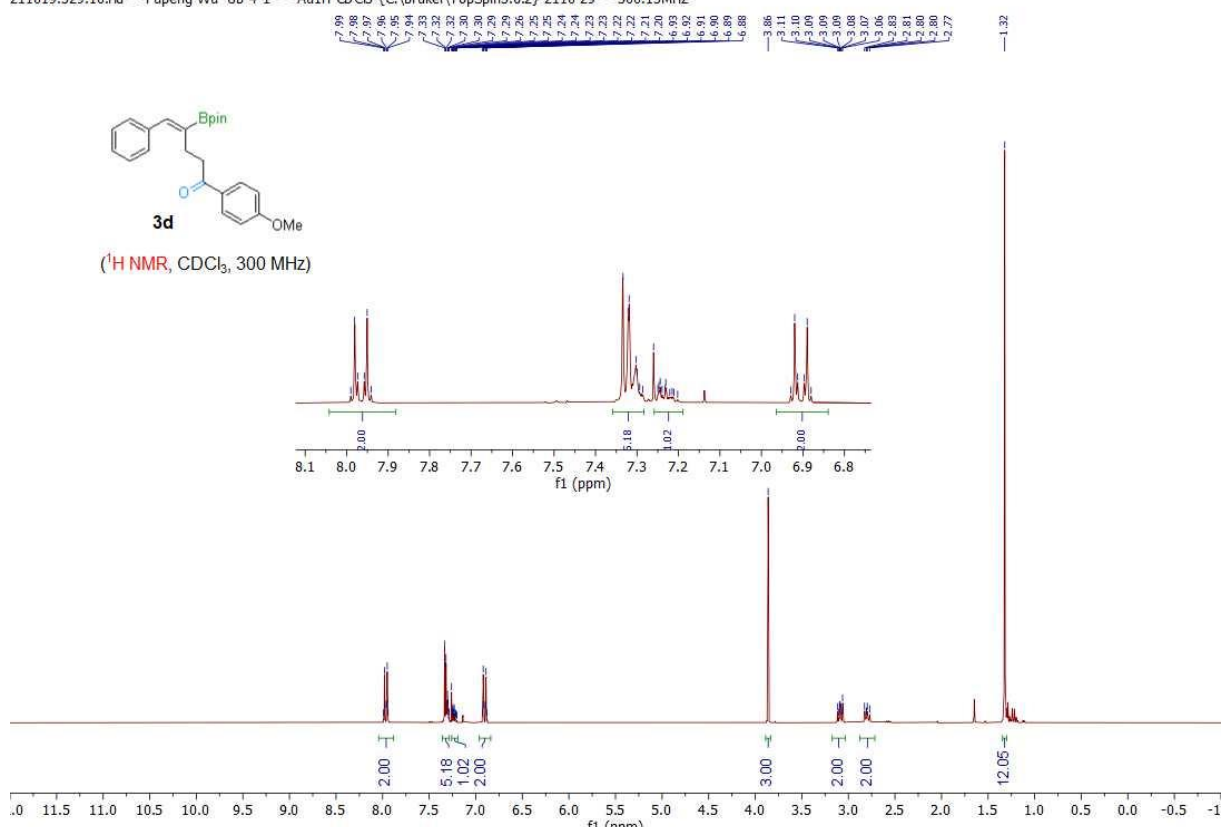

211019.329.11.fid — Fupeng Wu Ub-4-1 — Au13C CDCl3 {C:\Bruker\TopSpin3.6.2} 2110 29 — 75.48MHz

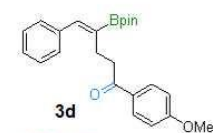

(<sup>13</sup>C NMR, CDCl<sub>3</sub>, 75 MHz)

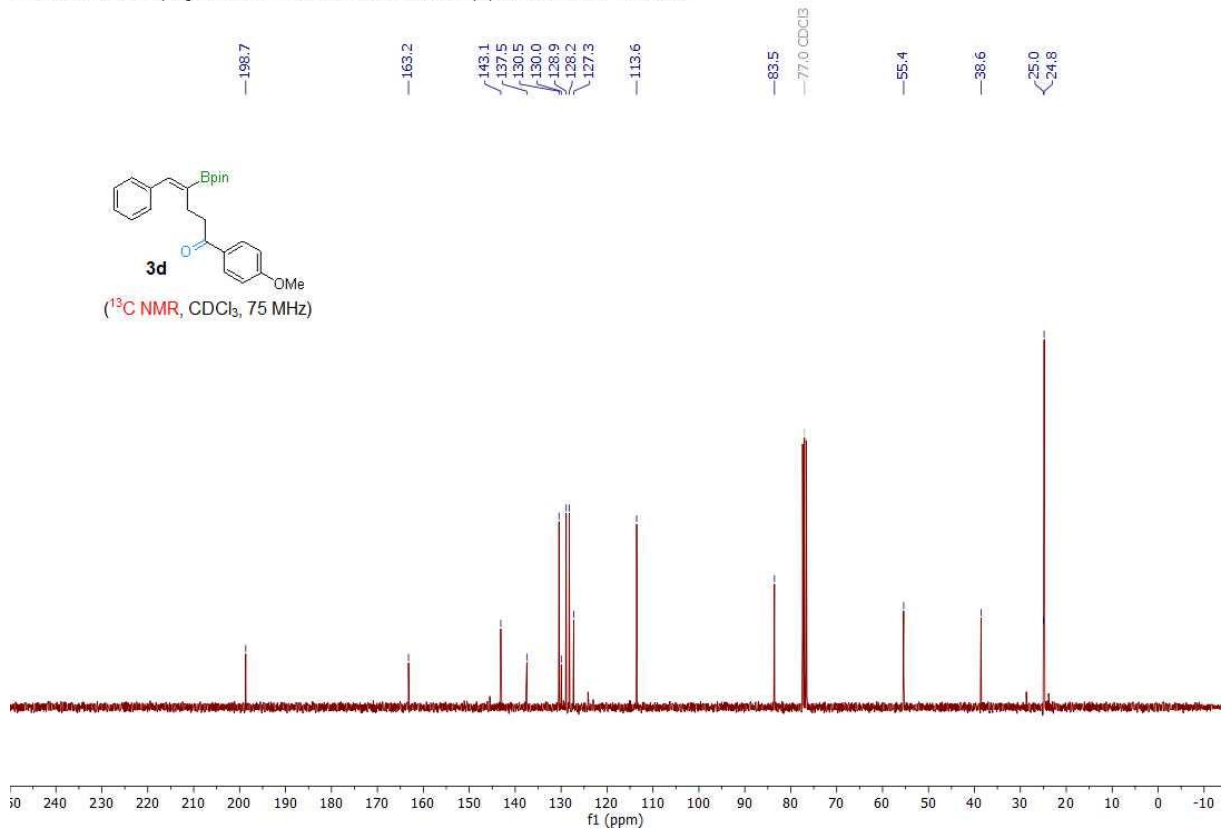

—30.1

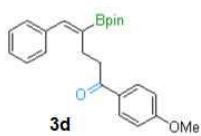

(<sup>11</sup>B NMR, CDCl<sub>3</sub>, 96 MHz)

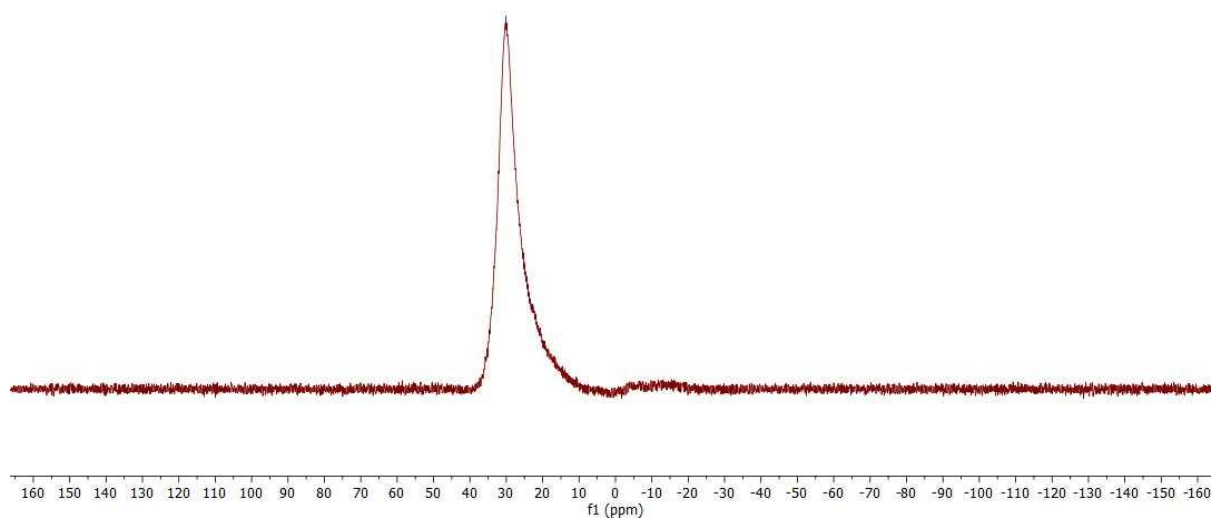

211026.329.10.fid — Fupeng Wu, Ub-27 — Au1H CDCl3 {C:\Bruker\TopSpin3.6.2} 2110 29 — 300.13MHz

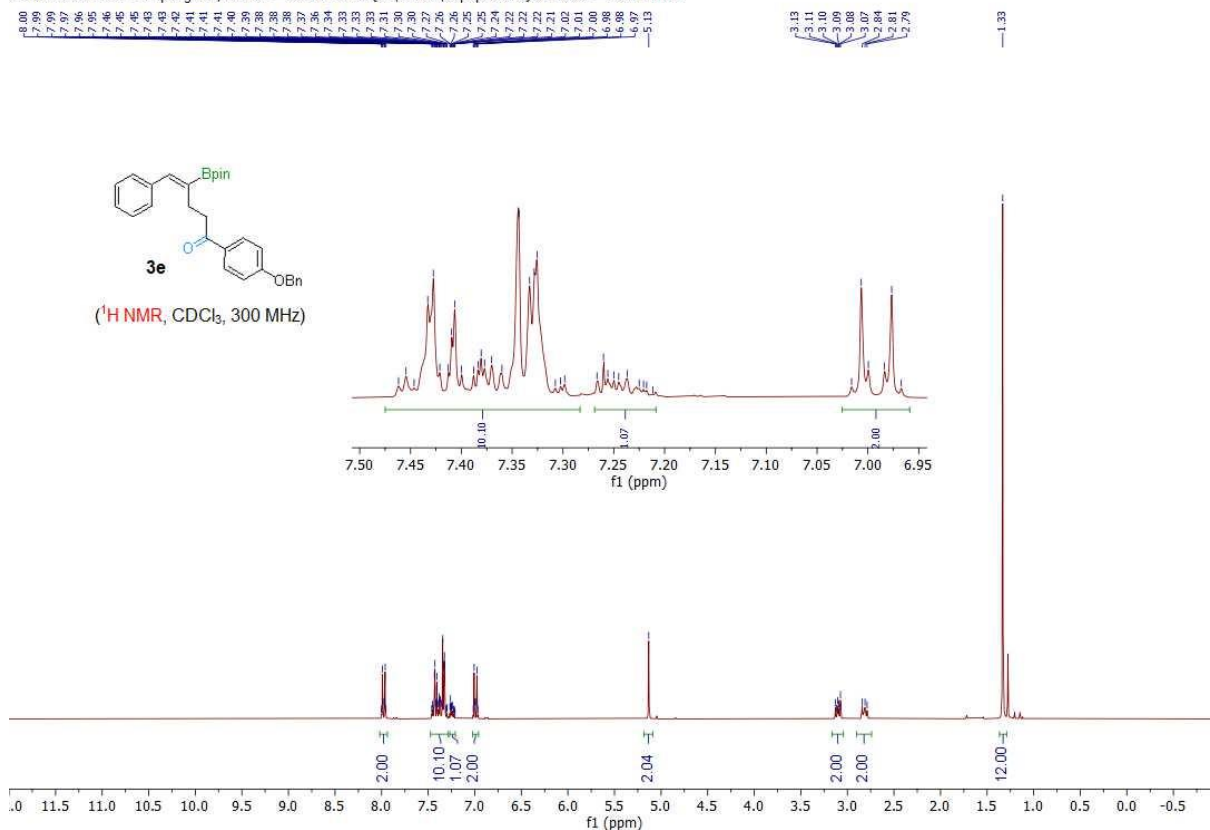

211026.329.12.fid — Fupeng Wu, Ub-27 — Au13C CDCl3 {C:\Bruker\TopSpin3.6.2} 2110 29 — 75.48MHz

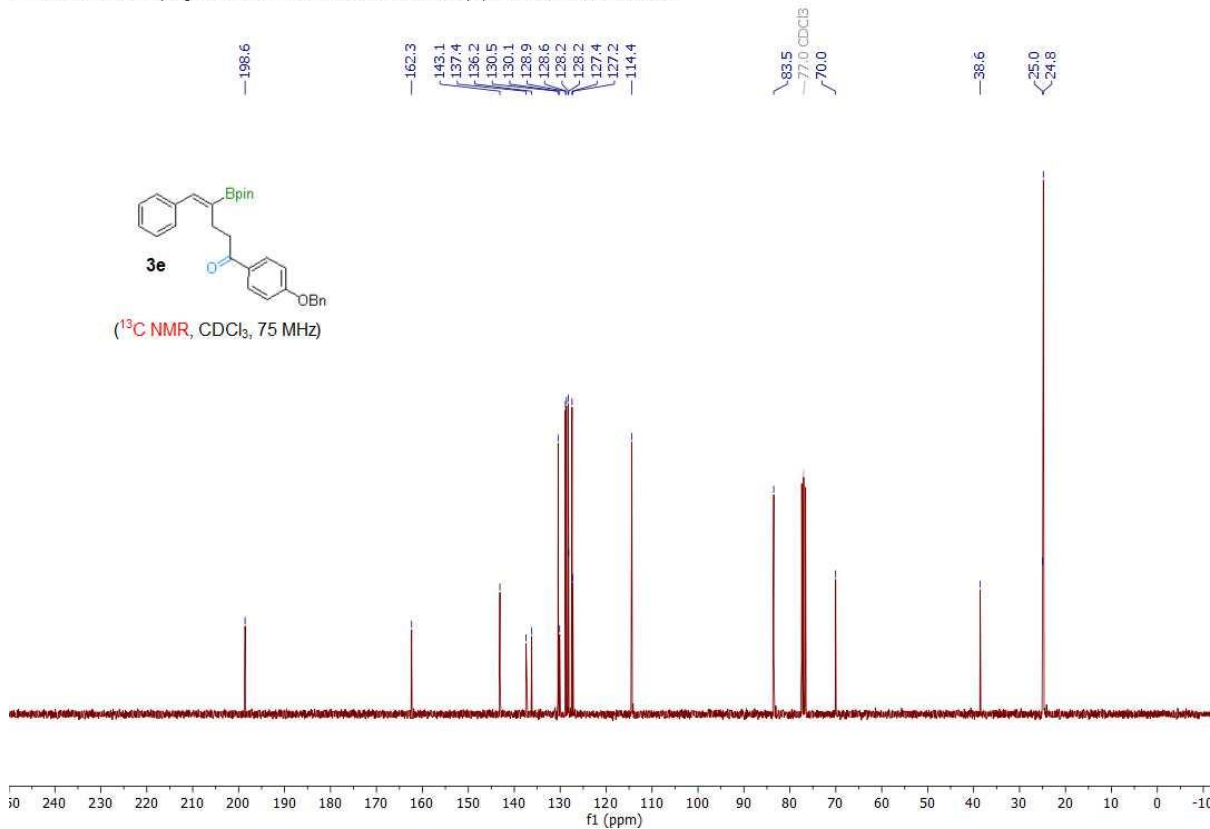

—30.1

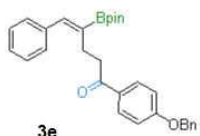

(<sup>11</sup>B NMR, CDCl<sub>3</sub>, 96 MHz)

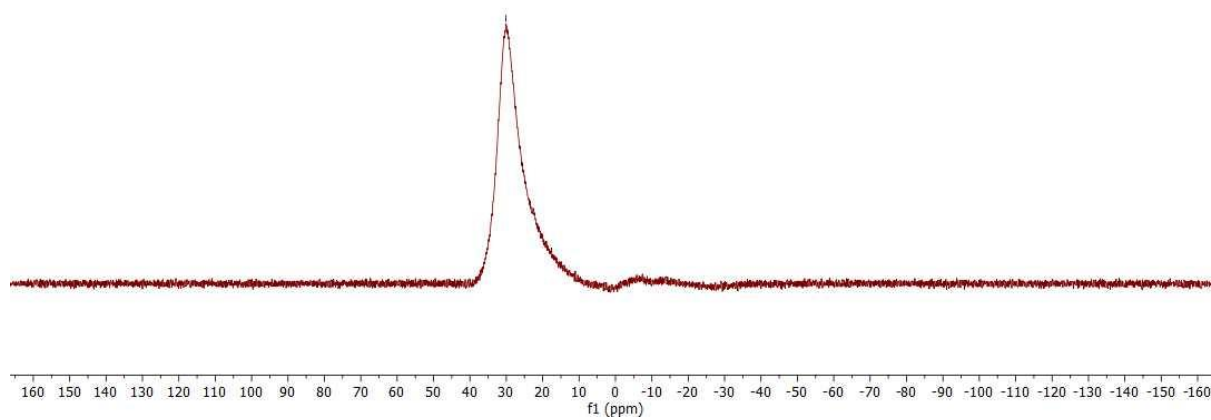

211015.330.10.fid — Fupeng Wu Ub-5 — Au1H CDCl3 {C:\Bruker\TopSpin3.6.2} 2110 30 — 300.13MHz

7.94  
7.93  
7.92  
7.91  
7.90  
7.89  
7.82  
7.81  
7.80  
7.79  
7.78  
7.77  
7.76  
7.75  
7.74  
7.73  
7.72  
7.71  
7.19  
3.13  
3.11  
3.10  
3.09  
3.08  
3.07  
3.06  
2.78  
1.32

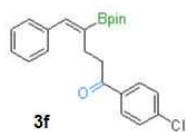

(<sup>1</sup>H NMR, CDCl<sub>3</sub>, 300 MHz)

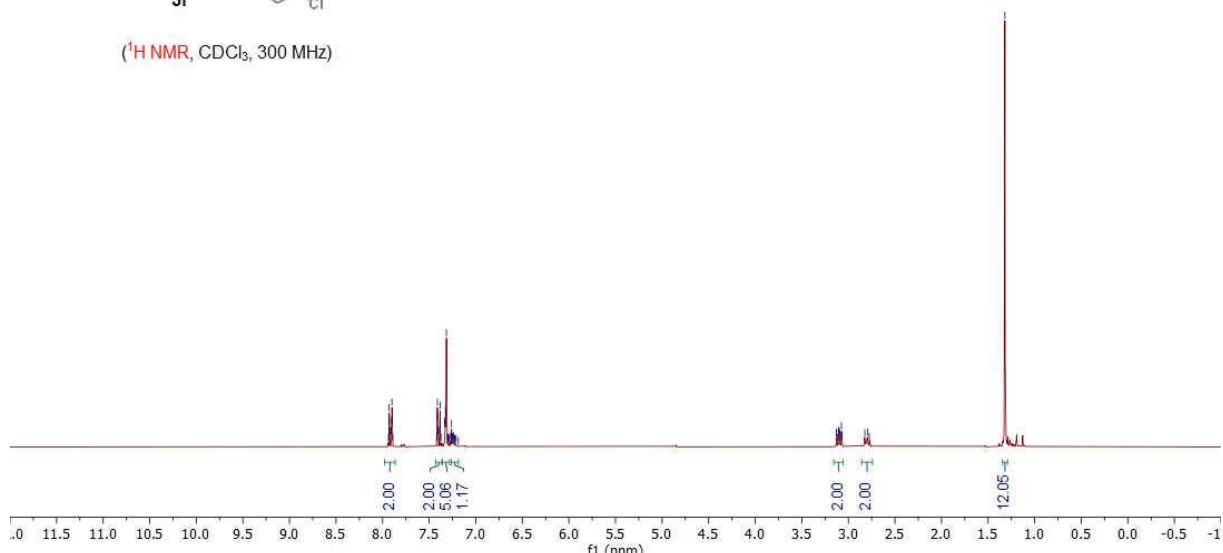

211015.330.11.fid — Fupeng Wu Ub-5 — Au13C CDCl3 {C:\Bruker\TopSpin3.6.2} 2110 30 — 75.48MHz

198.8

143.5  
139.2  
137.4  
135.1  
130.7  
128.8  
128.7  
128.3  
127.3

83.6  
77.0 CDCl3

38.8

24.8  
24.8

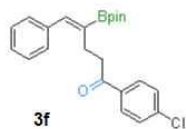

(<sup>13</sup>C NMR, CDCl<sub>3</sub>, 75 MHz)

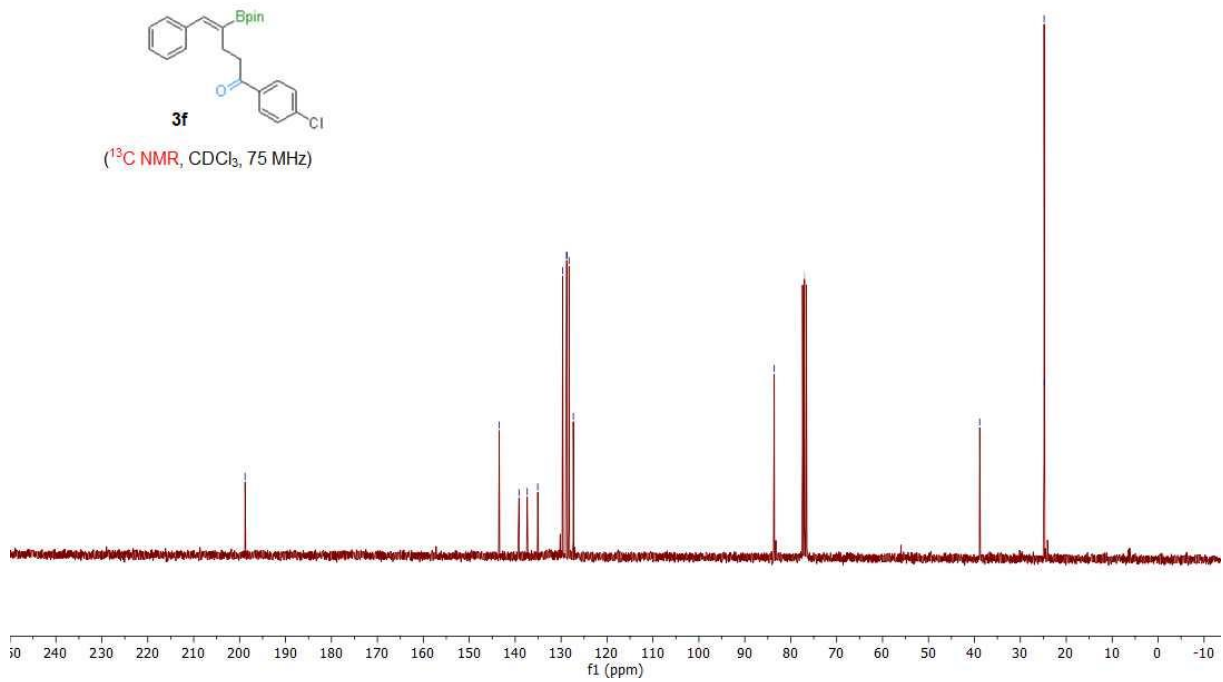

—30.3

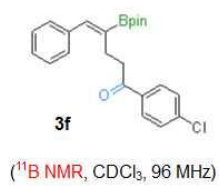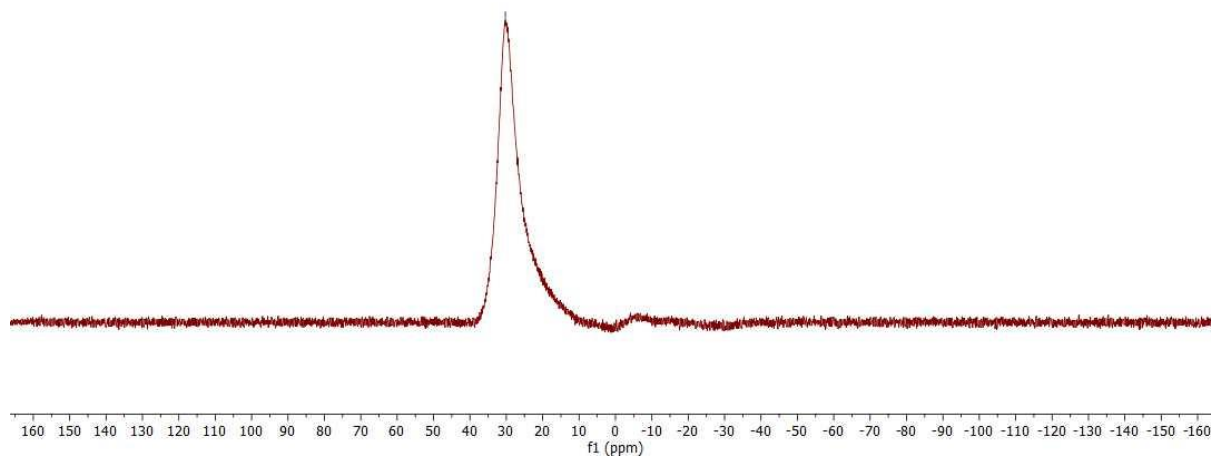

211022.337.10.fid — Fupeng Wu Ub-20 — Au1H CDCl3 {C:\Bruker\TopSpin3.6.2} 2110 37 — 300.13MHz

7.86  
7.85  
7.83  
7.82  
7.59  
7.58  
7.57  
7.55  
7.54  
7.36  
7.35  
7.33  
7.32  
7.31  
7.30  
7.29  
7.28  
7.25  
7.24  
7.23  
7.22  
7.21  
3.12  
3.11  
3.10  
3.09  
3.08  
2.82  
2.81  
2.80  
2.79  
2.77  
-1.32

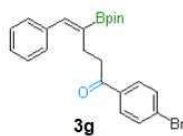

(<sup>1</sup>H NMR, CDCl<sub>3</sub>, 300 MHz)

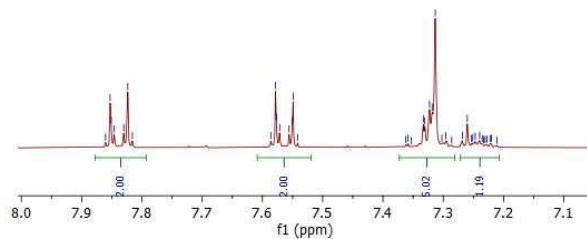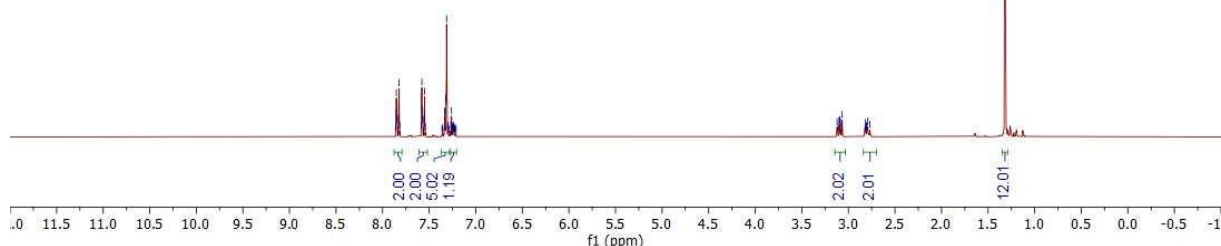

211022.337.11.fid — Fupeng Wu Ub-20 — Au13C CDCl3 {C:\Bruker\TopSpin3.6.2} 2110 37 — 75.48MHz

199.0  
143.5  
137.4  
136.5  
131.7  
129.8  
128.8  
128.3  
127.9  
127.3  
83.6  
77.0 CDCl3  
38.8  
24.8  
24.8

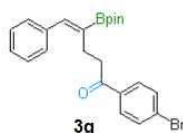

(<sup>13</sup>C NMR, CDCl<sub>3</sub>, 75 MHz)

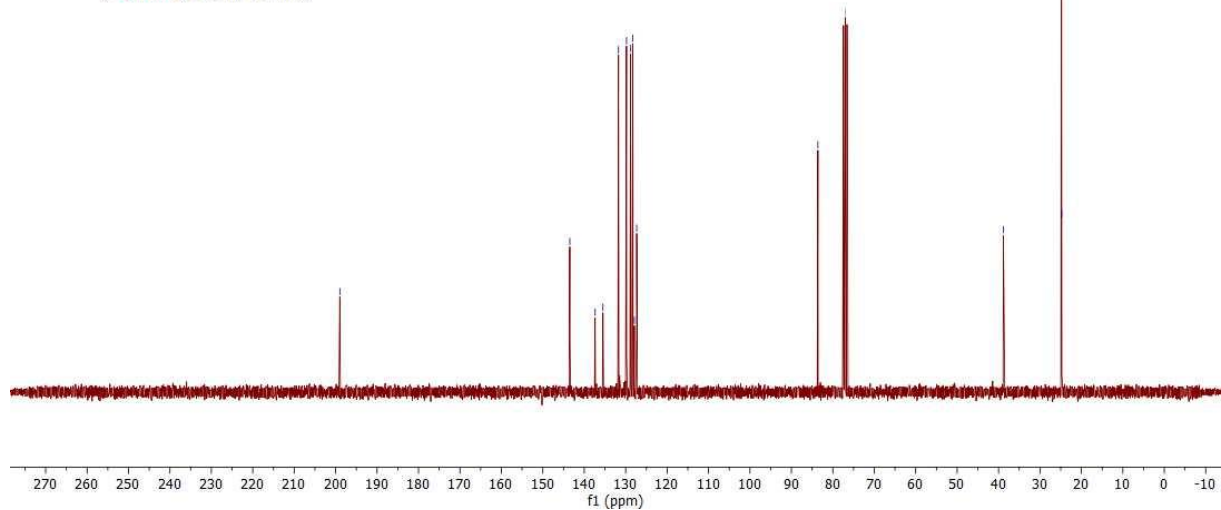



30.0

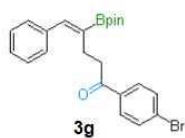

(<sup>11</sup>B NMR, CDCl<sub>3</sub>, 96 MHz)

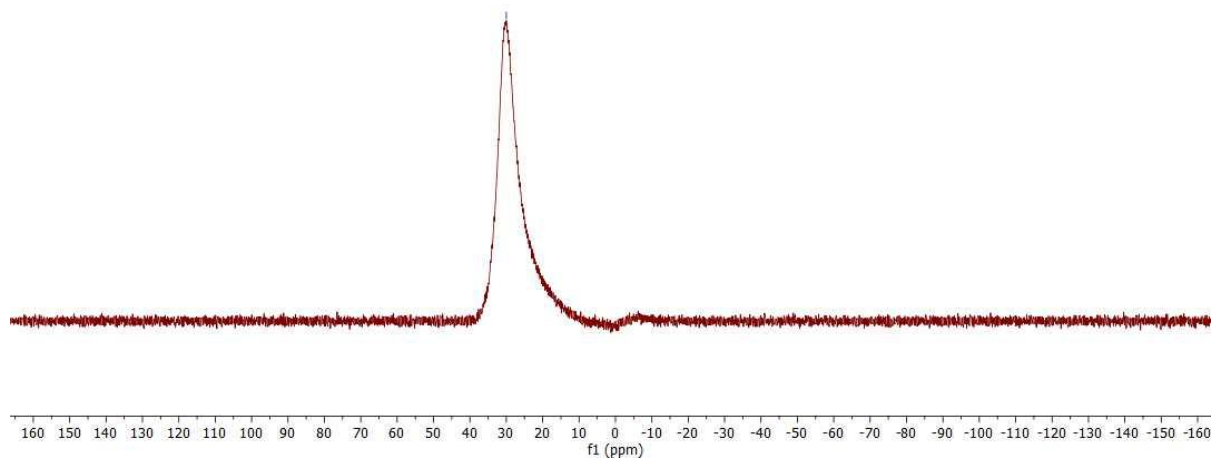

211021.f340.10.fid — Fupeng Wu Ub-14 — PROTON CDCl3 {C:\Bruker\TopSpin3.6.2} 2110 40 — 300.20MHz

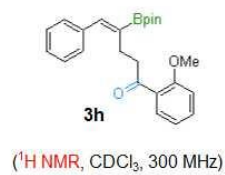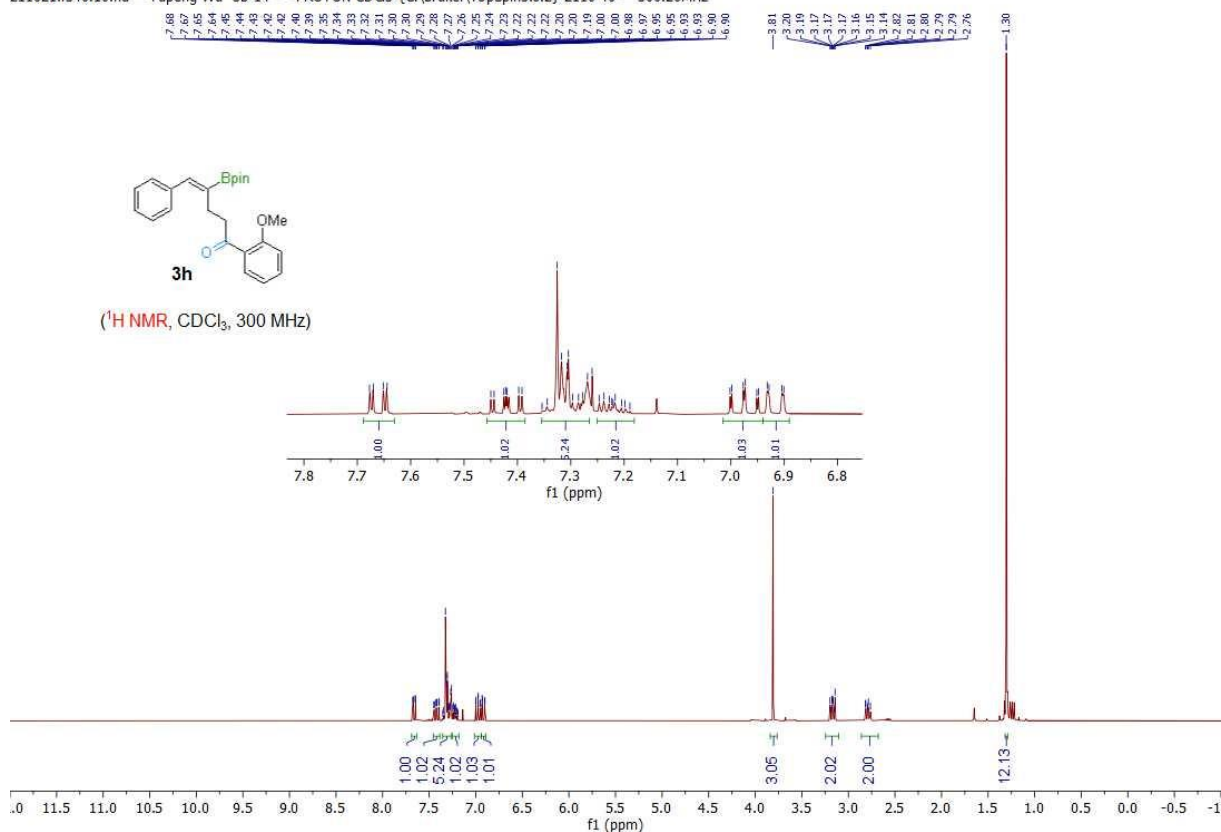

211021.f340.11.fid — Fupeng Wu Ub-14 — C13CPD CDCl3 {C:\Bruker\TopSpin3.6.2} 2110 40 — 75.49MHz

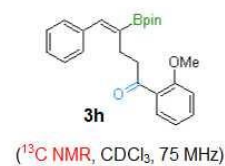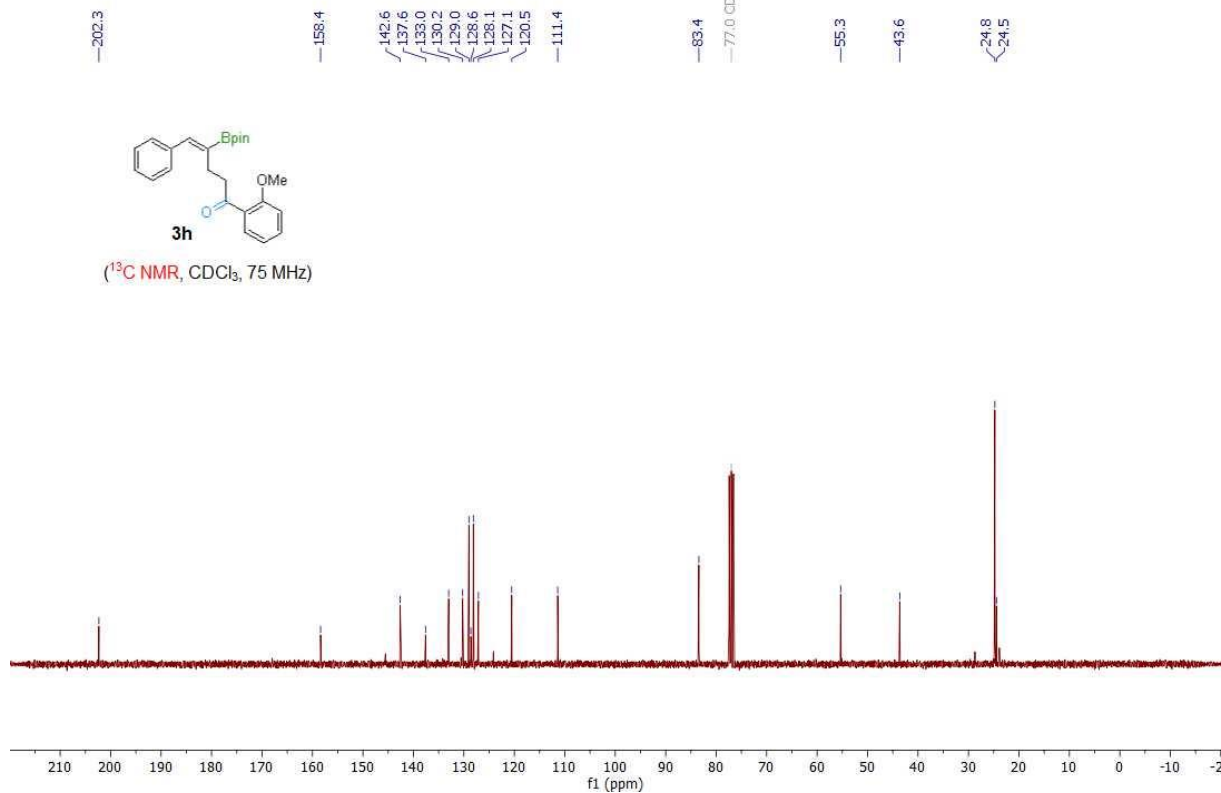

—30.3

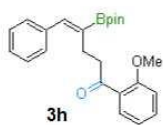

(<sup>11</sup>B NMR, CDCl<sub>3</sub>, 96 MHz)

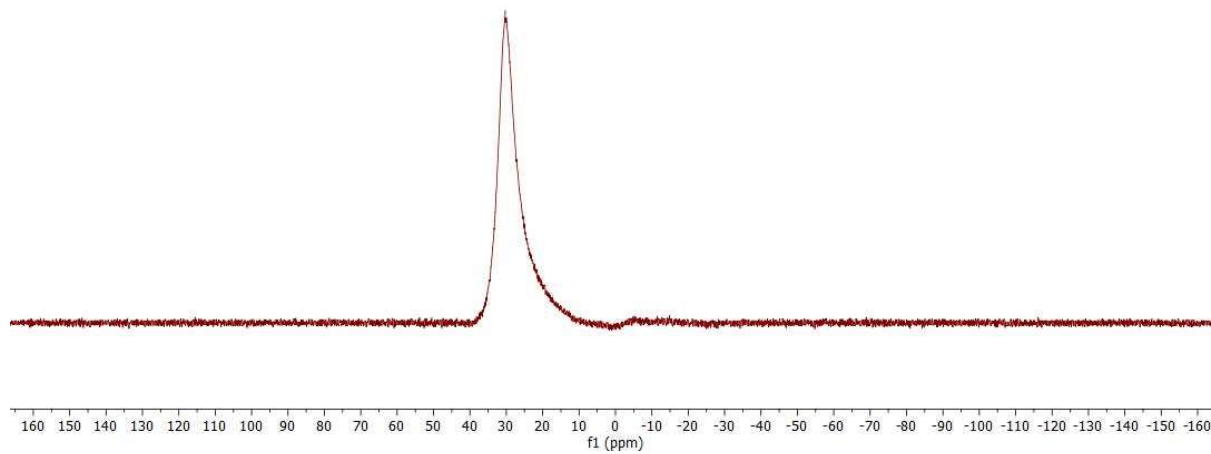

211018.f331.10.fid — Fupeng Wu Ub-9 — PROTON CDCl3 {C:\Bruker\TopSpin3.6.2} 2110 31 — 300.20MHz

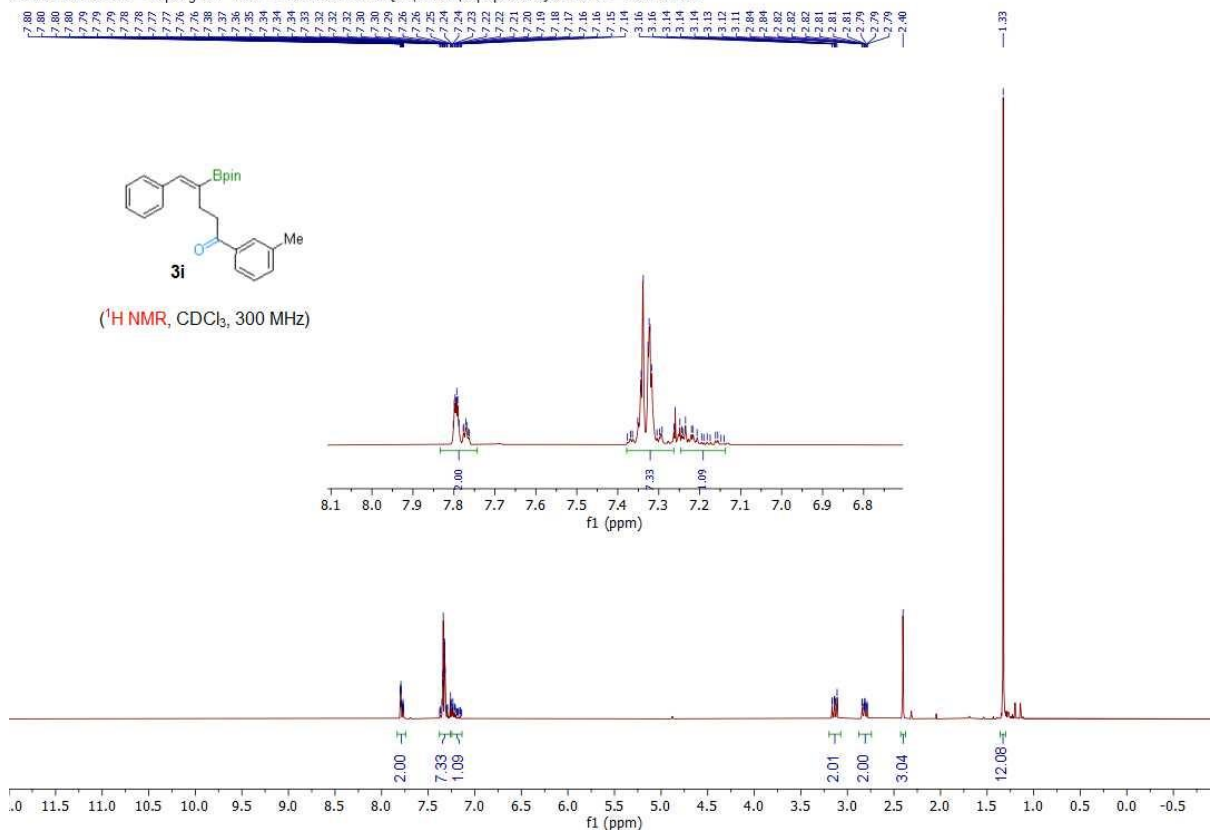

211018.f331.11.fid — Fupeng Wu Ub-9 — C13CPD CDCl3 {C:\Bruker\TopSpin3.6.2} 2110 31 — 75.49MHz

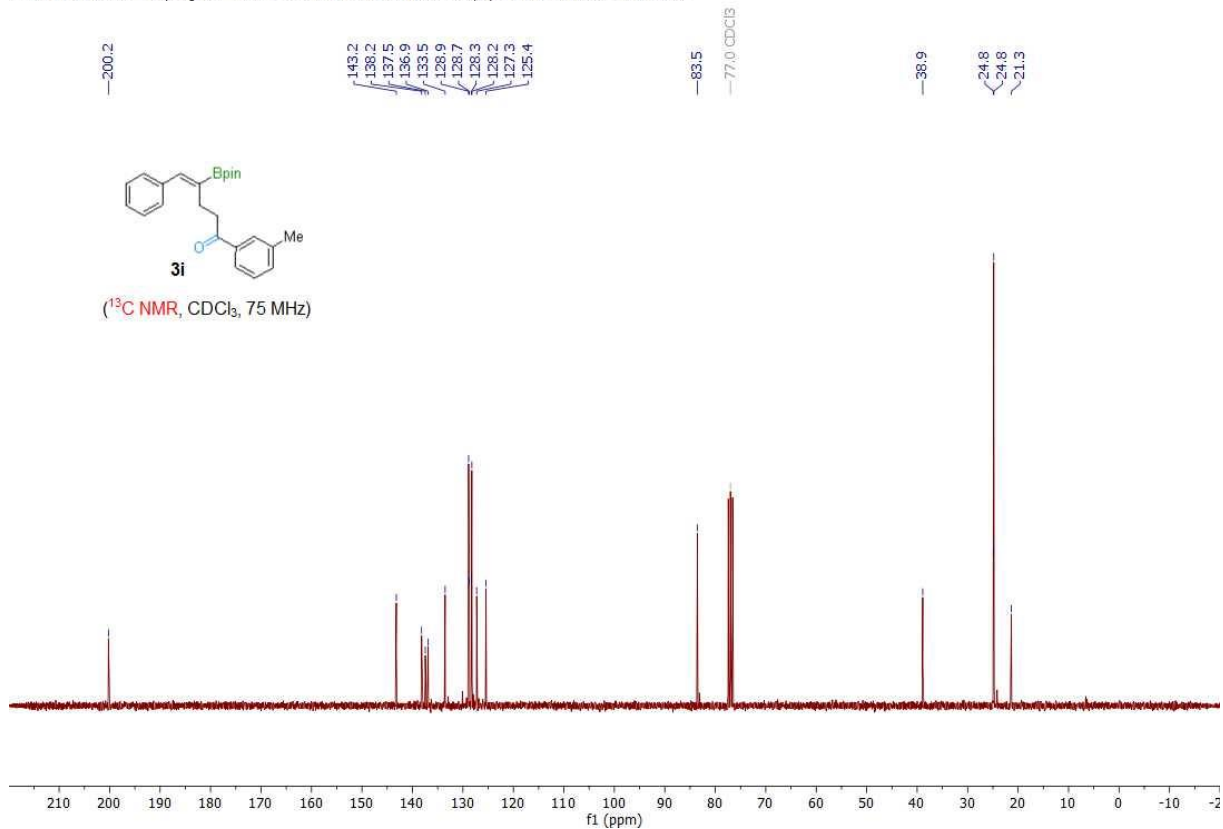

—30.1

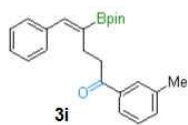

(<sup>11</sup>B NMR, CDCl<sub>3</sub>, 96 MHz)

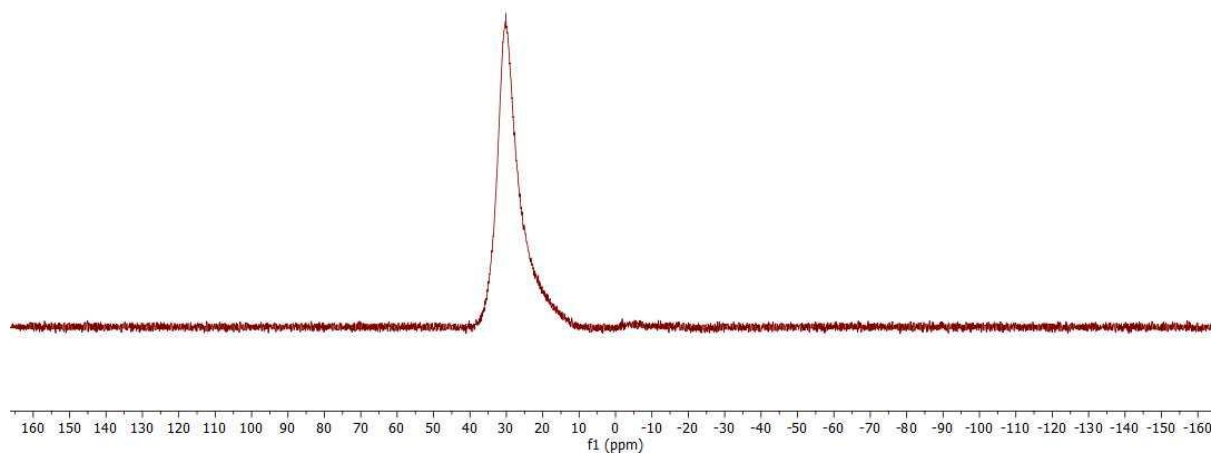

211018.f332.10.fid — Fupeng Wu Ub-11 — PROTON CDCl3 {C:\Bruker\TopSpin3.6.2} 2110 32 — 300.20MHz

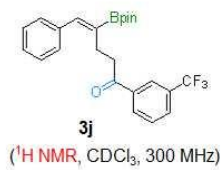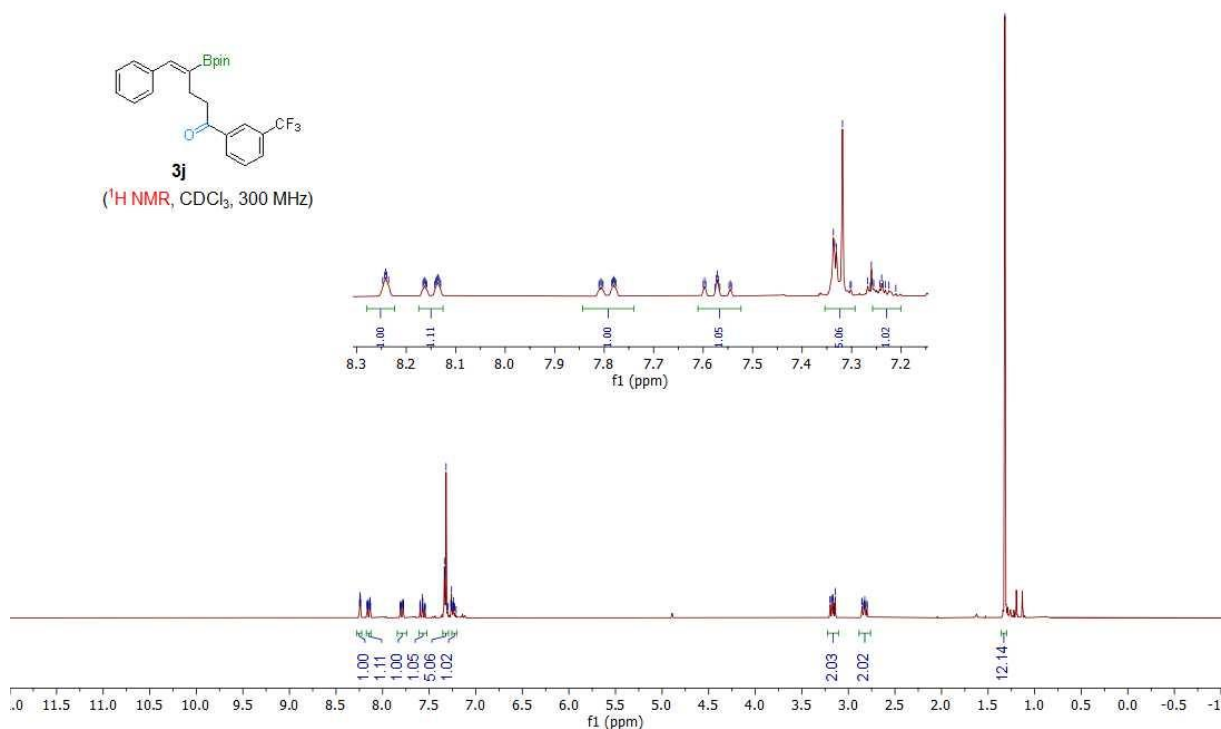

211018.f332.11.fid — Fupeng Wu Ub-11 — C13CPD CDCl3 {C:\Bruker\TopSpin3.6.2} 2110 32 — 75.49MHz

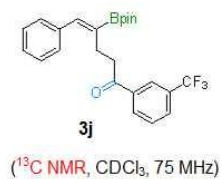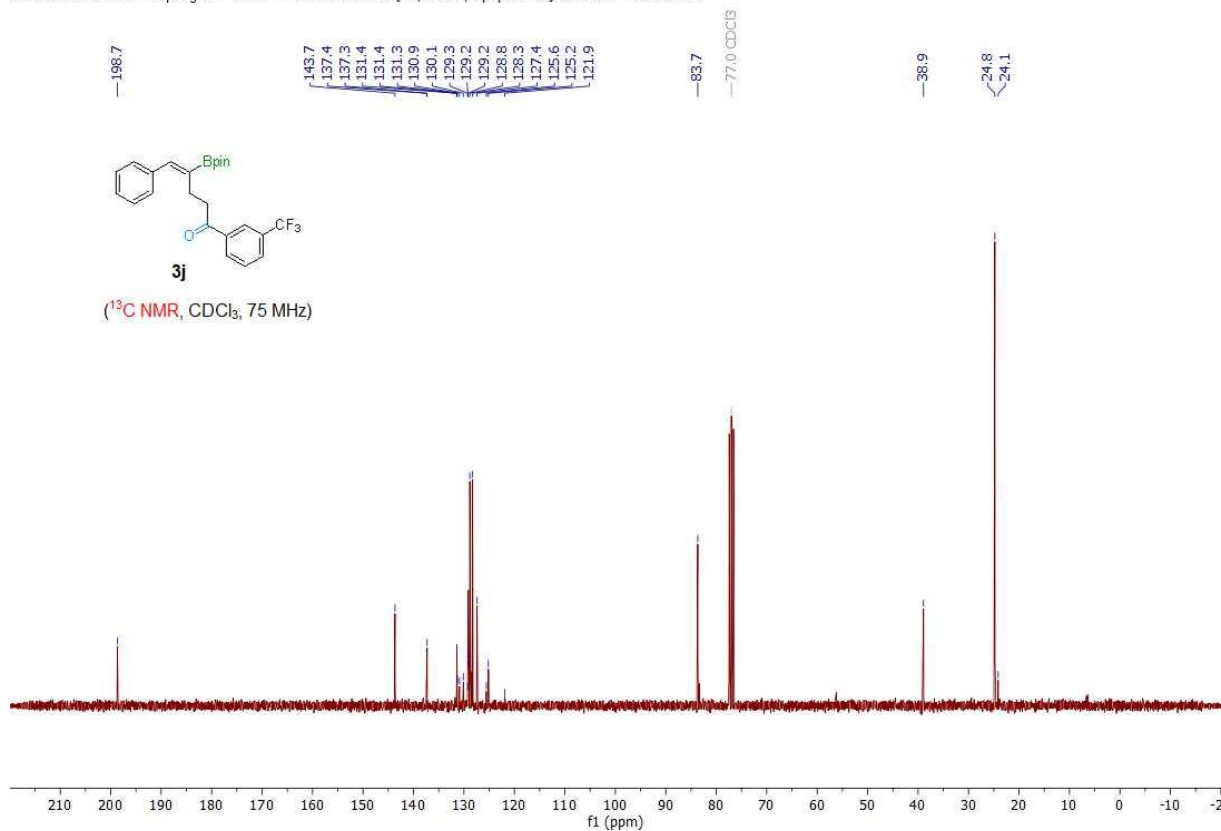

—30.3

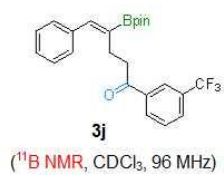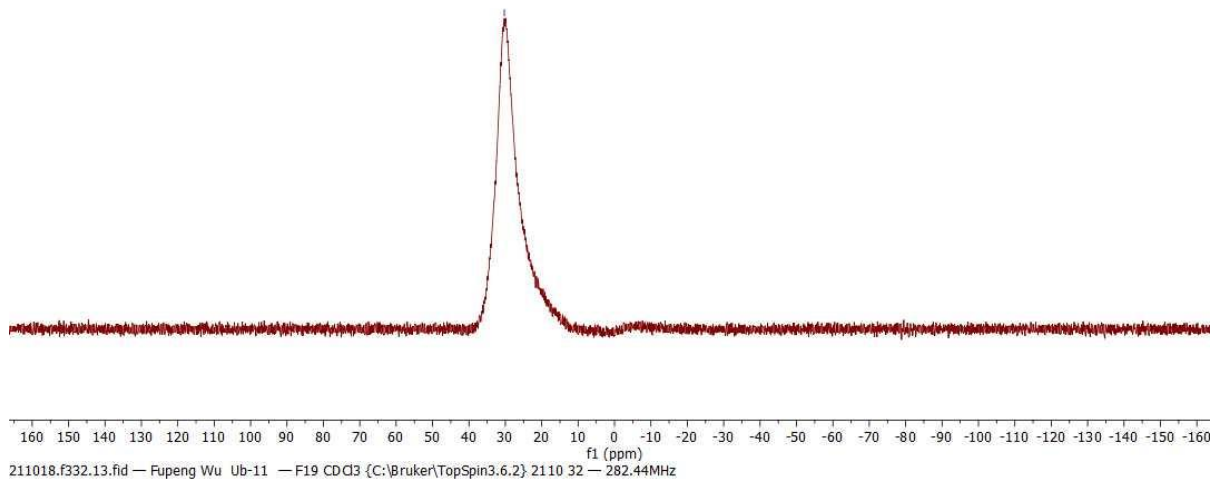

—62.7

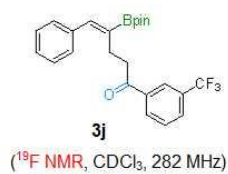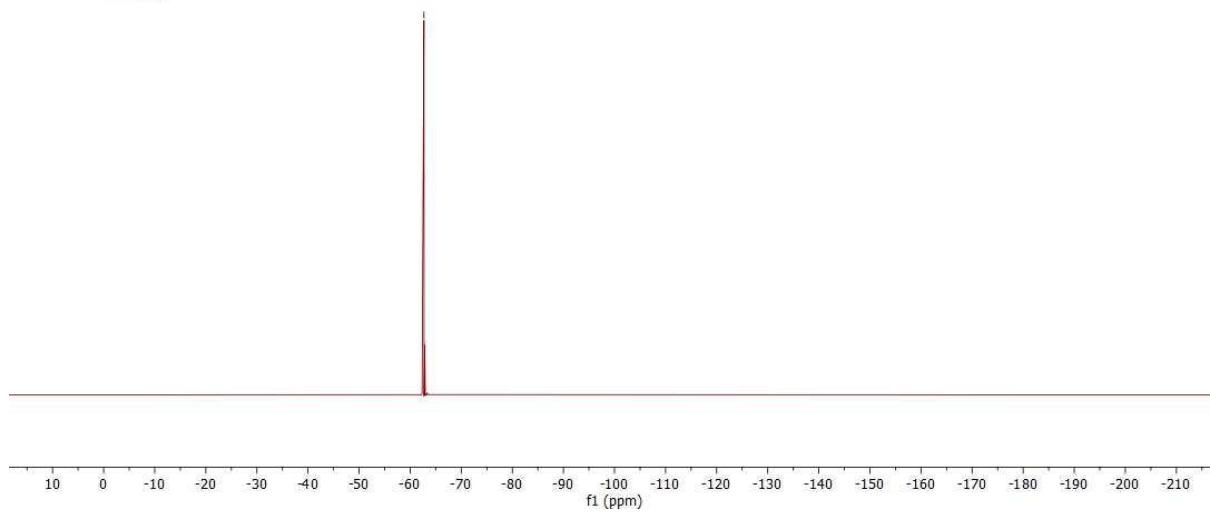

211019.331.10.fid — Fupeng Wu Ub-12 — Au1H CDCl3 {C:\Bruker\TopSpin3.6.2} 2110 31 — 300.13MHz

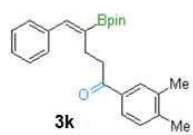

(<sup>1</sup>H NMR, CDCl<sub>3</sub>, 300 MHz)

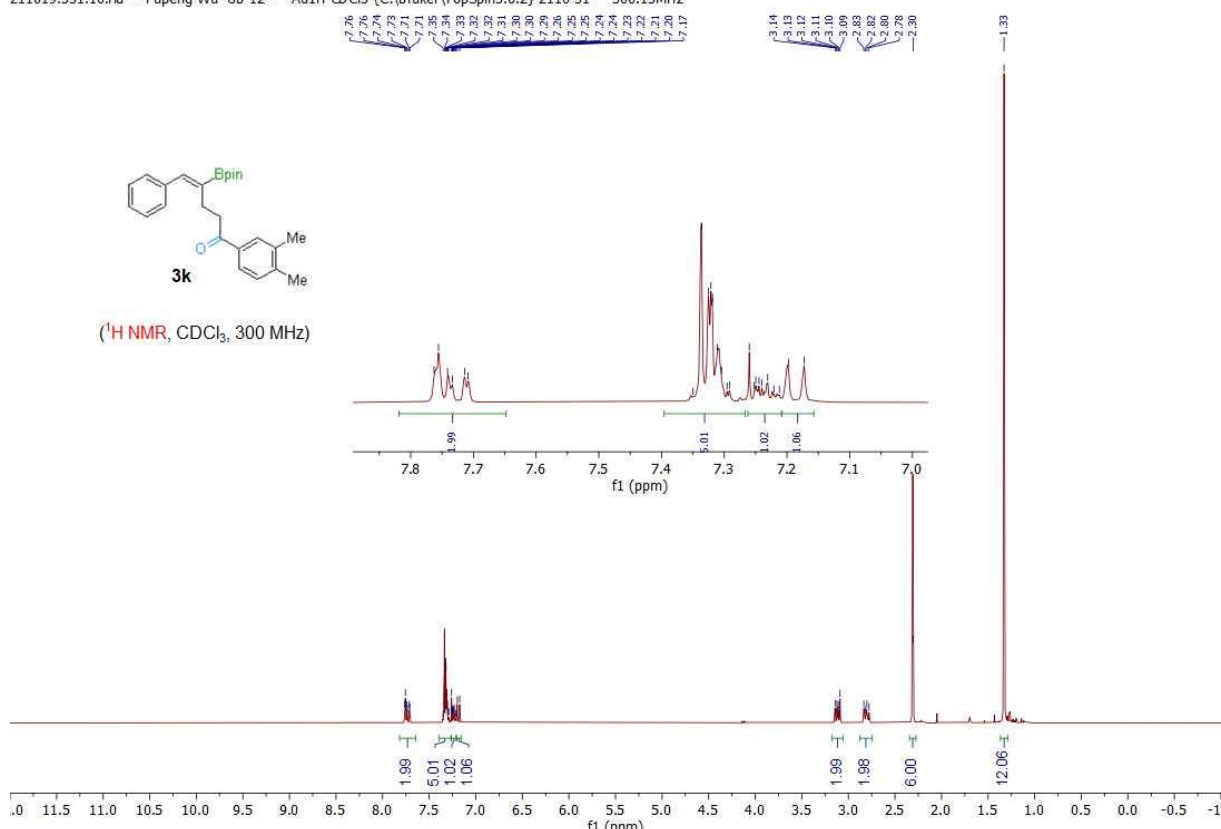

211019.331.11.fid — Fupeng Wu Ub-12 — Au13C CDCl3 {C:\Bruker\TopSpin3.6.2} 2110 31 — 75.48MHz

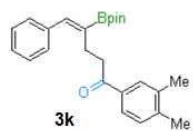

(<sup>13</sup>C NMR, CDCl<sub>3</sub>, 75 MHz)

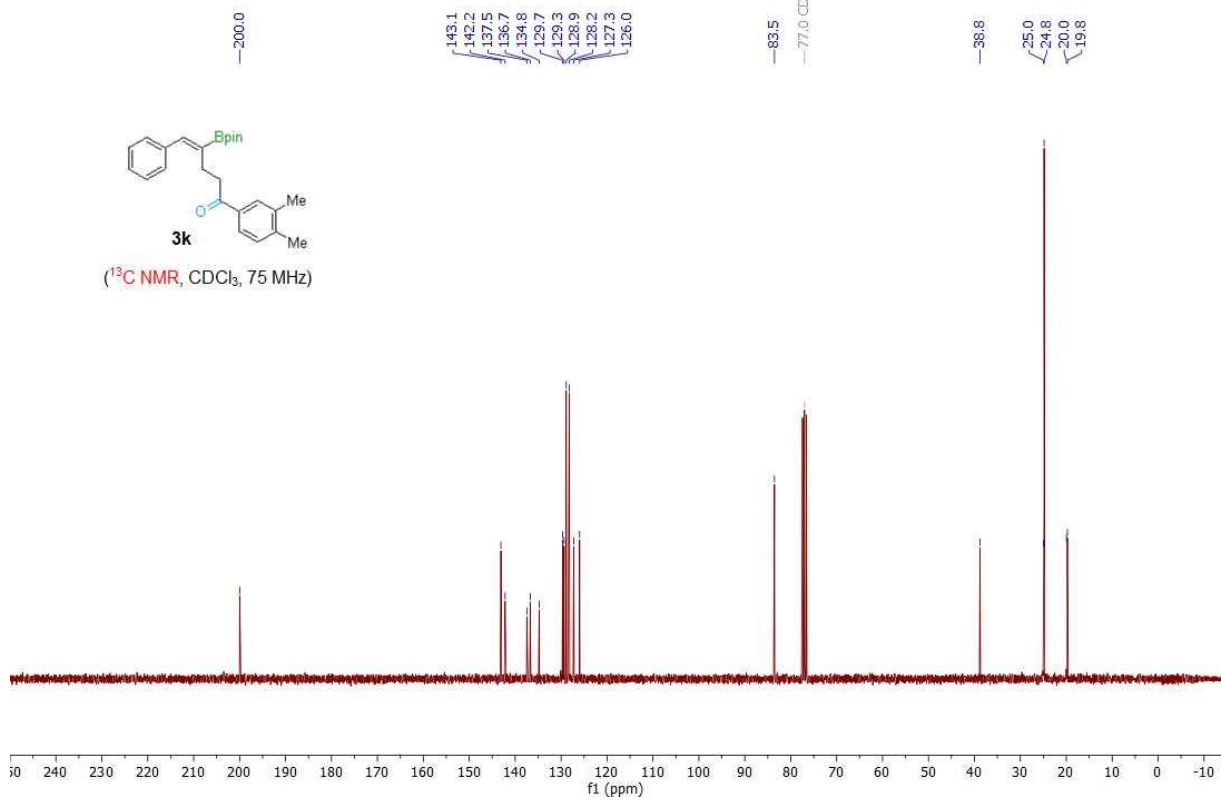



—30.1



(<sup>11</sup>B NMR, CDCl<sub>3</sub>, 96 MHz)

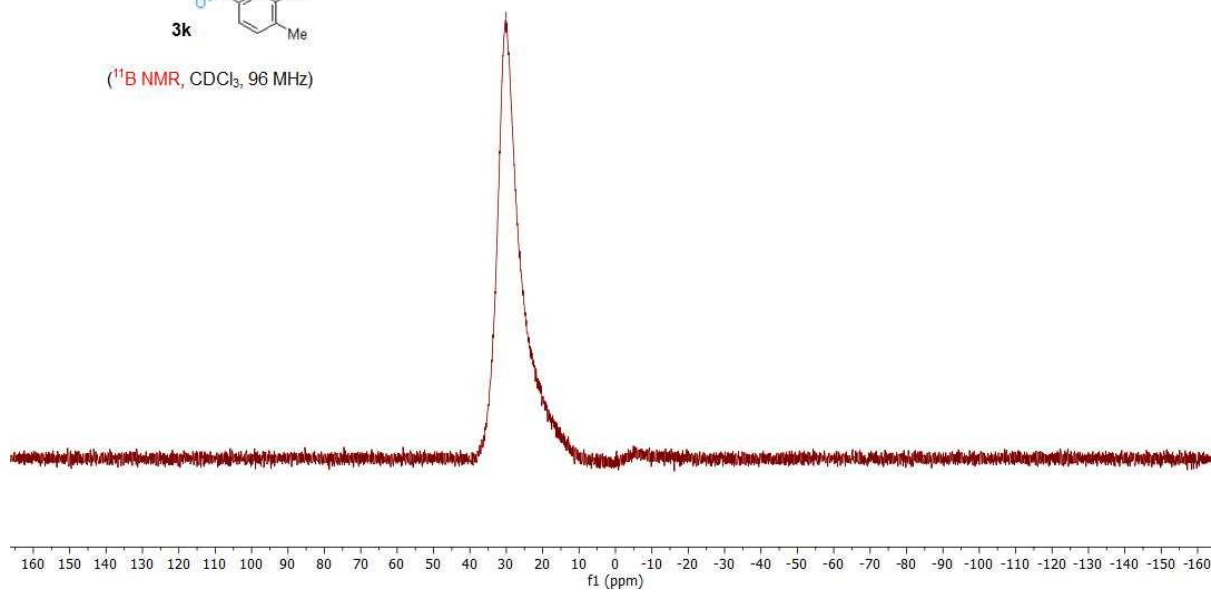

211020.f329.10.fid — Fupeng Wu Ub-18 — PROTON CDCl3 {C:\Bruker\TopSpin3.6.2} 2110 29 — 300.20MHz

8.08  
7.80  
7.80  
7.78  
7.77  
7.51  
7.49  
7.36  
7.35  
7.33  
7.33  
7.32  
7.31  
7.31  
7.30  
7.26  
7.26  
7.25  
7.25  
7.24  
7.24  
7.22  
7.21

3.10  
3.09  
3.08  
3.08  
3.07  
3.06  
3.05  
2.81  
2.80  
2.79  
2.78  
2.76

1.33

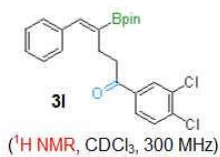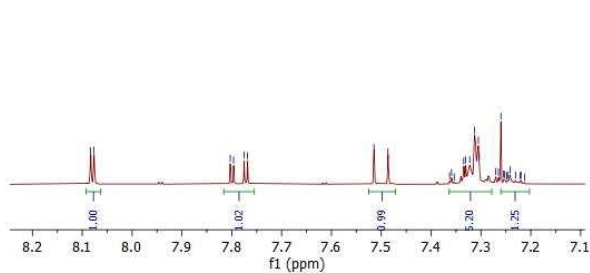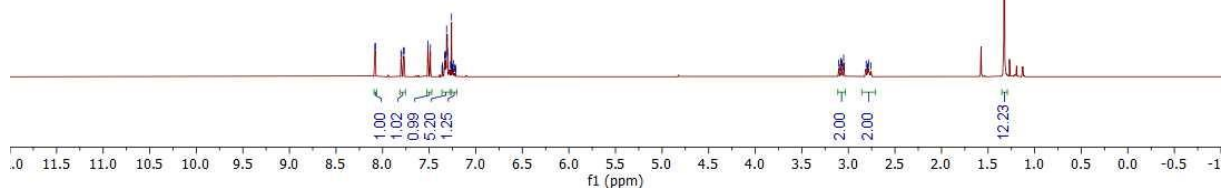

211020.f329.11.fid — Fupeng Wu Ub-18 — C13CPD CDCl3 {C:\Bruker\TopSpin3.6.2} 2110 29 — 75.49MHz

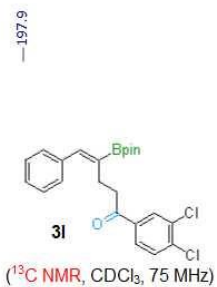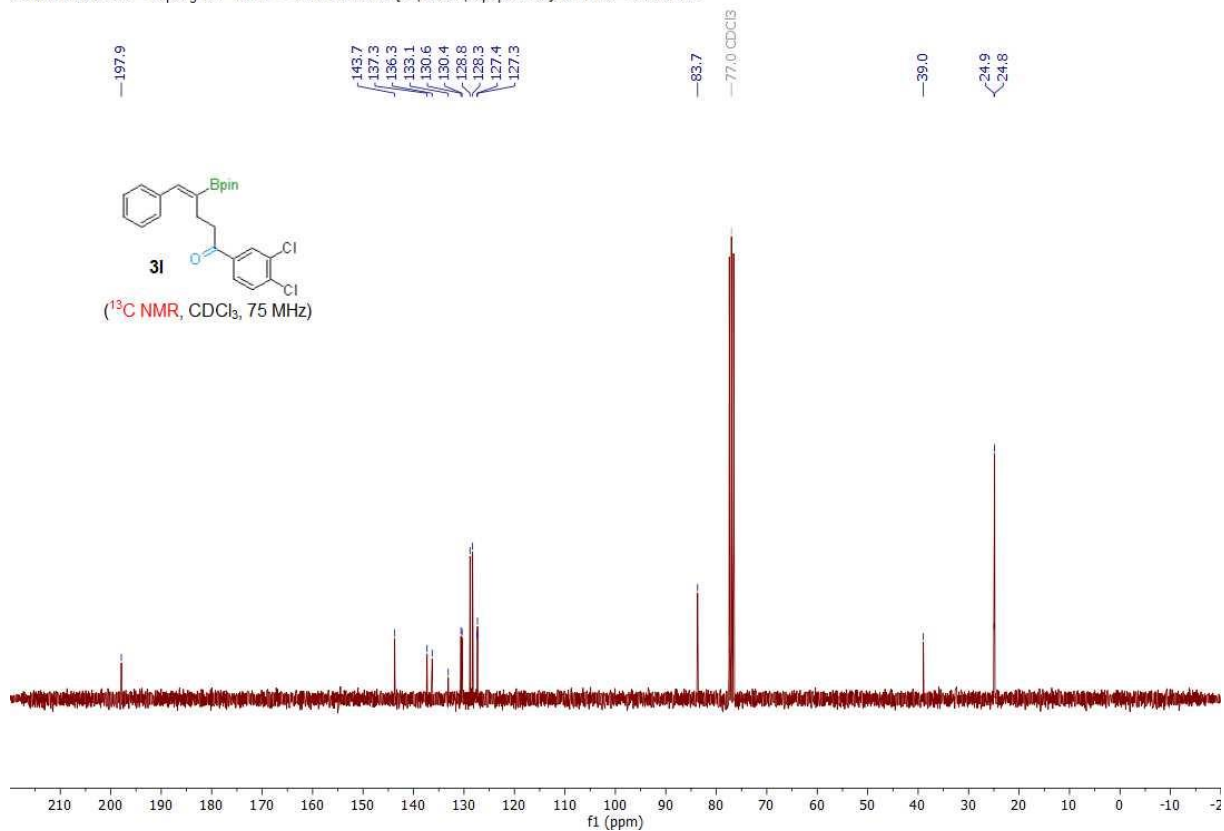

—30.5

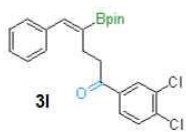

(<sup>11</sup>B NMR, CDCl<sub>3</sub>, 96 MHz)

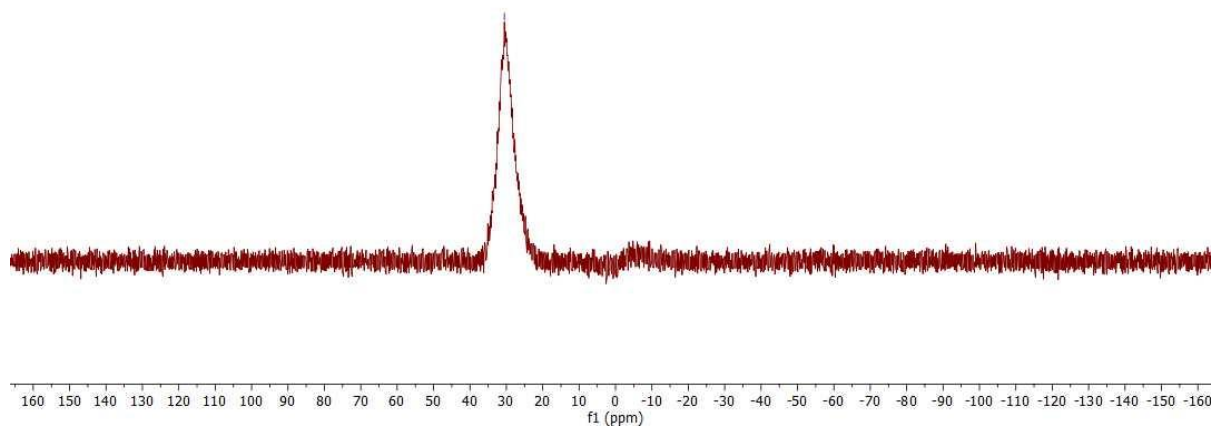

211021.f344.10.fid — Fupeng Wu Ub-19 — PROTON CDCl3 {C:\Bruker\TopSpin3.6.2} 2110 44 — 300.20MHz

8.83  
8.83  
8.63  
8.62  
8.61  
8.60  
8.60  
8.59  
7.99  
7.95  
7.91  
7.90  
7.88  
7.88  
7.86  
7.85  
7.85  
7.80  
7.58  
7.58  
7.55  
7.54  
7.52  
7.52  
7.50  
7.50  
7.47  
7.46  
7.46  
7.34  
7.34  
7.33  
7.33  
7.30  
7.30  
7.29  
7.29  
7.26  
7.26  
7.25  
7.25  
7.24  
7.24  
7.22  
7.22  
7.20  
7.20  
3.29  
3.27  
3.26  
3.25  
3.25  
3.23  
3.23  
2.94  
2.93  
2.91  
2.91  
2.90  
2.88  
1.34

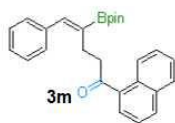

3m  
(<sup>1</sup>H NMR, CDCl<sub>3</sub>, 300 MHz)

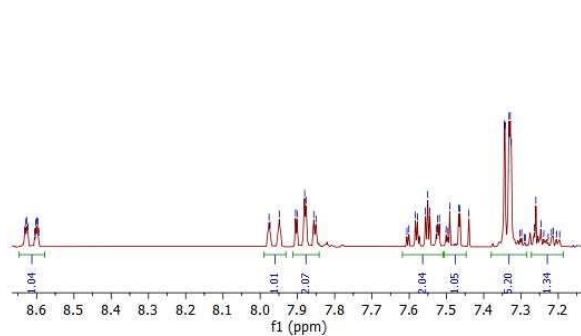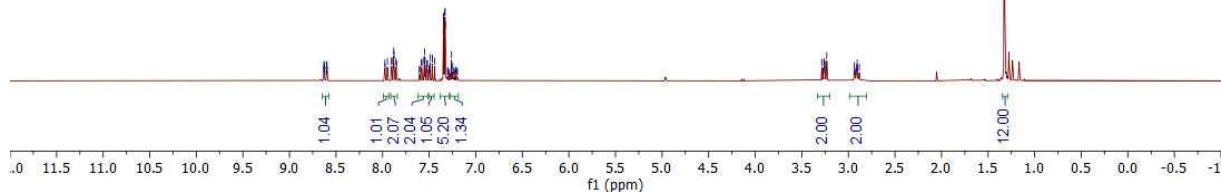

211021.f344.11.fid — Fupeng Wu Ub-19 — C13CPD CDCl3 {C:\Bruker\TopSpin3.6.2} 2110 44 — 75.49MHz

—204.3

143.2  
137.4  
135.9  
133.9  
132.3  
130.2  
128.9  
128.3  
128.2  
127.7  
127.6  
127.3  
126.3  
125.9  
124.3

—83.5

—77.0 CDCl3

—42.2

—25.0  
—24.8

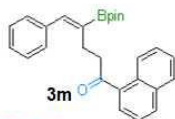

3m  
(<sup>13</sup>C NMR, CDCl<sub>3</sub>, 75 MHz)

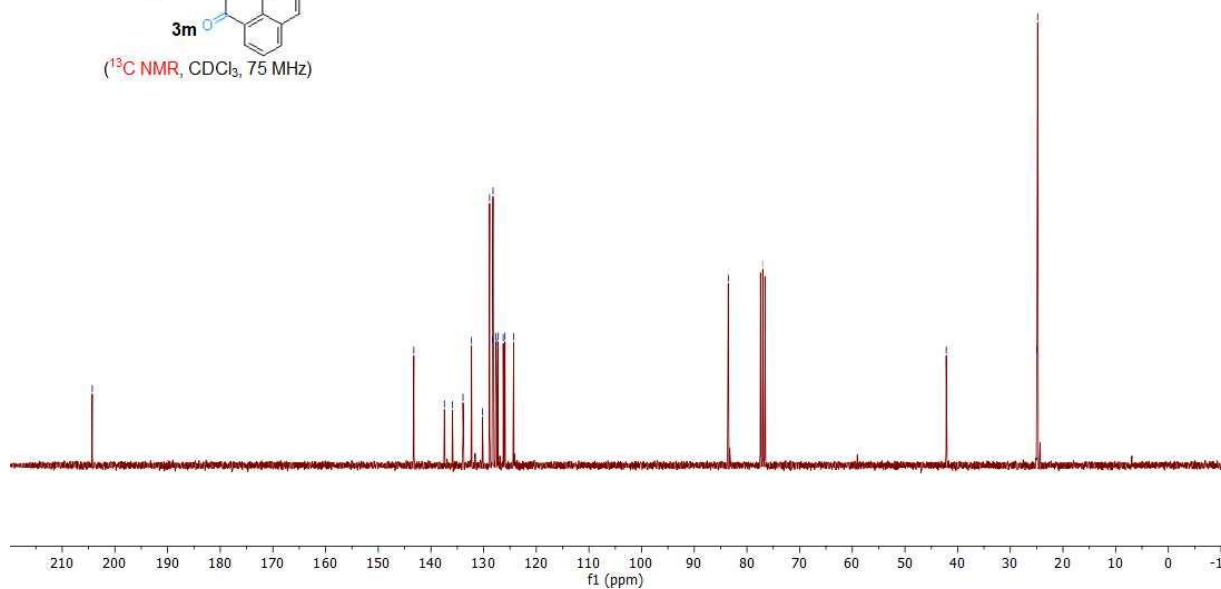

30.0

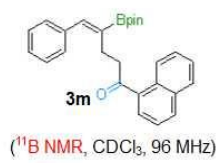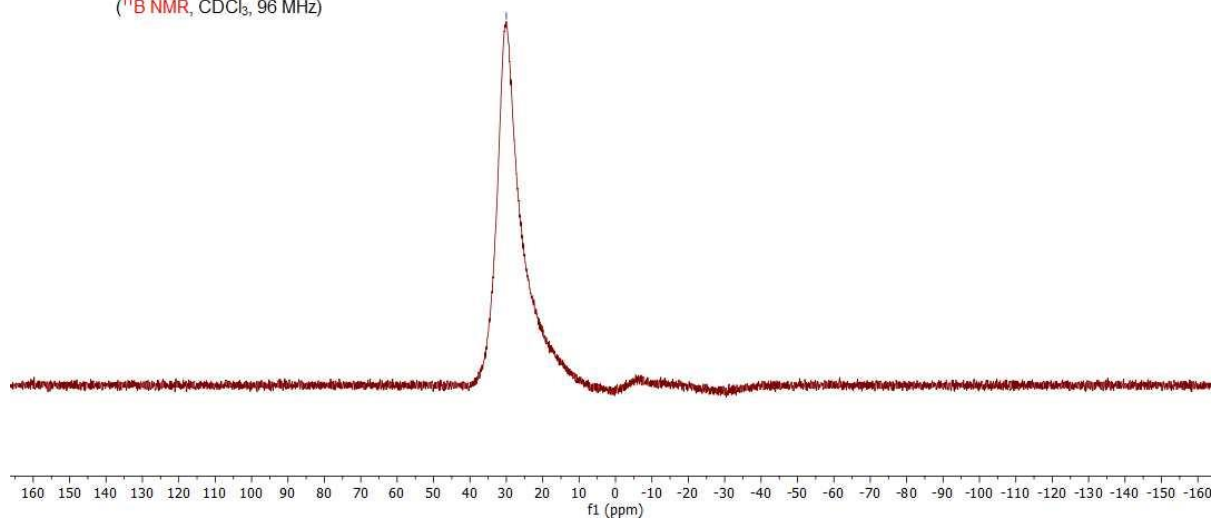

211022.336.10.fid — Fupeng Wu Ub-25 — Au1H CDCl3 {C:\Bruker\TopSpin3.6.2} 2110 36 — 300.13MHz

7.93, 7.91, 7.89, 7.87, 7.84, 7.83, 7.80, 7.78, 7.76, 7.75, 7.74, 7.71, 7.21, 6.83, 6.82, 6.81, 6.79, 6.78, 4.36, 4.31, 4.19, 3.00, 3.02, 3.06, 3.05, 3.04, 2.81, 2.79, 2.78, 2.75, 1.65, 1.31, 1.24, 1.21, 1.19

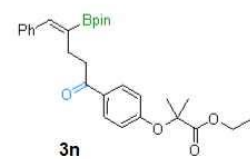

(<sup>1</sup>H NMR, CDCl<sub>3</sub>, 300 MHz)

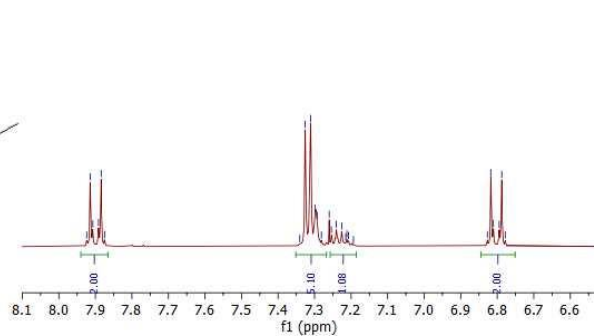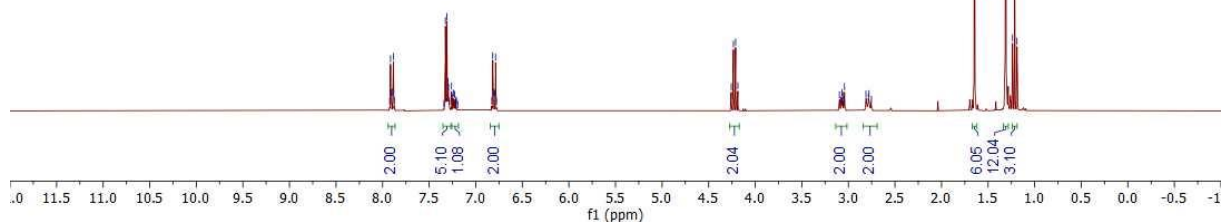

211022.336.11.fid — Fupeng Wu Ub-25 — Au13C CDCl3 {C:\Bruker\TopSpin3.6.2} 2110 36 — 75.48MHz

198.6, 173.7, 159.5, 143.2, 137.4, 130.5, 130.0, 128.9, 128.2, 127.3, 117.3, 83.5, 79.2, 77.0 CDCl3, 61.6, 38.6, 25.3, 24.9, 24.8, 14.0

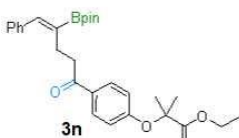

(<sup>13</sup>C NMR, CDCl<sub>3</sub>, 75 MHz)

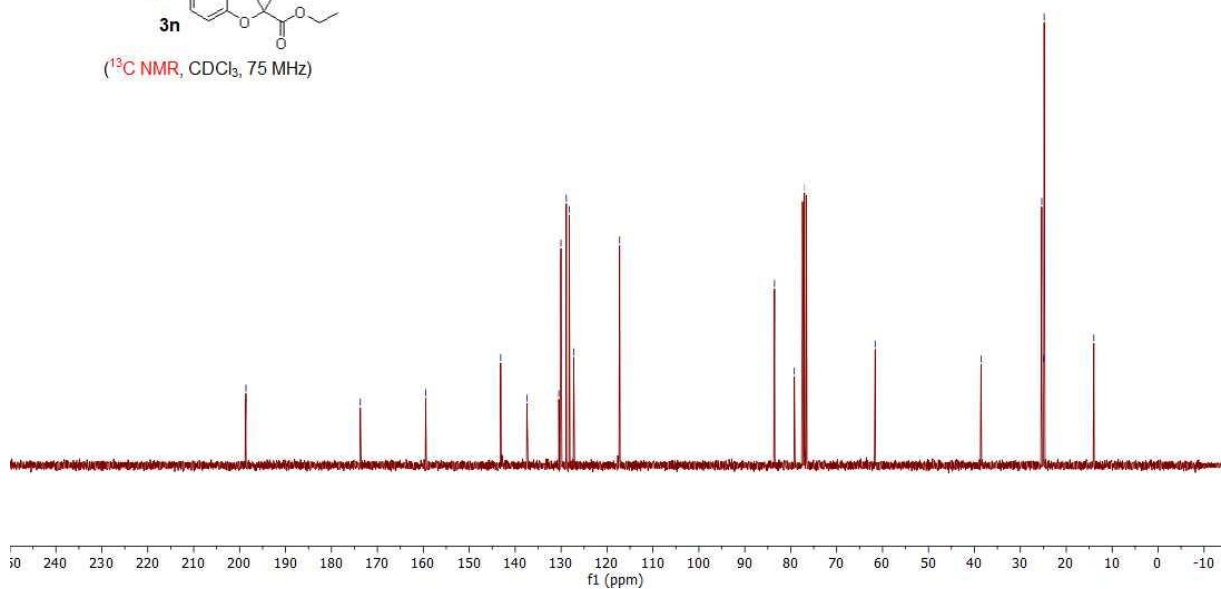

— 29.8

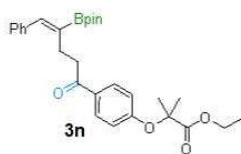

(<sup>11</sup>B NMR, CDCl<sub>3</sub>, 96 MHz)

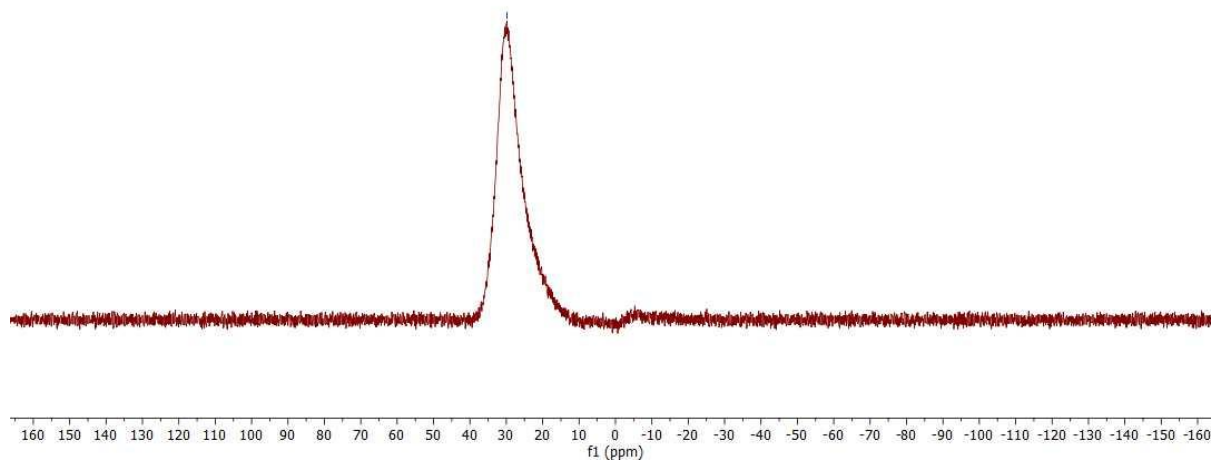

211105.443.10.fid — Fupeng Wu Ub-44 — Au1H CDCl3 {C:\Bruker\TopSpin3.5pl6} 2111 43 — 400.13MHz

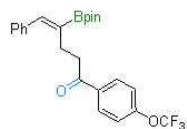

**3o**

(<sup>1</sup>H NMR, CDCl<sub>3</sub>, 300 MHz)

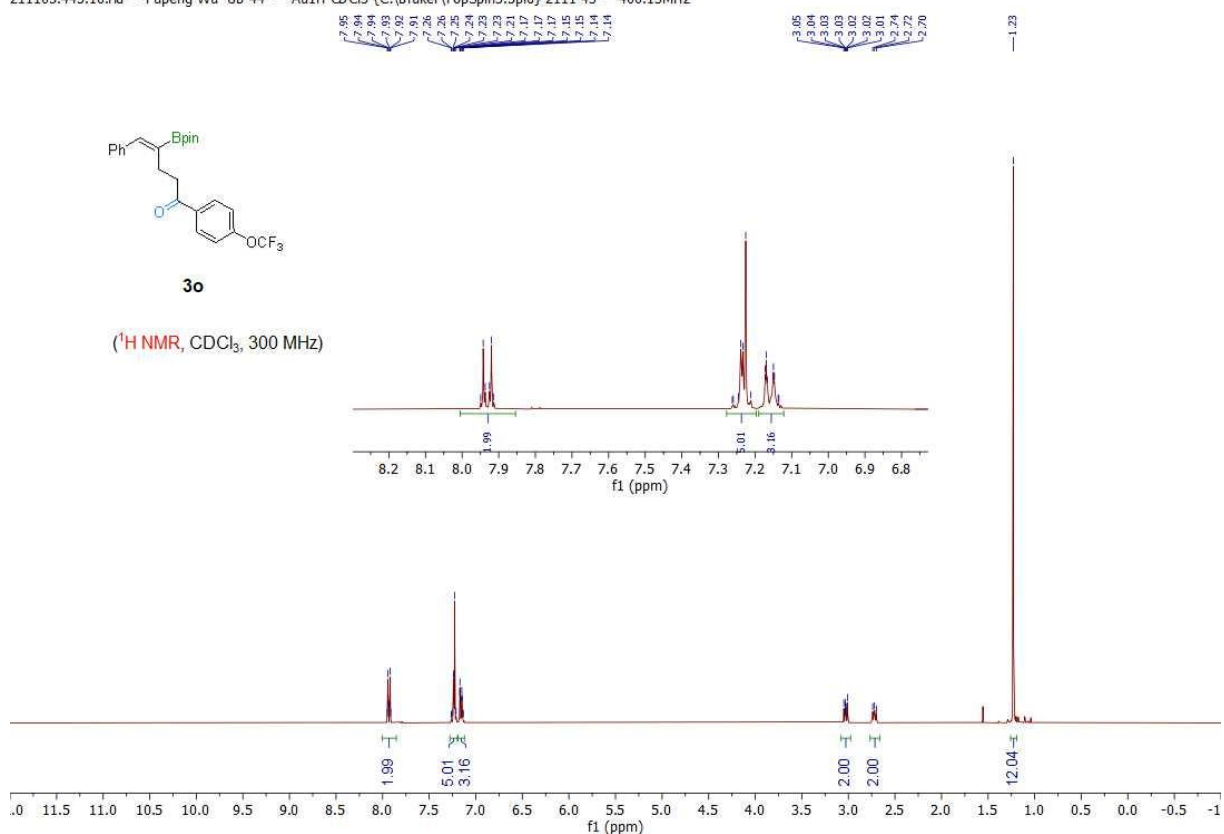

211105.443.11.fid — Fupeng Wu Ub-44 — Au13C CDCl3 {C:\Bruker\TopSpin3.5pl6} 2111 43 — 100.63MHz

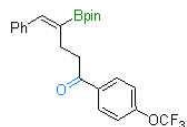

**3o**

(<sup>13</sup>C NMR, CDCl<sub>3</sub>, 75 MHz)

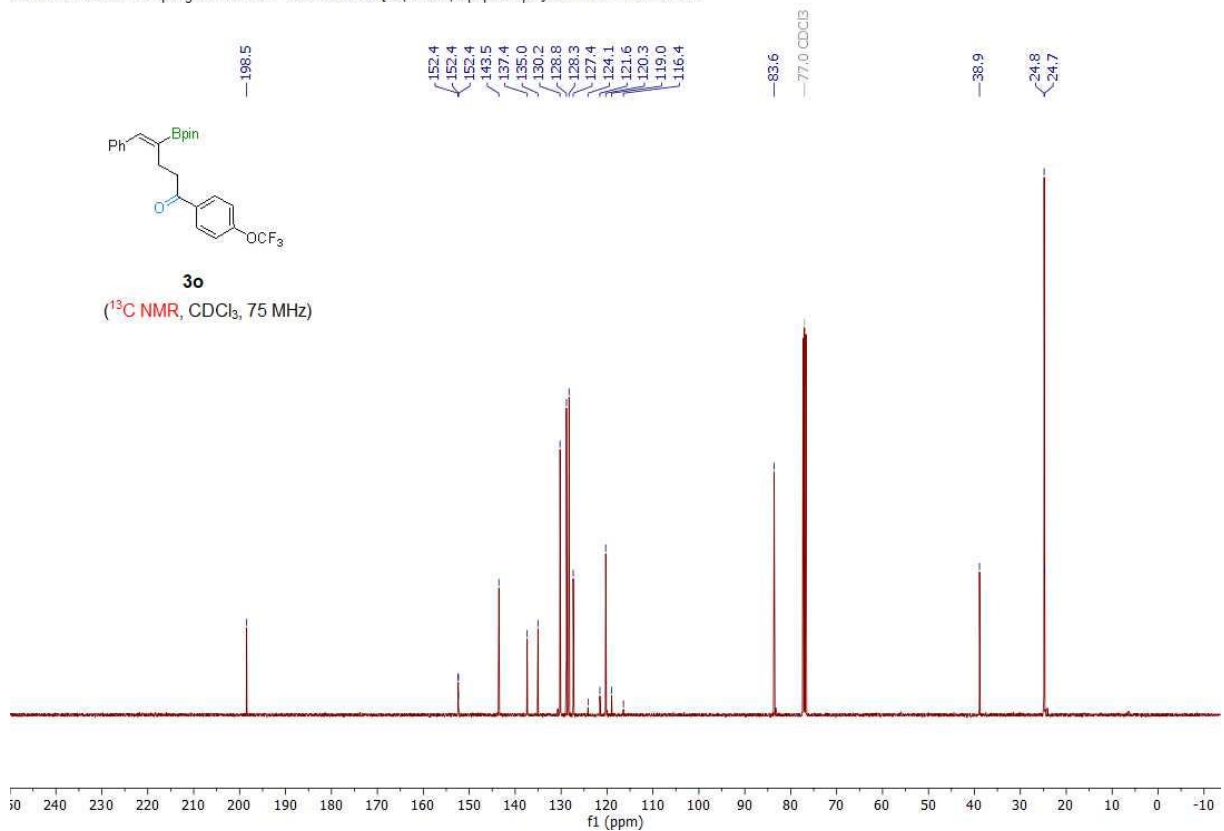



30.6

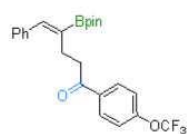

**3o**

(<sup>11</sup>B NMR, CDCl<sub>3</sub>, 96 MHz)

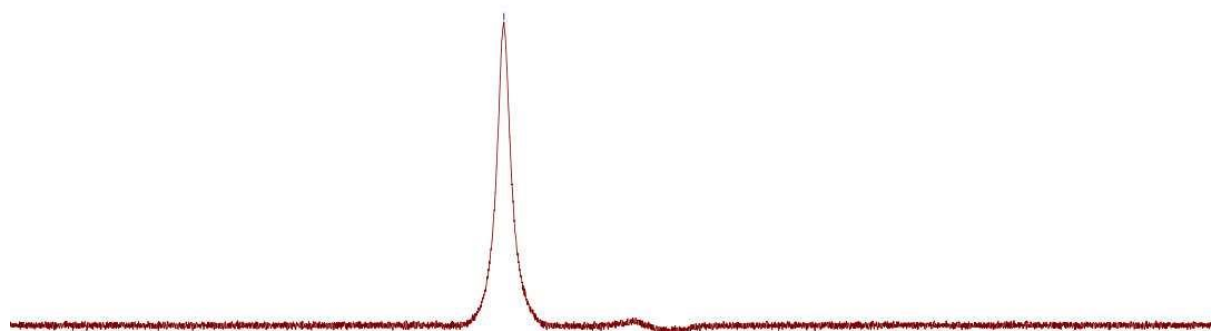

160 150 140 130 120 110 100 90 80 70 60 50 40 30 20 10 0 -10 -20 -30 -40 -50 -60 -70 -80 -90 -100 -110 -120 -130 -140 -150 -160  
f1 (ppm)

211105.443.13.fid — Fupeng Wu Ub-44 — F19 CDCl<sub>3</sub> {C:\Bruker\TopSpin3.5pl6} 2111 43 — 376.46MHz

57.6

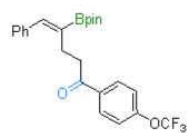

**3o**

(<sup>19</sup>F NMR, CDCl<sub>3</sub>, 96 MHz)

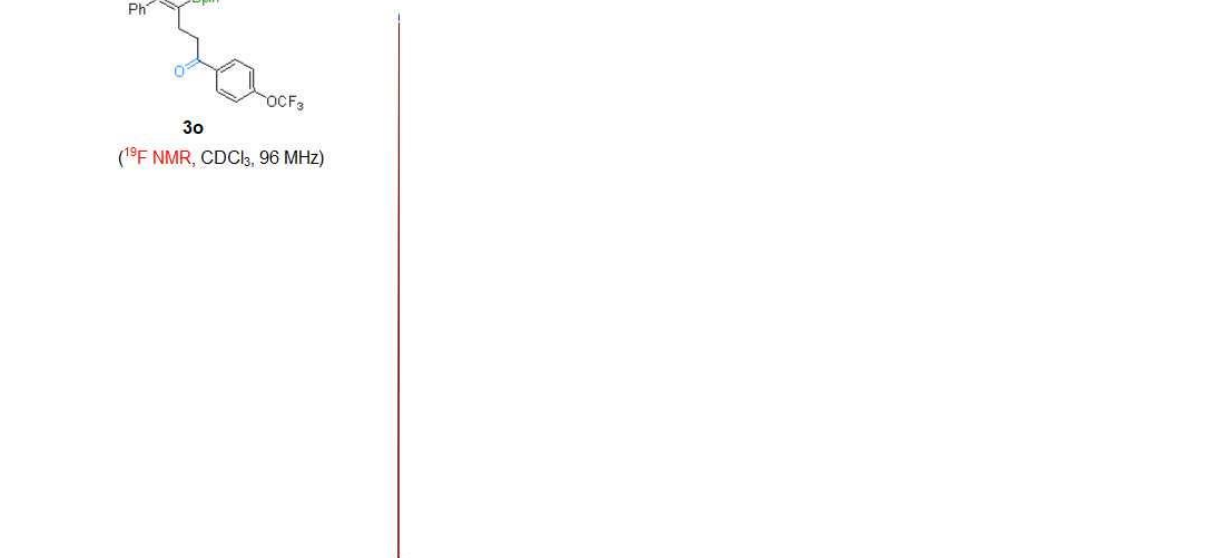

10 0 -10 -20 -30 -40 -50 -60 -70 -80 -90 -100 -110 -120 -130 -140 -150 -160 -170 -180 -190 -200 -210  
f1 (ppm)

211020.f327.10.fid — Fupeng Wu Ub-17 — PROTON CDCl3 {C:\Bruker\TopSpin3.6.2} 2110 27 — 300.20MHz

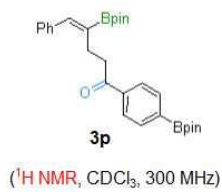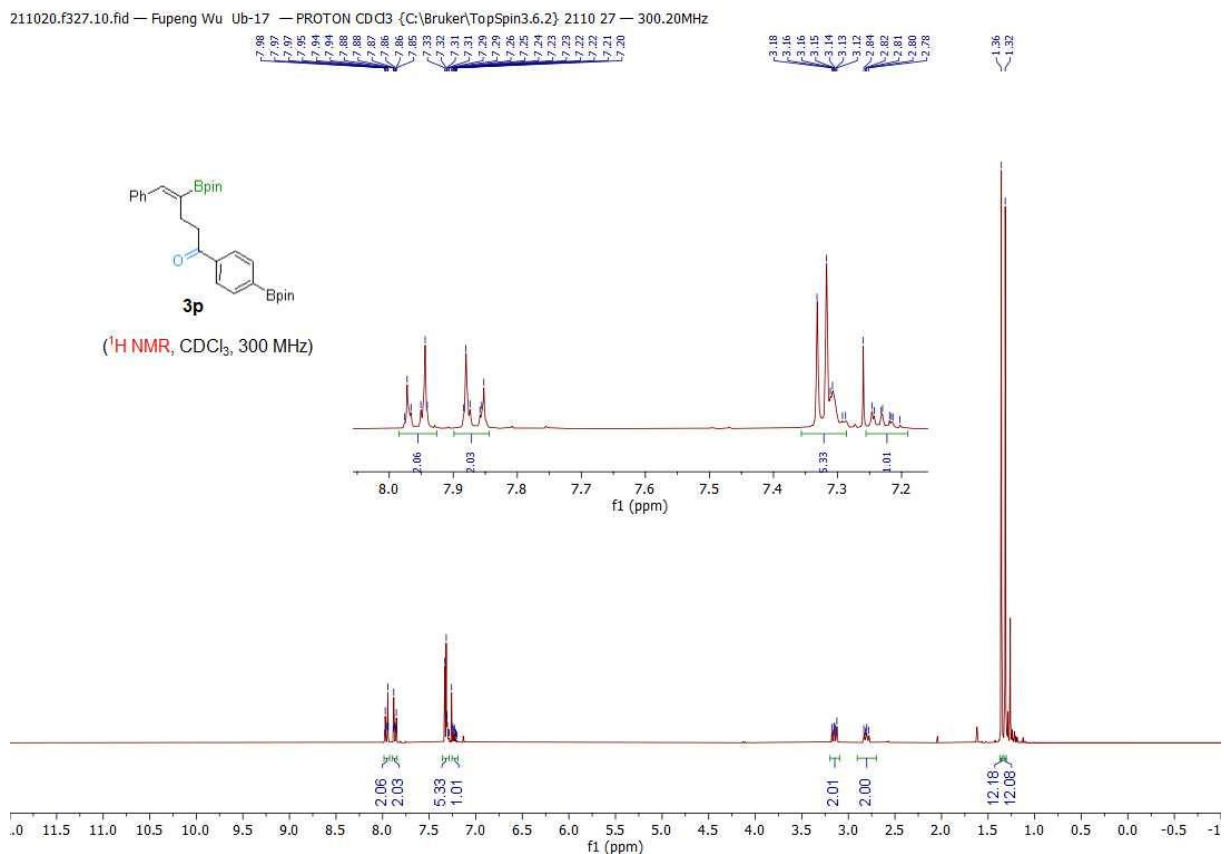

211020.f327.11.fid — Fupeng Wu Ub-17 — C13CPD CDCl3 {C:\Bruker\TopSpin3.6.2} 2110 27 — 75.49MHz

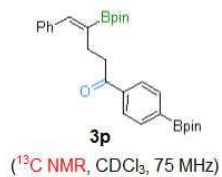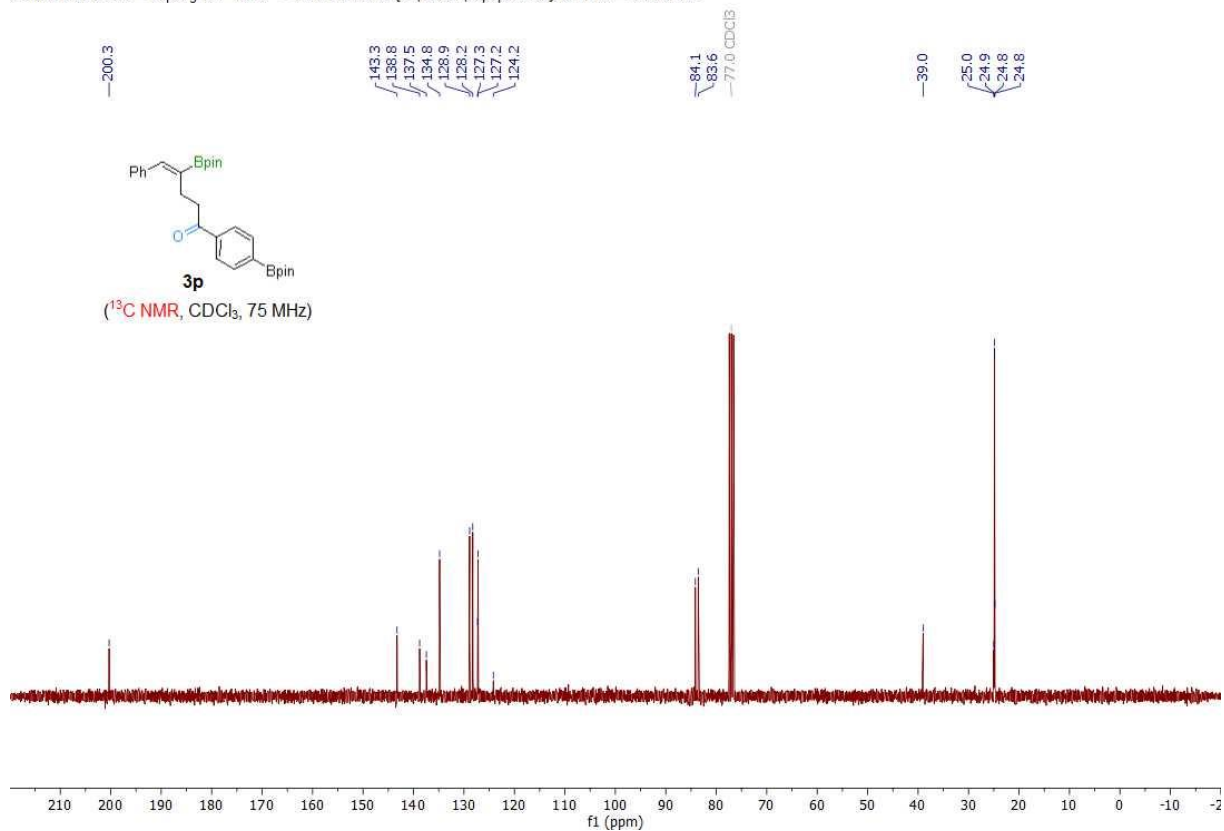

— 30.1

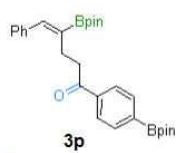

**3p**  
(<sup>11</sup>B NMR, CDCl<sub>3</sub>, 96 MHz)

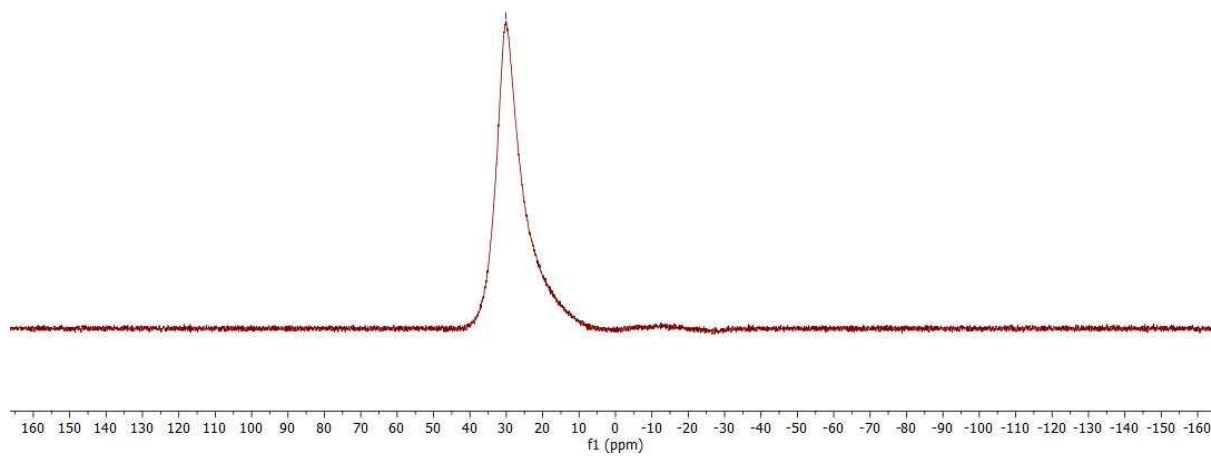

211021.f345.10.fid — Fupeng Wu Ub-15-1 — PROTON CDCl3 {C:\Bruker\TopSpin3.6.2} 2110 45 — 300.20MHz

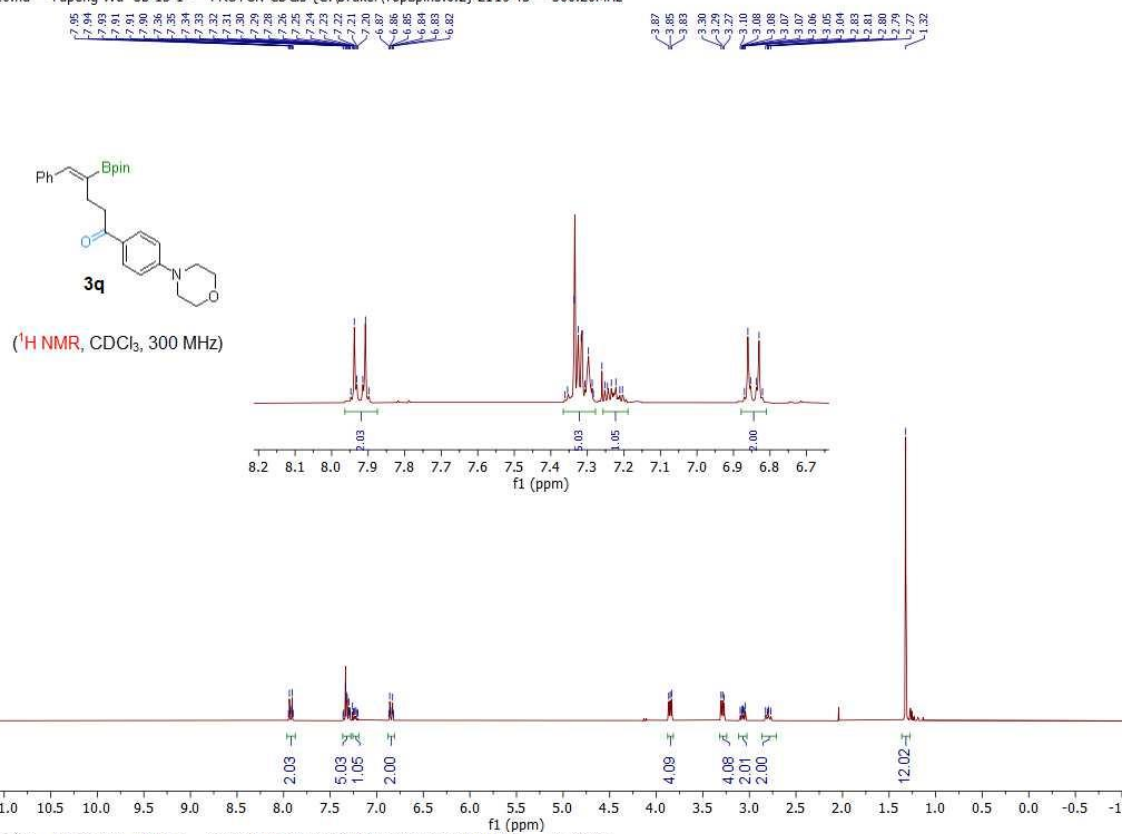

211021.f345.11.fid — Fupeng Wu Ub-15-1 — C13CPD CDCl3 {C:\Bruker\TopSpin3.6.2} 2110 45 — 75.49MHz

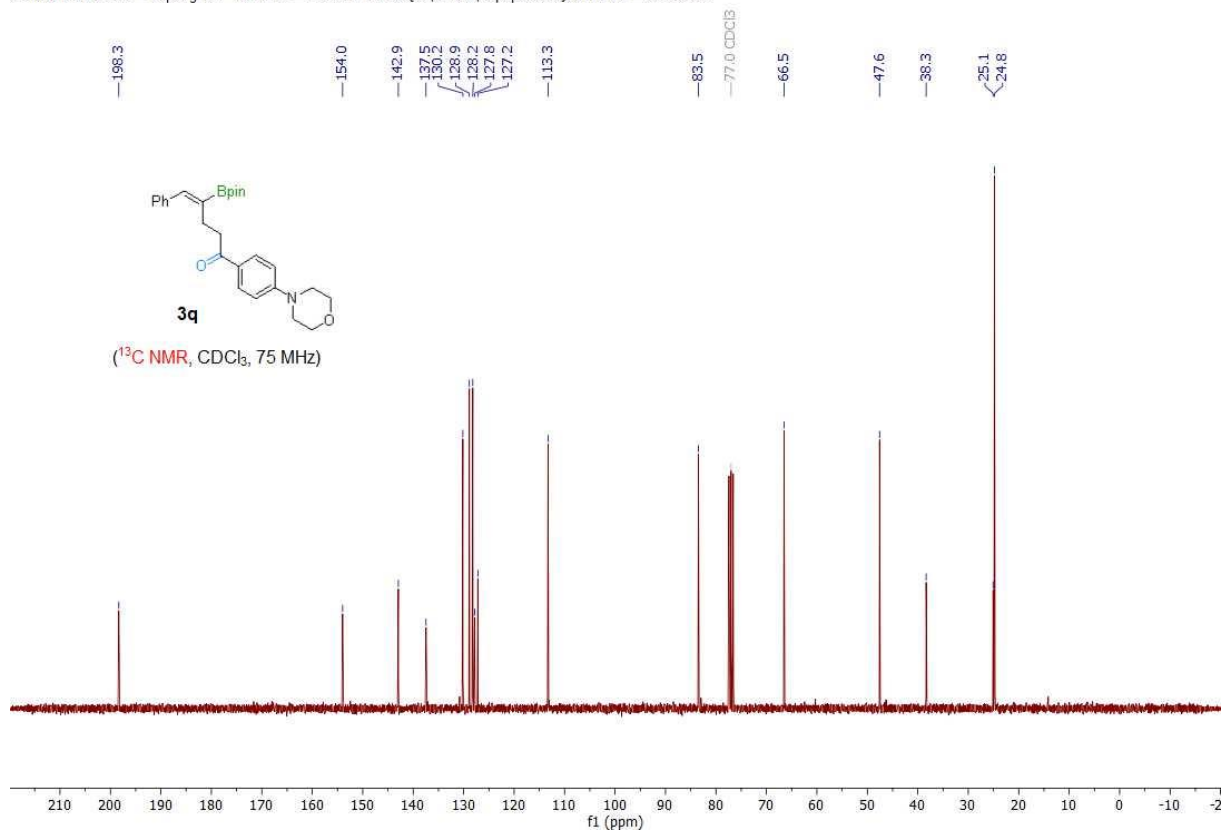

— 30.0

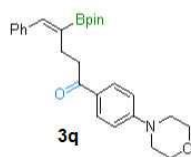

(<sup>11</sup>B NMR, CDCl<sub>3</sub>, 96 MHz)

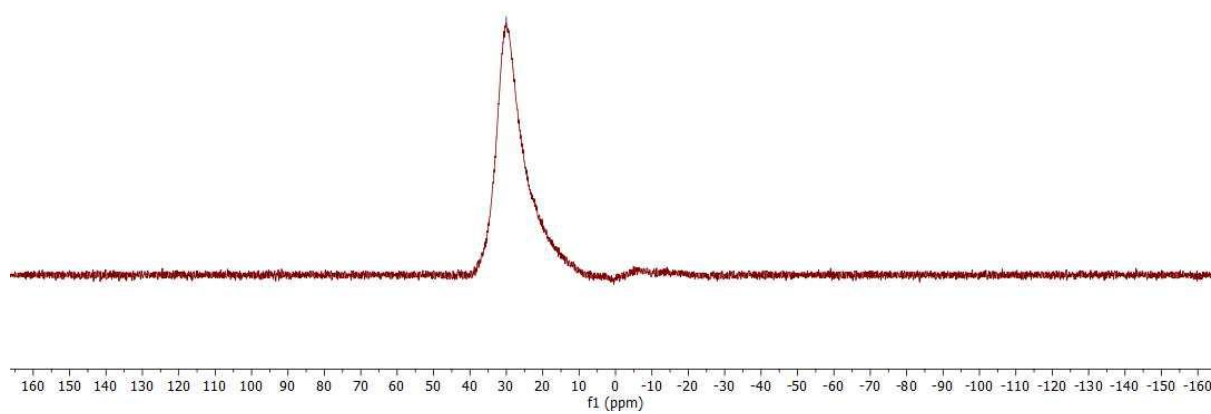

211026.330.10.fid — Fupeng Wu, Ub-23 — Au1H CDCl3 {C:\Bruker\TopSpin3.6.2} 2110 30 — 300.13MHz

8.07, 8.06, 8.06, 8.04, 8.04, 8.04, 8.03, 7.96, 7.94, 7.92, 7.91, 7.84, 7.83, 7.81, 7.31, 7.30, 7.26, 7.26, 7.24, 7.22, 7.21, 7.17, 7.12, 7.12, 6.90, 6.39, 3.17, 3.16, 3.15, 3.14, 3.13, 3.13, 3.12, 2.84, 2.84, 2.83, 2.81, -1.33

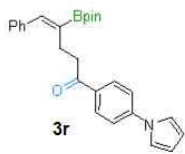

(<sup>1</sup>H NMR, CDCl<sub>3</sub>, 300 MHz)

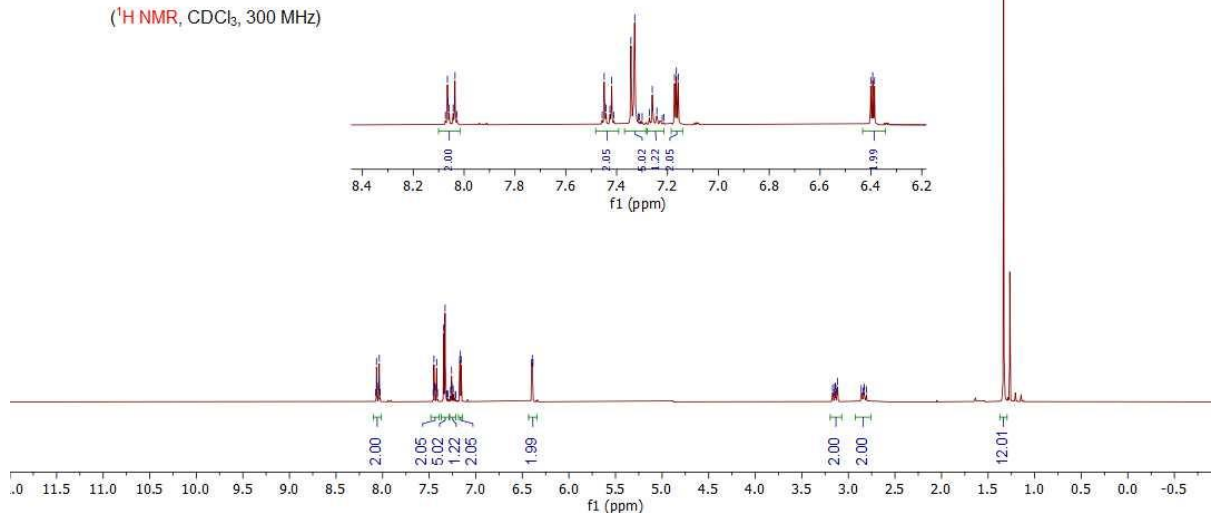

211026.330.11.fid — Fupeng Wu, Ub-23 — Au13C CDCl3 {C:\Bruker\TopSpin3.6.2} 2110 30 — 75.48MHz

198.7, 143.8, 143.4, 137.4, 133.7, 130.1, 128.9, 128.3, 127.3, 119.3, 119.0, 111.5, 83.6, -77.0 CDCl3, 38.8, 25.0, 24.8

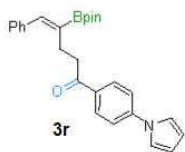

(<sup>13</sup>C NMR, CDCl<sub>3</sub>, 75 MHz)

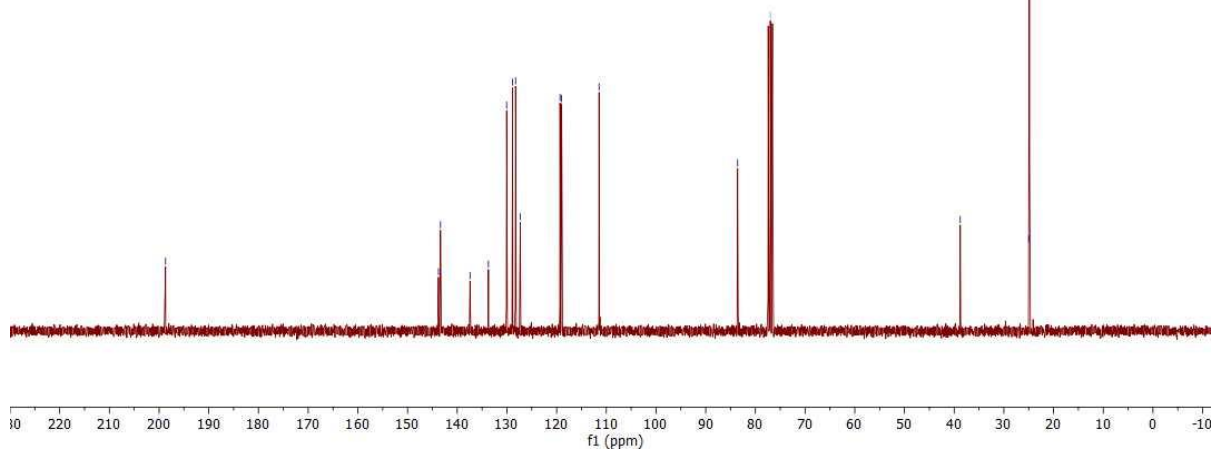

—30.1

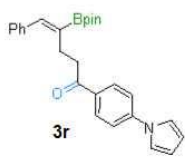

(<sup>11</sup>B NMR, CDCl<sub>3</sub>, 96 MHz)

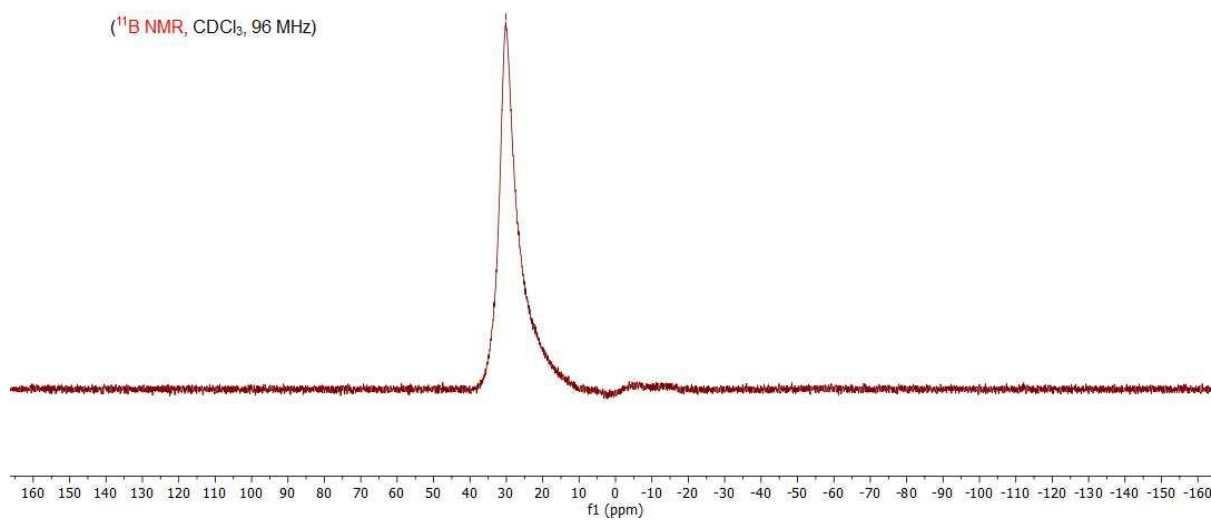

211019.330.10.fid — Fupeng Wu Ub-10 — Au1H CDCl3 {C:\Bruker\TopSpin3.6.2} 2110 30 — 300.13MHz

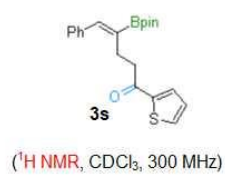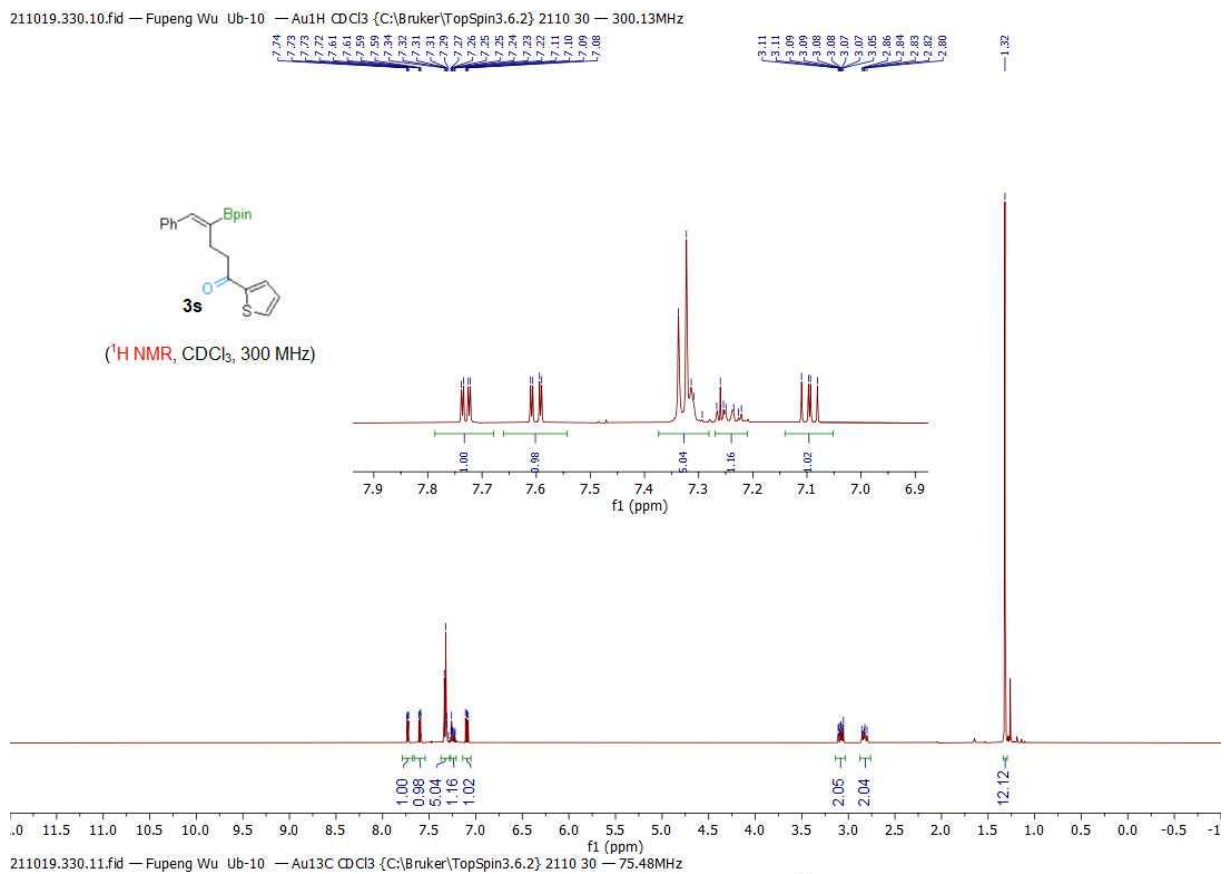

211019.330.11.fid — Fupeng Wu Ub-10 — Au13C CDCl3 {C:\Bruker\TopSpin3.6.2} 2110 30 — 75.48MHz

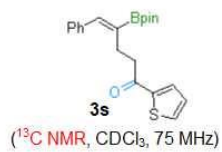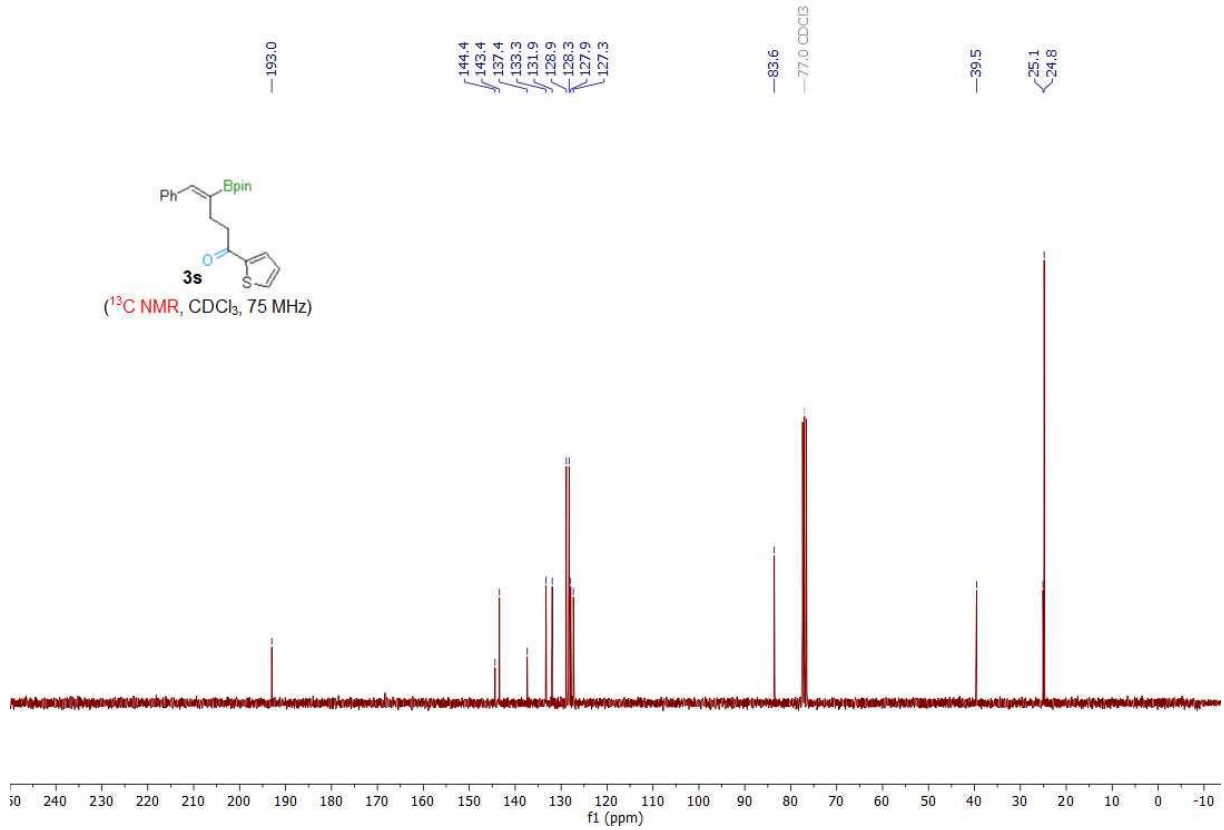



—30.4

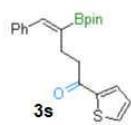

(<sup>11</sup>B NMR, CDCl<sub>3</sub>, 96 MHz)

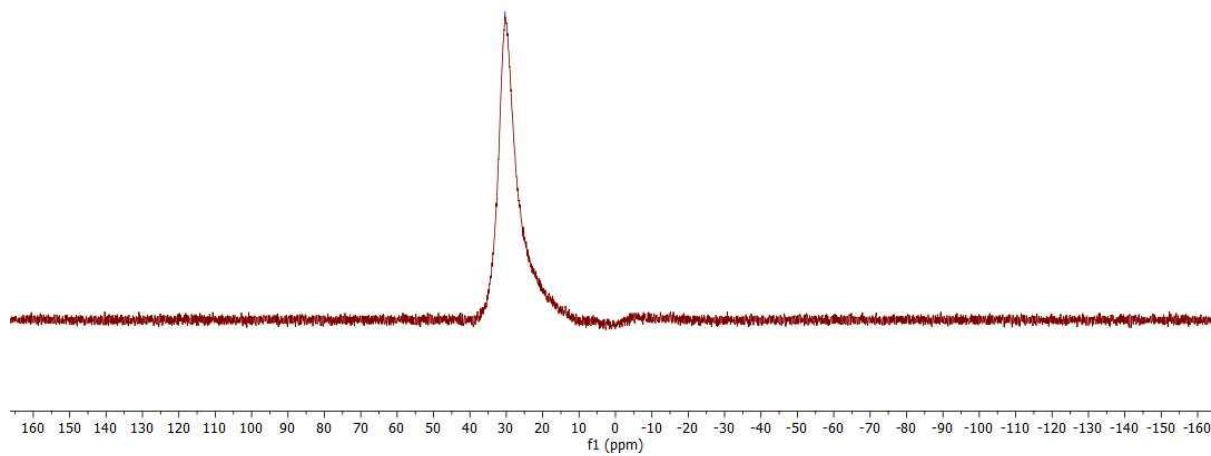

211022.335.10.fid — Fupeng Wu Ub-24 — Au1H CDCl3 {C:\Bruker\TopSpin3.6.2} 2110 35 — 300.13MHz

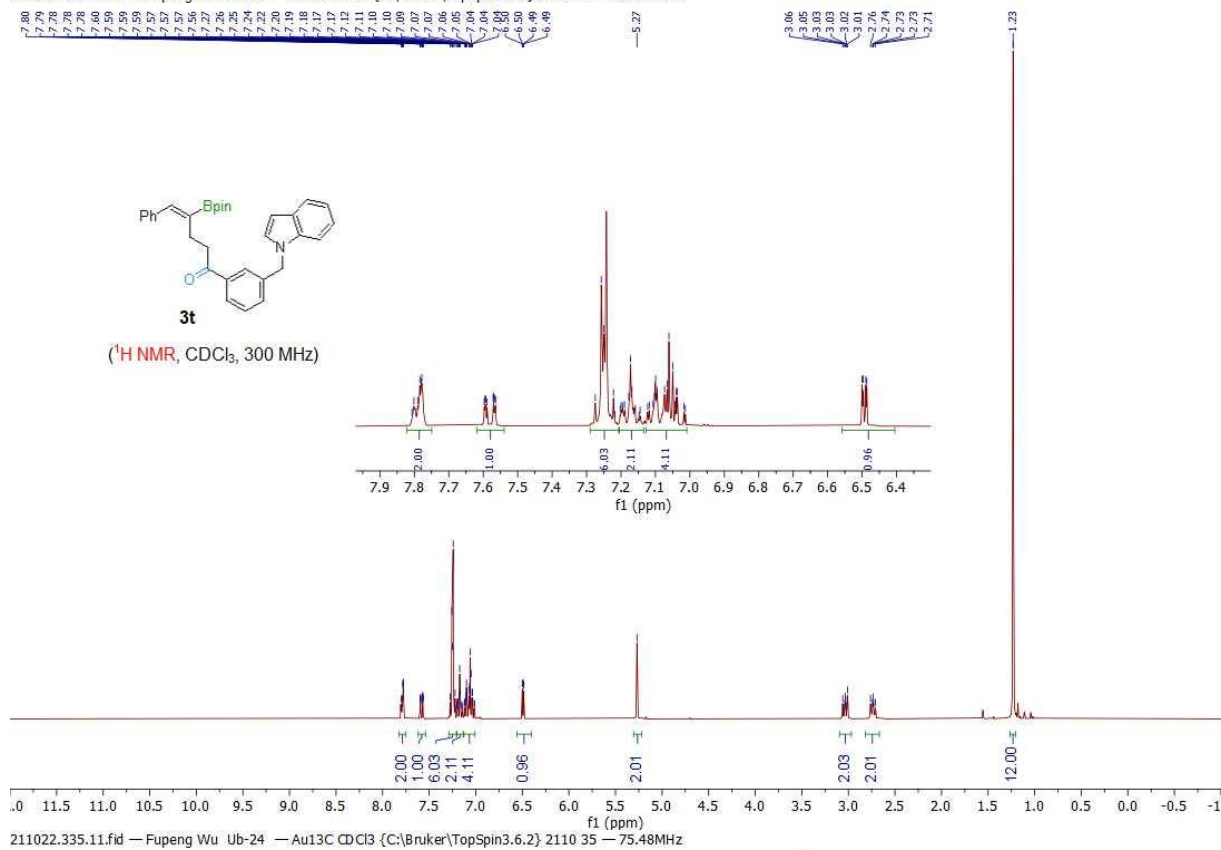

211022.335.11.fid — Fupeng Wu Ub-24 — Au13C CDCl3 {C:\Bruker\TopSpin3.6.2} 2110 35 — 75.48MHz

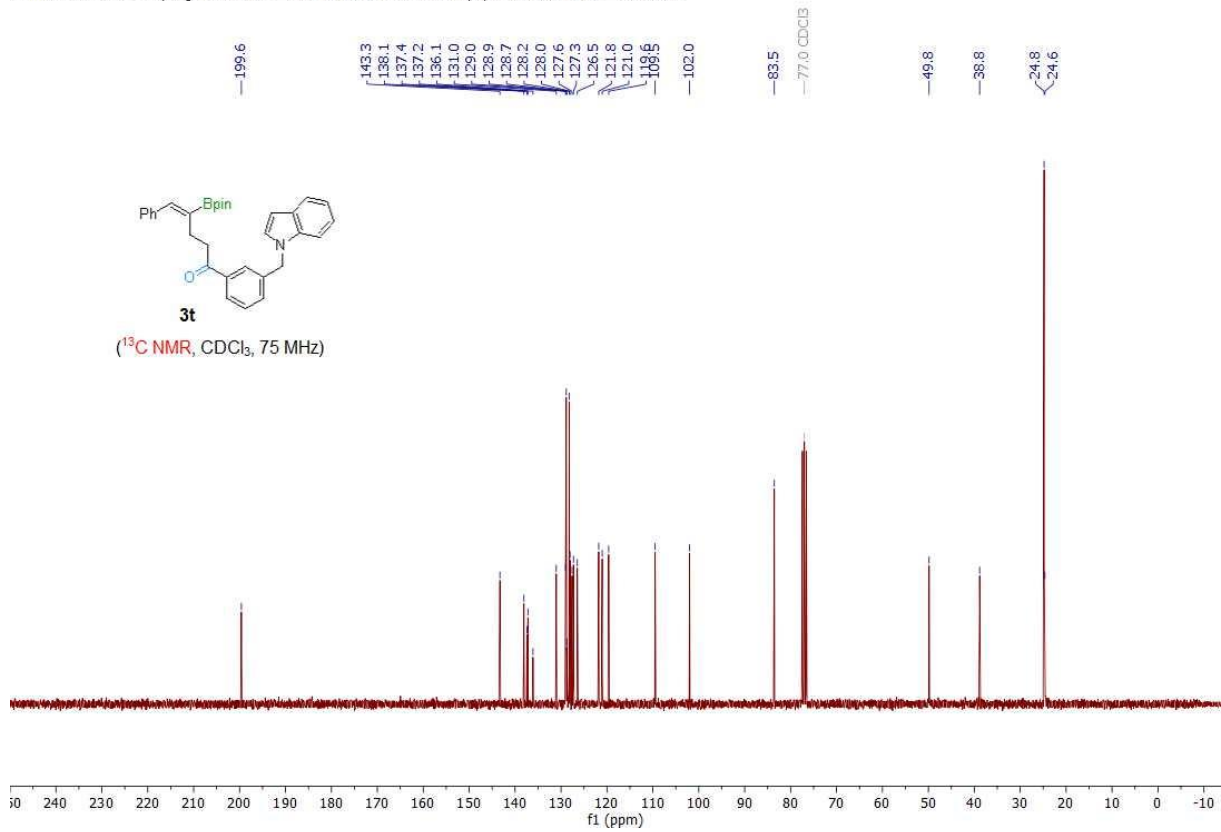

— 29.9

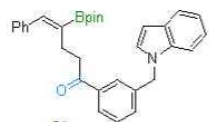

**3t**

(<sup>11</sup>B NMR, CDCl<sub>3</sub>, 96 MHz)

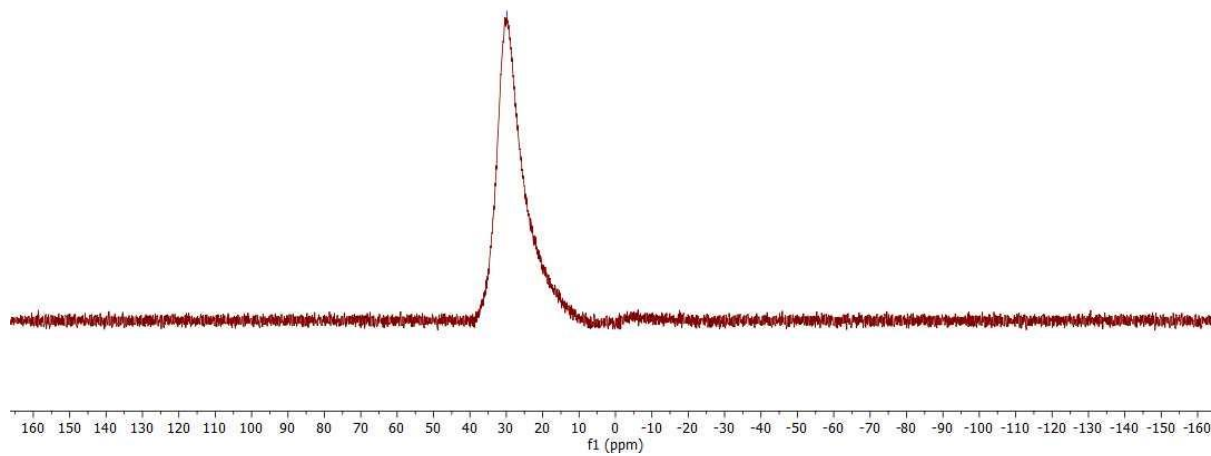

211022.338.10.fid — Fupeng Wu Ub-22 — Au1H CDCl3 {C:\Bruker\TopSpin3.6.2} 2110 38 — 300.13MHz

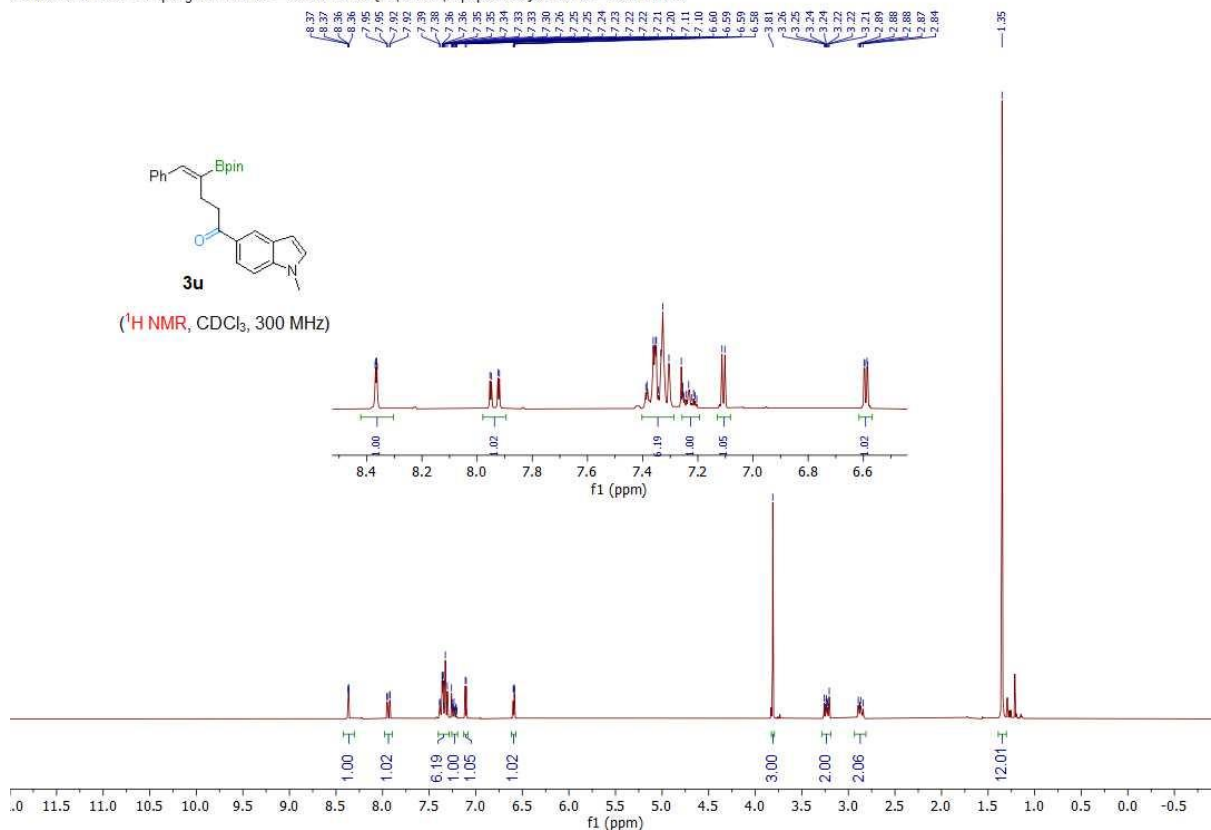

211022.338.11.fid — Fupeng Wu Ub-22 — Au13C CDCl3 {C:\Bruker\TopSpin3.6.2} 2110 38 — 75.48MHz

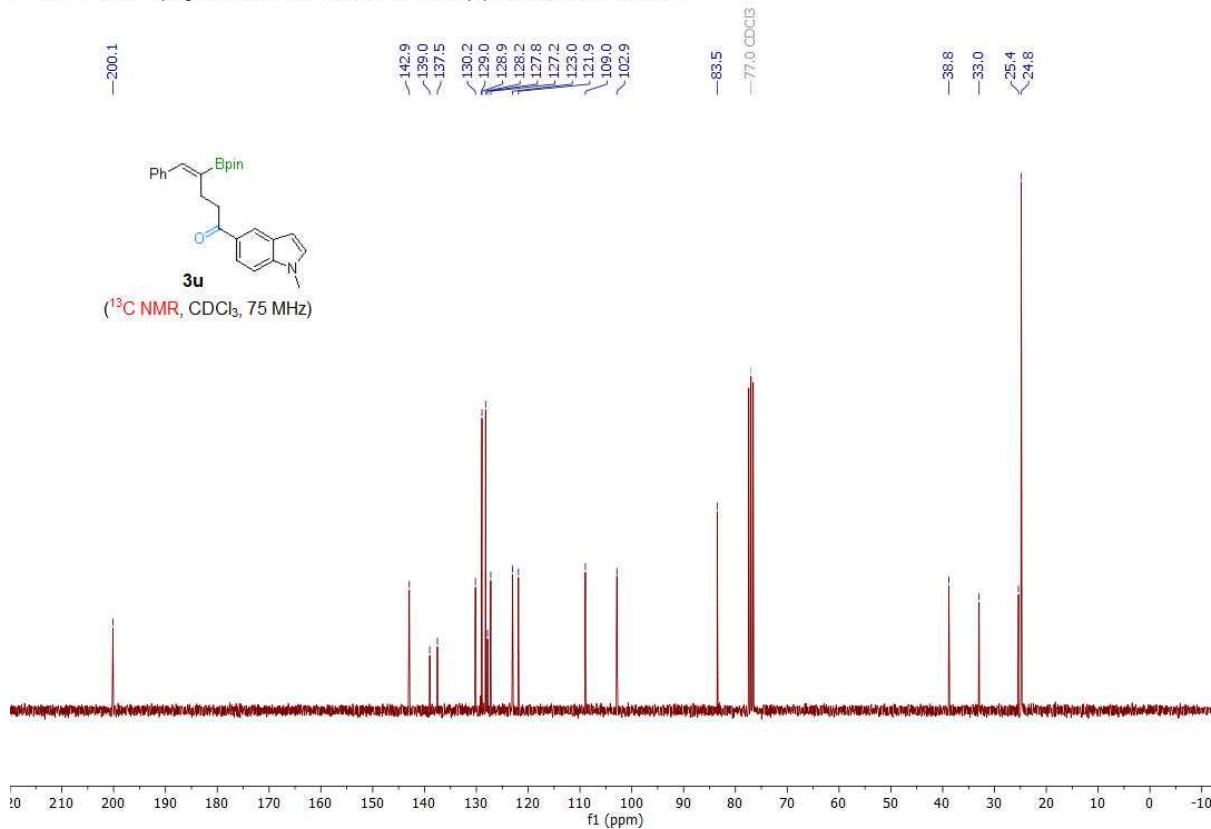

—30.4

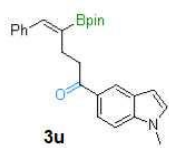

(<sup>11</sup>B NMR, CDCl<sub>3</sub>, 96 MHz)

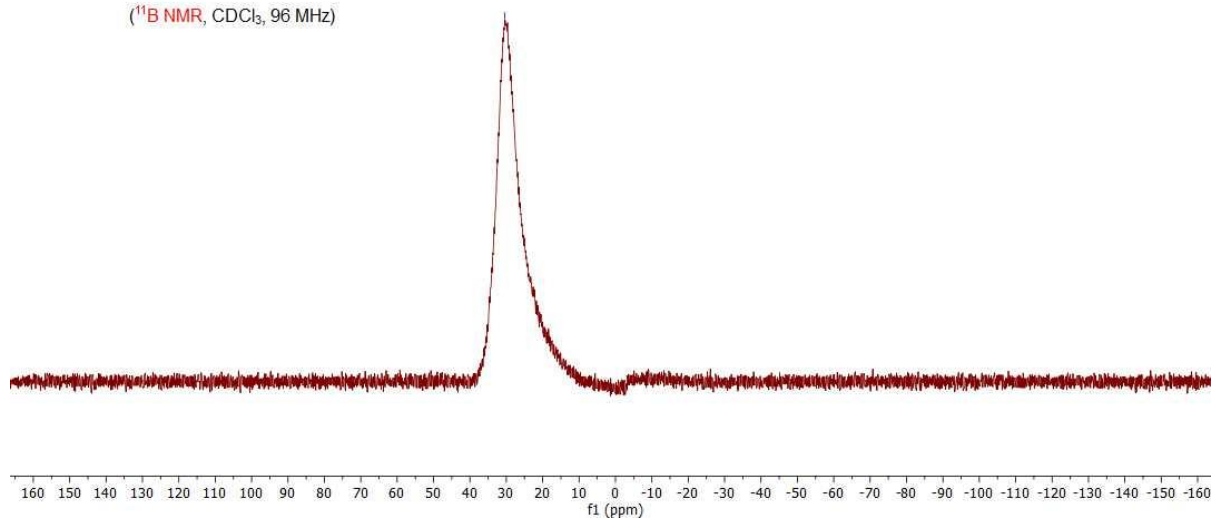

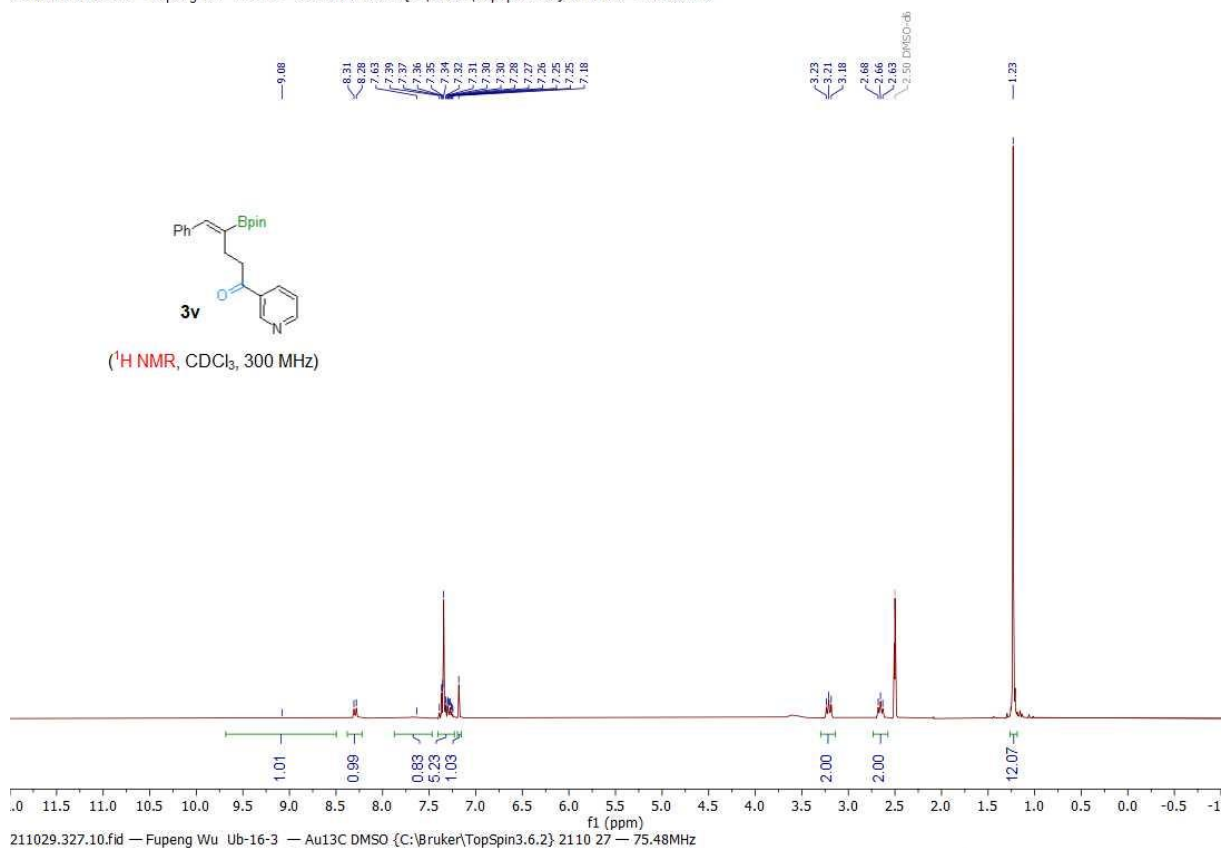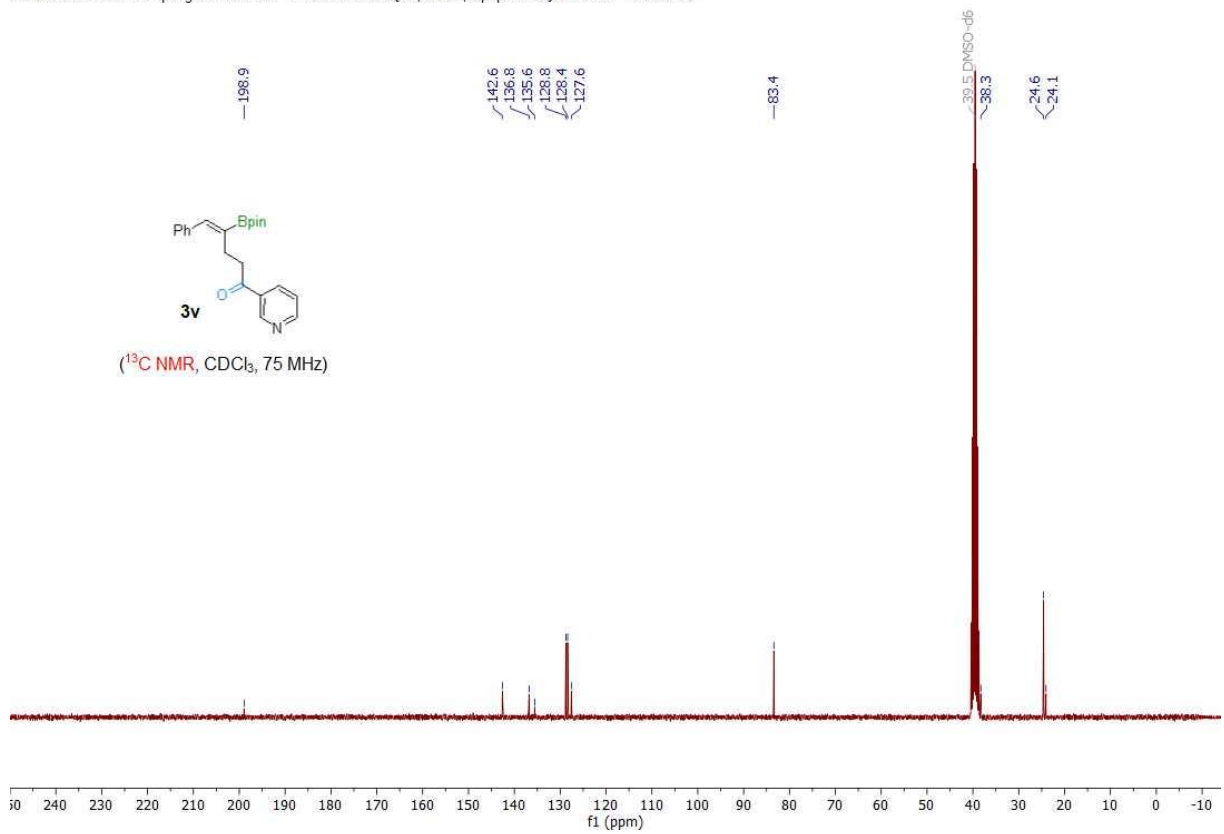

—30.4

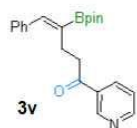

(<sup>11</sup>B NMR, CDCl<sub>3</sub>, 96 MHz)

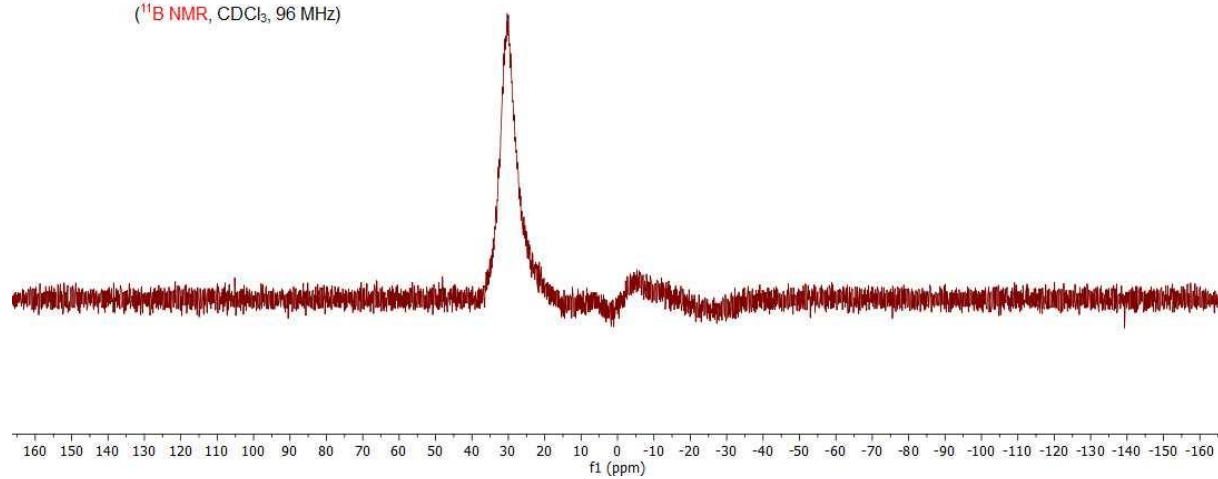

211103.308.10.fid — Fupeng Wu Ub-31-4 — Au1H CDCl3 {C:\Bruker\TopSpin3.6.2} 2111 8 — 300.13MHz

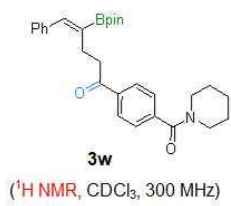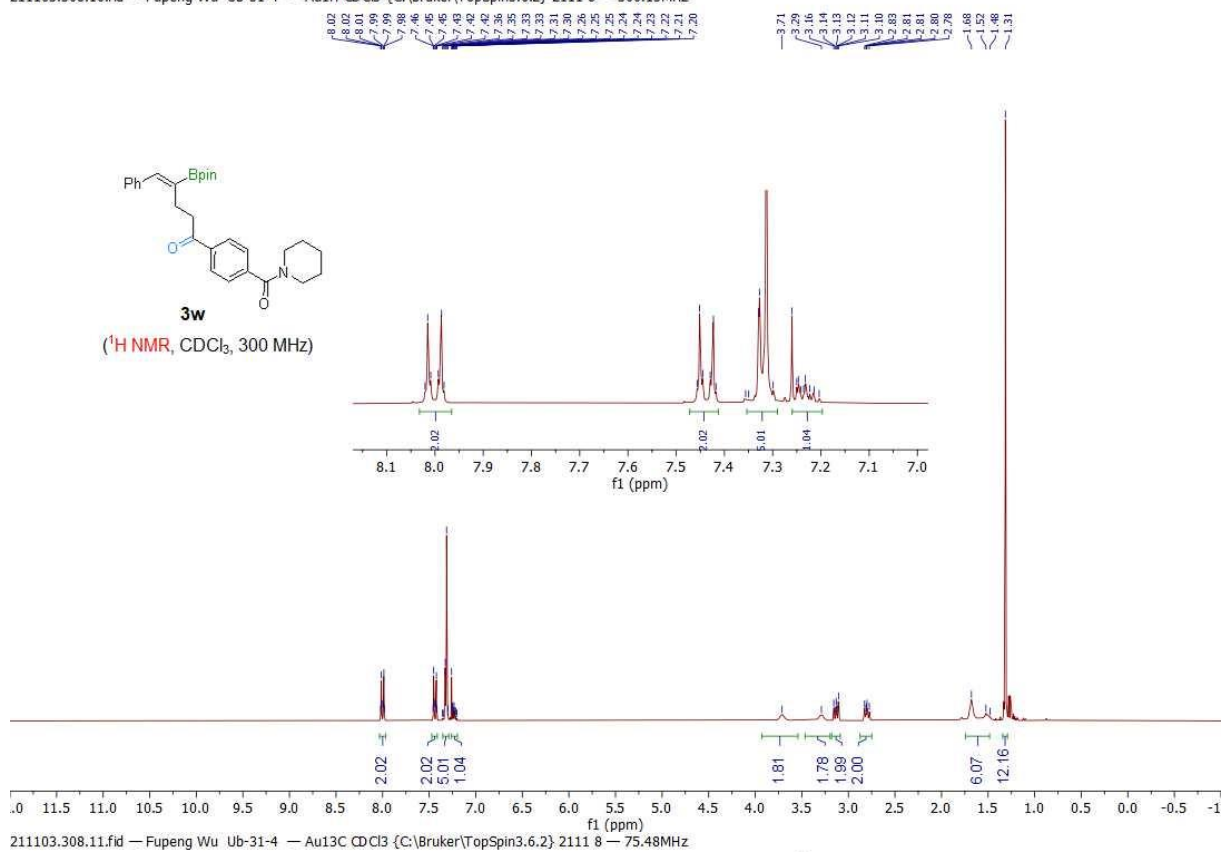

211103.308.11.fid — Fupeng Wu Ub-31-4 — Au13C CDCl3 {C:\Bruker\TopSpin3.6.2} 2111 8 — 75.48MHz

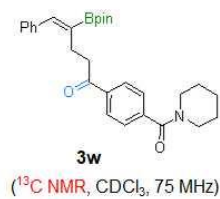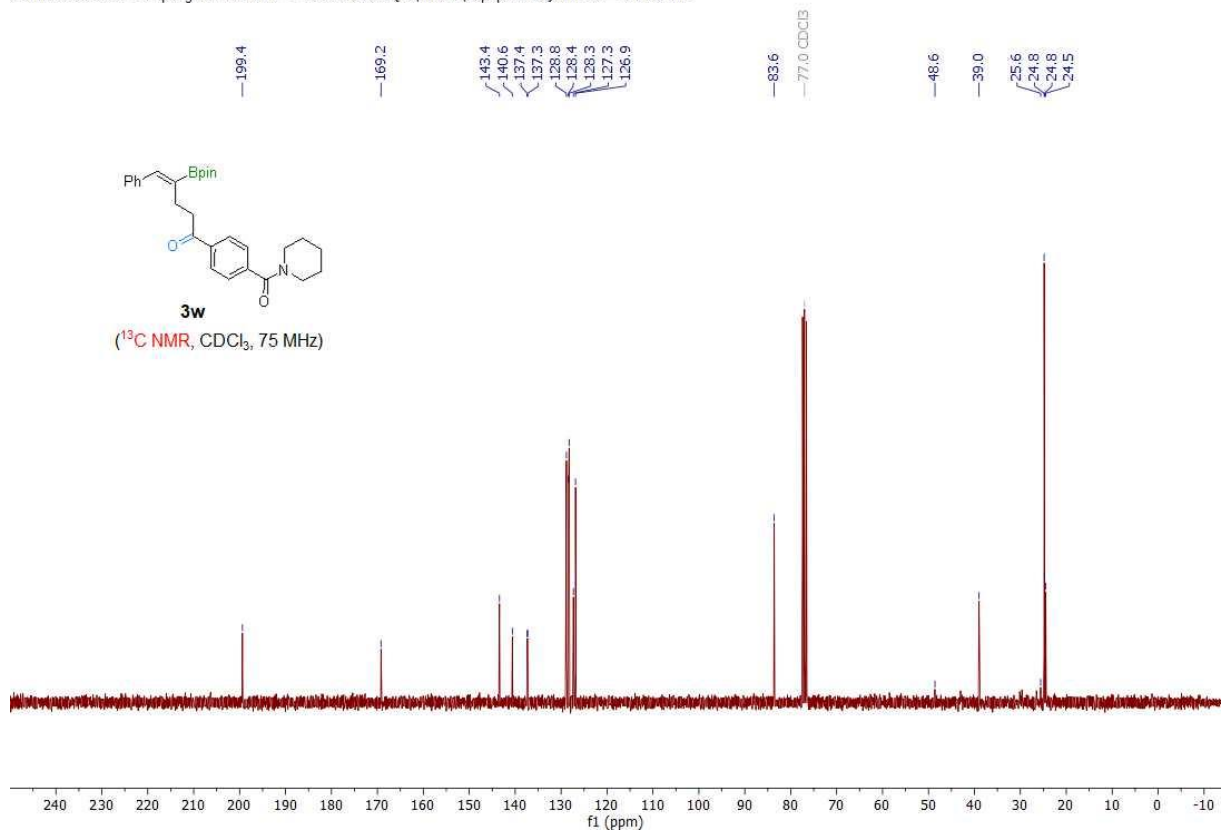



—29.7

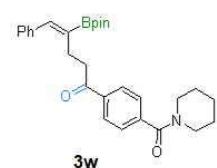

**3w**  
(<sup>11</sup>B NMR, CDCl<sub>3</sub>, 96 MHz)

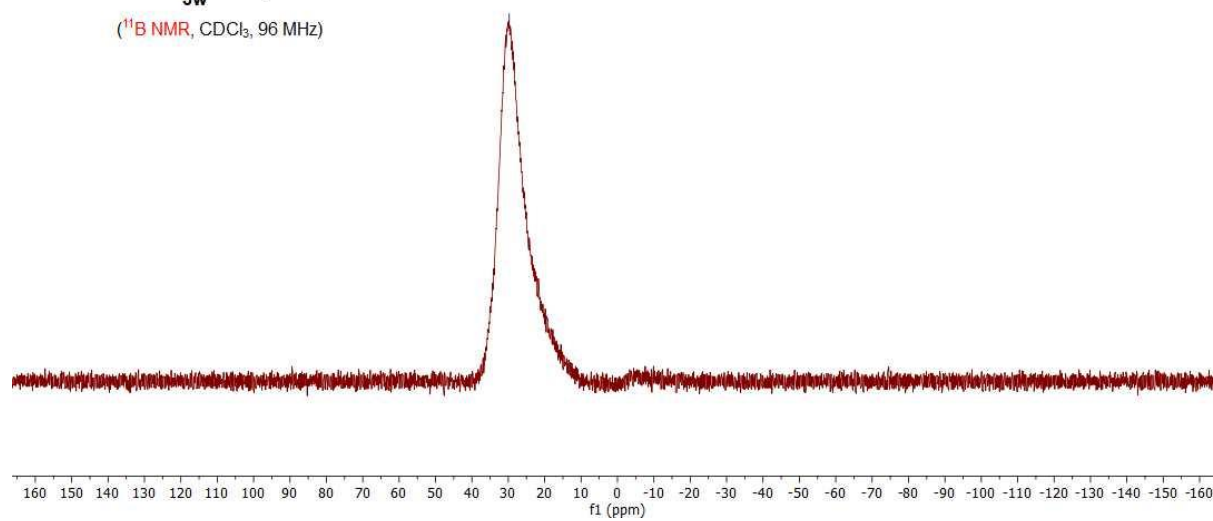

211026.331.10.fid — Fupeng Wu, Ub-28 — Au1H CDCl3 {C:\Bruker\TopSpin3.6.2} 2110 31 — 300.13MHz

7.98 7.97 7.96 7.95 7.94 7.83 7.82 7.81 7.80 7.79 7.78 7.77 7.76 7.75 7.74 7.73 7.72 7.71 7.70 7.69 7.68 7.67 7.66 7.65 7.64 7.63 7.62 7.61 7.60 7.59 7.58 7.57 7.56 7.55 7.54 7.53 7.52 7.51 7.50 7.49 7.48 7.47 7.46 7.45 7.44 7.43 7.42 7.41 7.40 7.39 7.38 7.37 7.36 7.35 7.34 7.33 7.32 7.31 7.30 7.29 7.28 7.27 7.26 7.25 7.24 7.23 7.22 7.21 7.20 7.19 7.18 7.17 7.16 7.15 7.14 7.13 7.12 7.11 7.10 7.09 7.08 7.07 7.06 7.05 7.04 7.03 7.02 7.01 7.00 6.99 6.98 6.97 6.96 6.95 6.94 6.93 6.92 6.91 6.90 6.89 6.88 6.87 6.86 6.85 6.84 6.83 6.82 6.81 6.80 6.79 6.78 6.77 6.76 6.75 6.74 6.73 6.72 6.71 6.70 6.69 6.68 6.67 6.66 6.65 6.64 6.63 6.62 6.61 6.60 6.59 6.58 6.57 6.56 6.55 6.54 6.53 6.52 6.51 6.50 6.49 6.48 6.47 6.46 6.45 6.44 6.43 6.42 6.41 6.40 6.39 6.38 6.37 6.36 6.35 6.34 6.33 6.32 6.31 6.30 6.29 6.28 6.27 6.26 6.25 6.24 6.23 6.22 6.21 6.20 6.19 6.18 6.17 6.16 6.15 6.14 6.13 6.12 6.11 6.10 6.09 6.08 6.07 6.06 6.05 6.04 6.03 6.02 6.01 6.00 5.99 5.98 5.97 5.96 5.95 5.94 5.93 5.92 5.91 5.90 5.89 5.88 5.87 5.86 5.85 5.84 5.83 5.82 5.81 5.80 5.79 5.78 5.77 5.76 5.75 5.74 5.73 5.72 5.71 5.70 5.69 5.68 5.67 5.66 5.65 5.64 5.63 5.62 5.61 5.60 5.59 5.58 5.57 5.56 5.55 5.54 5.53 5.52 5.51 5.50 5.49 5.48 5.47 5.46 5.45 5.44 5.43 5.42 5.41 5.40 5.39 5.38 5.37 5.36 5.35 5.34 5.33 5.32 5.31 5.30 5.29 5.28 5.27 5.26 5.25 5.24 5.23 5.22 5.21 5.20 5.19 5.18 5.17 5.16 5.15 5.14 5.13 5.12 5.11 5.10 5.09 5.08 5.07 5.06 5.05 5.04 5.03 5.02 5.01 5.00 4.99 4.98 4.97 4.96 4.95 4.94 4.93 4.92 4.91 4.90 4.89 4.88 4.87 4.86 4.85 4.84 4.83 4.82 4.81 4.80 4.79 4.78 4.77 4.76 4.75 4.74 4.73 4.72 4.71 4.70 4.69 4.68 4.67 4.66 4.65 4.64 4.63 4.62 4.61 4.60 4.59 4.58 4.57 4.56 4.55 4.54 4.53 4.52 4.51 4.50 4.49 4.48 4.47 4.46 4.45 4.44 4.43 4.42 4.41 4.40 4.39 4.38 4.37 4.36 4.35 4.34 4.33 4.32 4.31 4.30 4.29 4.28 4.27 4.26 4.25 4.24 4.23 4.22 4.21 4.20 4.19 4.18 4.17 4.16 4.15 4.14 4.13 4.12 4.11 4.10 4.09 4.08 4.07 4.06 4.05 4.04 4.03 4.02 4.01 4.00 3.99 3.98 3.97 3.96 3.95 3.94 3.93 3.92 3.91 3.90 3.89 3.88 3.87 3.86 3.85 3.84 3.83 3.82 3.81 3.80 3.79 3.78 3.77 3.76 3.75 3.74 3.73 3.72 3.71 3.70 3.69 3.68 3.67 3.66 3.65 3.64 3.63 3.62 3.61 3.60 3.59 3.58 3.57 3.56 3.55 3.54 3.53 3.52 3.51 3.50 3.49 3.48 3.47 3.46 3.45 3.44 3.43 3.42 3.41 3.40 3.39 3.38 3.37 3.36 3.35 3.34 3.33 3.32 3.31 3.30 3.29 3.28 3.27 3.26 3.25 3.24 3.23 3.22 3.21 3.20 3.19 3.18 3.17 3.16 3.15 3.14 3.13 3.12 3.11 3.10 3.09 3.08 3.07 3.06 3.05 3.04 3.03 3.02 3.01 3.00 2.99 2.98 2.97 2.96 2.95 2.94 2.93 2.92 2.91 2.90 2.89 2.88 2.87 2.86 2.85 2.84 2.83 2.82 2.81 2.80 2.79 2.78 2.77 2.76 2.75 2.74 2.73 2.72 2.71 2.70 2.69 2.68 2.67 2.66 2.65 2.64 2.63 2.62 2.61 2.60 2.59 2.58 2.57 2.56 2.55 2.54 2.53 2.52 2.51 2.50 2.49 2.48 2.47 2.46 2.45 2.44 2.43 2.42 2.41 2.40 2.39 2.38 2.37 2.36 2.35 2.34 2.33 2.32 2.31 2.30 2.29 2.28 2.27 2.26 2.25 2.24 2.23 2.22 2.21 2.20 2.19 2.18 2.17 2.16 2.15 2.14 2.13 2.12 2.11 2.10 2.09 2.08 2.07 2.06 2.05 2.04 2.03 2.02 2.01 2.00 1.99 1.98 1.97 1.96 1.95 1.94 1.93 1.92 1.91 1.90 1.89 1.88 1.87 1.86 1.85 1.84 1.83 1.82 1.81 1.80 1.79 1.78 1.77 1.76 1.75 1.74 1.73 1.72 1.71 1.70 1.69 1.68 1.67 1.66 1.65 1.64 1.63 1.62 1.61 1.60 1.59 1.58 1.57 1.56 1.55 1.54 1.53 1.52 1.51 1.50 1.49 1.48 1.47 1.46 1.45 1.44 1.43 1.42 1.41 1.40 1.39 1.38 1.37 1.36 1.35 1.34 1.33 1.32 1.31 1.30 1.29 1.28 1.27 1.26 1.25 1.24 1.23 1.22 1.21 1.20 1.19 1.18 1.17 1.16 1.15 1.14 1.13 1.12 1.11 1.10 1.09 1.08 1.07 1.06 1.05 1.04 1.03 1.02 1.01 1.00 0.99 0.98 0.97 0.96 0.95 0.94 0.93 0.92 0.91 0.90 0.89 0.88 0.87 0.86 0.85 0.84 0.83 0.82 0.81 0.80 0.79 0.78 0.77 0.76 0.75 0.74 0.73 0.72 0.71 0.70 0.69 0.68 0.67 0.66 0.65 0.64 0.63 0.62 0.61 0.60 0.59 0.58 0.57 0.56 0.55 0.54 0.53 0.52 0.51 0.50 0.49 0.48 0.47 0.46 0.45 0.44 0.43 0.42 0.41 0.40 0.39 0.38 0.37 0.36 0.35 0.34 0.33 0.32 0.31 0.30 0.29 0.28 0.27 0.26 0.25 0.24 0.23 0.22 0.21 0.20 0.19 0.18 0.17 0.16 0.15 0.14 0.13 0.12 0.11 0.10 0.09 0.08 0.07 0.06 0.05 0.04 0.03 0.02 0.01 0.00 -0.01 -0.02 -0.03 -0.04 -0.05 -0.06 -0.07 -0.08 -0.09 -0.10

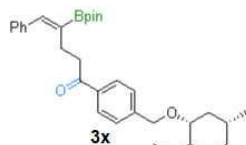

(<sup>1</sup>H NMR, CDCl<sub>3</sub>, 300 MHz)

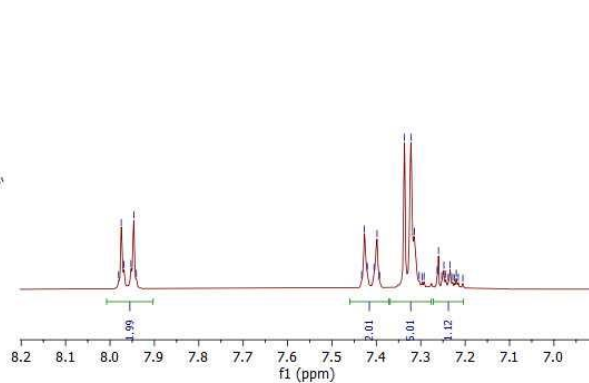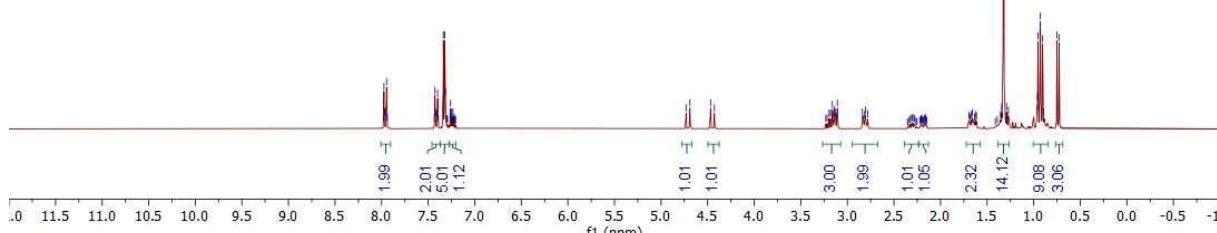

211026.331.11.fid — Fupeng Wu, Ub-28 — Au13C CDCl3 {C:\Bruker\TopSpin3.6.2} 2110 31 — 75.48MHz

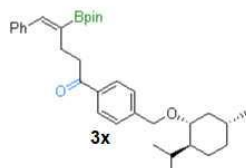

(<sup>13</sup>C NMR, CDCl<sub>3</sub>, 75 MHz)

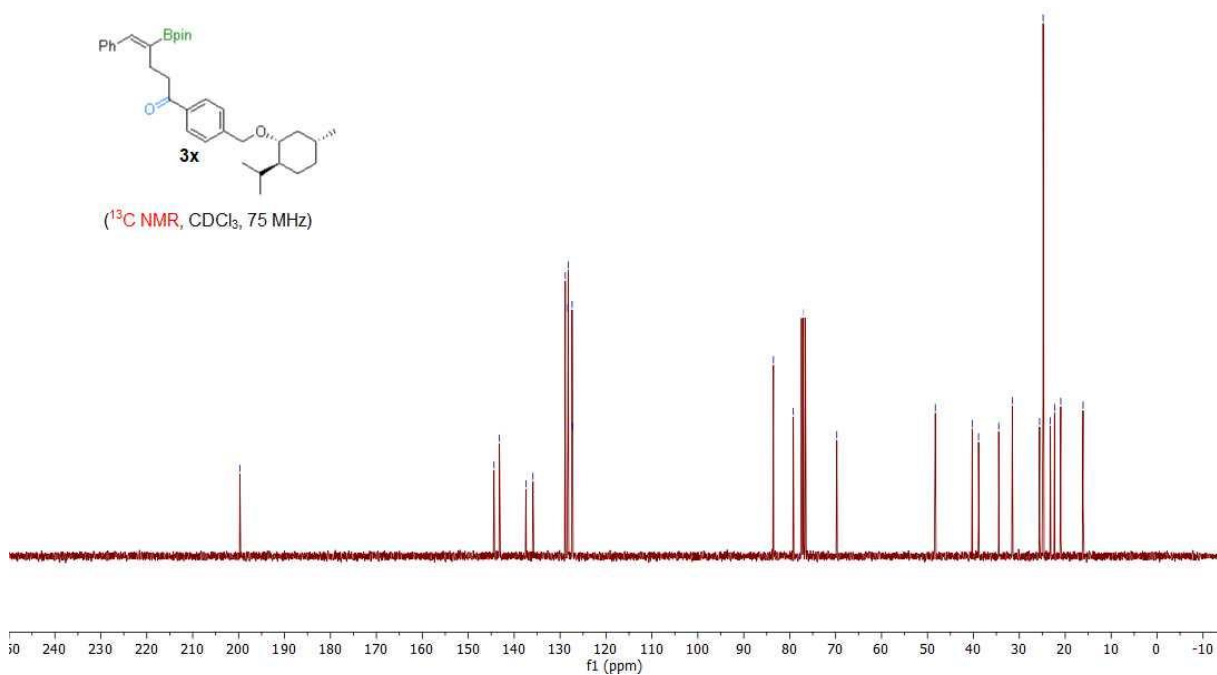

— 29.9

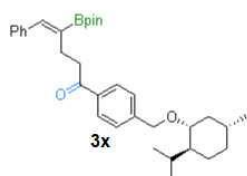

(<sup>11</sup>B NMR, CDCl<sub>3</sub>, 96 MHz)

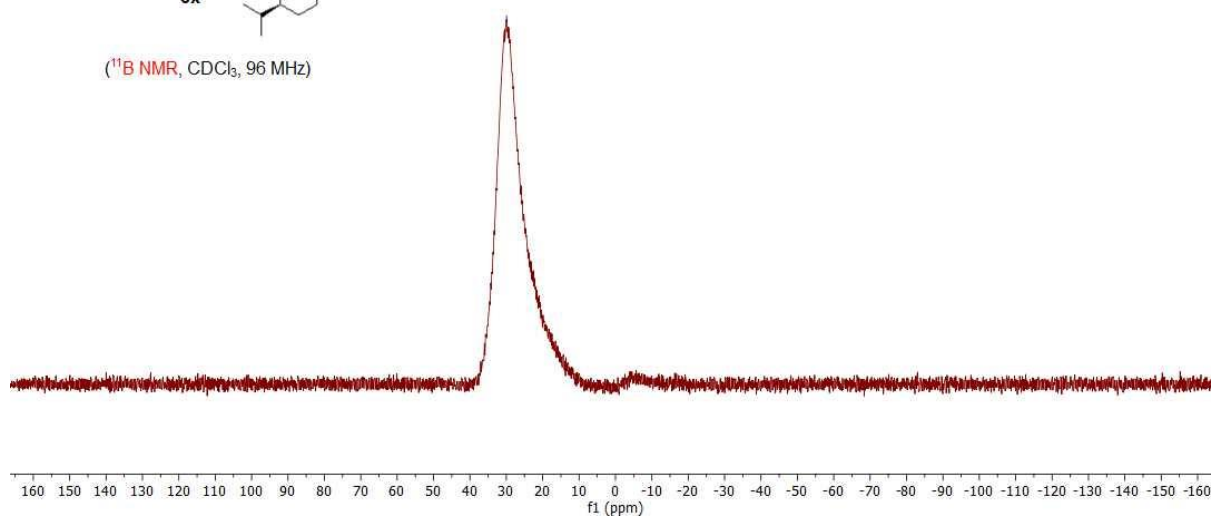



— 30.1

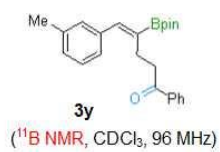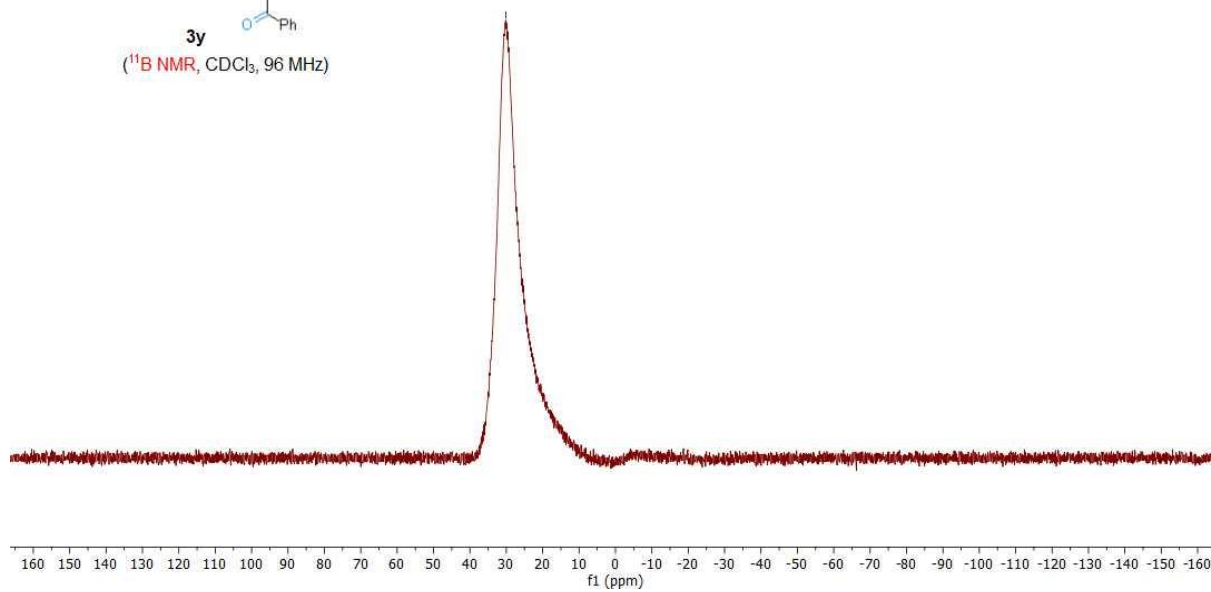

211101.330.10.fid — Fupeng Wu Ub-36 — Au1H CDCl3 {C:\Bruker\TopSpin3.6.2} 2111 30 — 300.13MHz

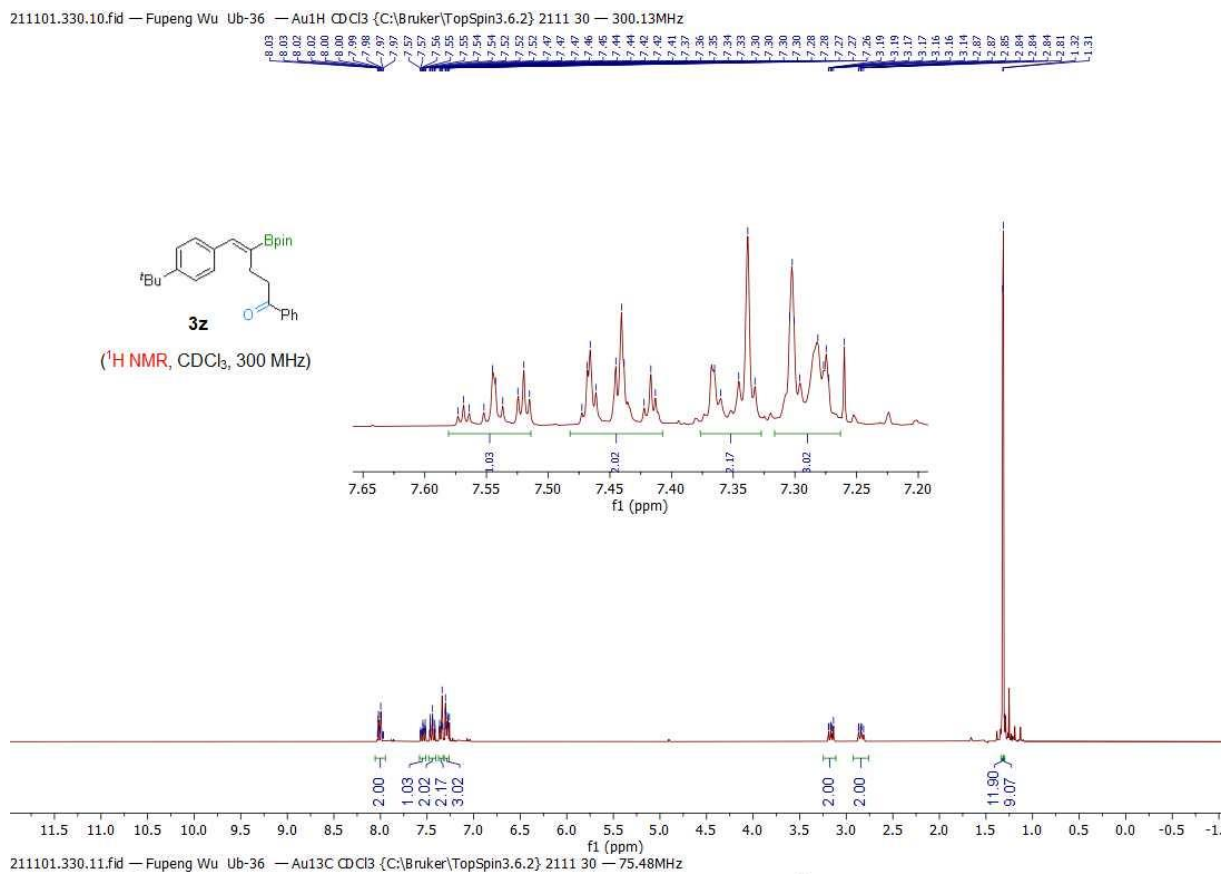

211101.330.11.fid — Fupeng Wu Ub-36 — Au13C CDCl3 {C:\Bruker\TopSpin3.6.2} 2111 30 — 75.48MHz

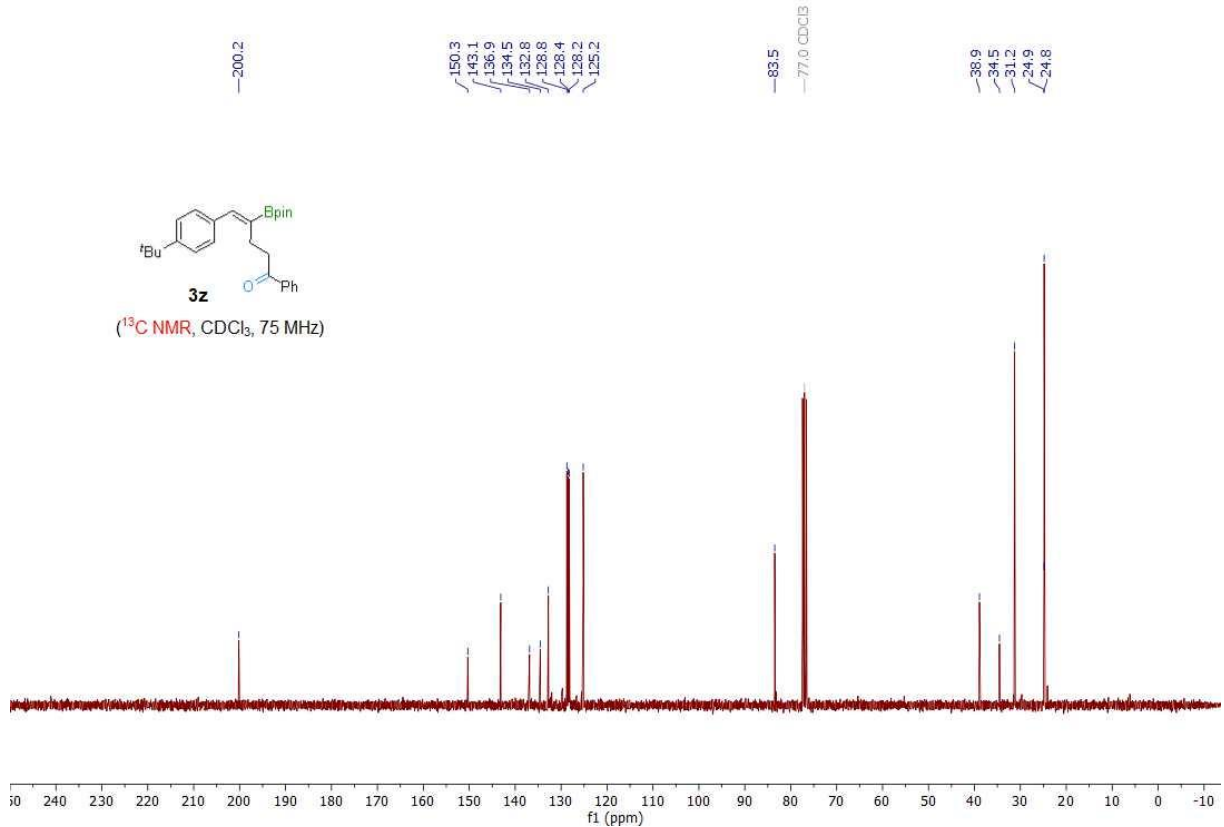

—30.1

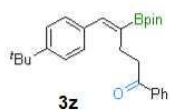

(<sup>11</sup>B NMR, CDCl<sub>3</sub>, 96 MHz)

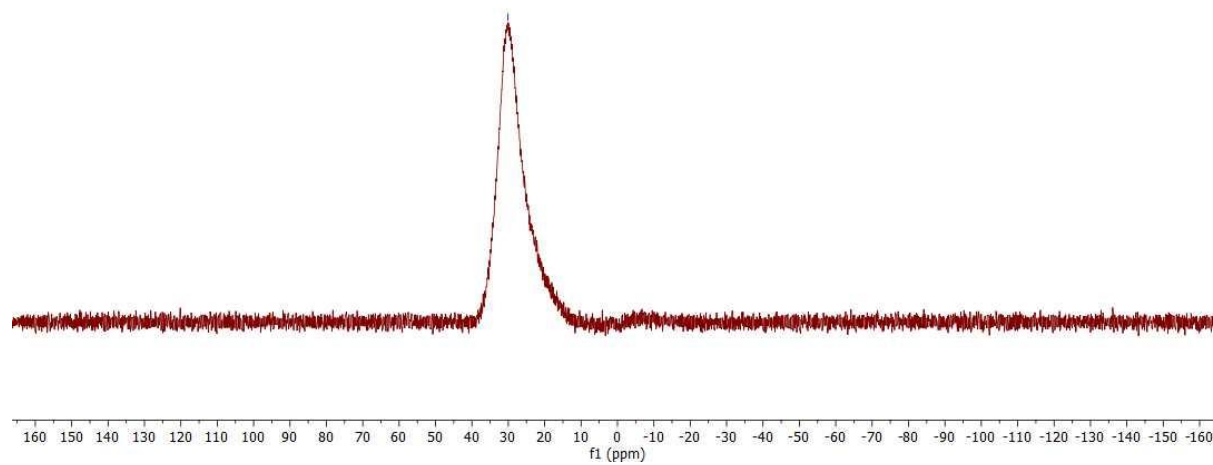

211103.307.10.fid — Fupeng Wu Ub-33 — Au1H CDCl3 {C:\Bruker\TopSpin3.6.2} 2111 7 — 300.13MHz

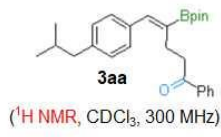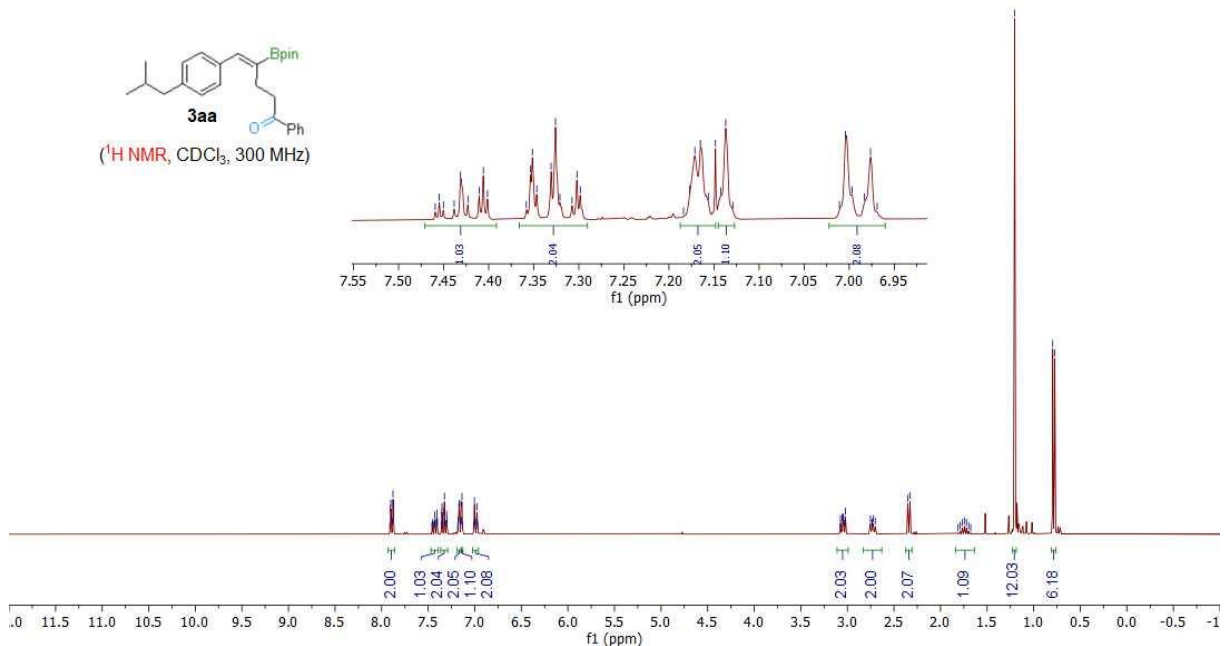

211103.307.11.fid — Fupeng Wu Ub-33 — Au13C CDCl3 {C:\Bruker\TopSpin3.6.2} 2111 7 — 75.48MHz

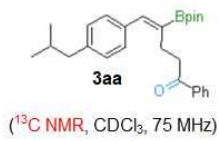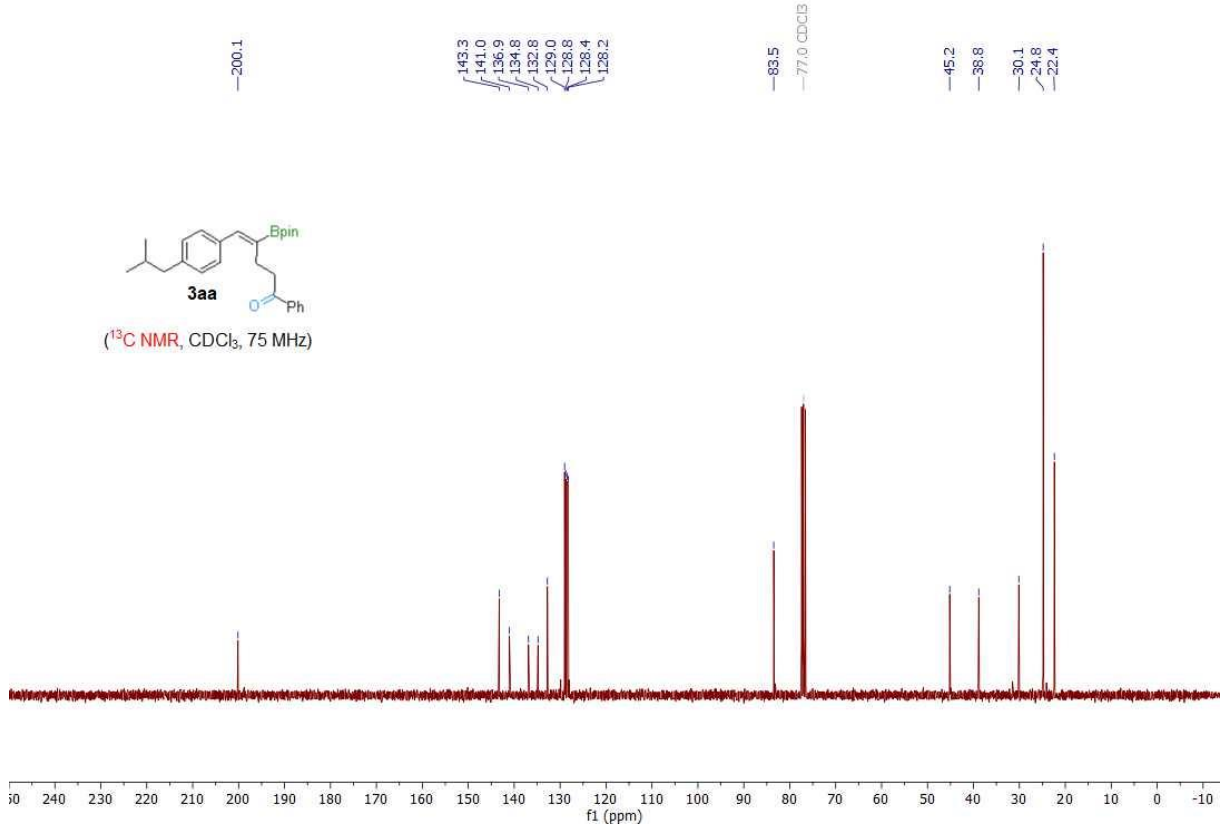



—30.3

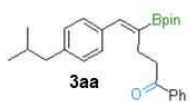

(<sup>11</sup>B NMR, CDCl<sub>3</sub>, 96 MHz)

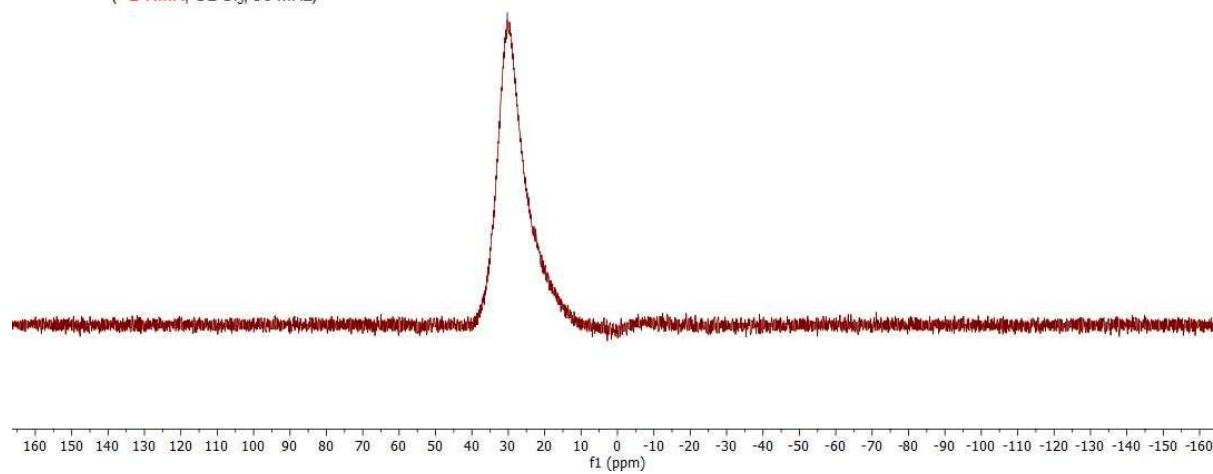

211111.304.10.fid — Fupeng Wu Ub-51 — Au1H CDCl3 {C:\Bruker\TopSpin3.6.2} 2111 4 — 300.13MHz

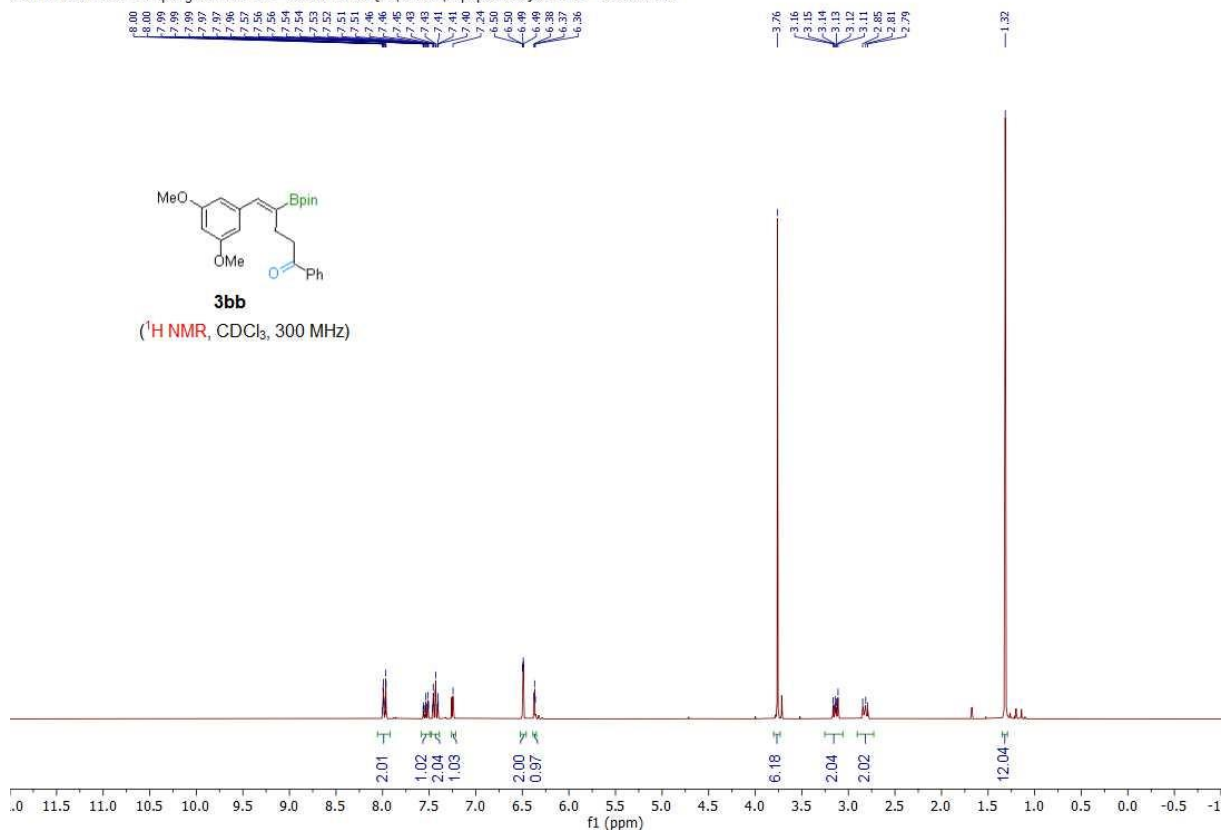

211111.304.11.fid — Fupeng Wu Ub-51 — Au13C CDCl3 {C:\Bruker\TopSpin3.6.2} 2111 4 — 75.48MHz

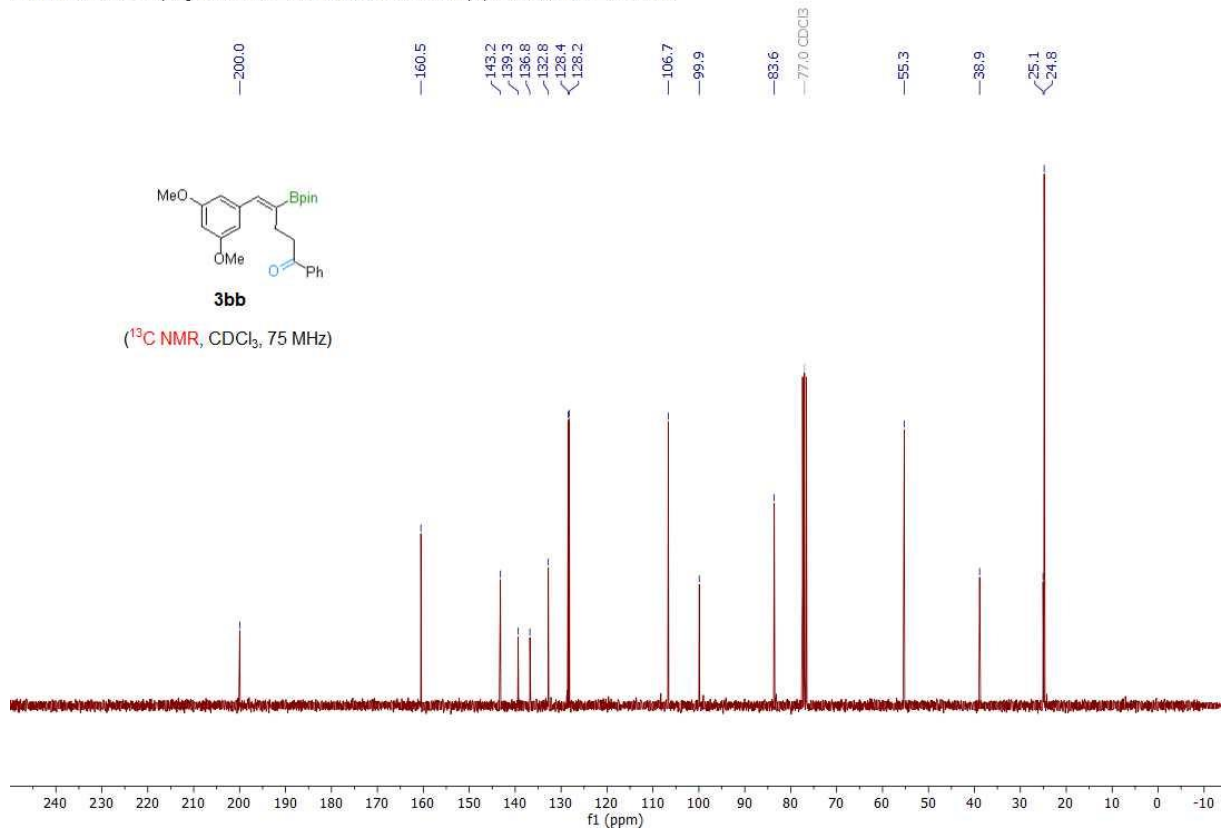

30.8

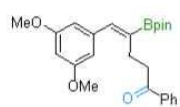

**3bb**  
(<sup>1</sup>B NMR, CDCl<sub>3</sub>, 96 MHz)

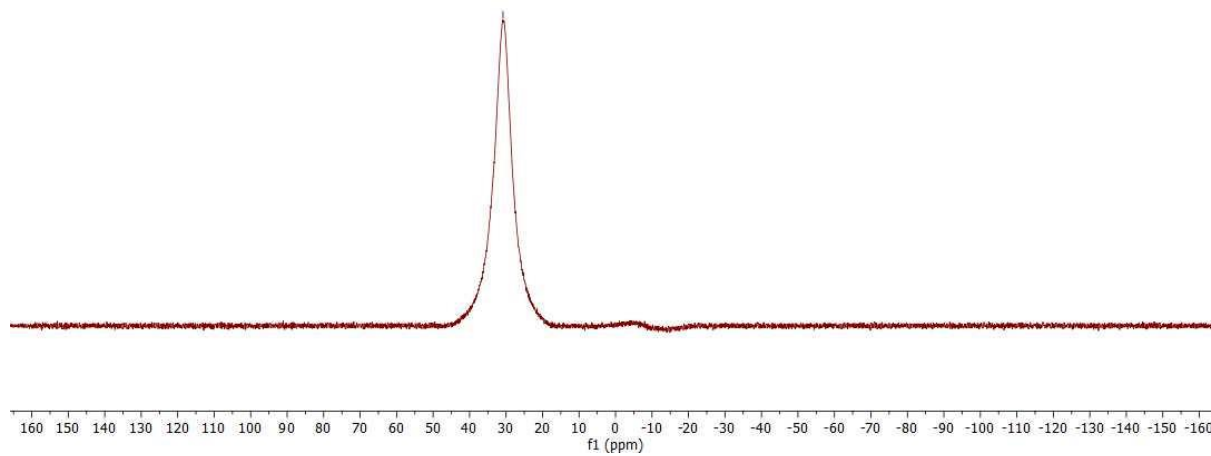

211108.439.10.fid — Fupeng Wu Ub-42 — Au1H CDCl3 {C:\Bruker\TopSpin3.5pl6} 2111 39 — 400.13MHz

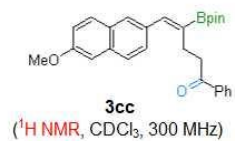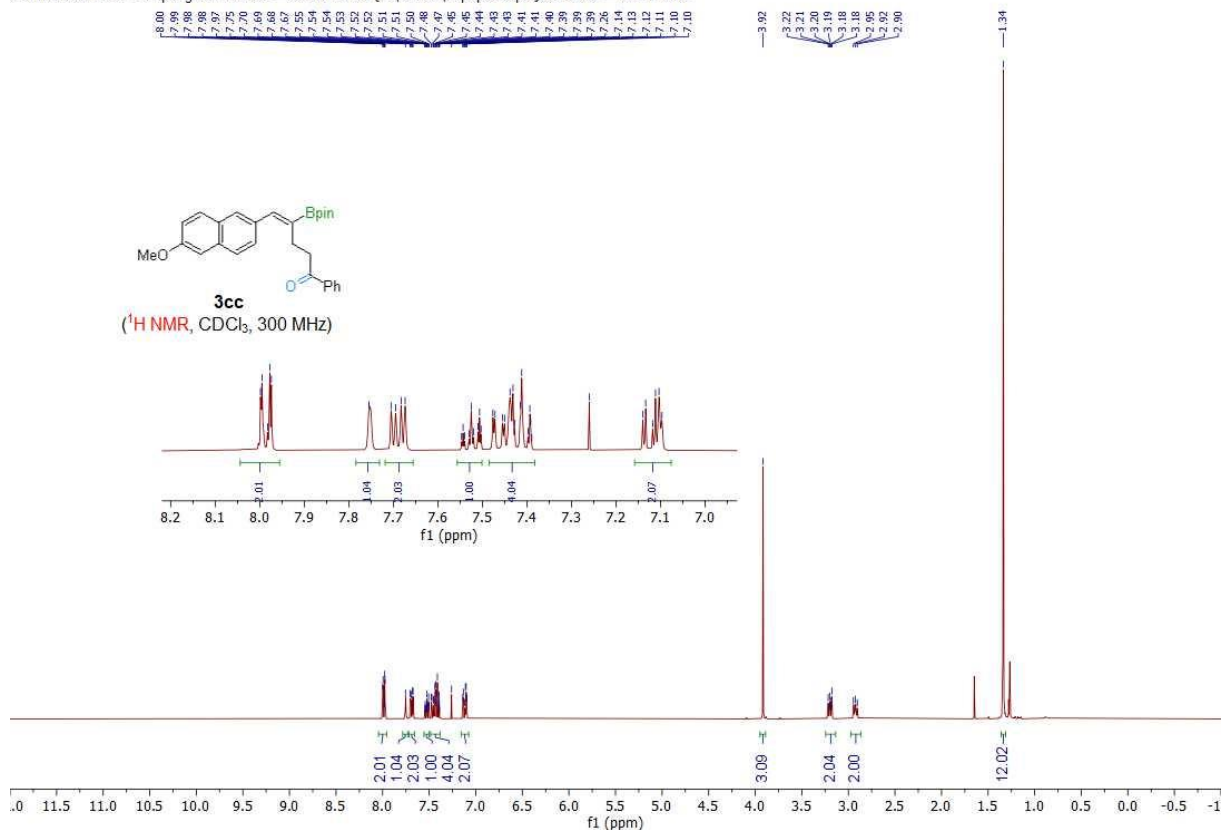

211108.439.11.fid — Fupeng Wu Ub-42 — Au13C CDCl3 {C:\Bruker\TopSpin3.5pl6} 2111 39 — 100.63MHz

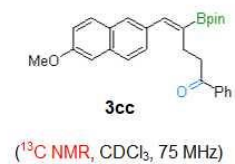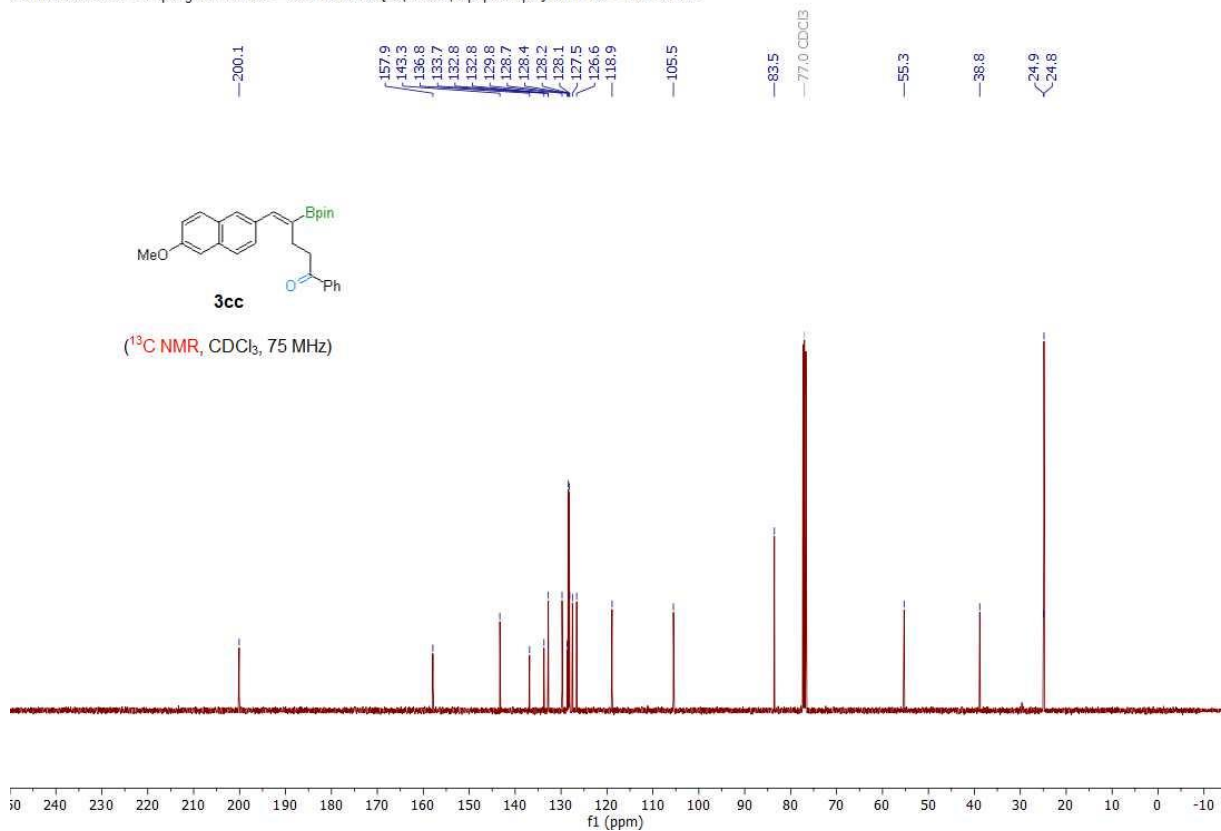

—30.5

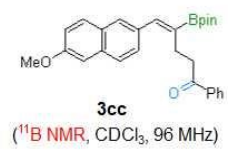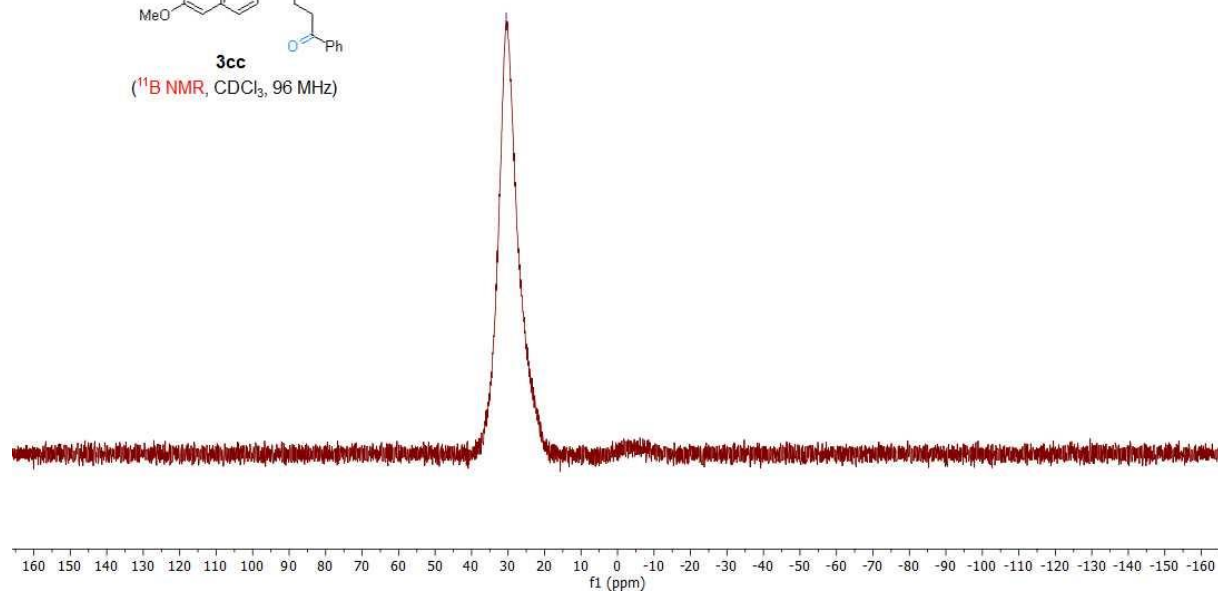

211125.333.10.fid — Fupeng Wu Ub-52 — Au1H CDCl3 {C:\Bruker\TopSpin3.6.2} 2111 33 — 300.13MHz

8.02, 8.01, 8.00, 7.99, 7.98, 7.95, 7.93, 7.92, 7.91, 7.89, 7.84, 7.83, 7.82, 7.81, 7.79, 7.73, 7.32, 7.31, 7.30, 7.29, 6.89, 6.88, 6.86, 6.85, 6.84, 3.90, 3.18, 3.17, 3.16, 3.15, 3.14, 3.13, 2.86, 2.83, 2.81, -1.31

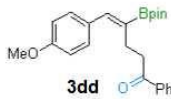

3dd

(<sup>1</sup>H NMR, CDCl<sub>3</sub>, 300 MHz)

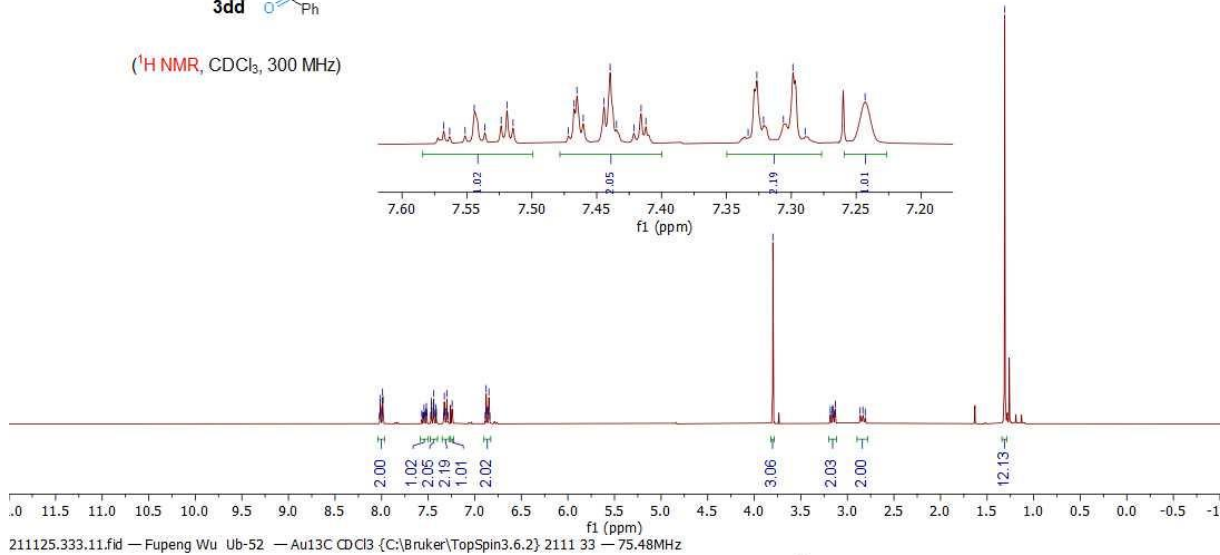

211125.333.11.fid — Fupeng Wu Ub-52 — Au13C CDCl3 {C:\Bruker\TopSpin3.6.2} 2111 33 — 75.48MHz

200.1, 158.8, 142.8, 136.9, 132.8, 130.5, 130.1, 128.4, 128.2, 113.7, 83.4, 77.0 CDCl3, 55.2, 38.8, 24.8, 24.7

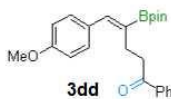

3dd

(<sup>13</sup>C NMR, CDCl<sub>3</sub>, 75 MHz)

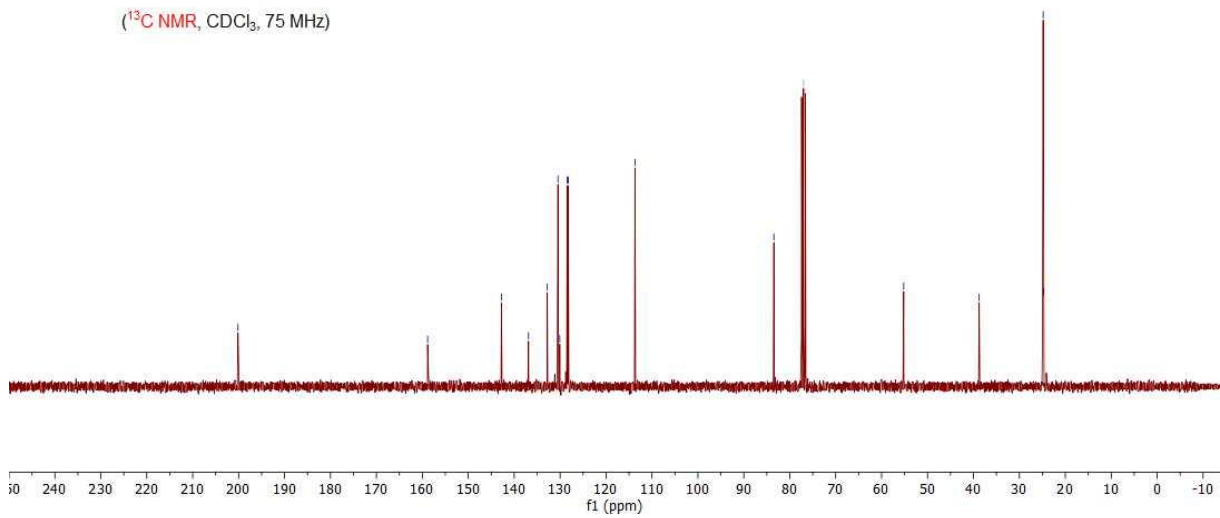

—30.2

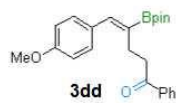

(<sup>11</sup>B NMR, CDCl<sub>3</sub>, 96 MHz)

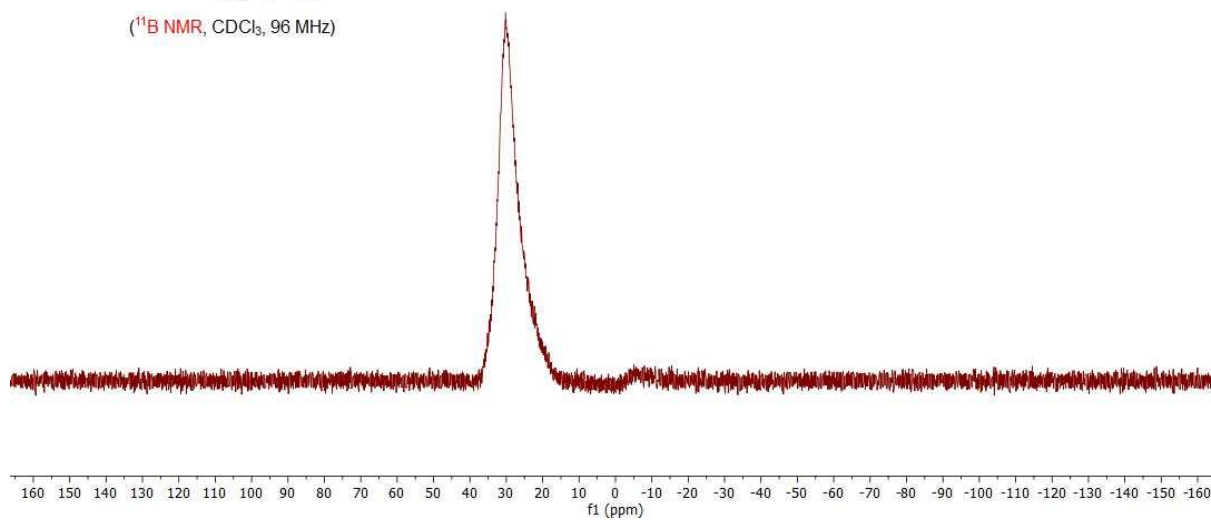

211105.444.10.fid — Fupeng Wu Ub-43 — Au1H CDCl3 {C:\Bruker\TopSpin3.5pl6} 2111 44 — 400.13MHz

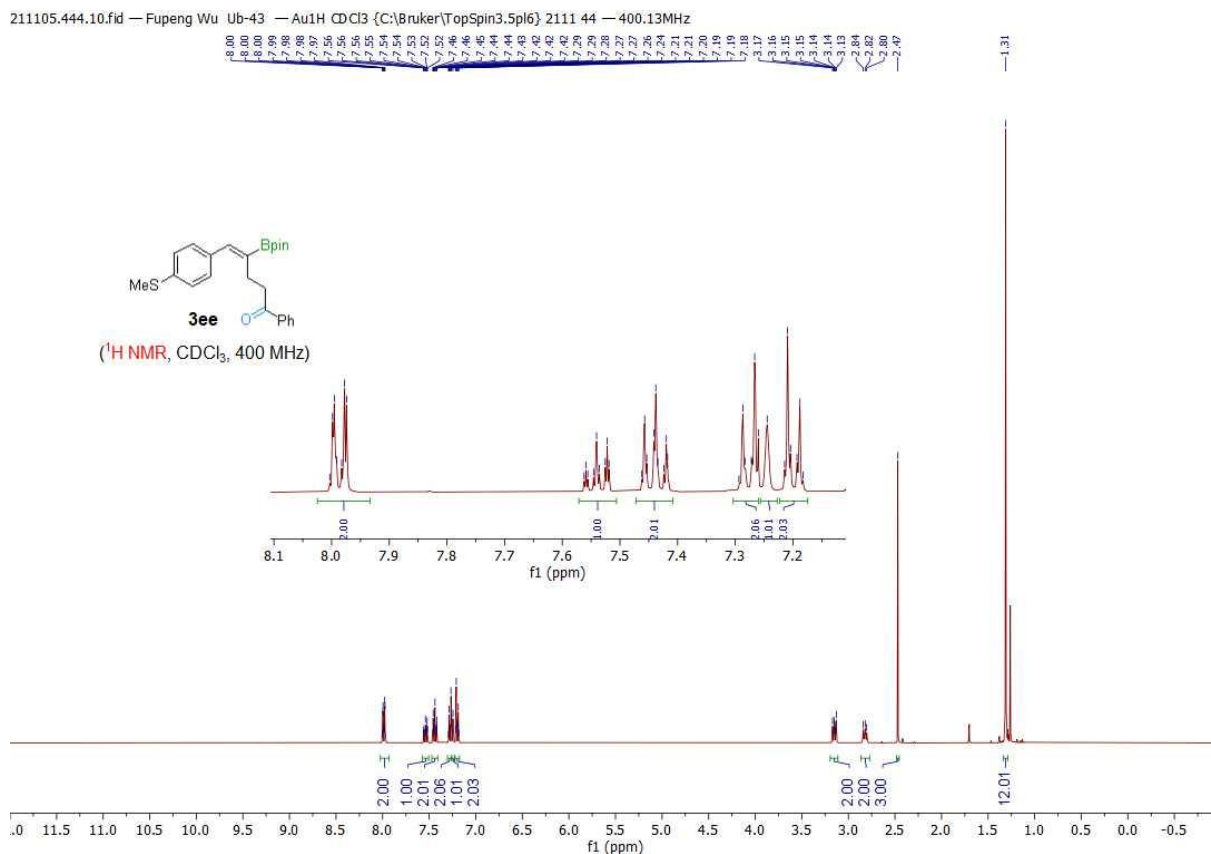

211105.444.11.fid — Fupeng Wu Ub-43 — Au13C CDCl3 {C:\Bruker\TopSpin3.5pl6} 2111 44 — 100.63MHz

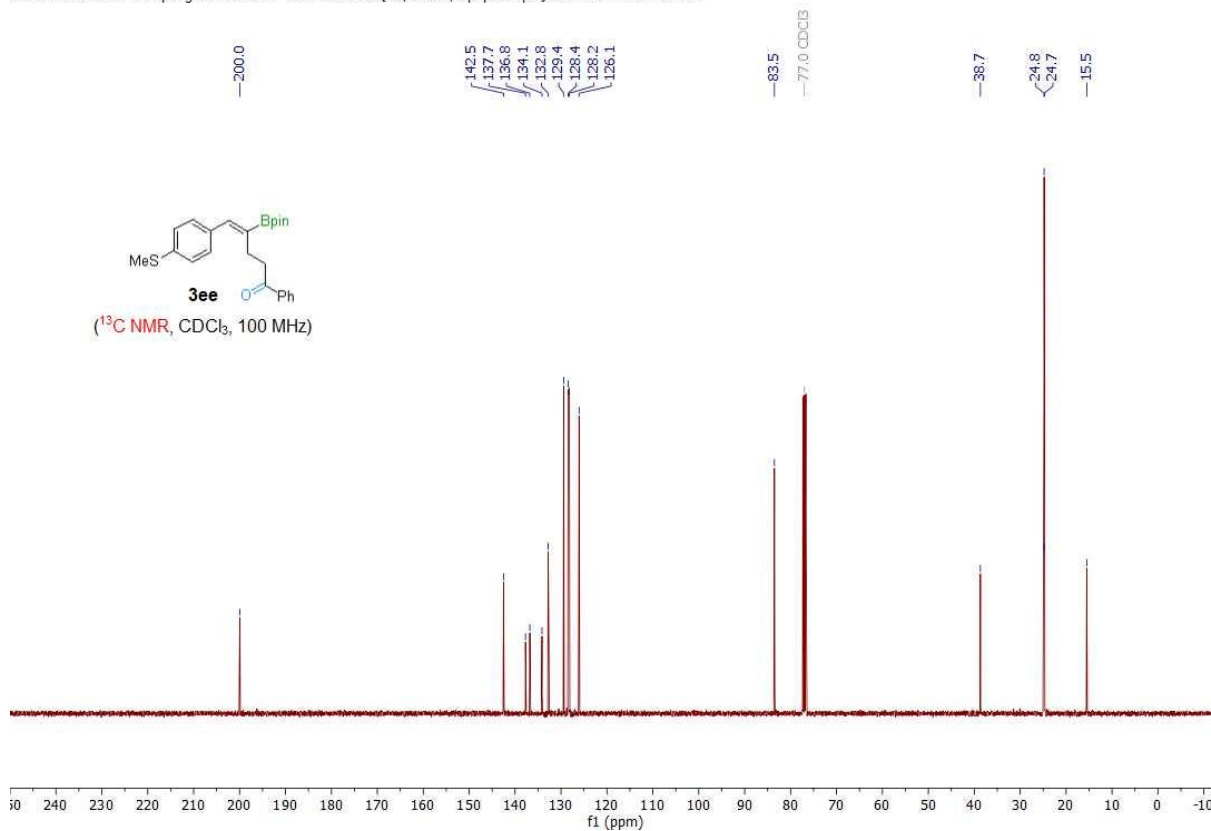



30.6

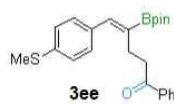

(<sup>11</sup>B NMR, CDCl<sub>3</sub>, 128 MHz)

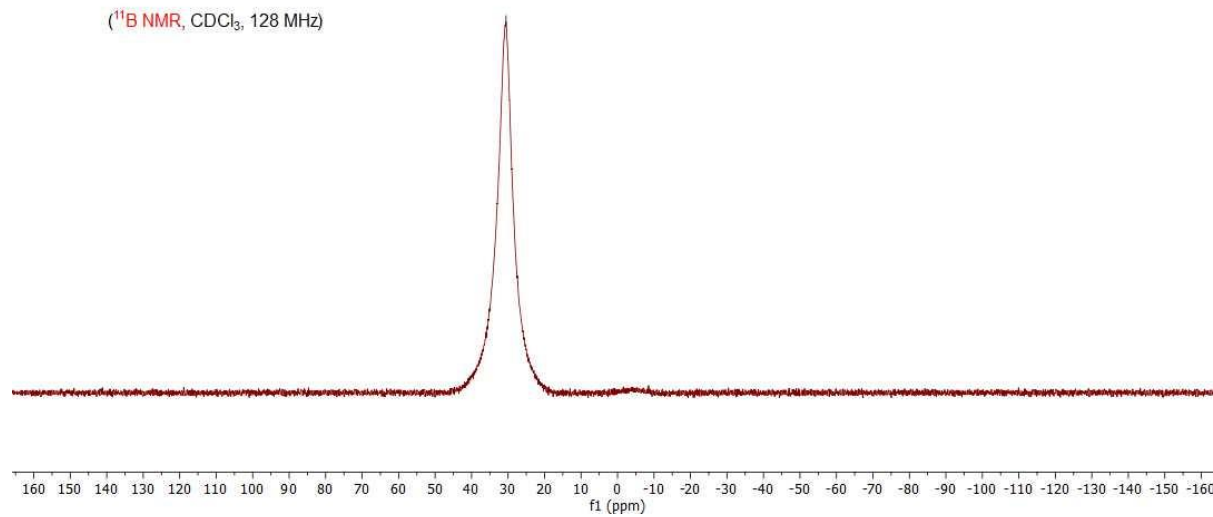

211111.307.10.fid — Fupeng Wu Ub-48 — Au1H CDCl3 {C:\Bruker\TopSpin3.6.2} 2111 7 — 300.13MHz

8.01  
8.01  
8.00  
7.99  
7.97  
7.97  
7.97  
7.95  
7.54  
7.53  
7.52  
7.52  
7.47  
7.46  
7.44  
7.44  
7.43  
7.41  
7.41  
7.26  
7.20  
5.84

3.17  
3.15  
3.14  
3.13  
3.12  
3.11  
2.89  
2.81  
2.78

1.30

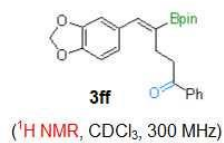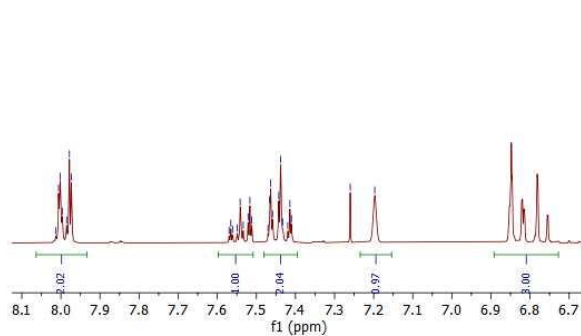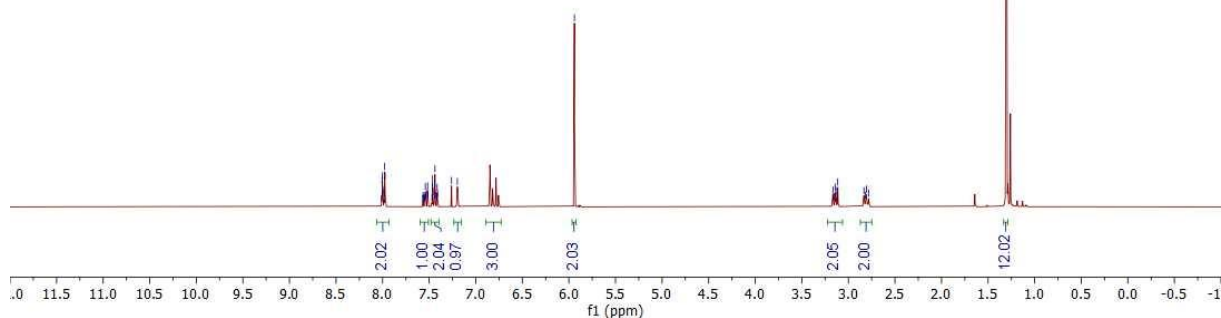

211111.307.11.fid — Fupeng Wu Ub-48 — Au13C CDCl3 {C:\Bruker\TopSpin3.6.2} 2111 7 — 75.48MHz

200.0

147.5  
146.8  
142.8  
136.9  
132.8  
131.6  
128.4  
128.2  
123.1

109.1  
108.2  
101.0

83.5  
77.0 CDCl3

38.7

24.8  
24.7

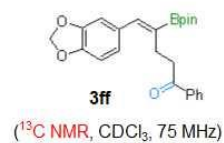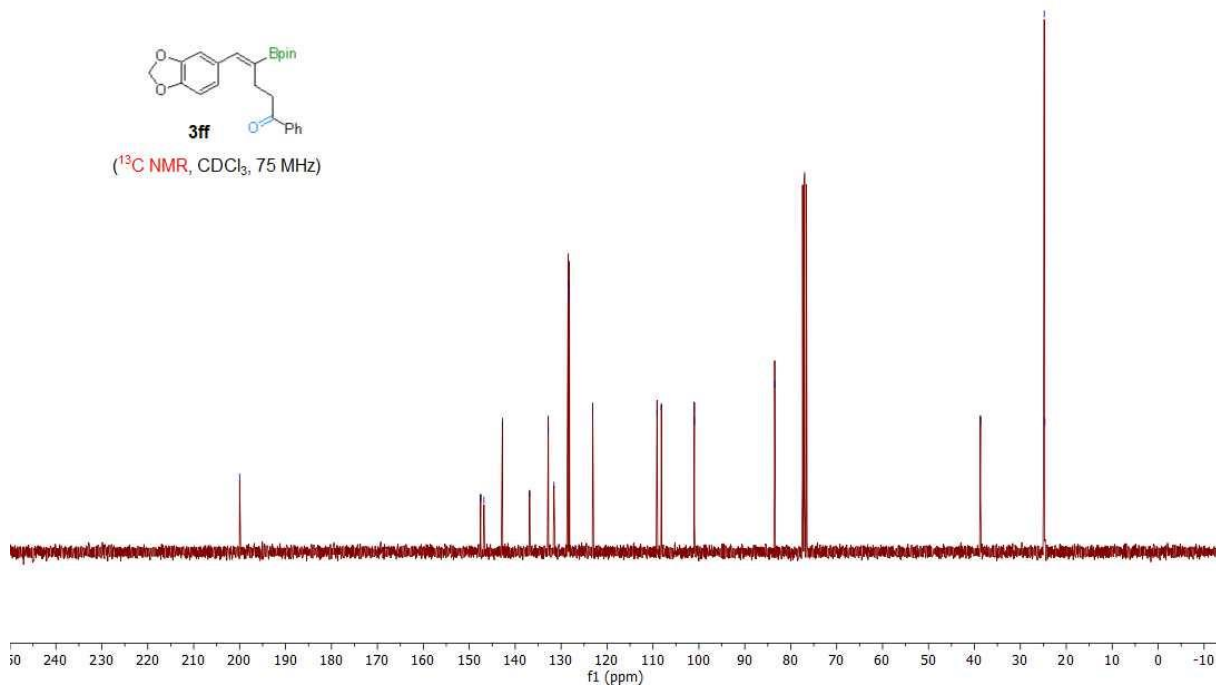

—90.1

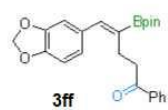

(<sup>1</sup>B NMR, CDCl<sub>3</sub>, 96 MHz)

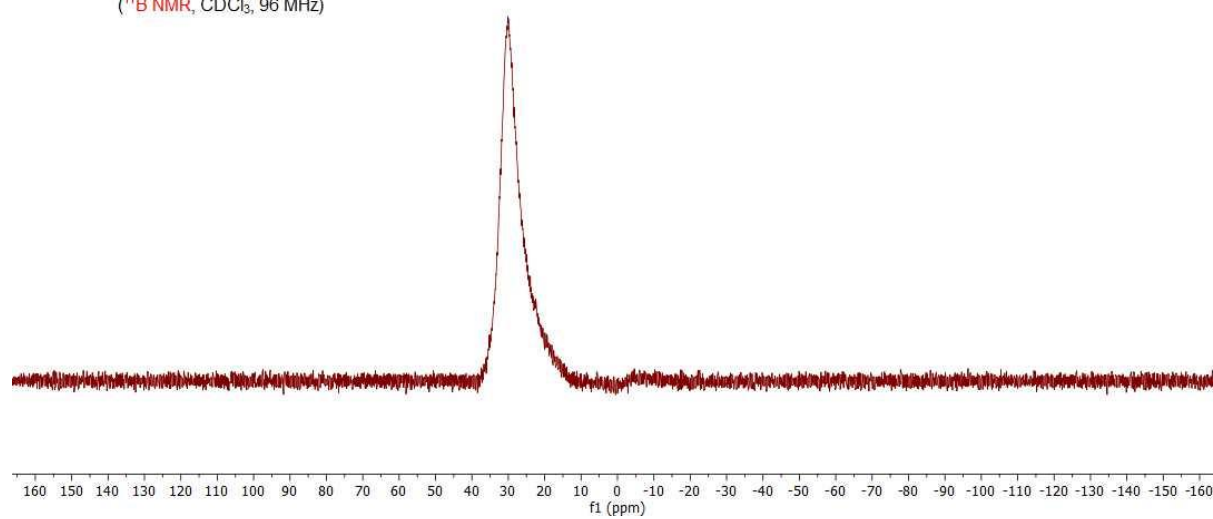

211103.311.10.fid — Fupeng Wu Ub-39 — Au1H CDCl3 {C:\Bruker\TopSpin3.6.2} 2111 11 — 300.13MHz

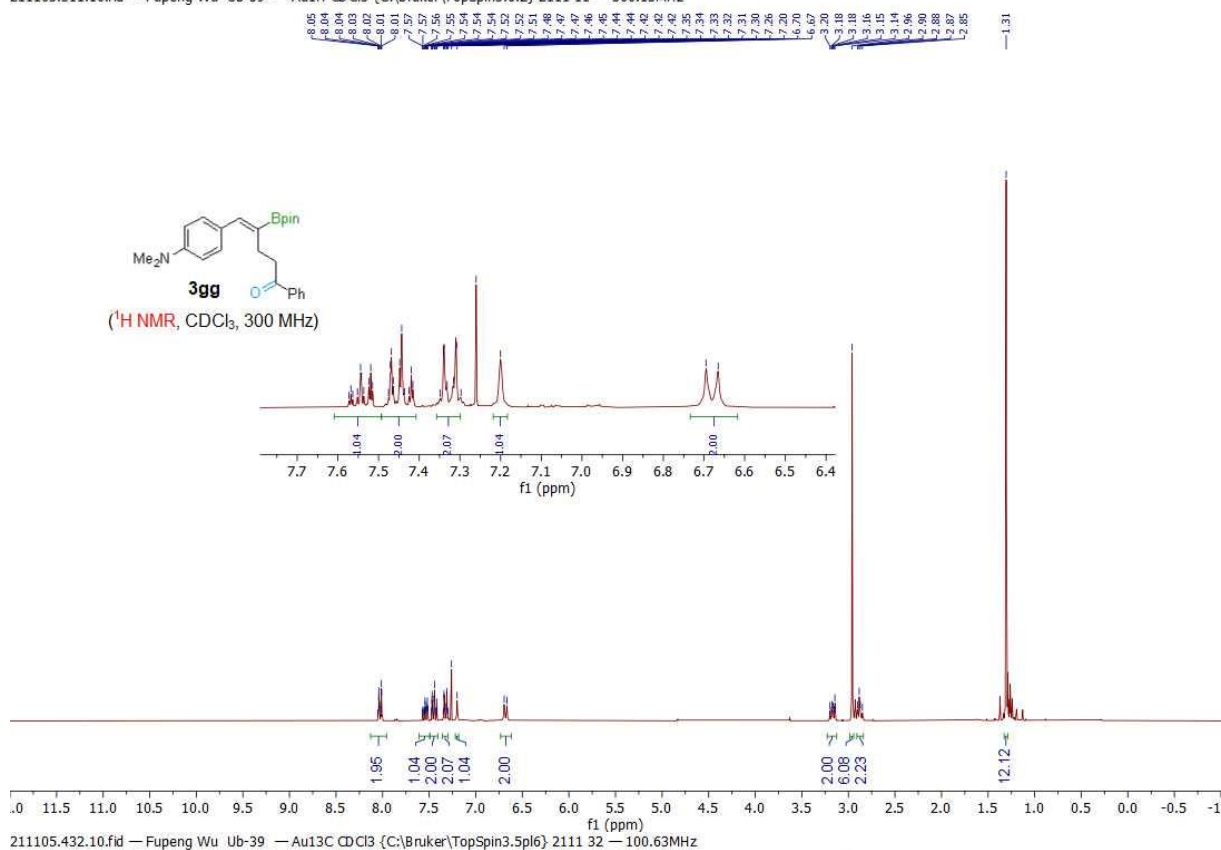

211105.432.10.fid — Fupeng Wu Ub-39 — Au13C CDCl3 {C:\Bruker\TopSpin3.5pl6} 2111 32 — 100.63MHz

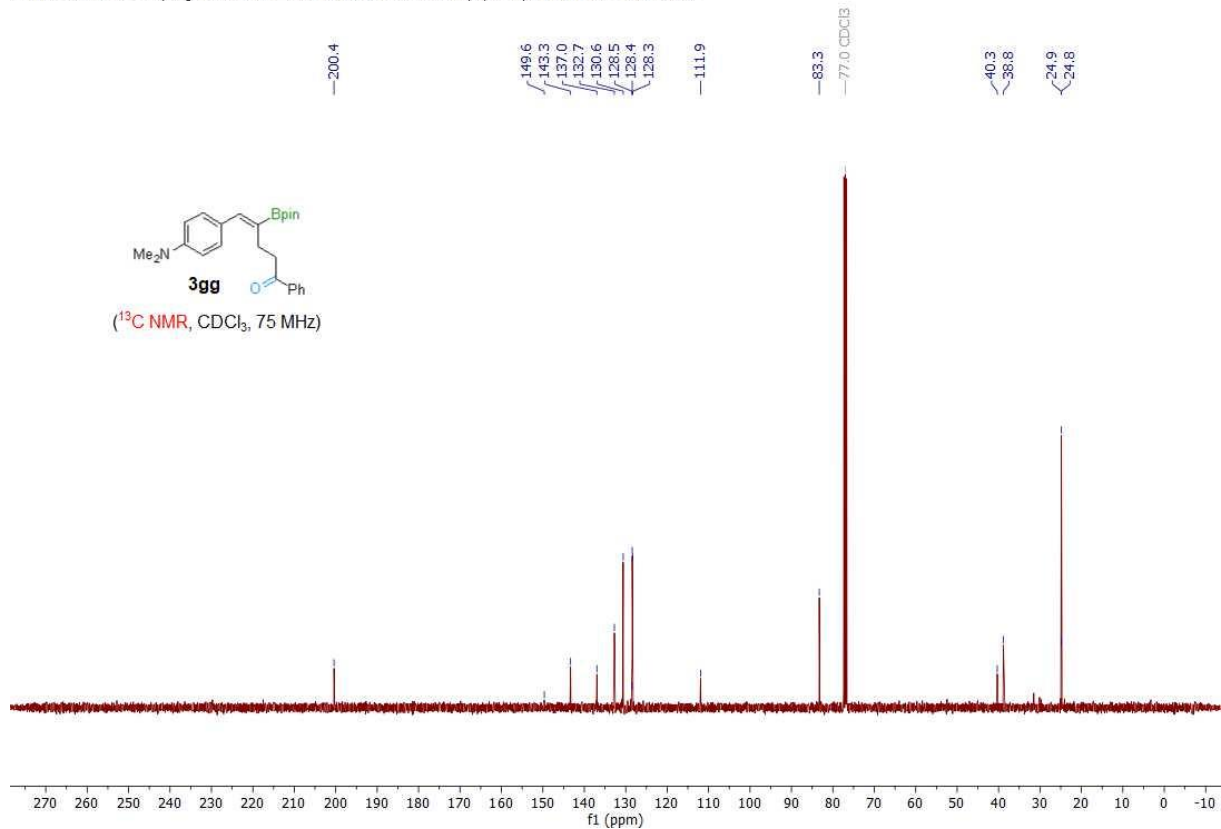

—30.6

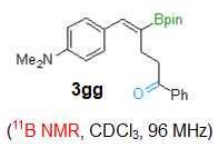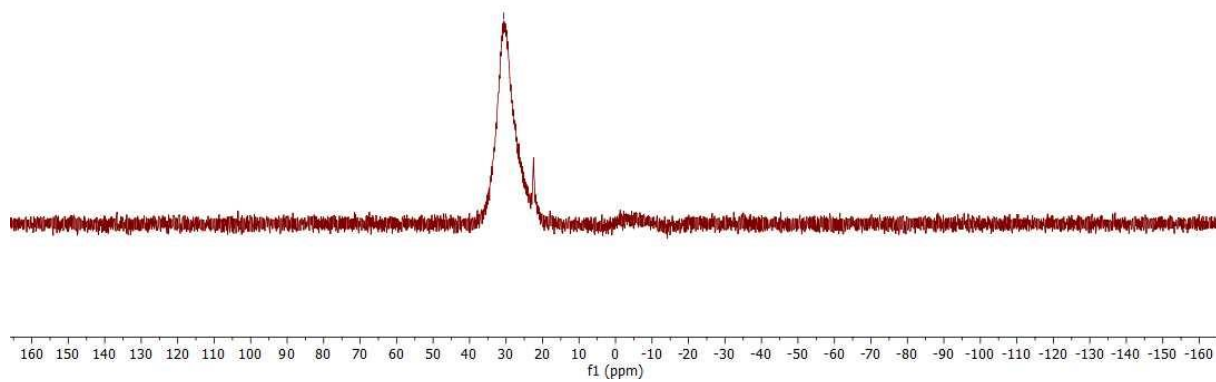

211101.331.10.fid — Fupeng Wu Ub-34 — Au1H CDCl3 {C:\Bruker\TopSpin3.6.2} 2111 31 — 300.13MHz

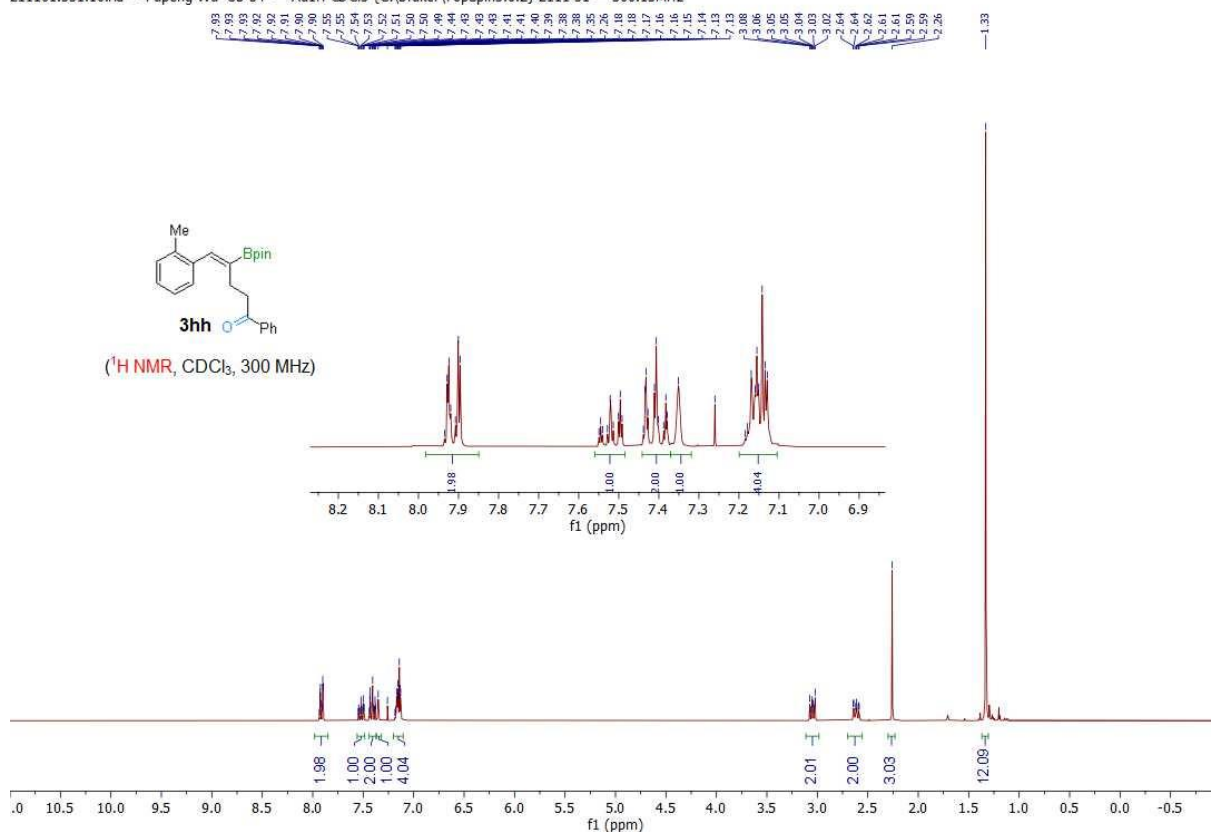

211101.331.11.fid — Fupeng Wu Ub-34 — Au13C CDCl3 {C:\Bruker\TopSpin3.6.2} 2111 31 — 75.48MHz

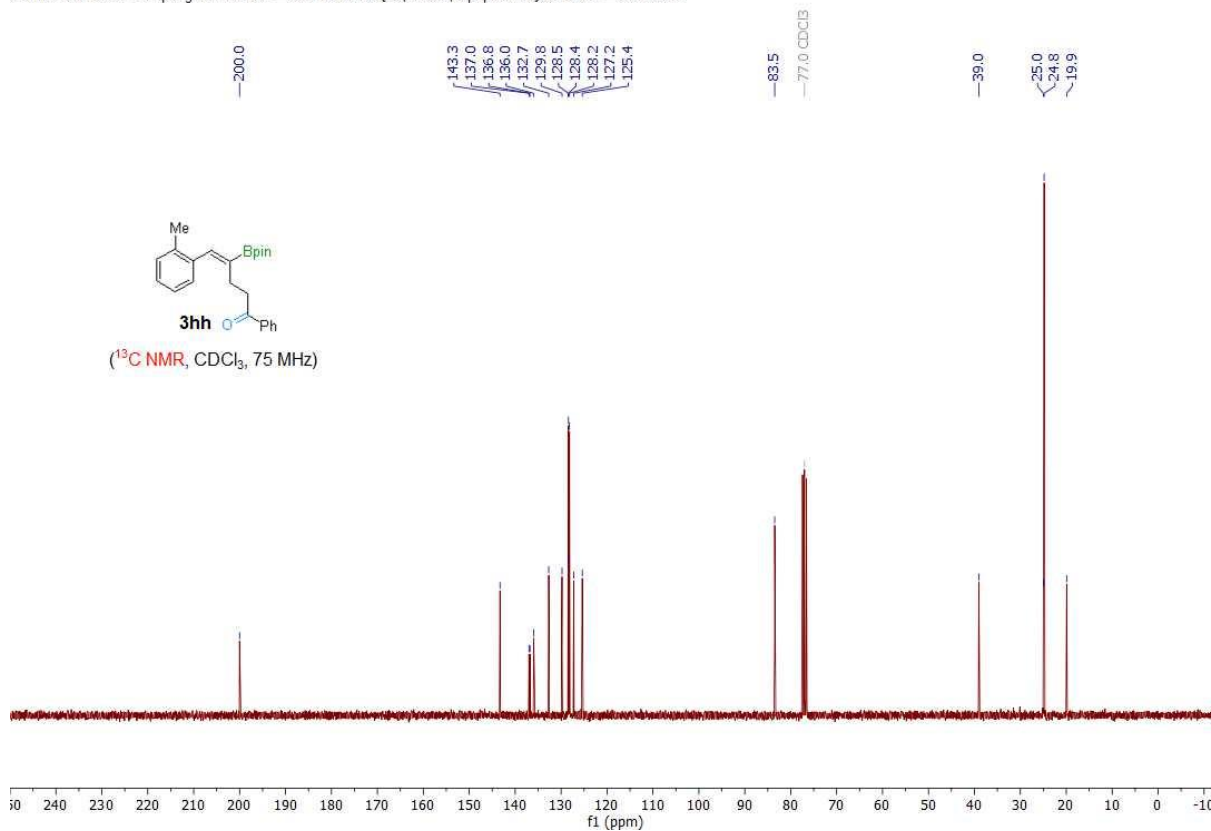

—30.3

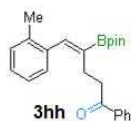

**3hh**

(<sup>11</sup>B NMR, CDCl<sub>3</sub>, 96 MHz)

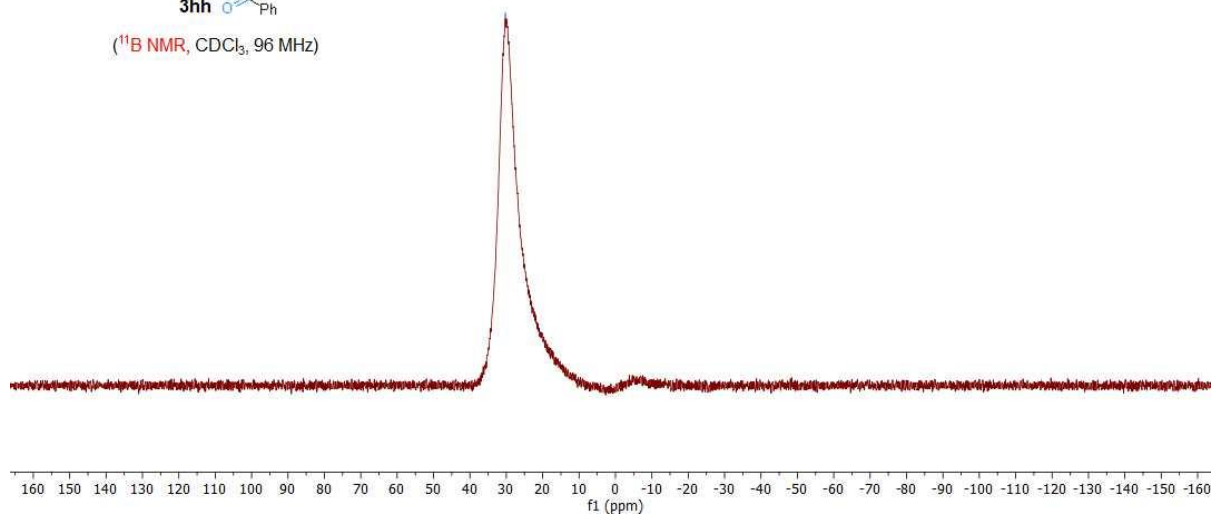

211101.329.10.fid — Fupeng Wu Ub-40 — Au1H CDCl3 {C:\Bruker\TopSpin3.6.2} 2111 29 — 300.13MHz

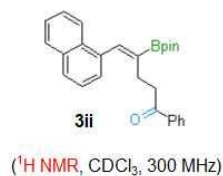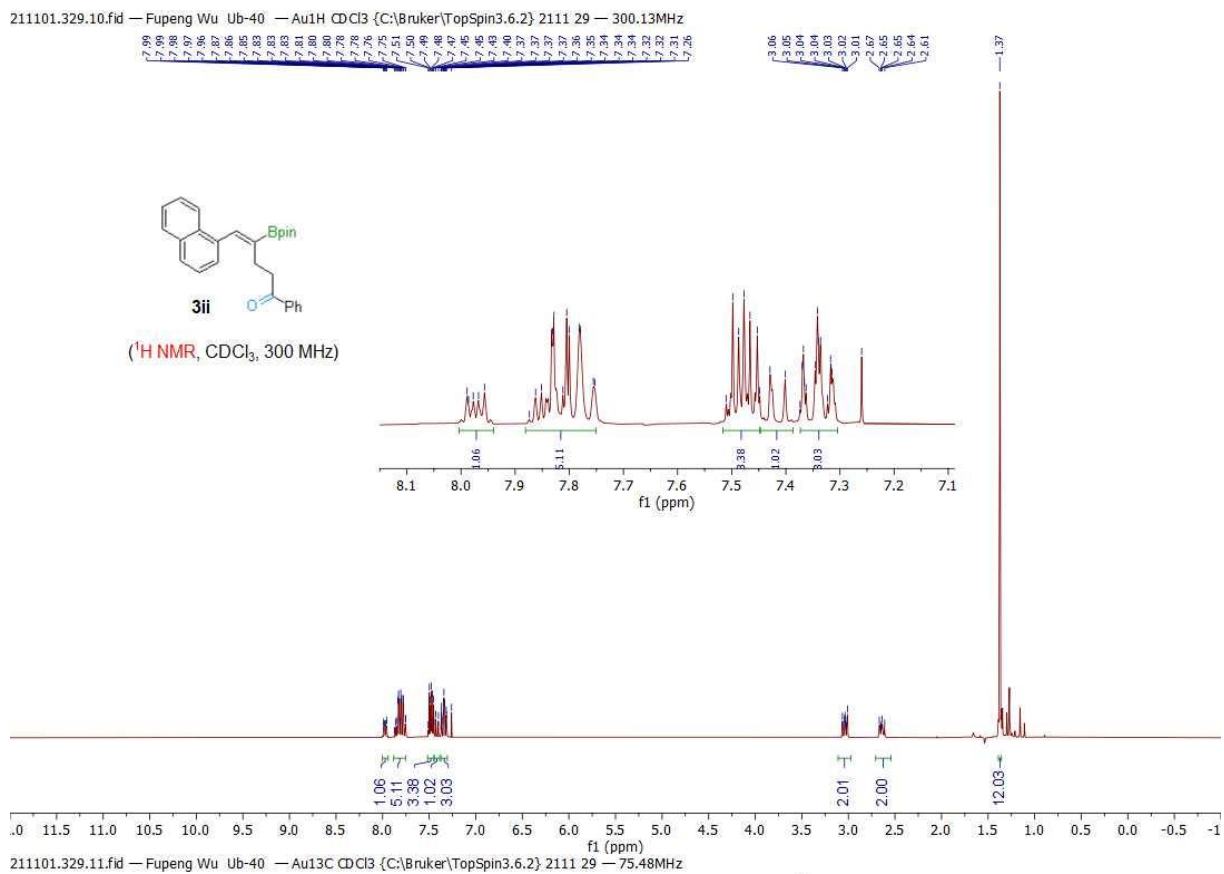

211101.329.11.fid — Fupeng Wu Ub-40 — Au13C CDCl3 {C:\Bruker\TopSpin3.6.2} 2111 29 — 75.48MHz

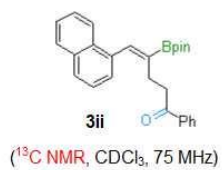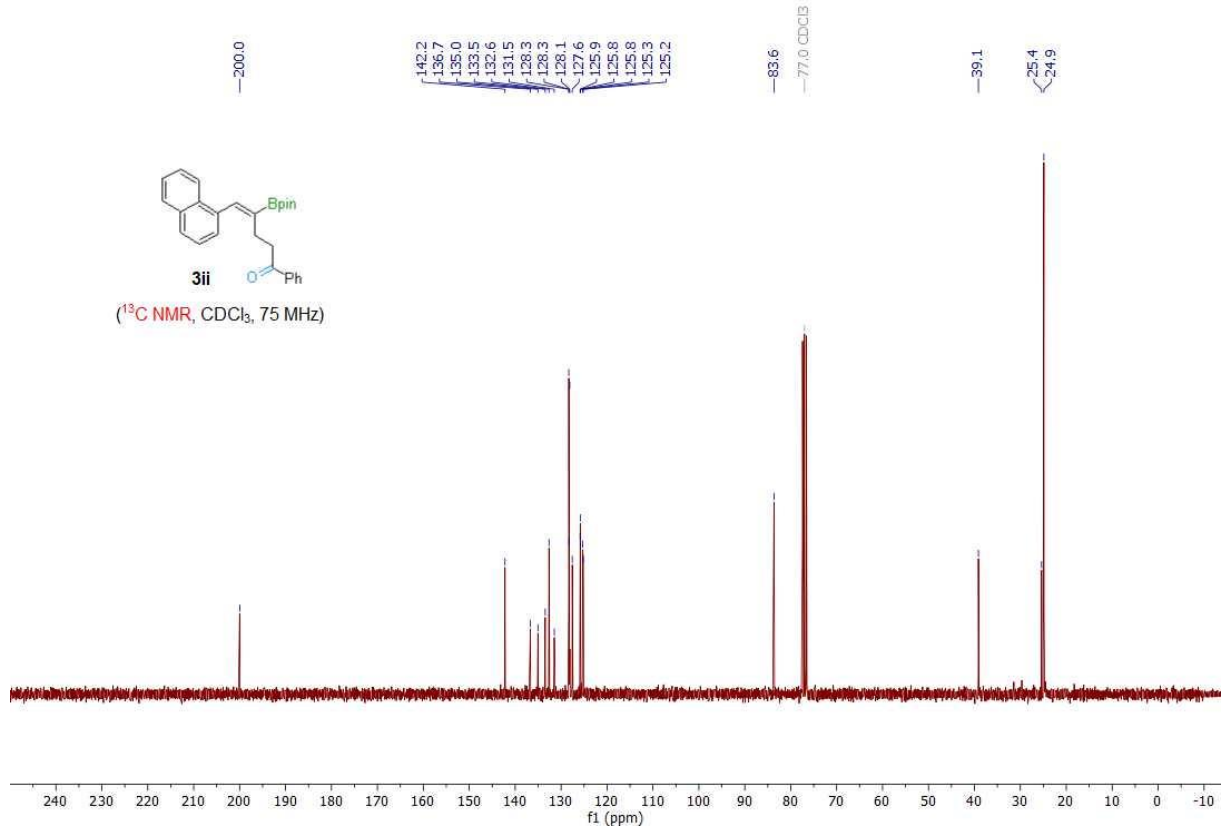



— 29.9

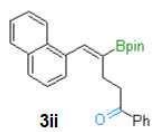

(<sup>11</sup>B NMR, CDCl<sub>3</sub>, 96 MHz)

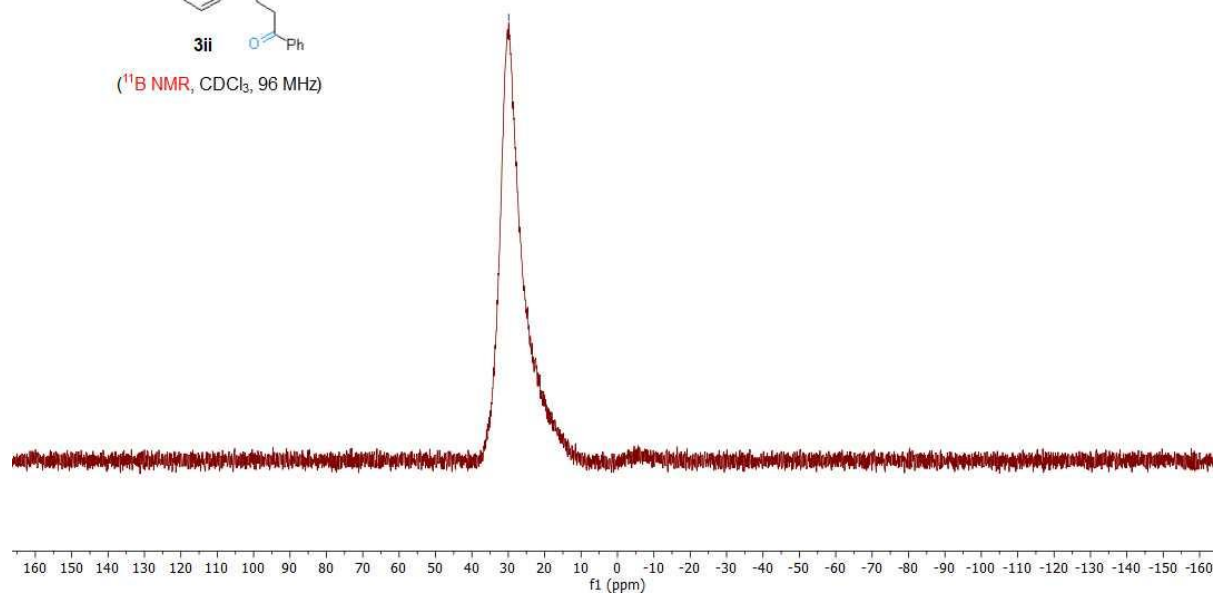

211111.306.10.fid — Fupeng Wu Ub-47 — Au1H CDCl3 {C:\Bruker\TopSpin3.6.2} 2111 6 — 300.13MHz

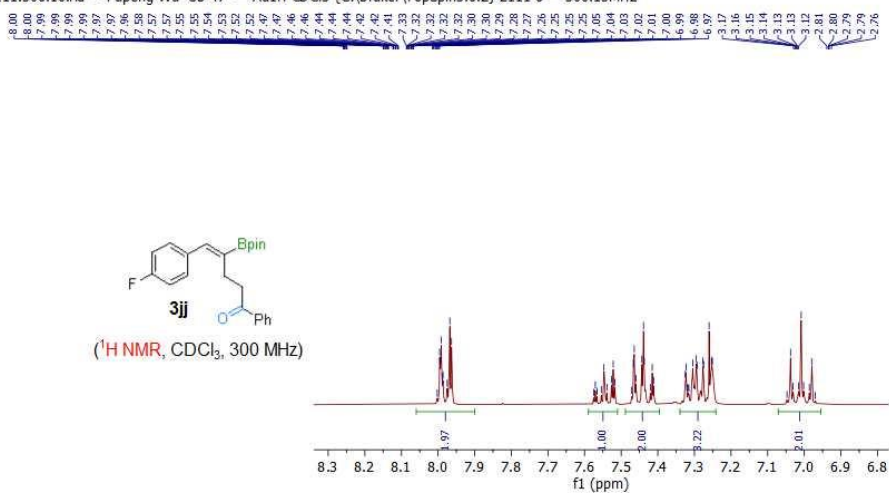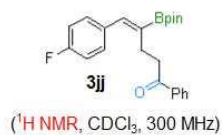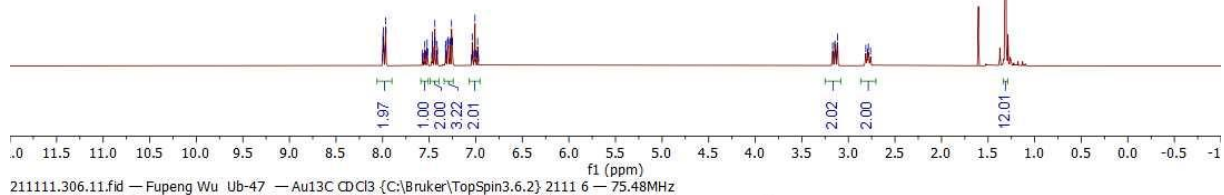

211111.306.11.fid — Fupeng Wu Ub-47 — Au13C CDCl3 {C:\Bruker\TopSpin3.6.2} 2111 6 — 75.48MHz

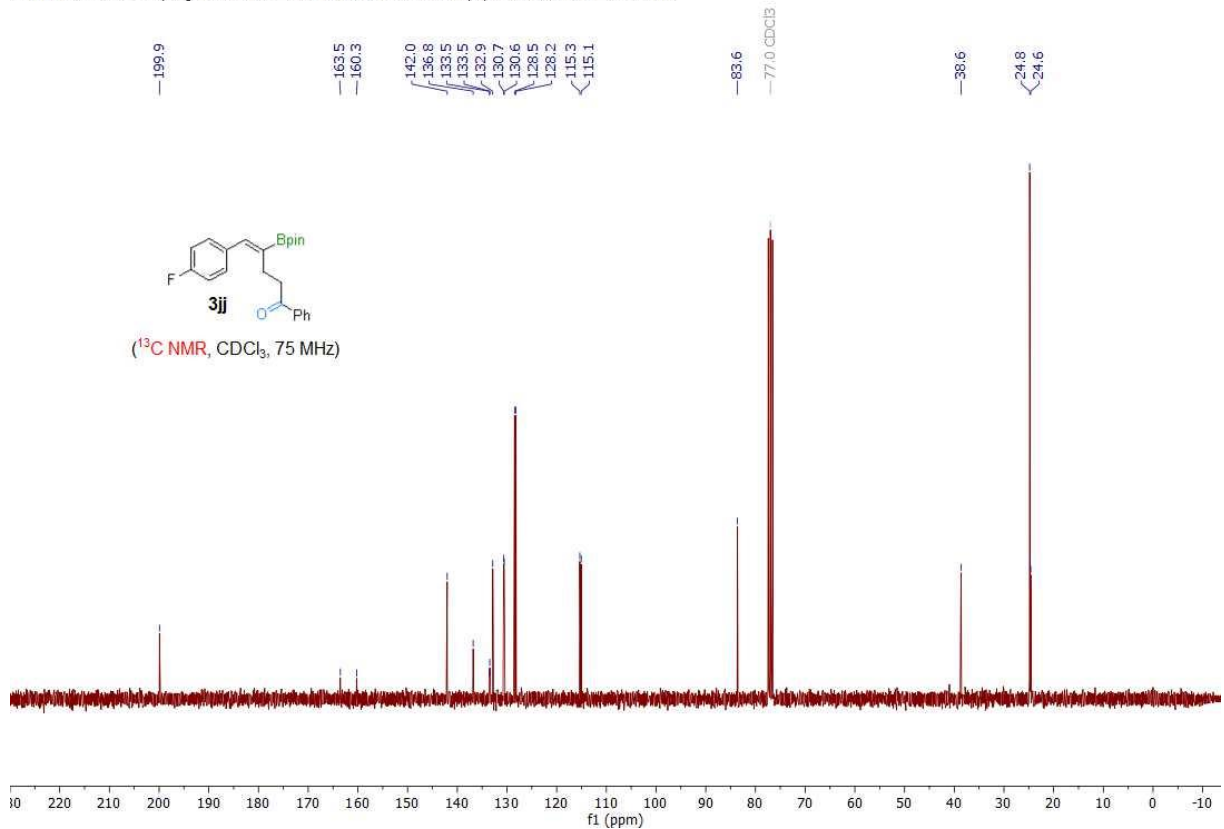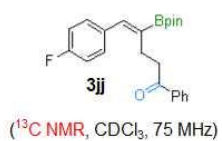

—30.5

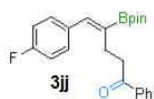

(<sup>11</sup>B NMR, CDCl<sub>3</sub>, 128 MHz)

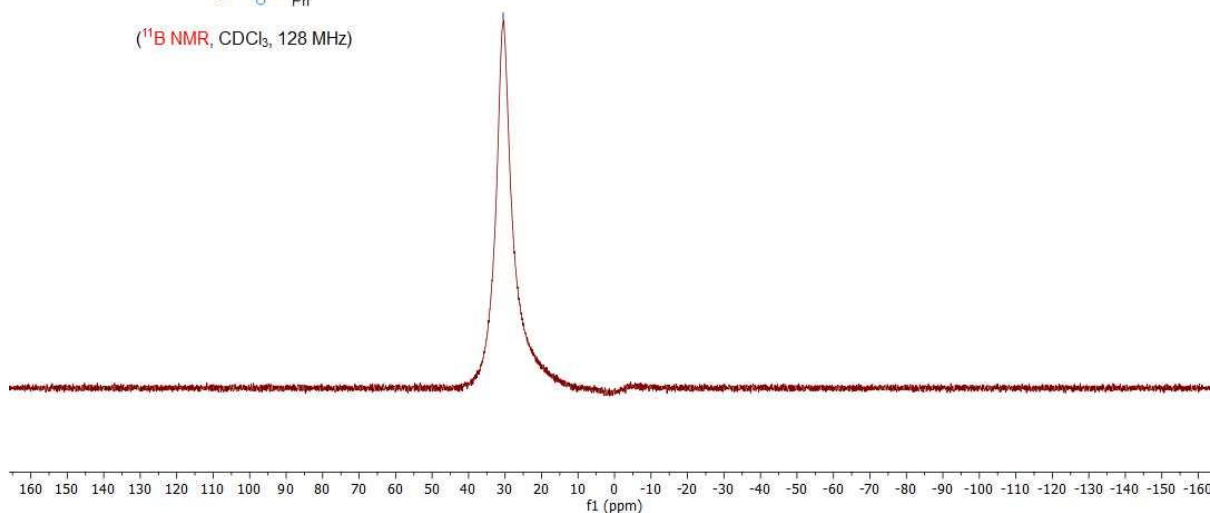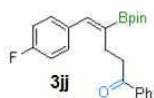

(<sup>19</sup>F NMR, CDCl<sub>3</sub>, 282 MHz)

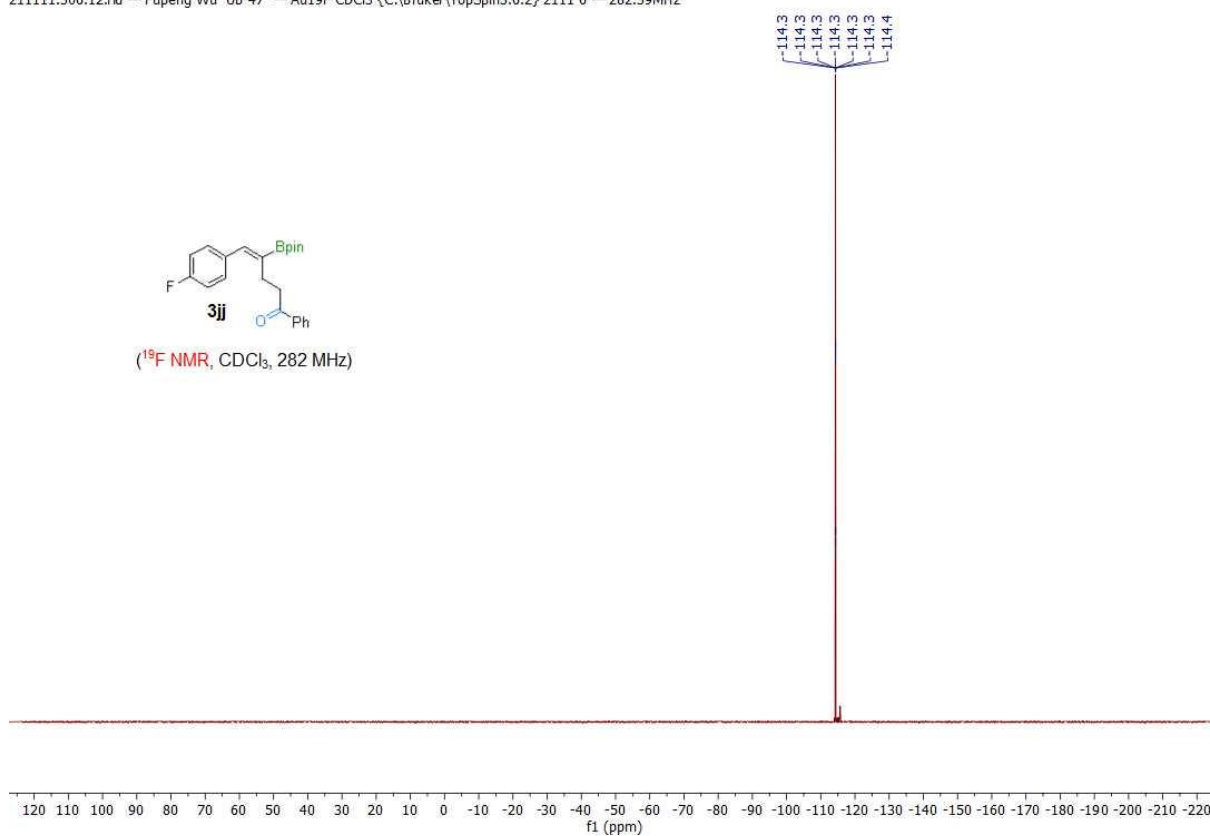

211101.334.10.fid — Fupeng Wu Ub-35 — Au1H CDCl3 {C:\Bruker\TopSpin3.6.2} 2111 34 — 300.13MHz

7.80 7.79 7.79 7.79 7.77 7.76 7.57 7.37 7.36 7.35 7.34 7.34 7.33 7.32 7.27 7.26 7.26 7.24 7.24 7.23 7.22 7.22 7.21 7.12 7.10 7.10 7.02 7.02 7.00 7.06 7.05 7.05 6.91 6.91 6.91 6.89 6.89 6.88 6.88 6.88 6.83 6.83 6.81 6.80 6.80 6.79 6.79 6.77 6.76 6.76 6.76 6.74 6.74 6.74 6.73 6.73 6.71 6.71 6.70 6.70 6.66 6.66 6.66 2.94 2.94 2.92 2.92 2.83 2.83 2.81 2.81 1.12 1.12

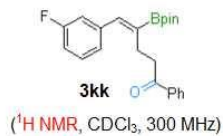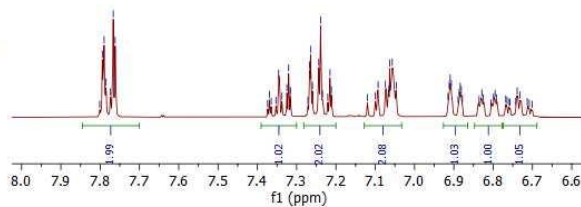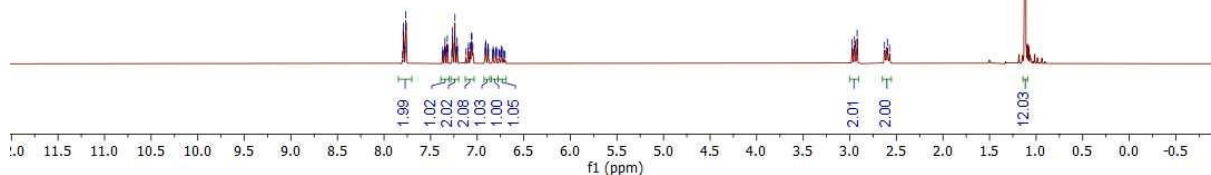

211101.334.11.fid — Fupeng Wu Ub-35 — Au13C CDCl3 {C:\Bruker\TopSpin3.6.2} 2111 34 — 75.48MHz

199.8 164.3 161.0 141.8 141.8 139.7 139.6 136.8 132.8 129.7 129.6 128.5 128.2 128.1 124.5 124.5 115.7 115.4 114.3 114.0 83.7 77.0 CDCl3 38.6 24.8 24.7

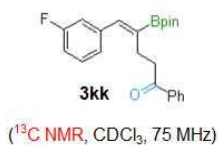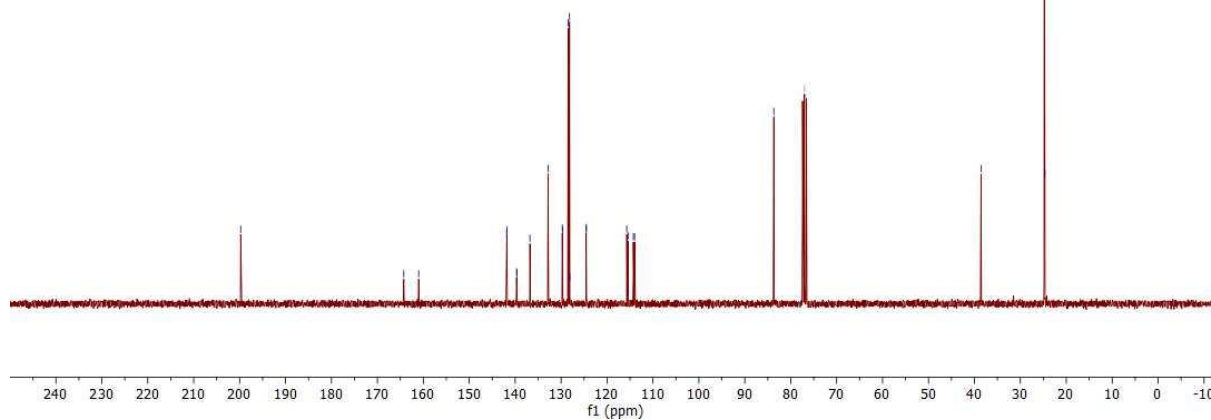

— 30.0

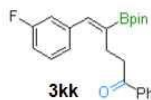

(<sup>11</sup>B NMR, CDCl<sub>3</sub>, 96 MHz)

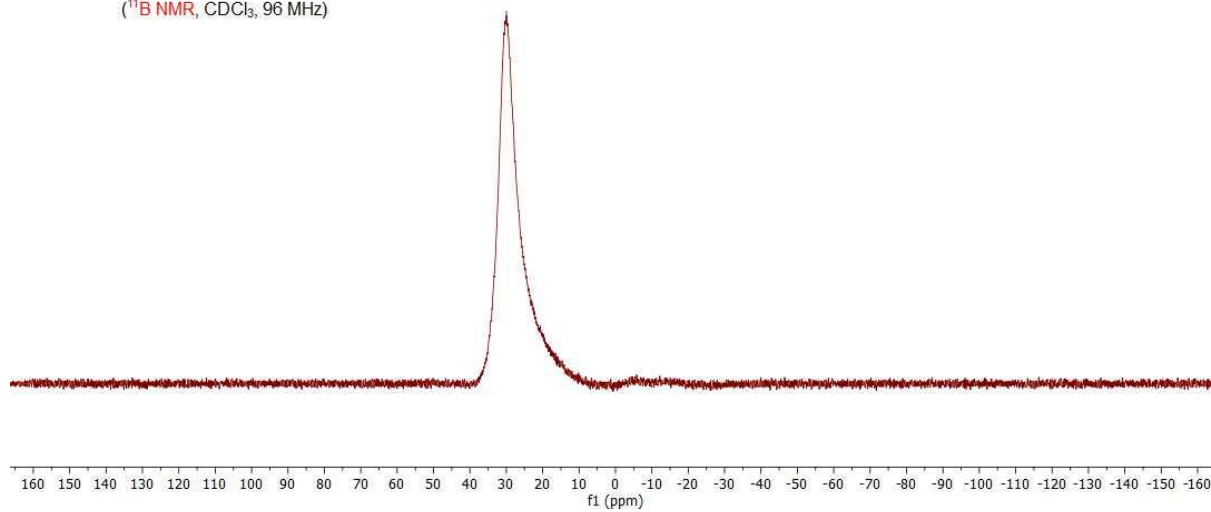

211105.433.10.fid — Fupeng Wu Ub-41 — Au1H CDCl3 {C:\Bruker\TopSpin3.5pl6} 2111 33 — 400.13MHz

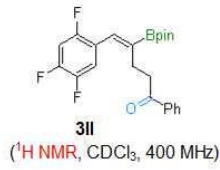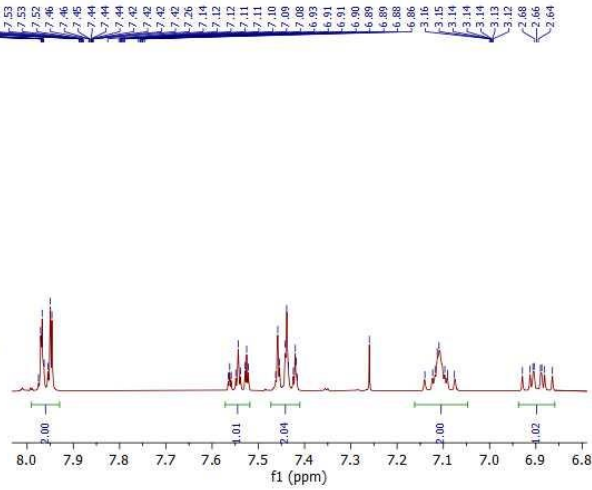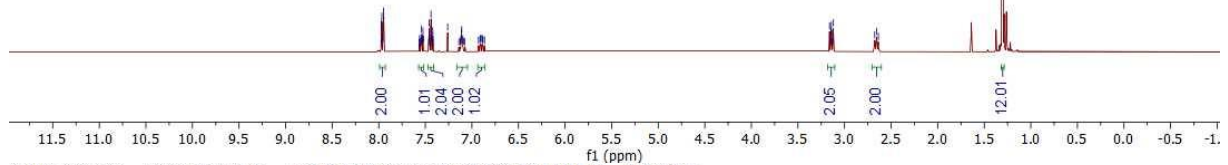

211105.433.11.fid — Fupeng Wu Ub-41 — Au13C CDCl3 {C:\Bruker\TopSpin3.5pl6} 2111 33 — 100.63MHz

199.7, 156.3, 156.2, 156.2, 156.1, 152.8, 152.8, 153.7, 153.7, 150.6, 150.6, 150.5, 150.5, 150.4, 148.1, 148.0, 148.0, 147.9, 147.7, 147.7, 147.6, 147.5, 147.5, 145.3, 145.2, 145.2, 145.1, 145.1, 136.8, 133.8, 132.9, 128.5, 128.1, 121.6, 121.6, 121.6, 121.5, 121.4, 121.4, 121.4, 121.4, 121.3, 118.0, 117.9, 117.8, 117.8, 105.8, 105.6, 105.5, 105.5, 105.3, 83.9, 38.1, 25.2, 24.8

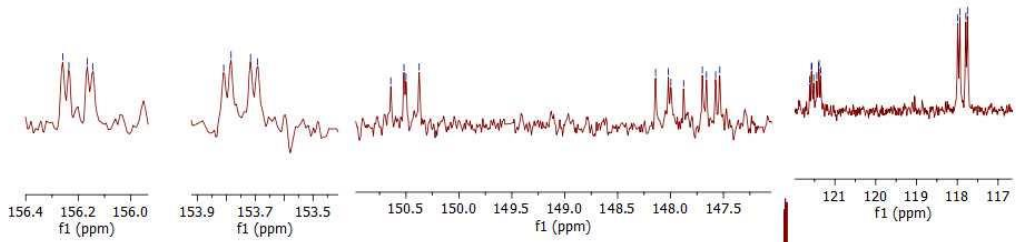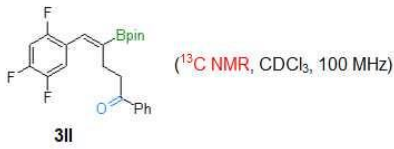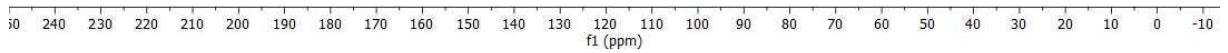

—30.5

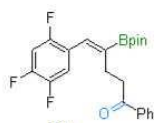

**3II**  
(<sup>11</sup>B NMR, CDCl<sub>3</sub>, 128 MHz)

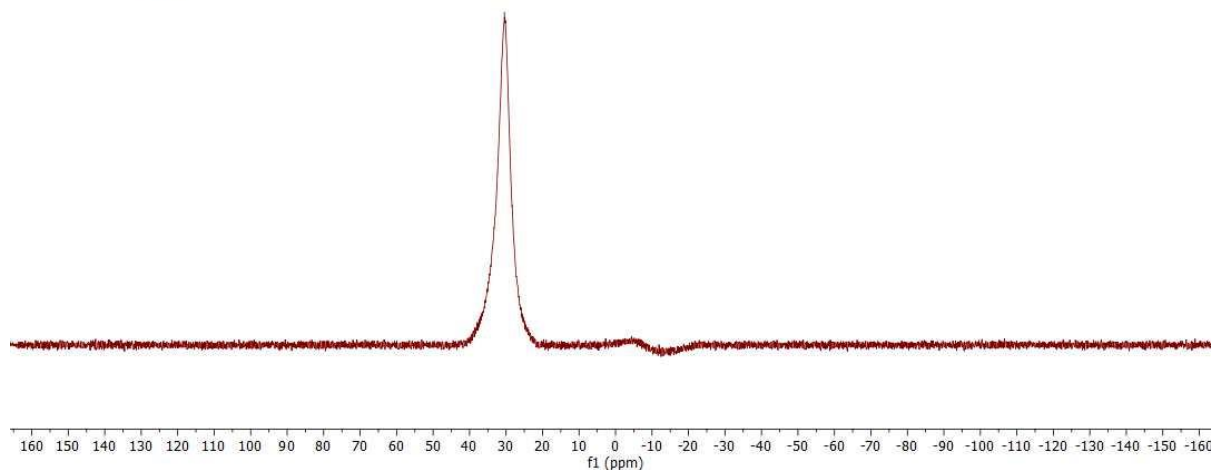

115.1  
115.1  
115.2  
115.2  
115.2  
134.2  
134.2  
134.2  
134.2  
134.2  
134.3  
134.3  
134.3  
142.7  
142.8  
142.8  
142.8  
142.8  
142.8  
142.8  
142.8  
142.9

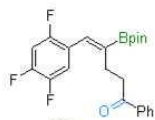

**3II**  
(<sup>19</sup>F NMR, CDCl<sub>3</sub>, 376 MHz)

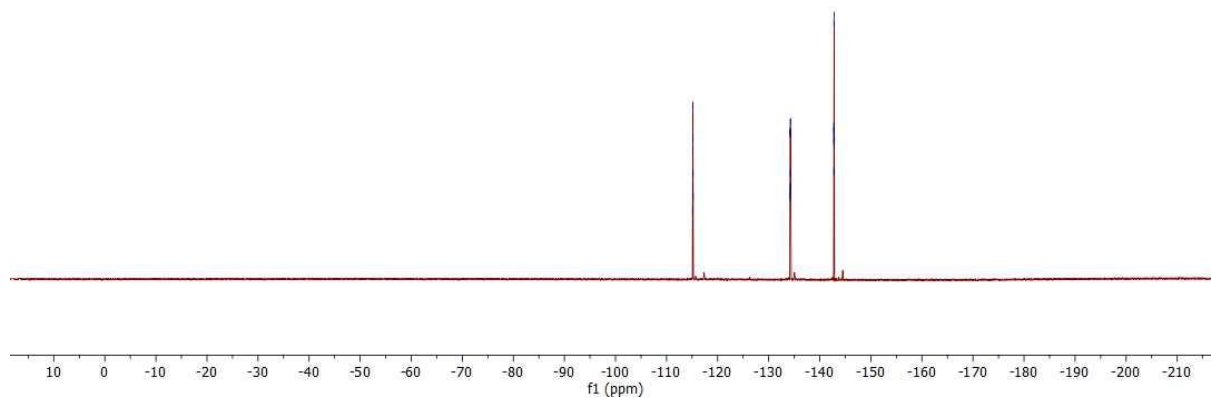

211129.445.10.fid — Fupeng Wu Ub-57 — Au1H CDCl3 {C:\Bruker\TopSpin3.5pl6} 2111 45 — 400.13MHz

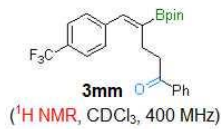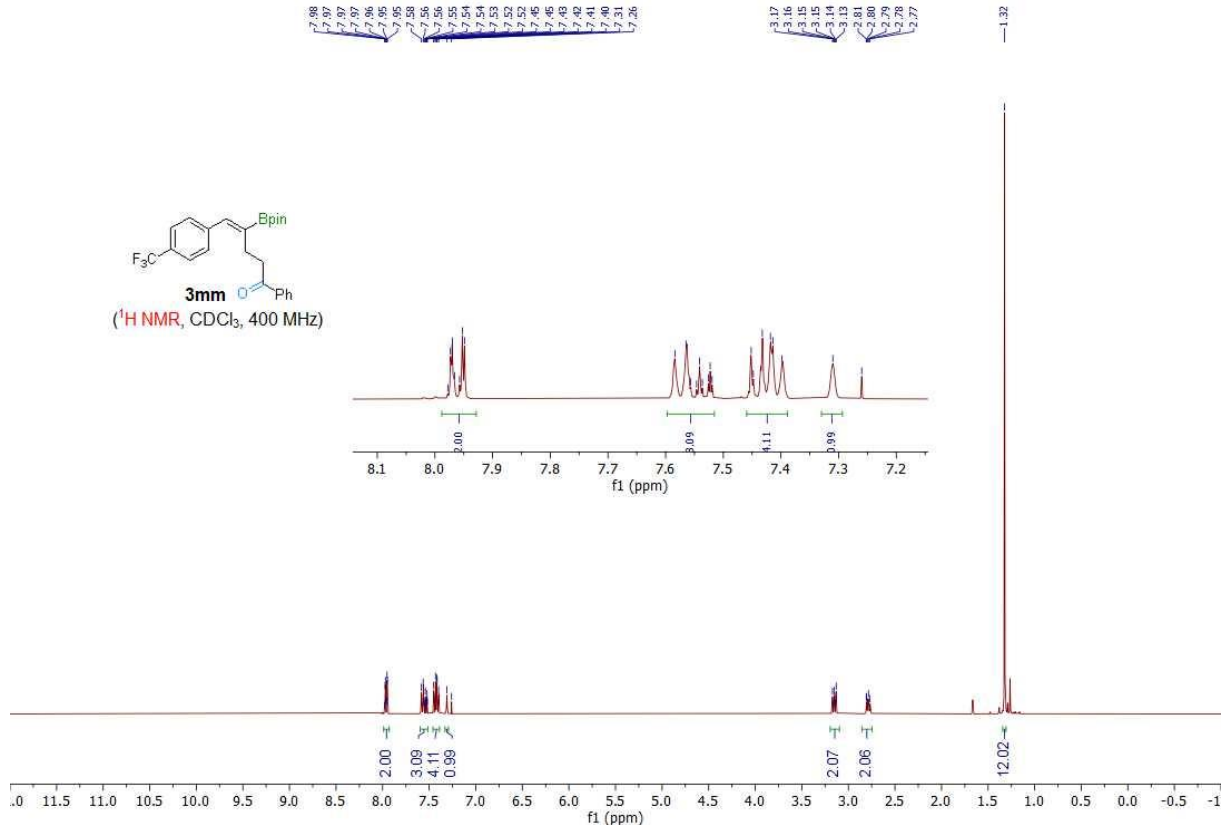

211129.445.12.fid — Fupeng Wu Ub-57 — Au13C CDCl3 {C:\Bruker\TopSpin3.5pl6} 2111 45 — 100.63MHz

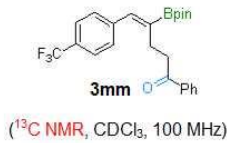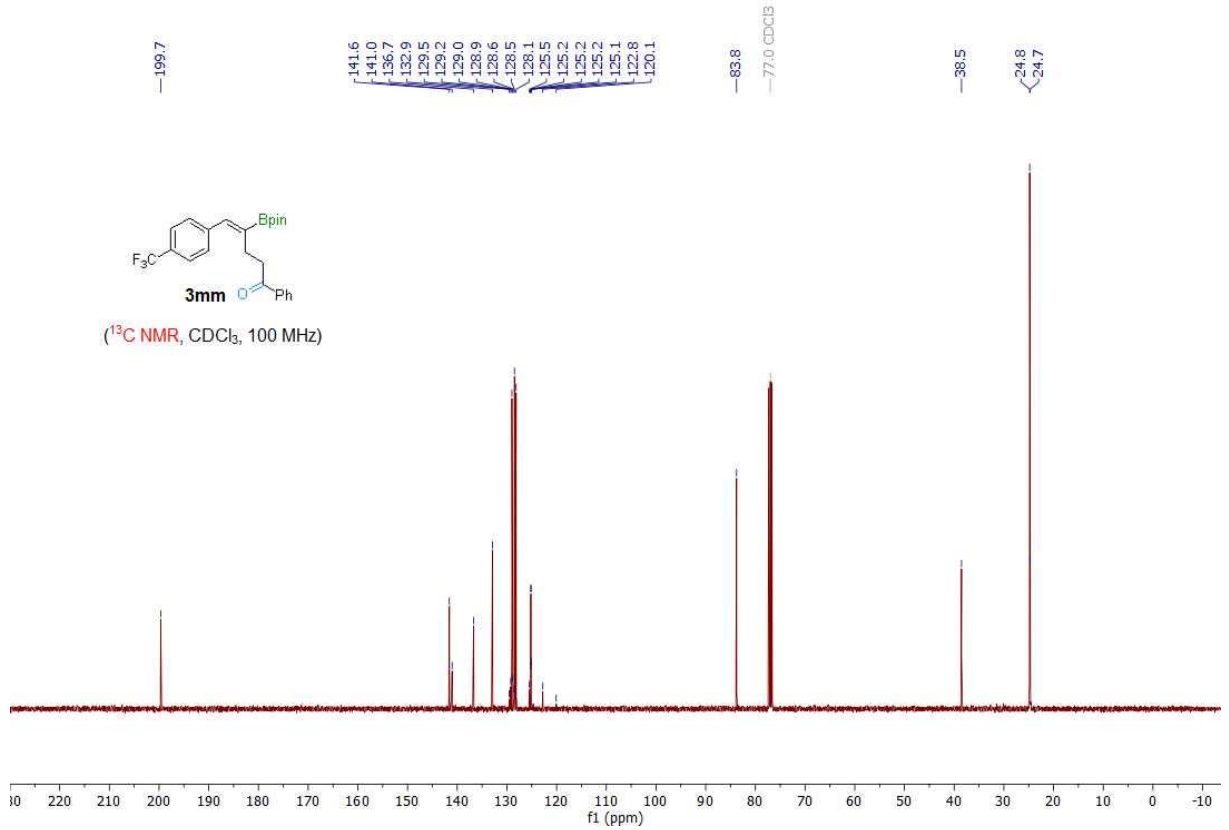



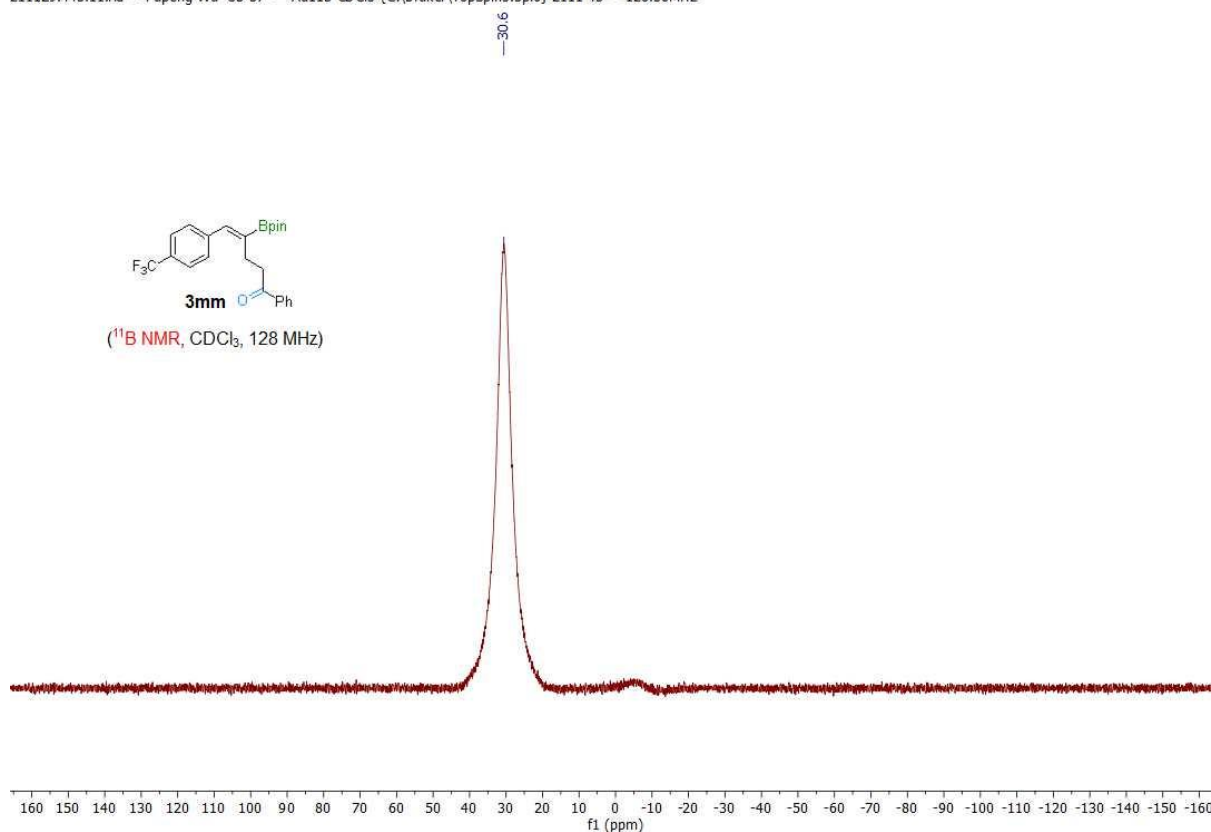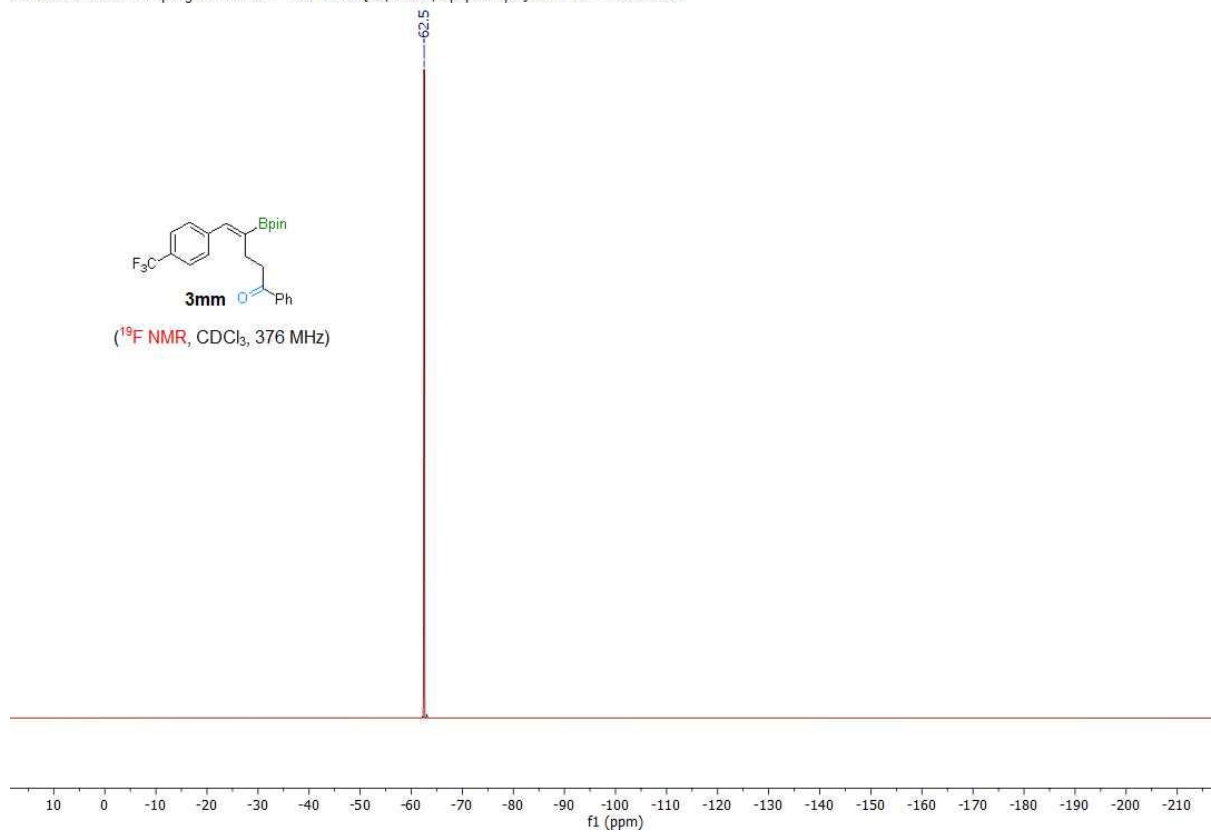

211129.447.10.fid — Fupeng Wu Ub-58 — Au1H CDCl3 {C:\Bruker\TopSpin3.5pl6} 2111 47 — 400.13MHz

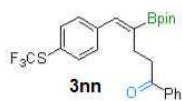

(<sup>1</sup>H NMR, CDCl<sub>3</sub>, 400 MHz)

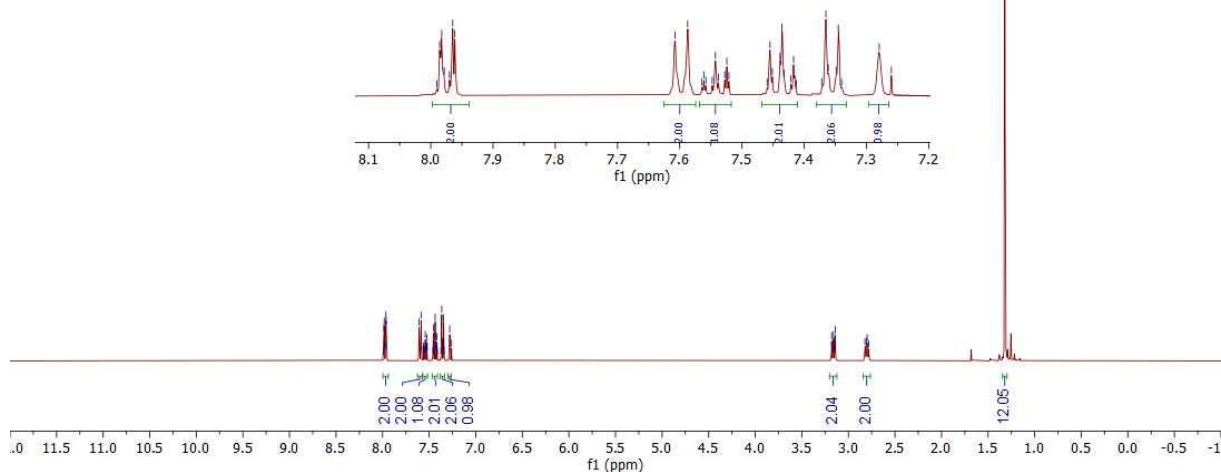

211129.447.12.fid — Fupeng Wu Ub-58 — Au13C CDCl3 {C:\Bruker\TopSpin3.5pl6} 2111 47 — 100.63MHz

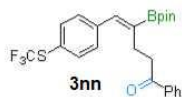

(<sup>13</sup>C NMR, CDCl<sub>3</sub>, 100 MHz)

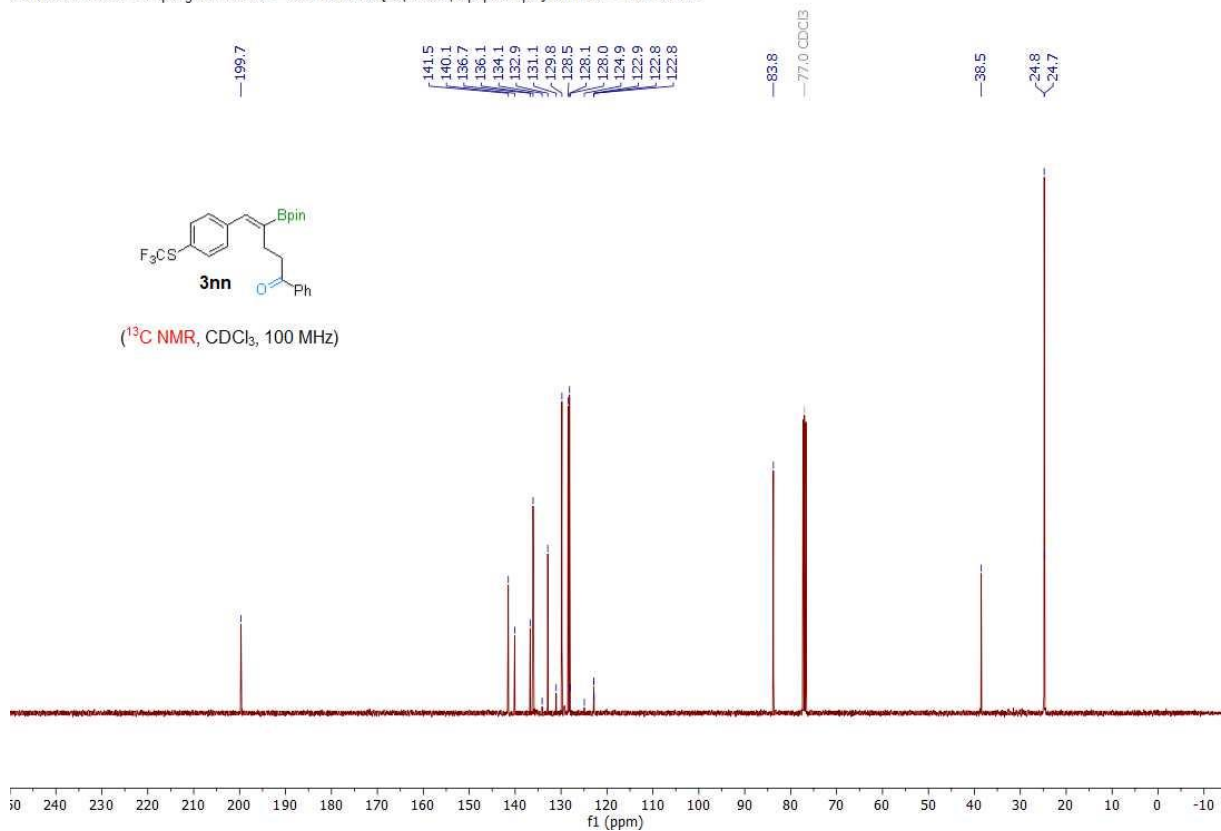

30.8

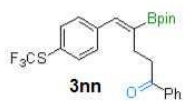

(<sup>11</sup>B NMR, CDCl<sub>3</sub>, 128 MHz)

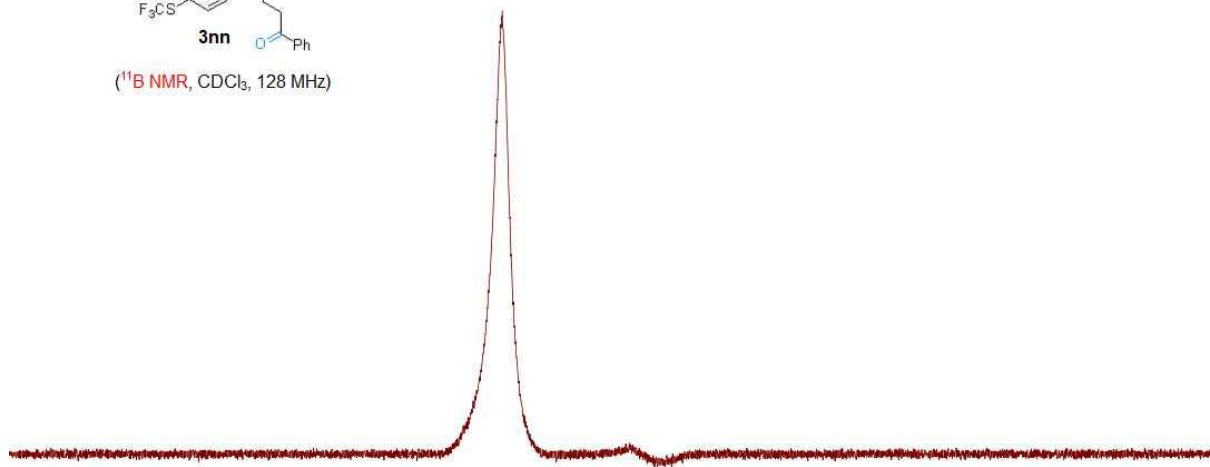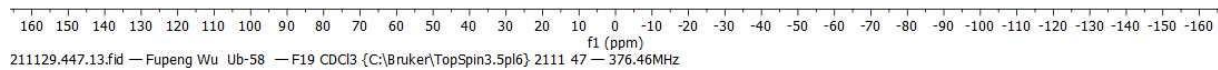

0.0

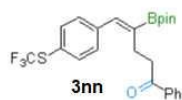

(<sup>19</sup>F NMR, CDCl<sub>3</sub>, 376 MHz)

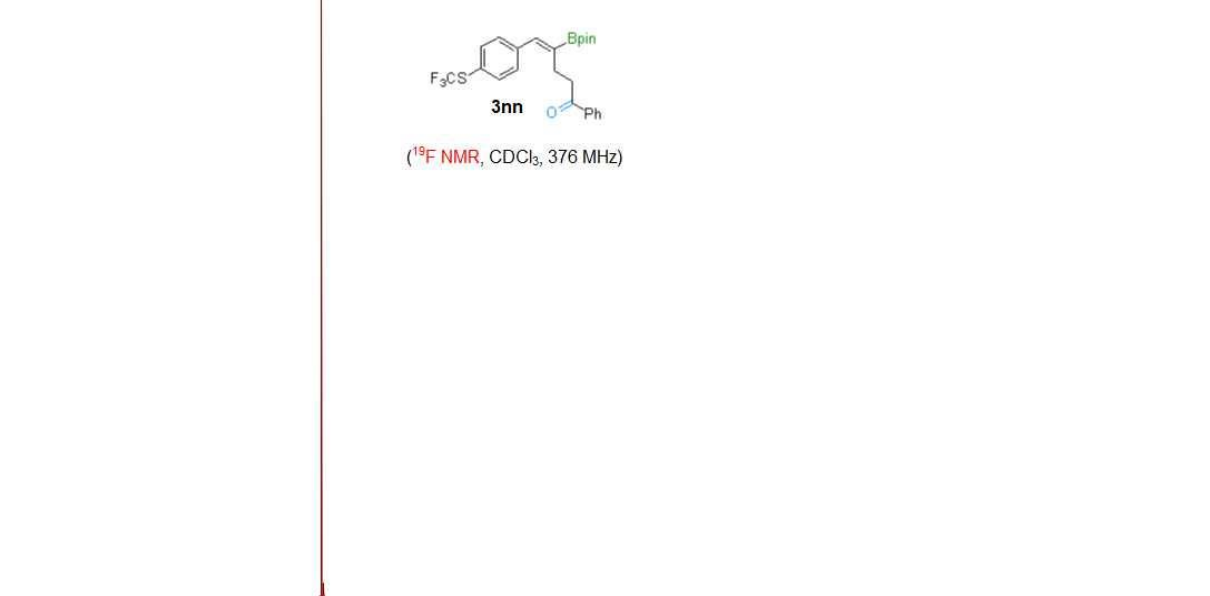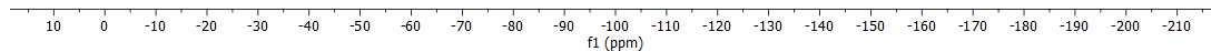

211015.327.10.fid — Fupeng Wu Ub-8 — Au1H CDCl3 {C:\Bruker\TopSpin3.6.2} 2110 27 — 300.13MHz

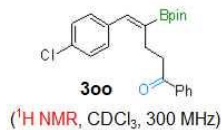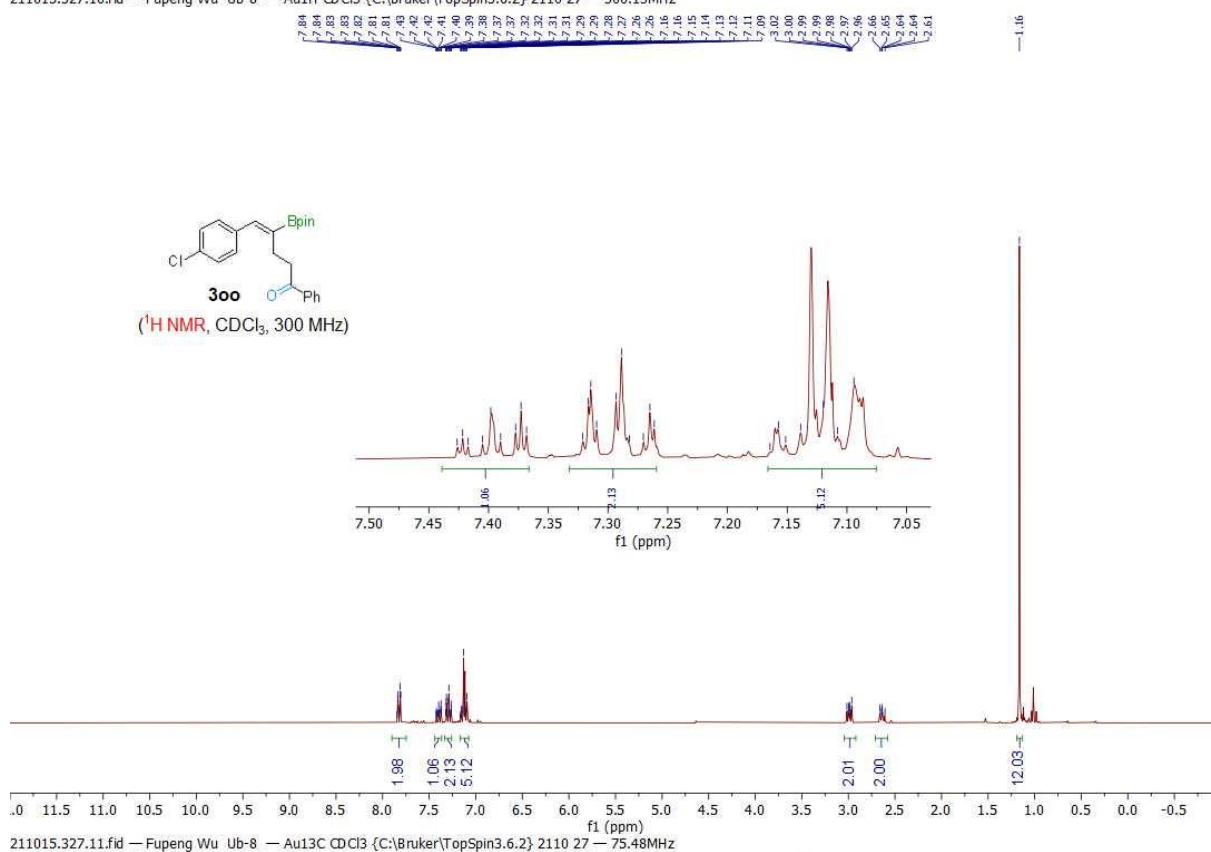

211015.327.11.fid — Fupeng Wu Ub-8 — Au13C CDCl3 {C:\Bruker\TopSpin3.6.2} 2110 27 — 75.48MHz

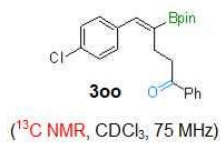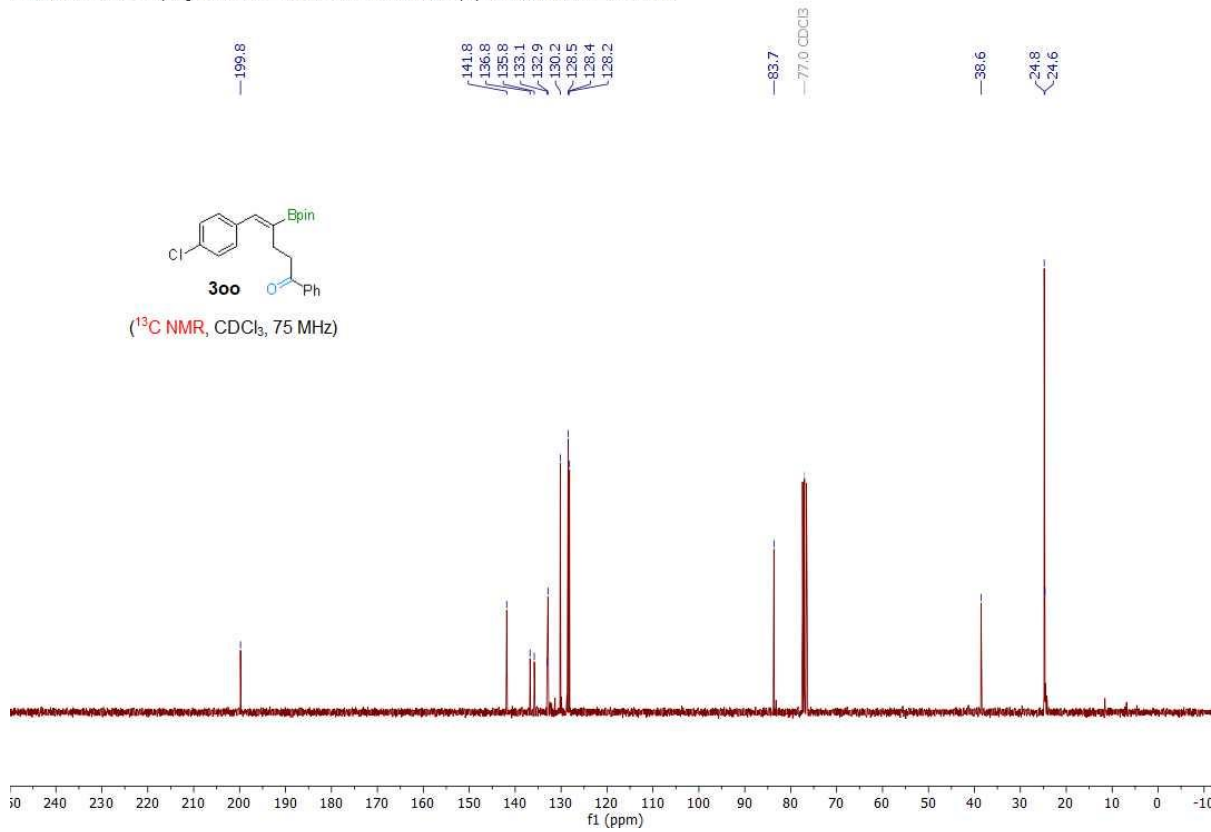

—30.2

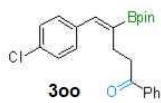

(<sup>11</sup>B NMR, CDCl<sub>3</sub>, 96 MHz)

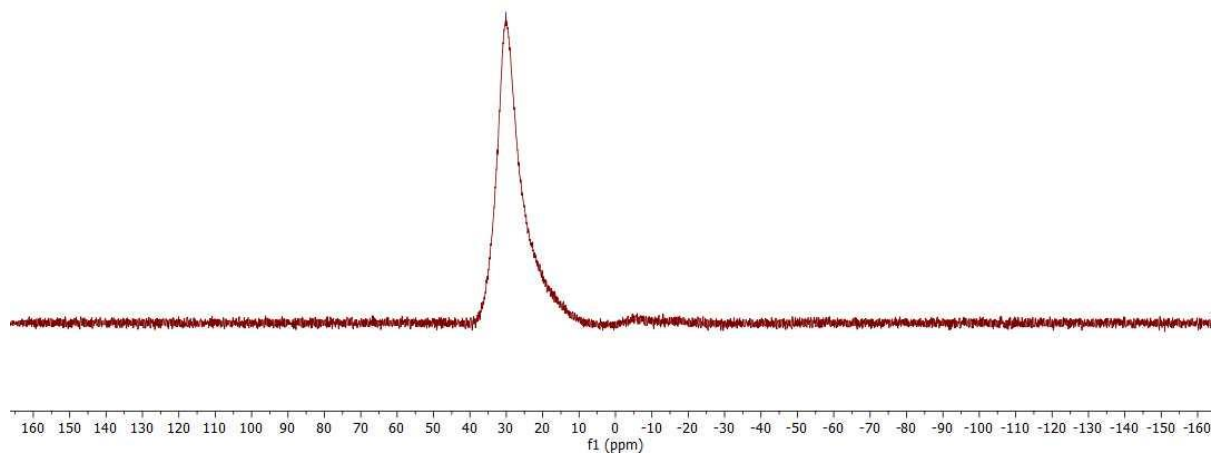

211103.309.10.fid — Fupeng Wu Ub-38 — Au1H CDCl3 {C:\Bruker\TopSpin3.6.2} 2111 9 — 300.13MHz

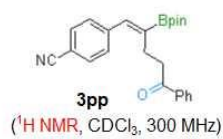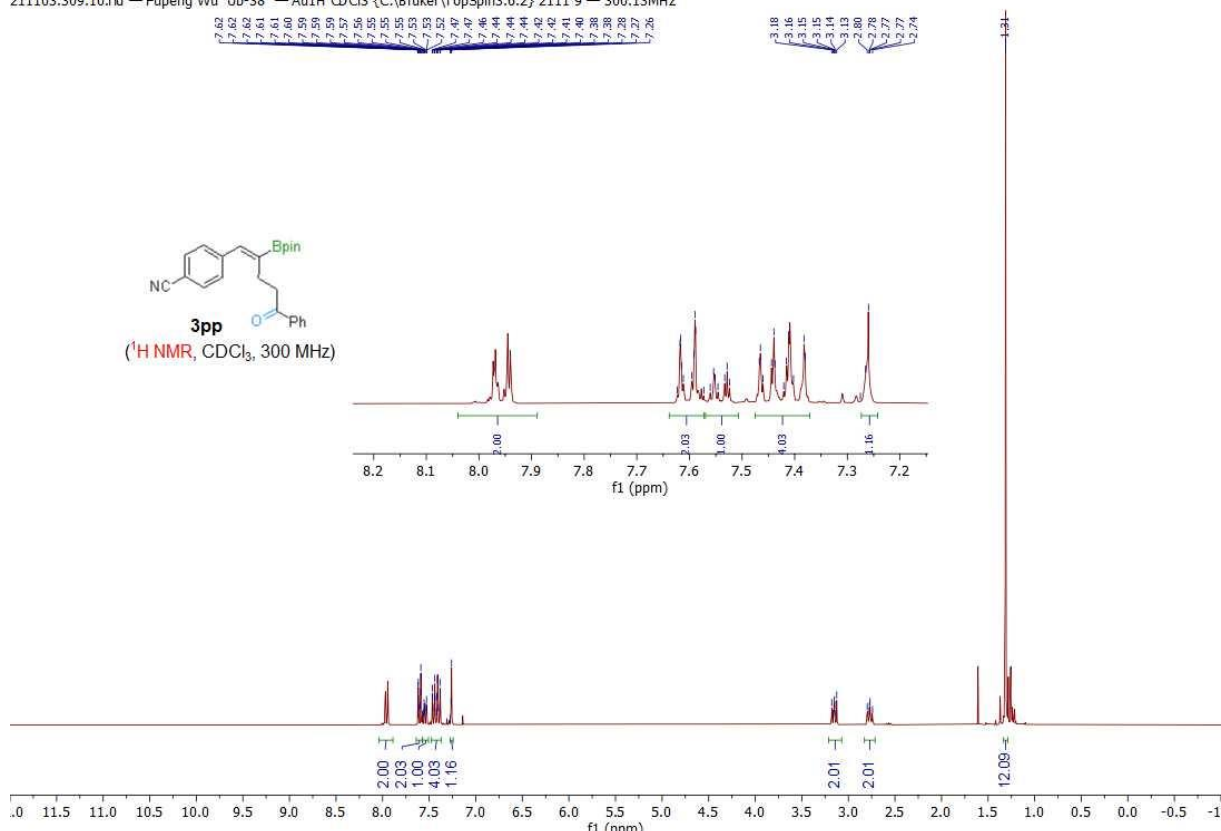

211103.309.11.fid — Fupeng Wu Ub-38 — Au13C CDCl3 {C:\Bruker\TopSpin3.6.2} 2111 9 — 75.48MHz

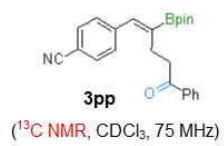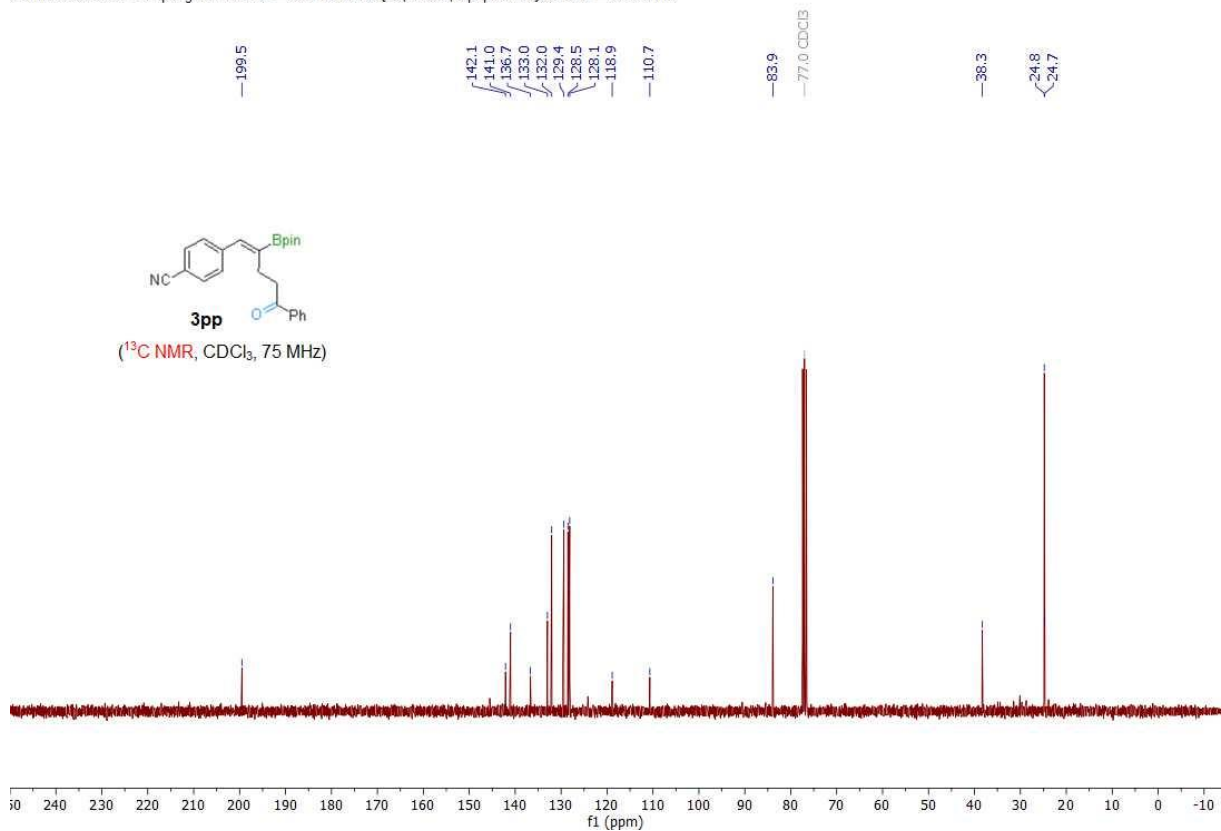

30.0

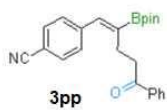

(<sup>1</sup>B NMR, CDCl<sub>3</sub>, 96 MHz)

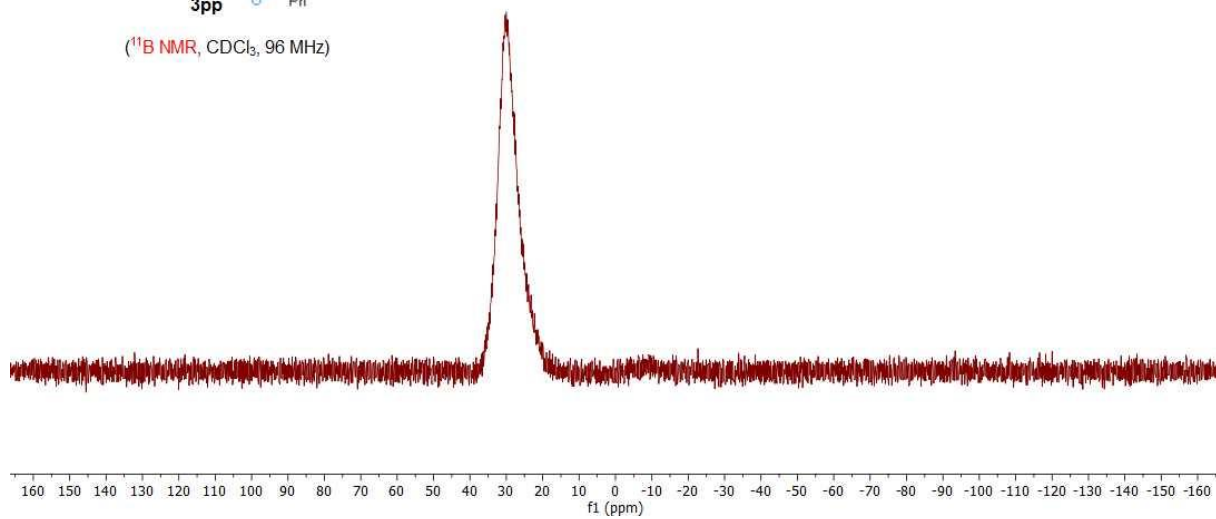

211109.421.10.fid — Fupeng Wu Ub-49 — Au1H CDCl3 {C:\Bruker\TopSpin3.5pl6} 2111 21 — 400.13MHz

7.98  
7.96  
7.94  
7.92  
7.90  
7.88  
7.87  
7.86  
7.85  
7.84  
7.83  
7.82  
7.81  
7.80  
7.79  
7.78  
7.77  
7.76  
7.75  
7.74  
7.73  
7.72  
7.71  
7.70  
7.69  
7.68  
7.67  
7.66  
7.65  
7.64  
7.63  
7.62  
7.61  
7.60  
7.59  
7.58  
7.57  
7.56  
7.55  
7.54  
7.53  
7.52  
7.51  
7.50  
7.49  
7.48  
7.47  
7.46  
7.45  
7.44  
7.43  
7.42  
7.41  
7.40  
7.39  
7.38  
7.37  
7.36  
7.35  
7.34  
7.33  
7.32  
7.31  
7.30  
7.29  
7.28  
7.27  
7.26

3.20  
3.19  
3.18  
3.17  
3.16  
3.15  
3.14  
3.13  
3.12  
3.11  
3.10  
3.09  
3.08  
3.07  
3.06  
3.05  
3.04  
3.03  
3.02  
3.01  
3.00  
2.99  
2.98  
2.97  
2.96  
2.95  
2.94  
2.93  
2.92  
2.91  
2.90  
2.89  
2.88  
2.87  
2.86

1.34

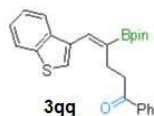

(<sup>1</sup>H NMR, CDCl<sub>3</sub>, 300 MHz)

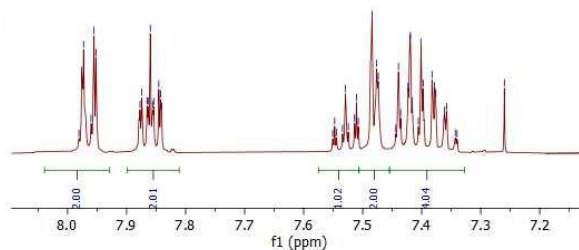

211109.421.11.fid — Fupeng Wu Ub-49 — Au13C CDCl3 {C:\Bruker\TopSpin3.5pl6} 2111 21 — 100.63MHz

200.0

139.5  
139.0  
136.8  
134.8  
132.8  
132.5  
128.4  
128.2  
124.6  
124.4  
124.1  
122.5  
122.3

83.6  
77.0 CDCl3

38.6

25.8  
24.8

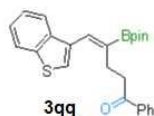

(<sup>13</sup>C NMR, CDCl<sub>3</sub>, 75 MHz)

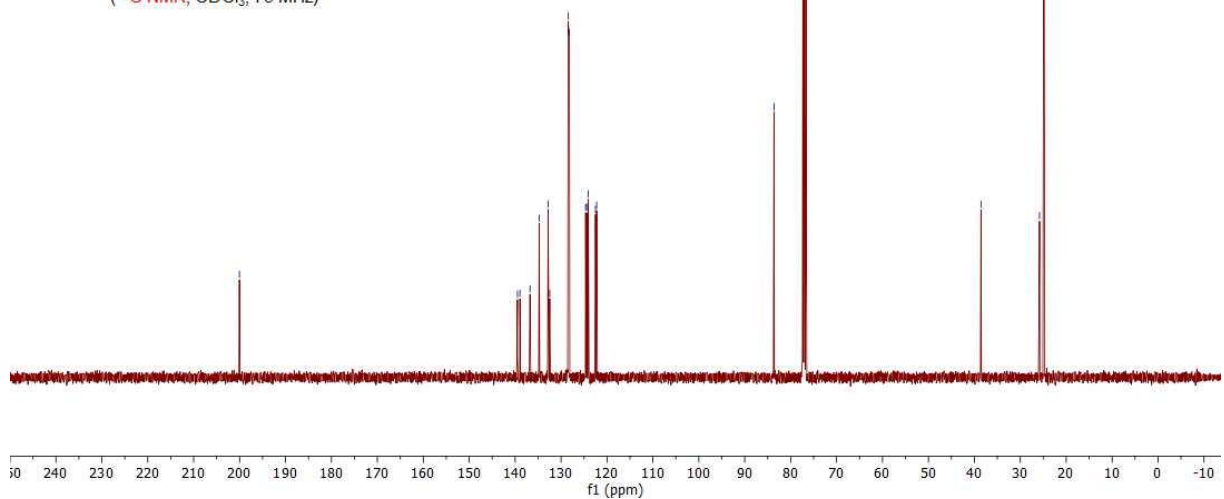



—30.9

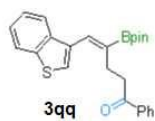

(<sup>13</sup>B NMR, CDCl<sub>3</sub>, 96 MHz)

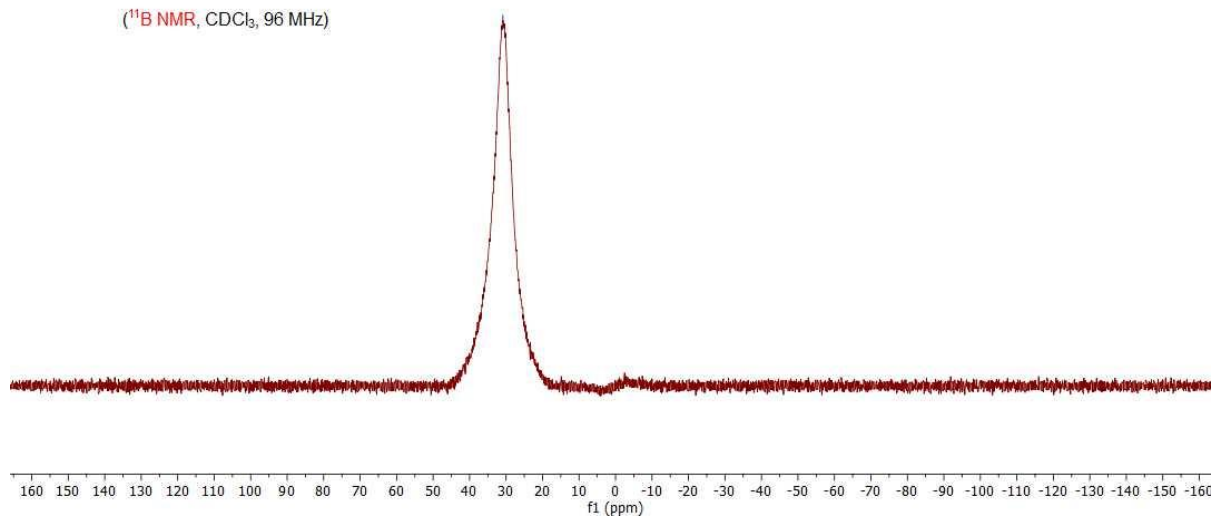

211125.334.10.fid — Fupeng Wu Ub-54 — Au1H CDCl3 {C:\Bruker\TopSpin3.6.2} 2111 34 — 300.13MHz

7.95, 7.94, 7.93, 7.91, 7.74, 7.73, 7.72, 7.71, 7.70, 7.69, 7.68, 7.66, 7.44, 7.43, 7.41, 7.41, 7.40, 7.39, 7.39, 7.26, 7.24, 7.24, 7.21, 7.21, 6.39, 6.39, 6.38, 6.38, 6.37, 6.37, 6.26, 6.26, 6.25, 6.24, 6.24

2.97, 2.95, 2.94, 2.93, 2.92, 2.91, 2.89, 2.87, 2.85, 2.35

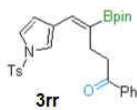

(<sup>1</sup>H NMR, CDCl<sub>3</sub>, 300 MHz)

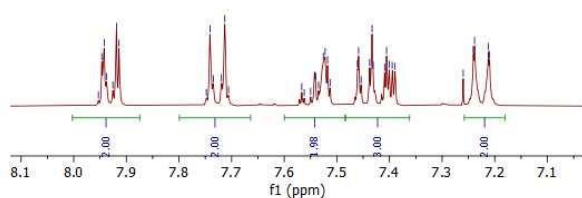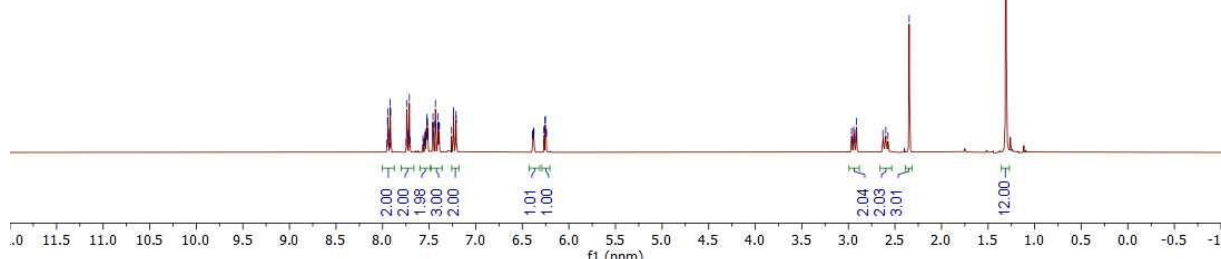

211125.334.11.fid — Fupeng Wu Ub-54 — Au13C CDCl3 {C:\Bruker\TopSpin3.6.2} 2111 34 — 75.48MHz

199.8

144.9, 136.7, 135.8, 132.8, 130.9, 130.6, 129.6, 128.4, 128.1, 127.5, 123.1, 116.2, 111.8

83.5, 77.0 CDCl<sub>3</sub>

37.8

25.0, 24.8, 21.6

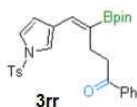

(<sup>13</sup>C NMR, CDCl<sub>3</sub>, 75 MHz)

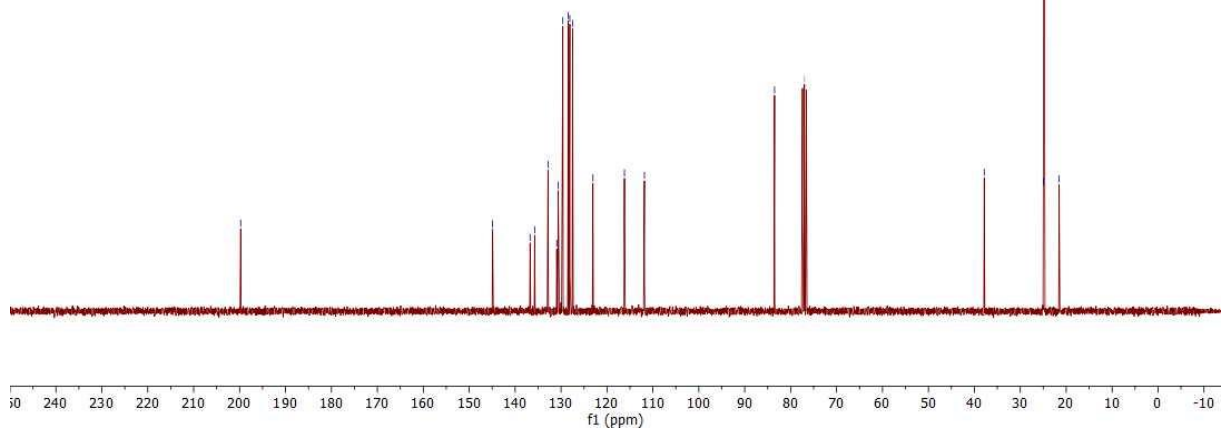

30.6

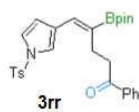

(<sup>11</sup>B NMR, CDCl<sub>3</sub>, 96 MHz)

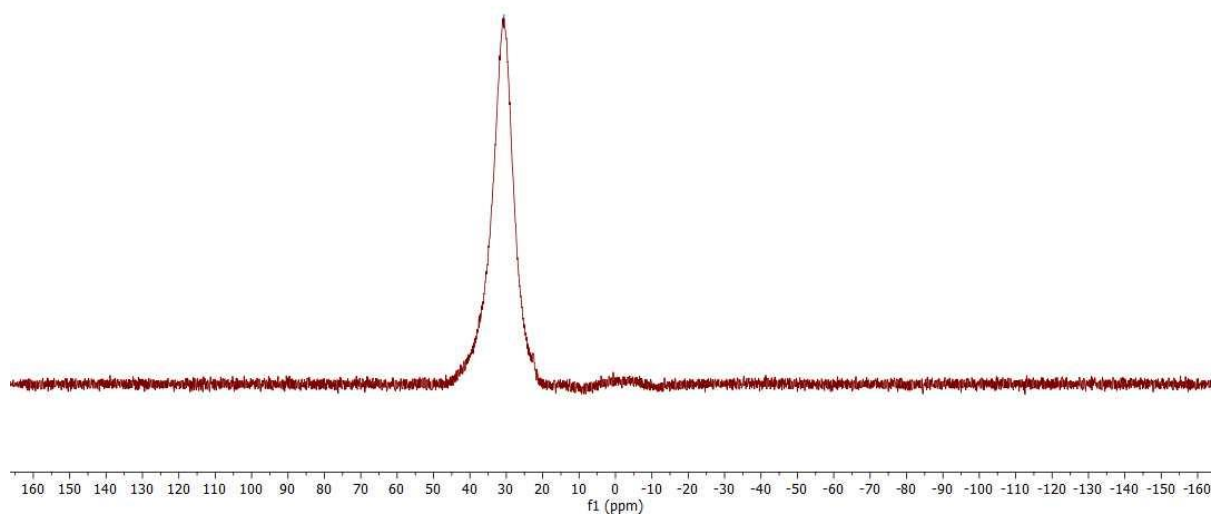

211124.324.10.fid — Fupeng Wu Ua-1 — Au1H CDCl3 {C:\Bruker\TopSpin3.6.2} 2111 24 — 300.13MHz

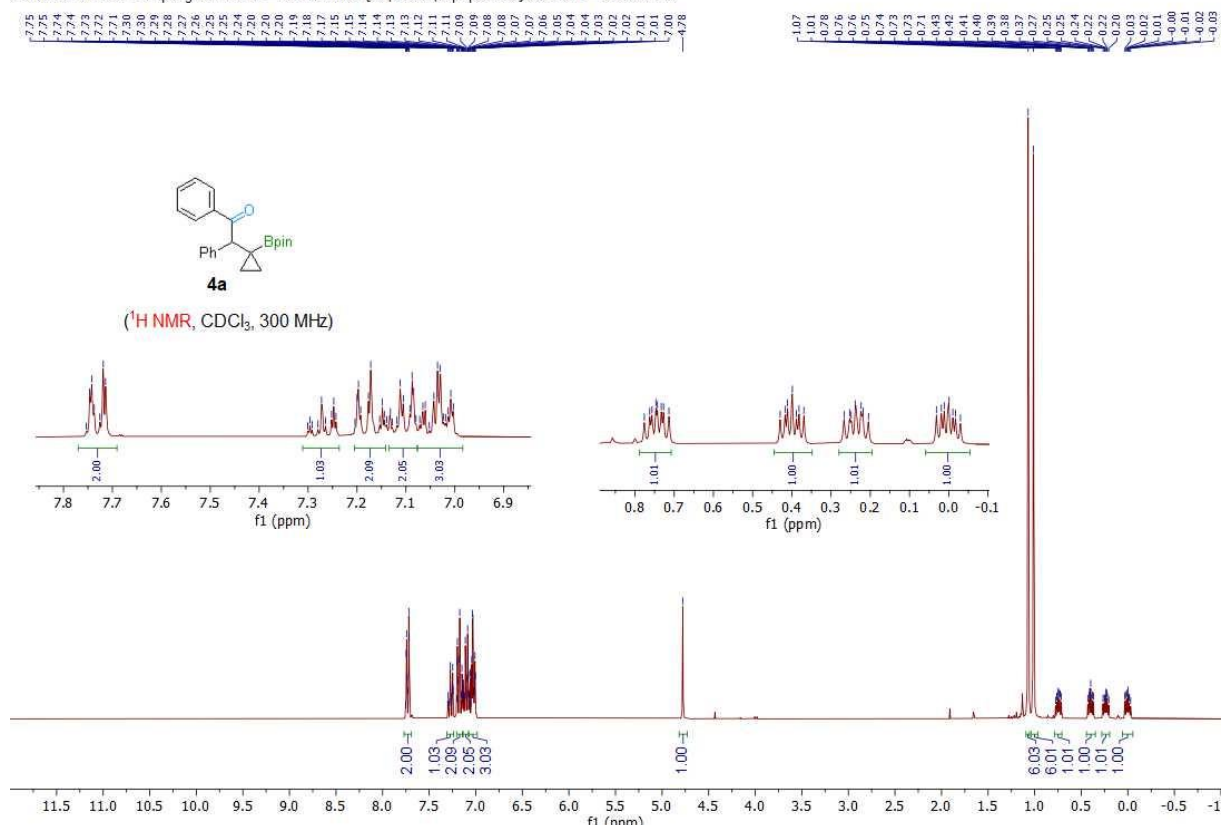

211124.324.11.fid — Fupeng Wu Ua-1 — Au13C CDCl3 {C:\Bruker\TopSpin3.6.2} 2111 24 — 75.48MHz

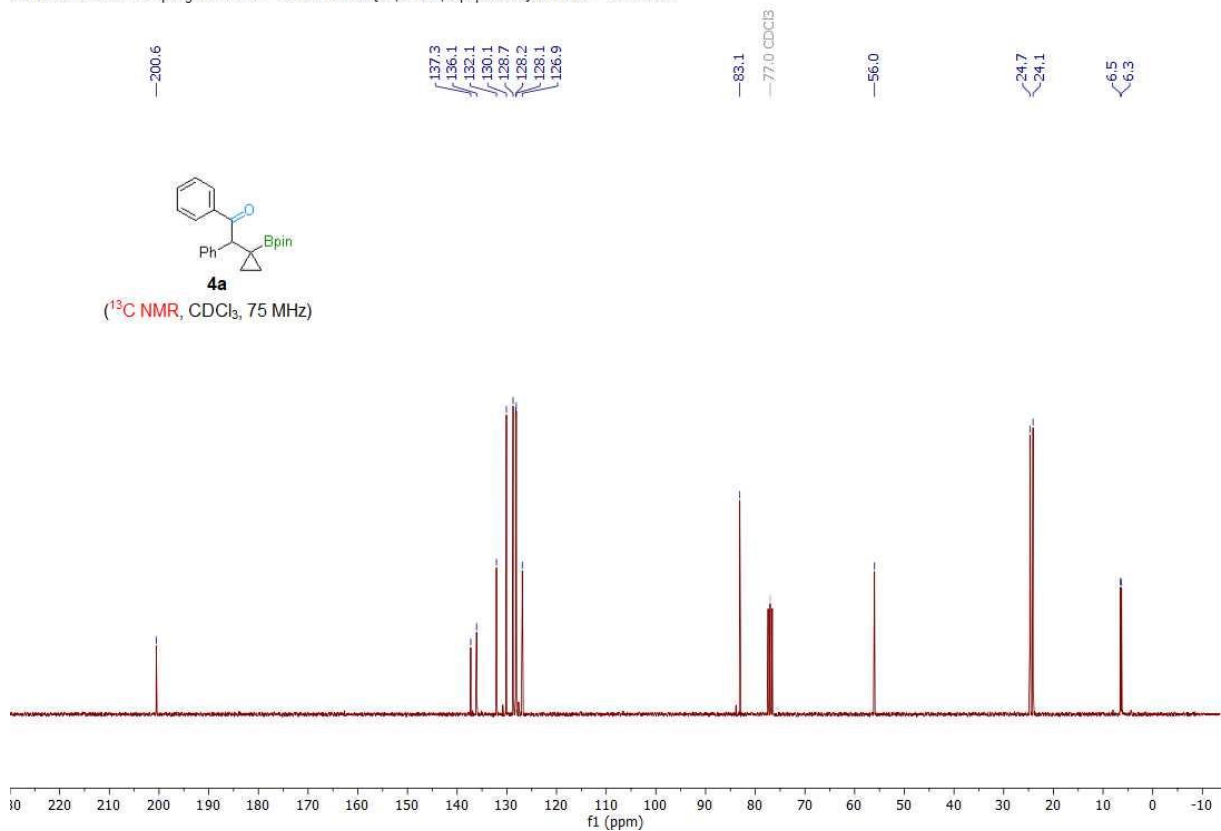

33.3

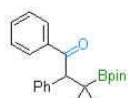

**4a**

(<sup>11</sup>B NMR, CDCl<sub>3</sub>, 96 MHz)

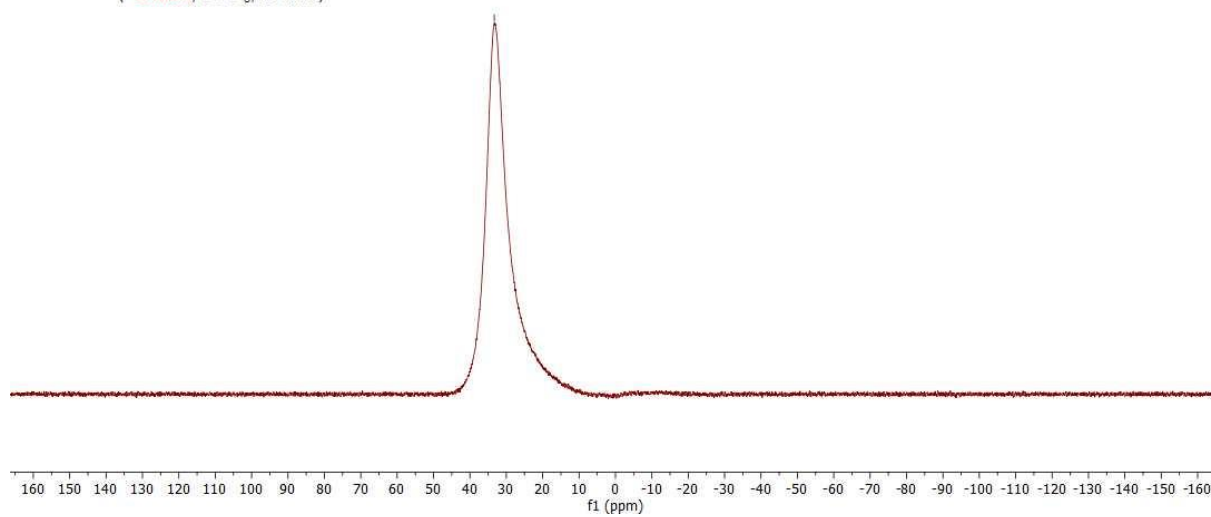

211112.335.10.fid — Fupeng Wu Ua-10 — Au1H CDCl3 {C:\Bruker\TopSpin3.6.2} 2111 35 — 300.13MHz

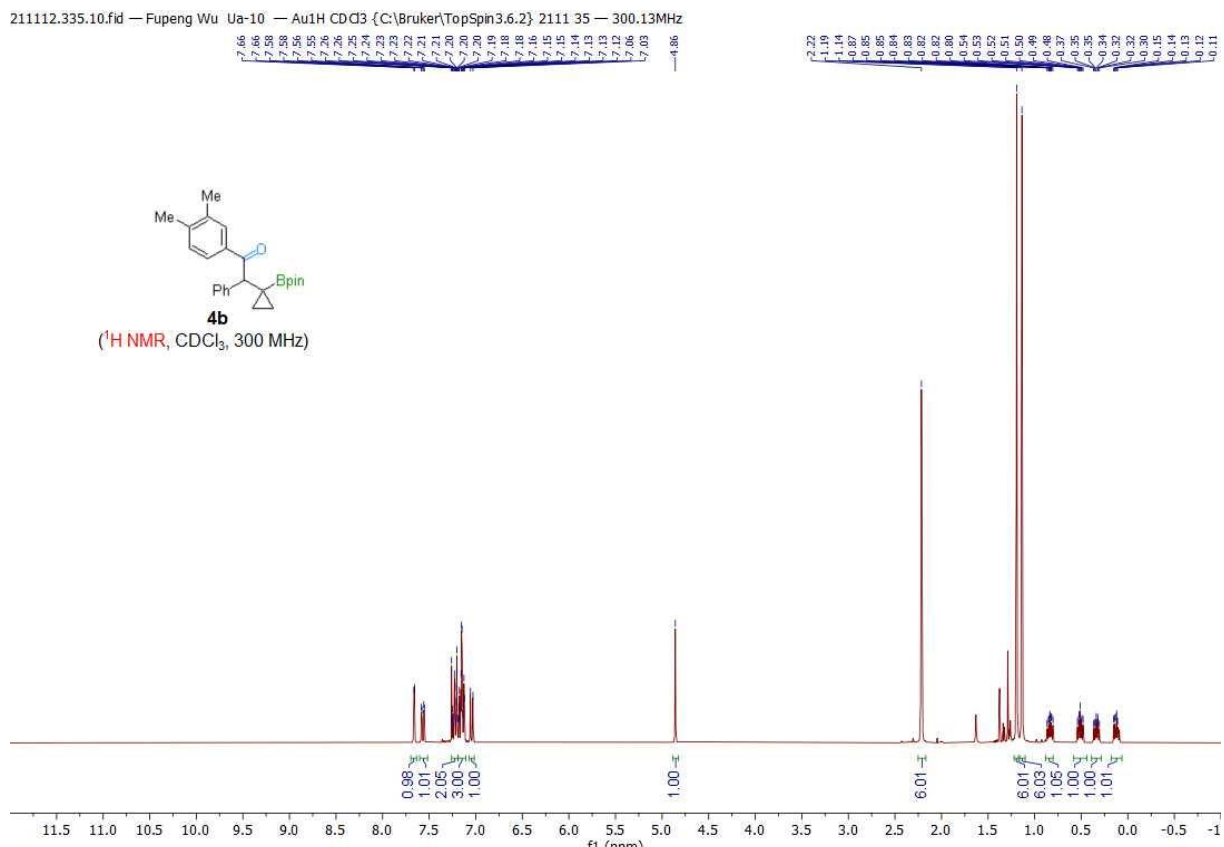

211112.335.11.fid — Fupeng Wu Ua-10 — Au13C CDCl3 {C:\Bruker\TopSpin3.6.2} 2111 35 — 75.48MHz

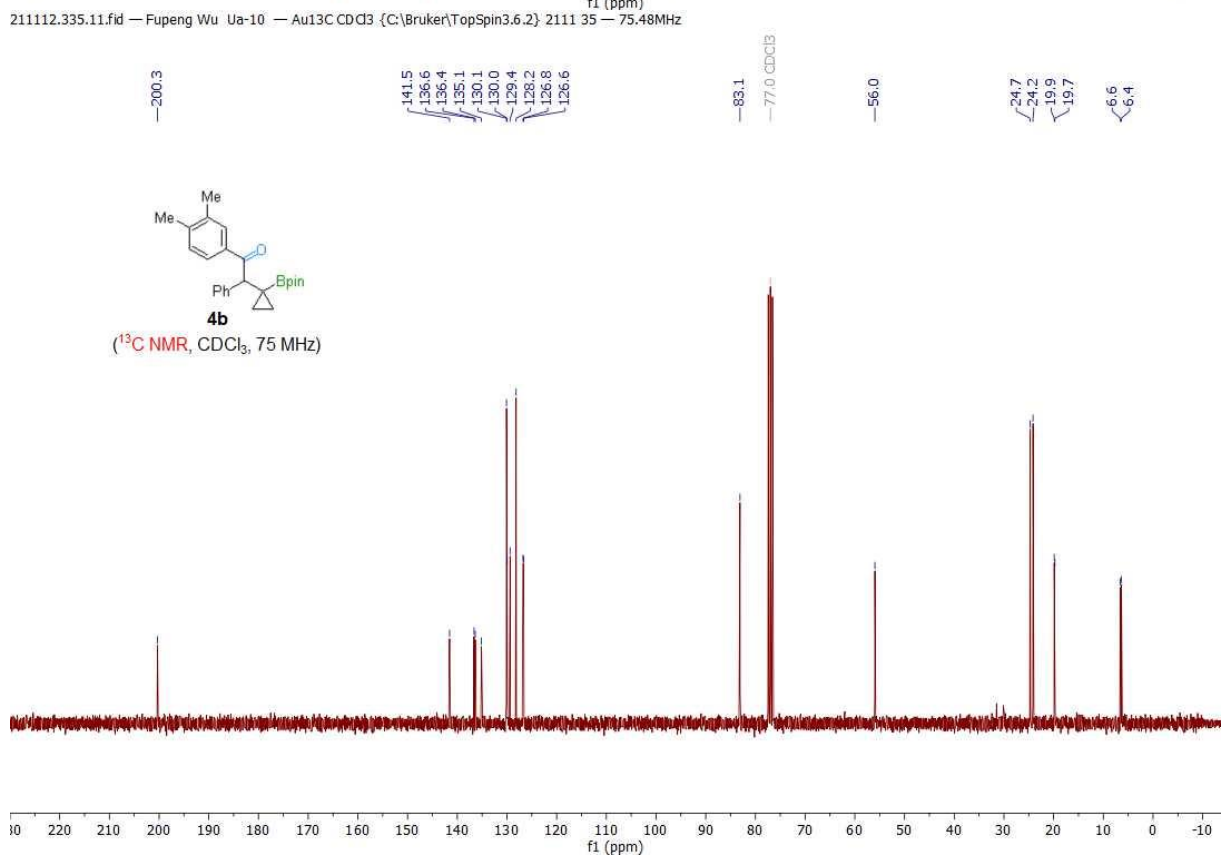

— 32.9

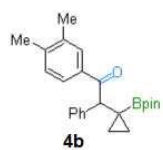

**4b**  
(<sup>11</sup>B NMR, CDCl<sub>3</sub>, 96 MHz)

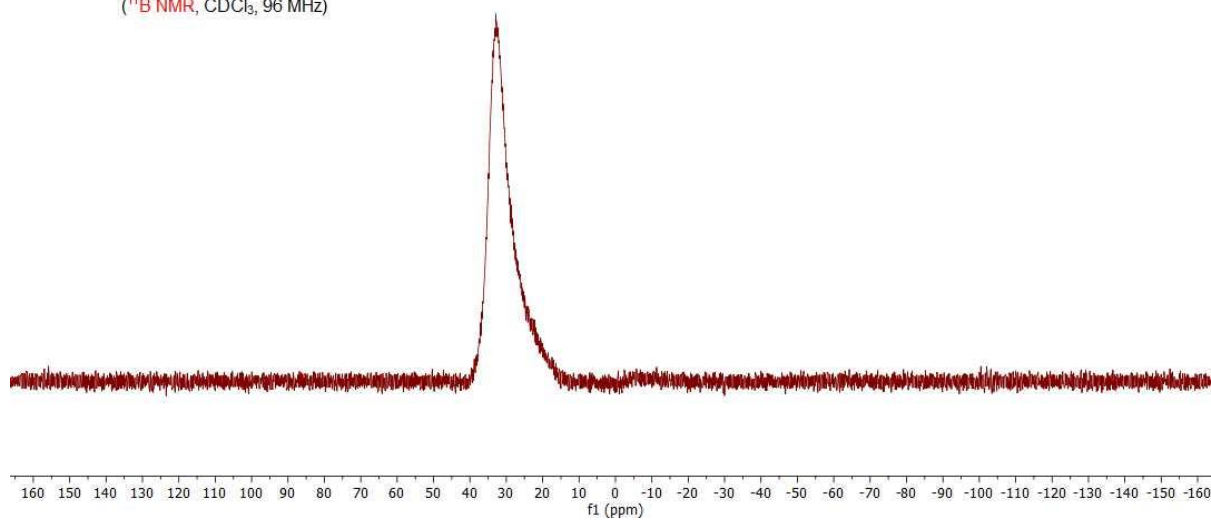

211112.330.10.fid — Fupeng Wu Ua-9 — Au1H CDCl3 {C:\Bruker\TopSpin3.6.2} 2111 30 — 300.13MHz

7.69  
7.68  
7.68  
7.68  
7.67  
7.64  
7.63  
7.63  
7.63  
7.62  
7.61  
7.60  
7.36  
7.26  
7.26  
7.24  
7.24  
7.23  
7.22  
7.21  
7.20  
7.20  
7.19  
7.19  
7.12  
7.12  
7.15  
7.14  
7.14  
7.13  
7.12  
7.12  
4.87  
2.31  
1.19  
1.14  
-0.88  
-0.88  
-0.86  
-0.86  
-0.83  
-0.83  
-0.81  
-0.54  
-0.53  
-0.52  
-0.51  
-0.49  
-0.48  
-0.38  
-0.36  
-0.35  
-0.33  
-0.32  
-0.15  
-0.14  
-0.13  
-0.12  
-0.11  
m

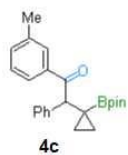

(<sup>1</sup>H NMR, CDCl<sub>3</sub>, 300 MHz)

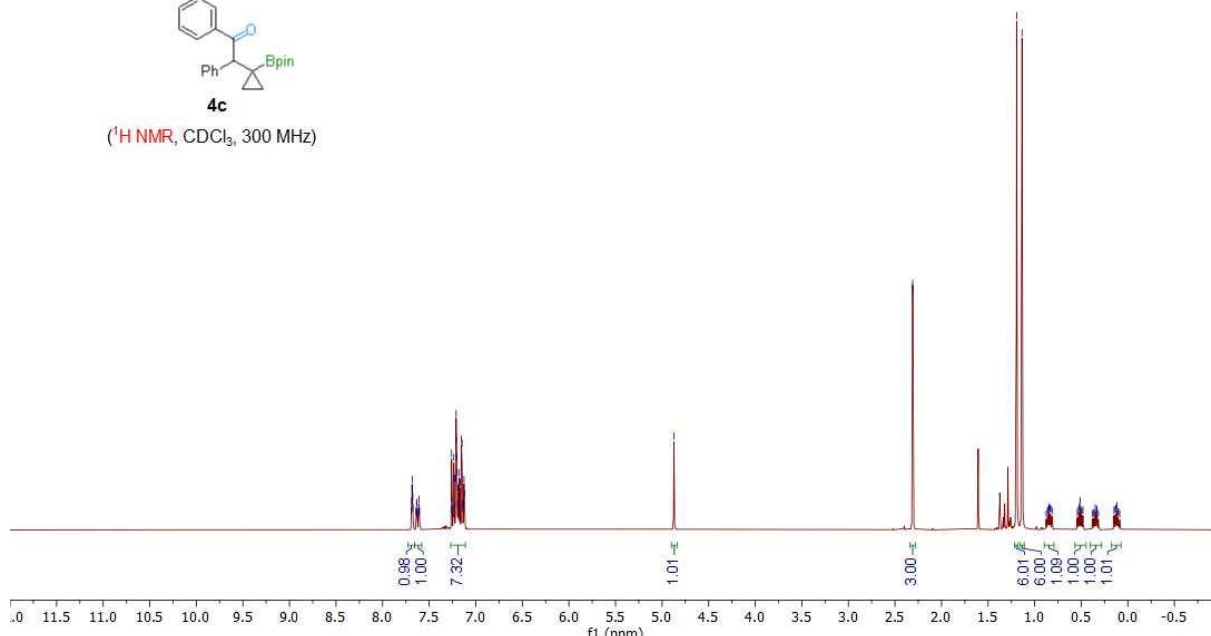

211112.330.11.fid — Fupeng Wu Ua-9 — Au13C CDCl3 {C:\Bruker\TopSpin3.6.2} 2111 30 — 75.48MHz

—200.8

137.8  
137.4  
136.3  
132.9  
130.1  
129.3  
128.2  
128.0  
126.9  
126.1

—83.2  
—77.0 CDCl3

—56.1

24.8  
24.2  
21.3

6.6  
6.4

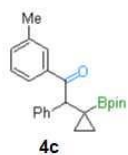

(<sup>13</sup>C NMR, CDCl<sub>3</sub>, 75 MHz)

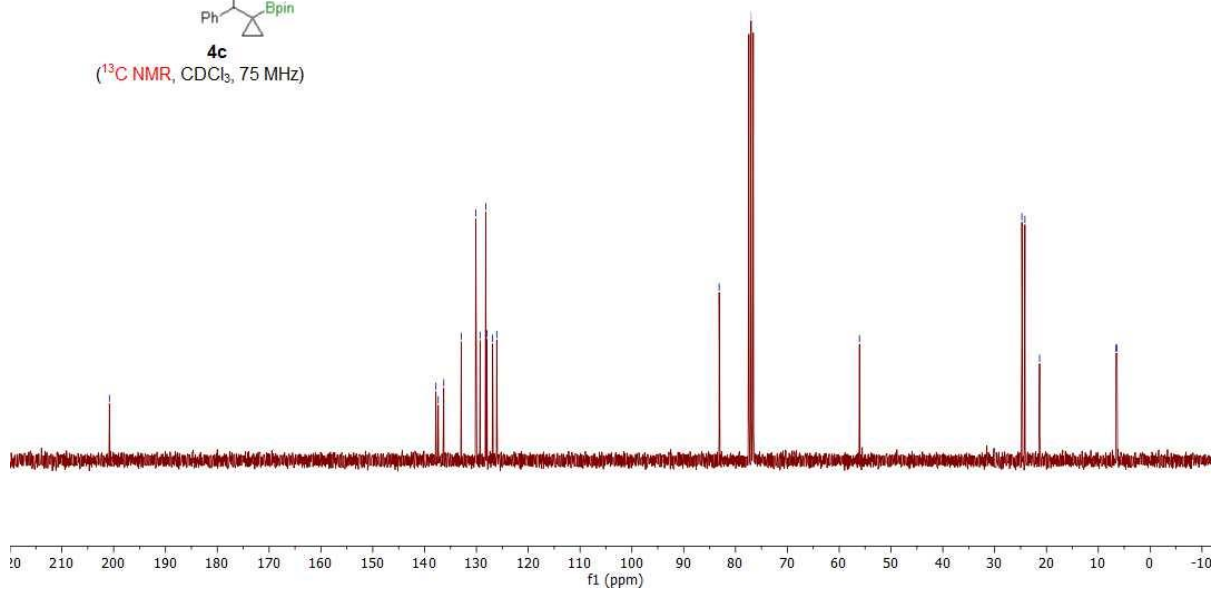



— 33.0

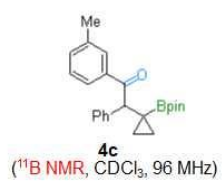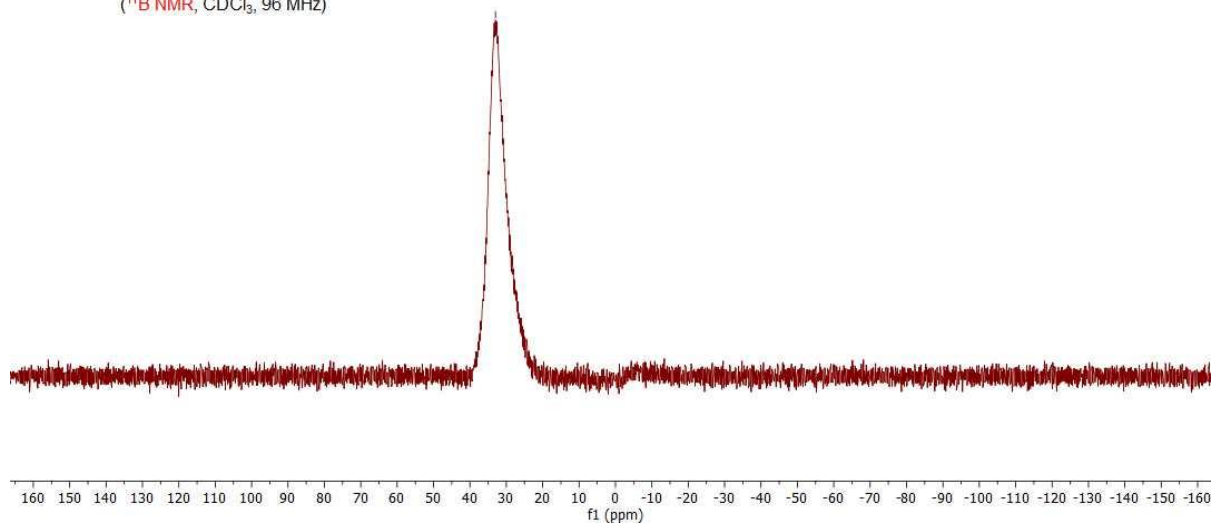

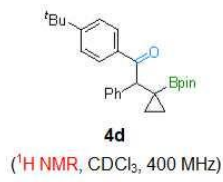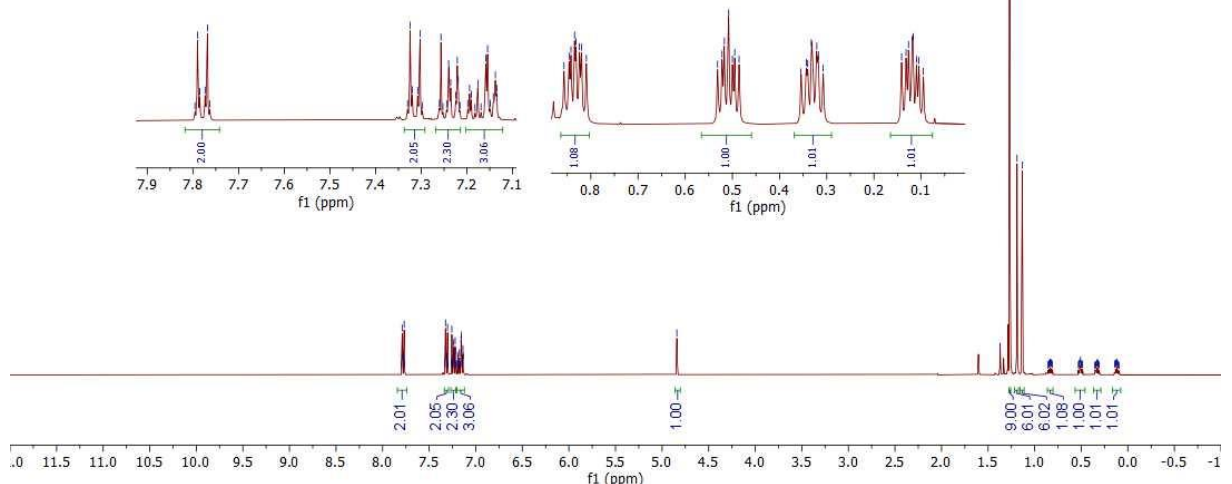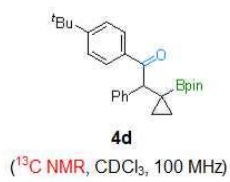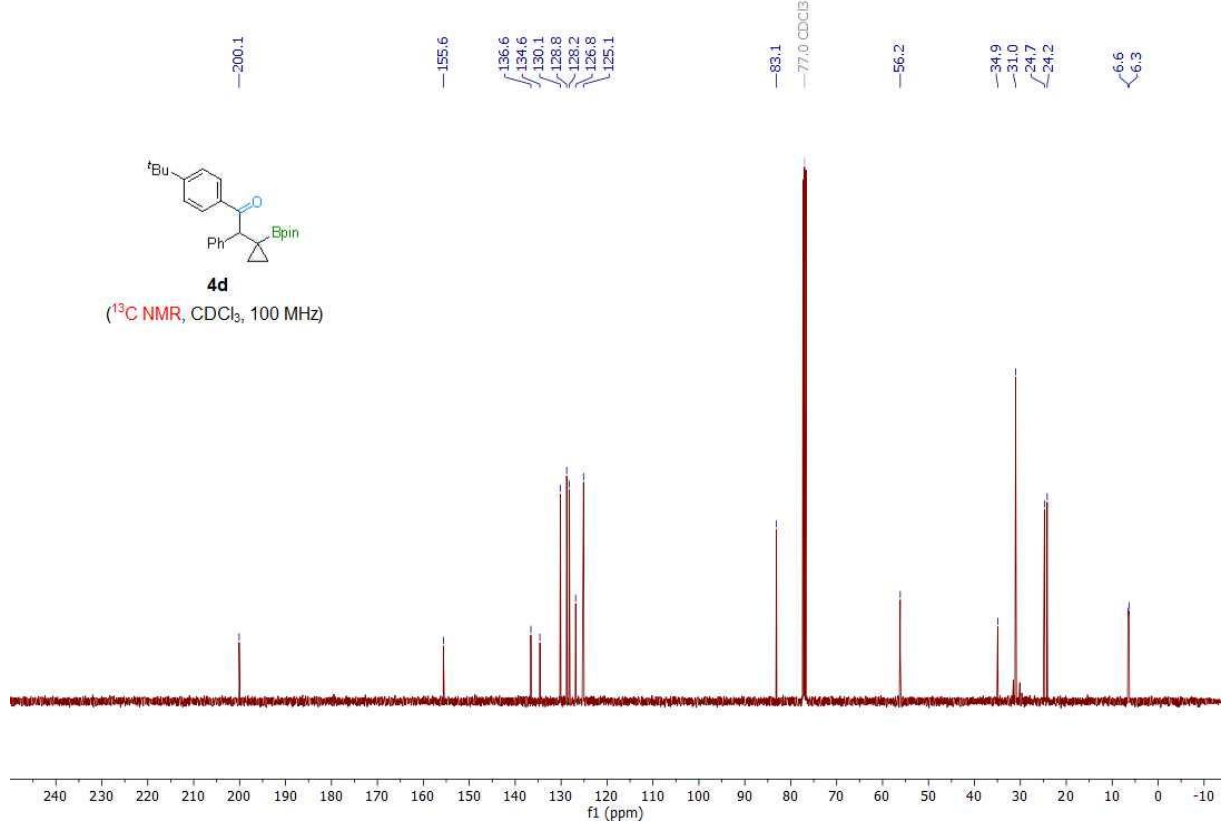

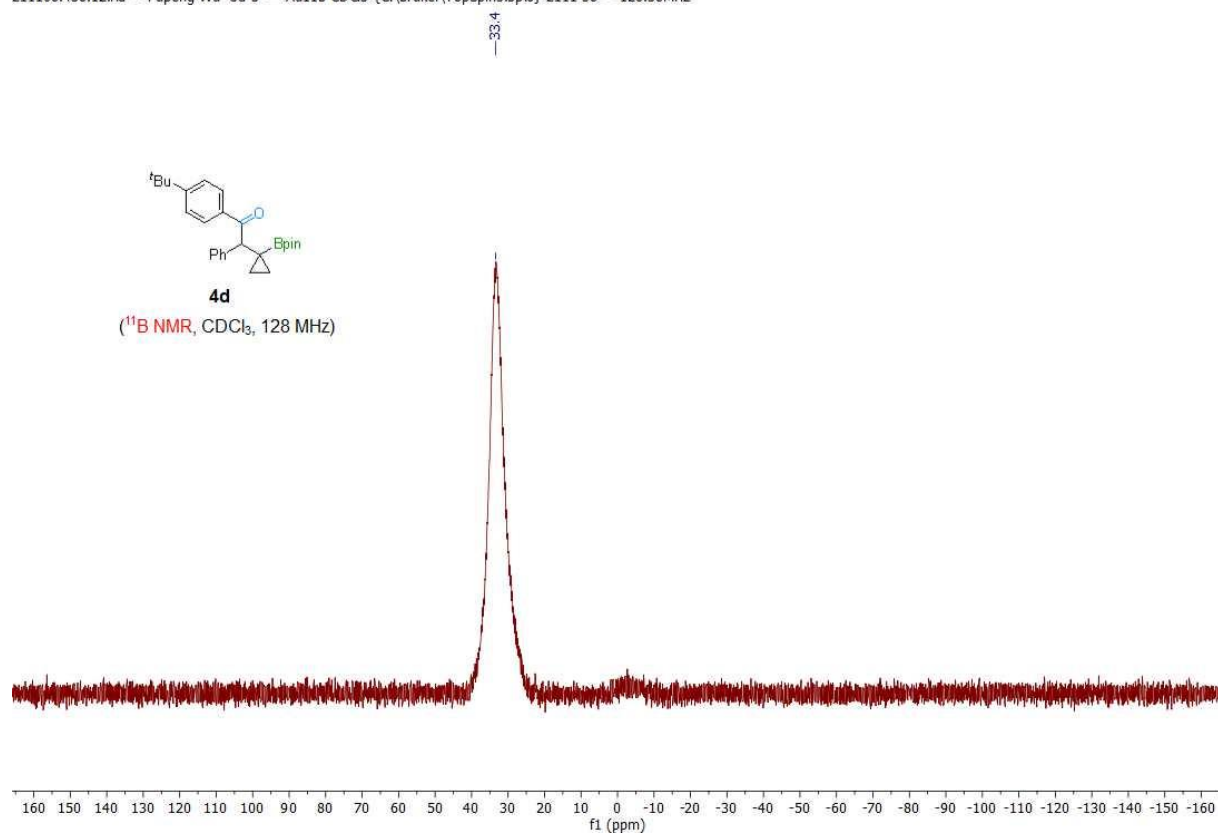

211112.333.10.fid — Fupeng Wu Ua-4 — Au1H CDCl3 {C:\Bruker\TopSpin3.6.2} 2111 33 — 300.13MHz

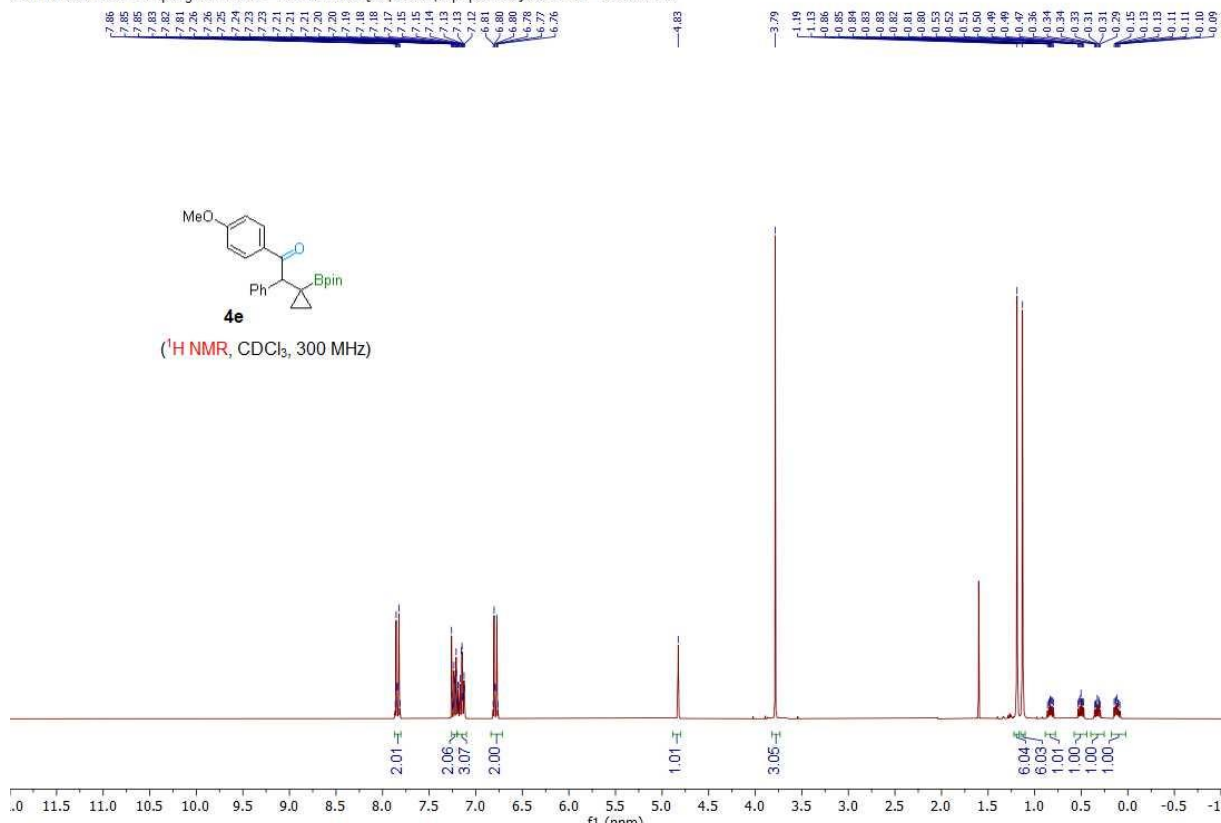

211112.333.11.fid — Fupeng Wu Ua-4 — Au13C CDCl3 {C:\Bruker\TopSpin3.6.2} 2111 33 — 75.48MHz

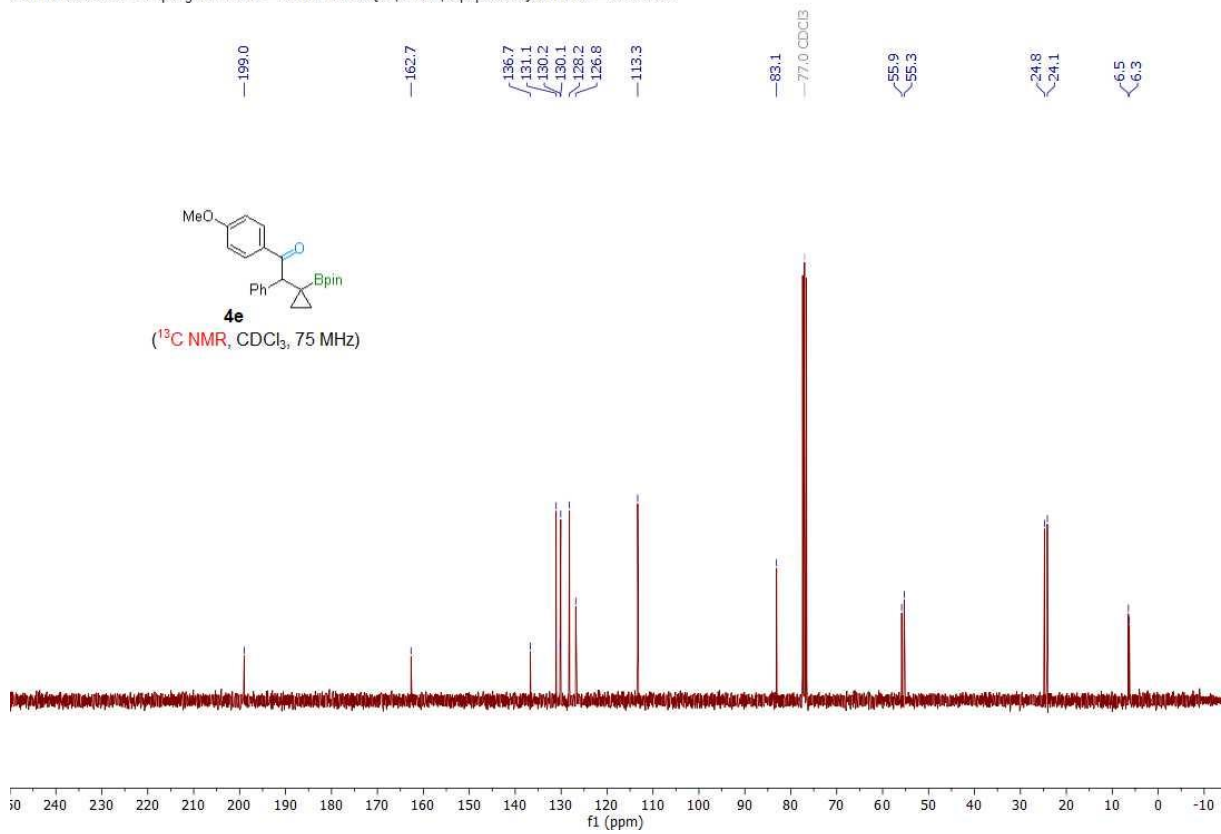

—30.3

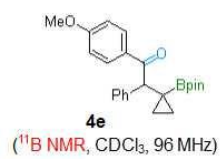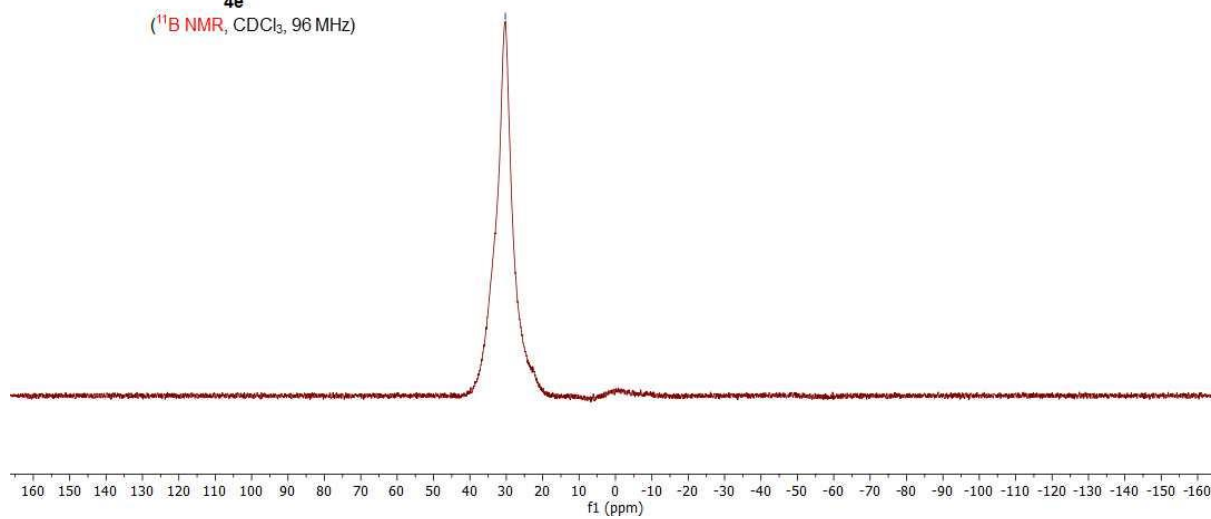

211118.344.10.fid — Fupeng Wu Ua-19 — Au1H CDCl3 {C:\Bruker\TopSpin3.6.2} 2111 44 — 300.13MHz

7.93  
7.91  
7.90  
7.89  
7.88  
7.87  
7.86  
7.85  
7.84  
7.83  
7.82  
7.81  
7.80  
7.79  
7.78  
7.77  
7.76  
7.75  
7.74  
7.73  
7.72  
7.71  
7.70  
7.69  
7.68  
7.67  
7.66  
7.65  
7.64  
7.63  
7.62  
7.61  
7.60  
7.59  
7.58  
7.57  
7.56  
7.55  
7.54  
7.53  
7.52  
7.51  
7.50  
7.49  
7.48  
7.47  
7.46  
7.45  
7.44  
7.43  
7.42  
7.41  
7.40  
7.39  
7.38  
7.37  
7.36  
7.35  
7.34  
7.33  
7.32  
7.31  
7.30  
7.29  
7.28  
7.27  
7.26  
7.25  
7.24  
7.23  
7.22  
7.21  
7.20  
7.19  
7.18  
7.17  
7.16  
7.15  
7.14  
7.13  
7.12  
7.11  
7.10  
7.09  
7.08  
7.07  
7.06  
7.05  
7.04  
7.03  
7.02  
7.01  
7.00  
6.99  
6.98  
6.97  
6.96  
6.95  
6.94  
6.93  
6.92  
6.91  
6.90  
6.89  
6.88  
6.87  
6.86  
6.85  
6.84  
6.83  
6.82  
6.81  
6.80  
6.79  
6.78  
6.77  
6.76  
6.75  
6.74  
6.73  
6.72  
6.71  
6.70  
6.69  
6.68  
6.67  
6.66  
6.65  
6.64  
6.63  
6.62  
6.61  
6.60  
6.59  
6.58  
6.57  
6.56  
6.55  
6.54  
6.53  
6.52  
6.51  
6.50

4.29  
4.20  
1.01  
0.99  
0.98  
0.97  
0.96  
0.95  
0.94  
0.93  
0.92  
0.91  
0.90  
0.89  
0.88  
0.87  
0.86  
0.85  
0.84  
0.83  
0.82  
0.81  
0.80  
0.79  
0.78  
0.77  
0.76  
0.75  
0.74  
0.73  
0.72  
0.71  
0.70  
0.69  
0.68  
0.67  
0.66  
0.65  
0.64  
0.63  
0.62  
0.61  
0.60  
0.59  
0.58  
0.57  
0.56  
0.55  
0.54  
0.53  
0.52  
0.51  
0.50

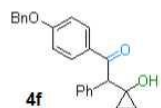

**4f**

(<sup>1</sup>H NMR, CDCl<sub>3</sub>, 300 MHz)

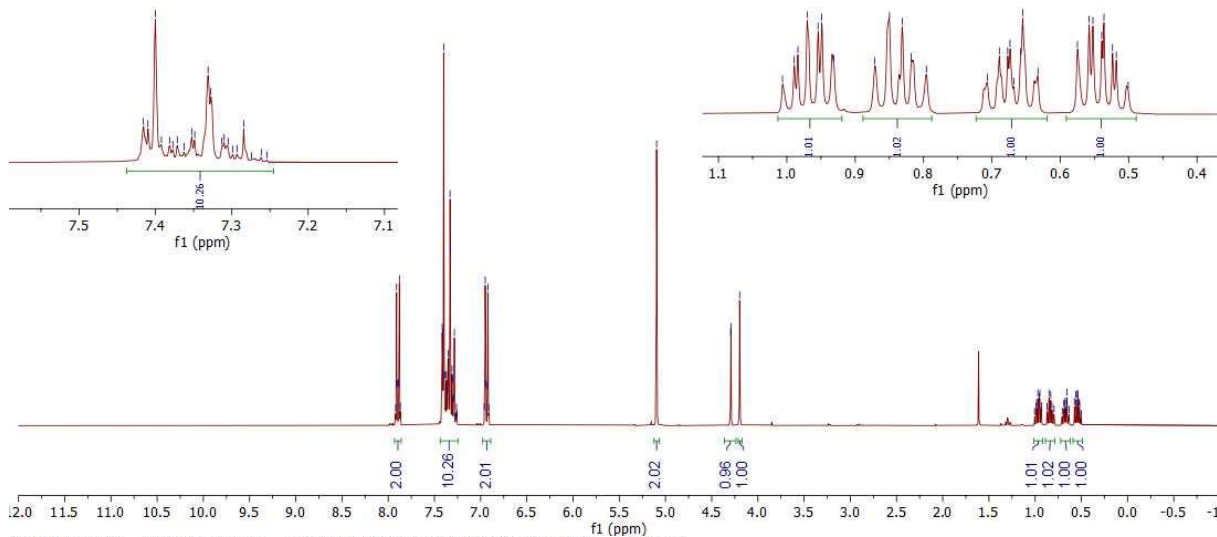

211118.344.11.fid — Fupeng Wu Ua-19 — Au13C CDCl3 {C:\Bruker\TopSpin3.6.2} 2111 44 — 75.48MHz

200.4  
162.8  
136.8  
136.0  
131.3  
129.2  
128.9  
128.8  
128.7  
128.3  
127.4  
114.6  
77.0 CDCl3  
70.1  
59.1  
57.3  
13.3  
11.4

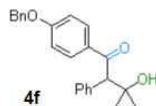

**4f**

(<sup>13</sup>C NMR, CDCl<sub>3</sub>, 75 MHz)

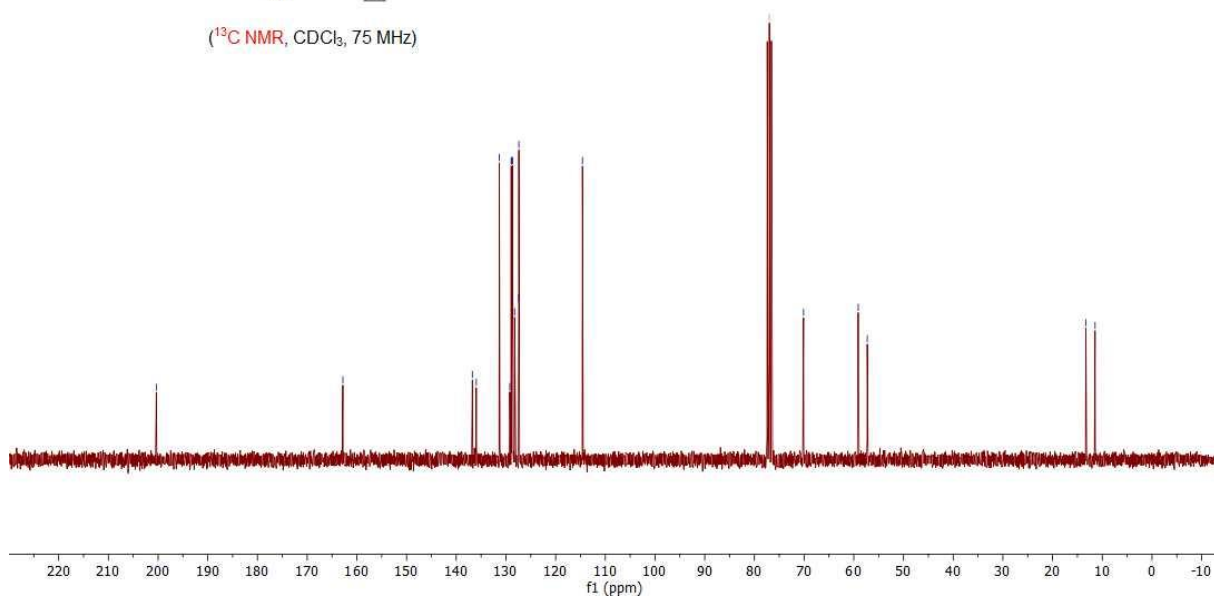

211116.337.10.fid — Fupeng Wu Ua-22 — Au1H CDCl3 {C:\Bruker\TopSpin3.6.2} 2111 37 — 300.13MHz

7.91  
7.90  
7.88  
7.87  
7.86  
7.29  
7.26  
7.26  
7.25  
7.24  
7.23  
7.23  
7.23  
7.22  
7.20  
7.19  
7.17  
7.15  
7.13  
7.12  
7.12  
7.11  
7.10  
7.08  
7.06  
1.19  
1.13  
0.90  
0.88  
0.88  
0.87  
0.87  
0.85  
0.85  
0.84  
0.53  
0.52  
0.52  
0.51  
0.49  
0.47  
0.36  
0.35  
0.34  
0.33  
0.33  
0.12  
0.10  
0.08  
0.08  
0.07

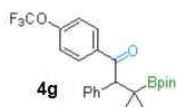

(<sup>1</sup>H NMR, CDCl<sub>3</sub>, 300 MHz)

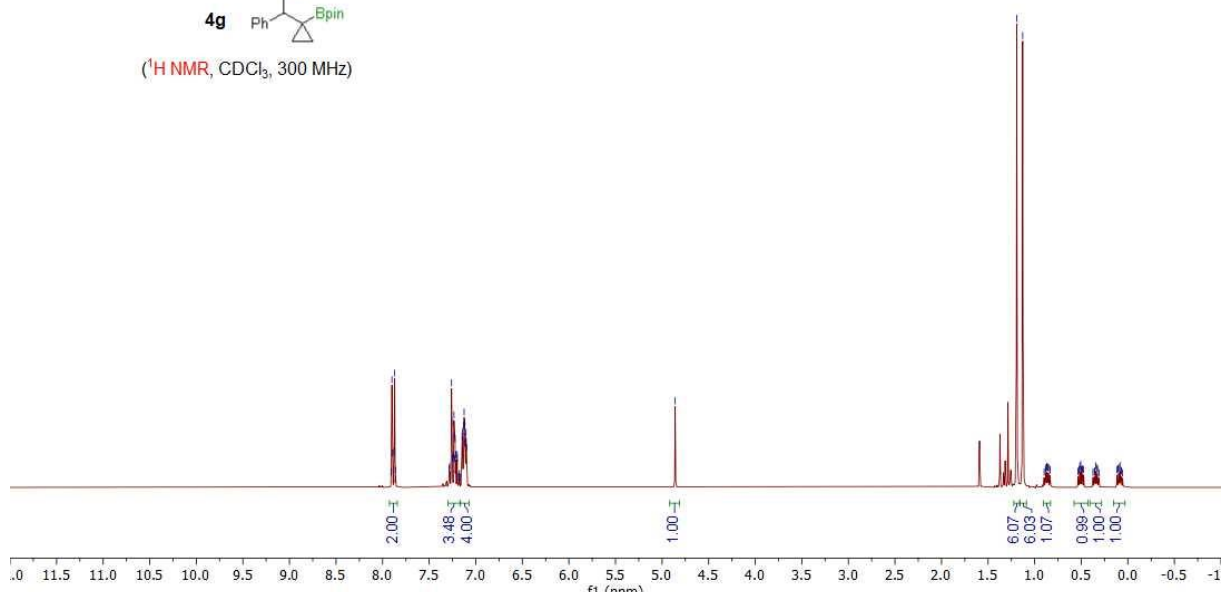

211118.350.11.fid — Fupeng Wu Ua-22 — Au13C CDCl3 {C:\Bruker\TopSpin3.6.2} 2111 50 — 75.48MHz

199.2  
151.8  
135.6  
135.5  
130.7  
130.1  
128.4  
127.2  
125.4  
121.9  
120.0  
118.5  
115.1  
83.3  
77.0 CDCl3  
56.1  
24.8  
24.1  
6.5  
6.2

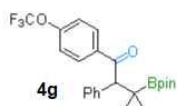

(<sup>13</sup>C NMR, CDCl<sub>3</sub>, 75 MHz)

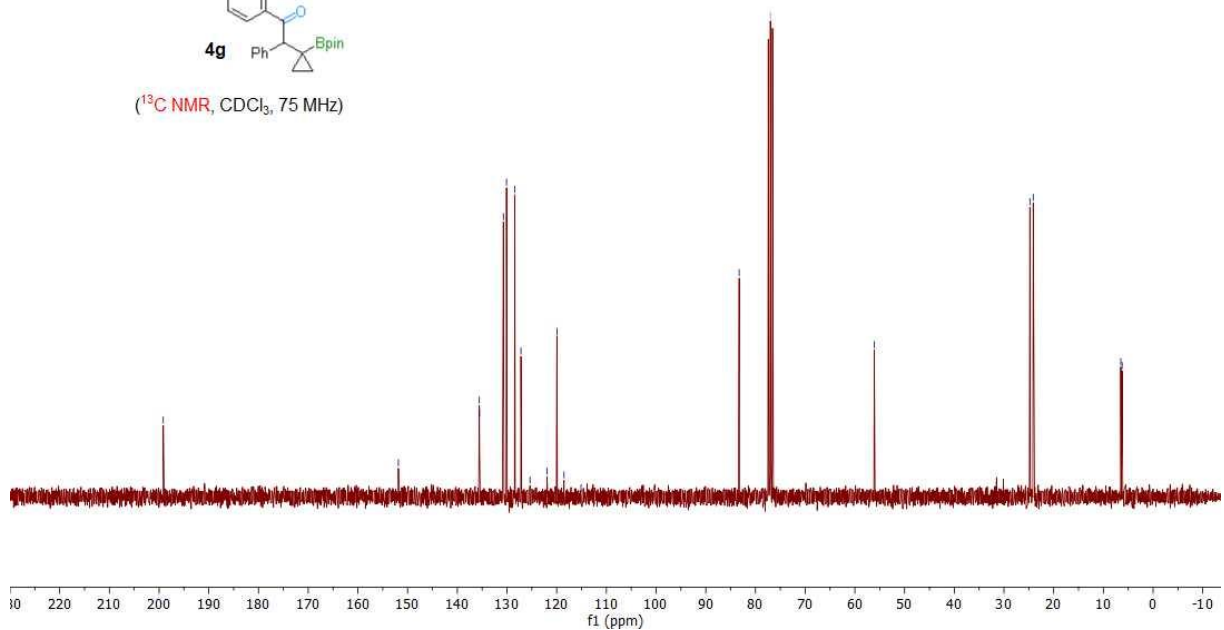

83.3

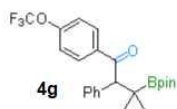

(<sup>11</sup>B NMR, CDCl<sub>3</sub>, 96 MHz)

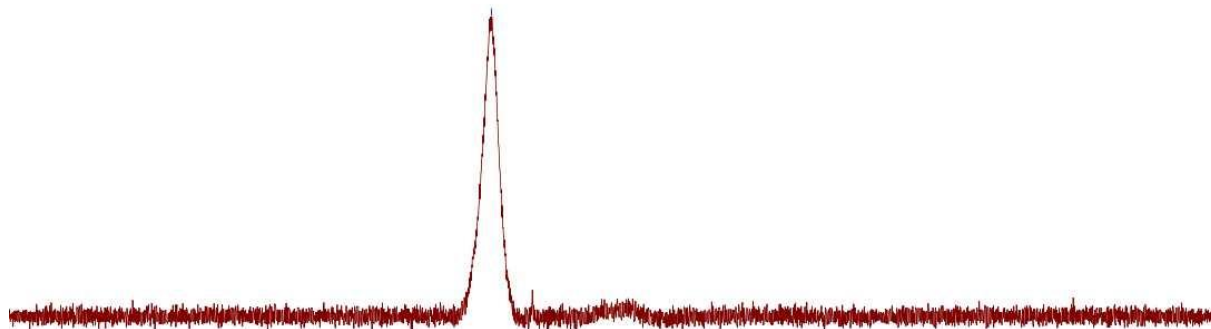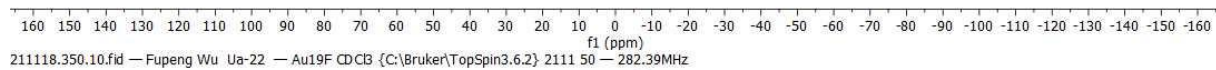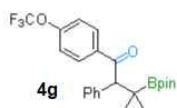

(<sup>19</sup>F NMR, CDCl<sub>3</sub>, 282 MHz)

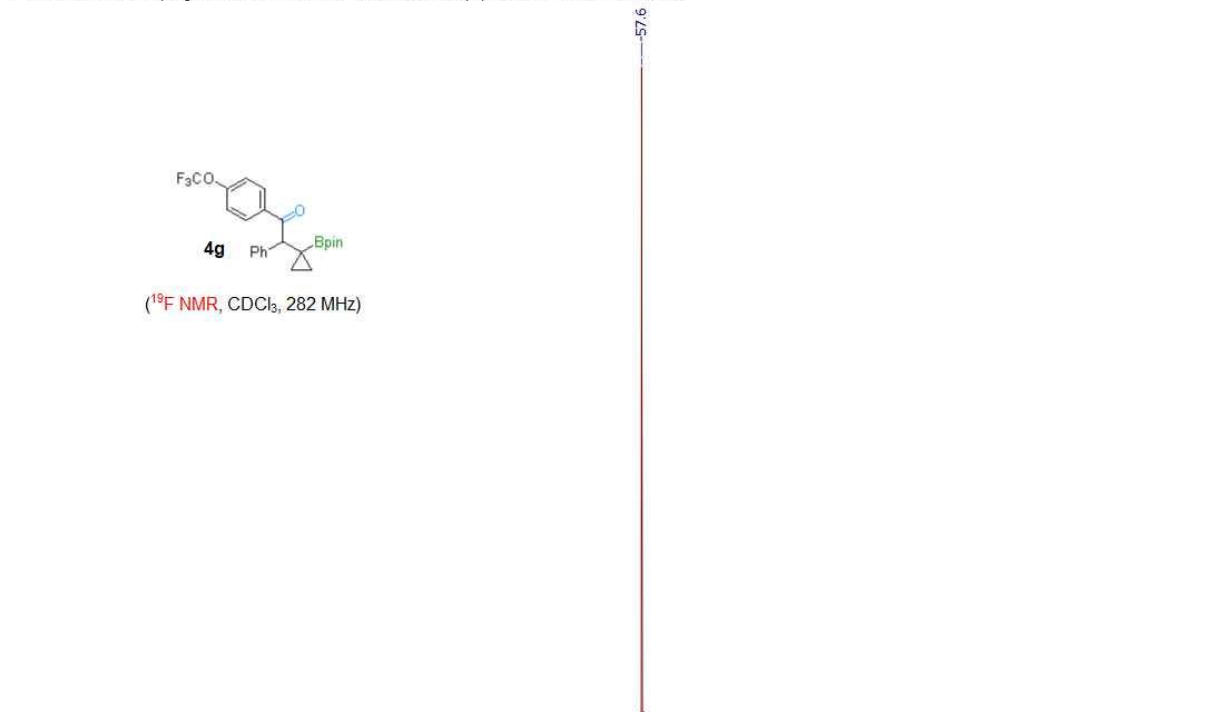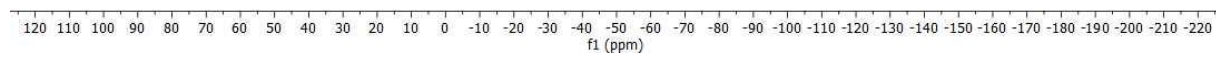



211122.f334.10.fid — Fupeng Wu Ua-7 — PROTON CDCl3 {C:\Bruker\TopSpin3.6.2} 2111 34 — 300.20MHz

7.84  
7.83  
7.81  
7.80  
7.76  
7.75  
7.72  
7.26  
7.24  
7.23  
7.22  
7.21  
7.20  
7.19  
7.18  
7.17  
7.15  
7.13  
7.12  
7.11  
7.10  
7.09  
4.90

1.31  
1.19  
1.12  
0.88  
0.86  
0.85  
0.85  
0.84  
0.83  
0.82  
0.53  
0.51  
0.50  
0.49  
0.48  
0.47  
0.36  
0.34  
0.33  
0.32  
0.31  
0.13  
0.11  
0.09  
0.08  
0.07

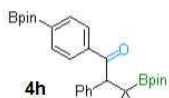

(<sup>1</sup>H NMR, CDCl<sub>3</sub>, 300 MHz)

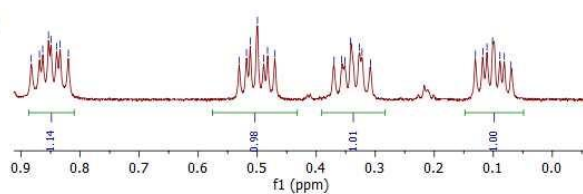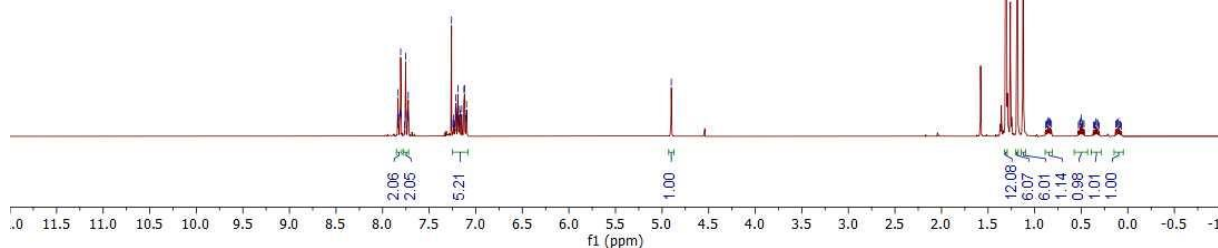

211124.325.10.fid — Fupeng Wu Ua-7 — Au13C CDCl3 {C:\Bruker\TopSpin3.6.2} 2111 25 — 75.48MHz

—200.9

139.3  
136.9  
134.5  
130.2  
128.2  
127.8  
126.9

84.0  
83.2  
—77.0 CDCl3

—56.1

24.8  
24.8  
24.1  
6.5  
6.3

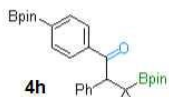

(<sup>13</sup>C NMR, CDCl<sub>3</sub>, 75 MHz)

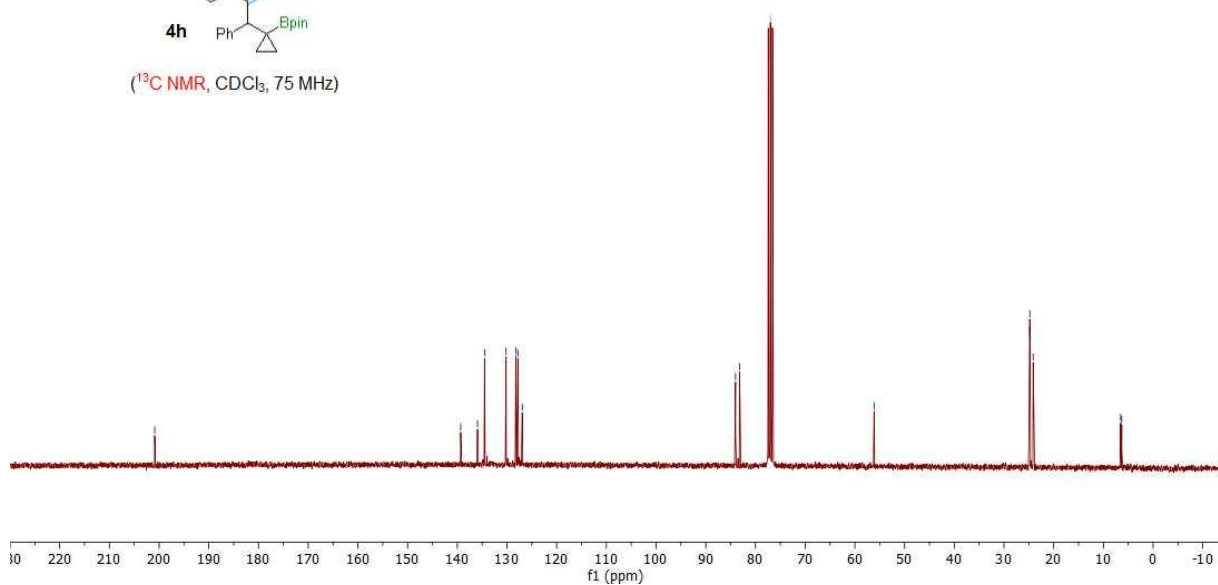

30.0

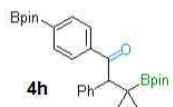

(<sup>11</sup>B NMR, CDCl<sub>3</sub>, 96 MHz)

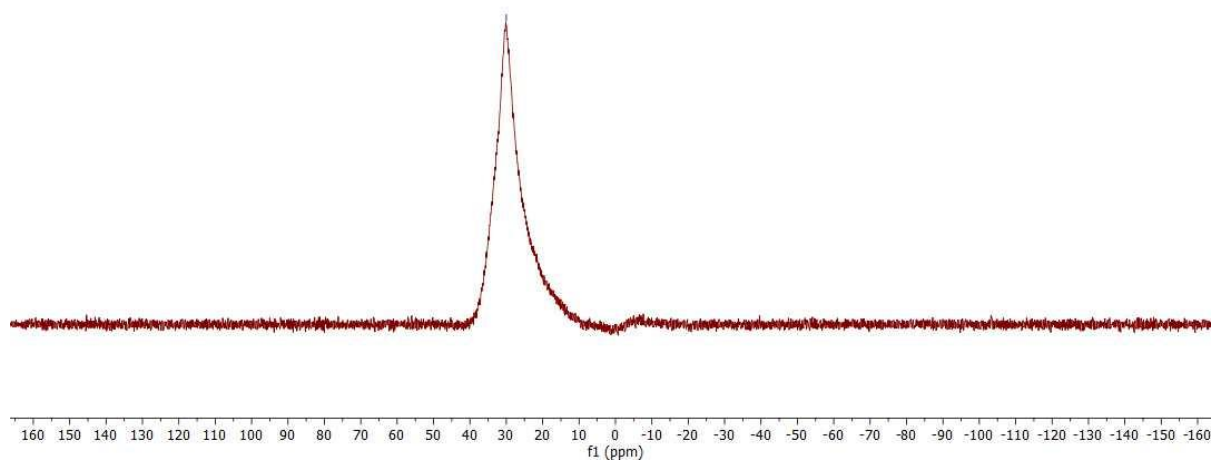



33.2

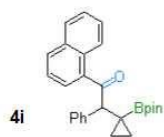

(<sup>11</sup>B NMR, CDCl<sub>3</sub>, 96 MHz)

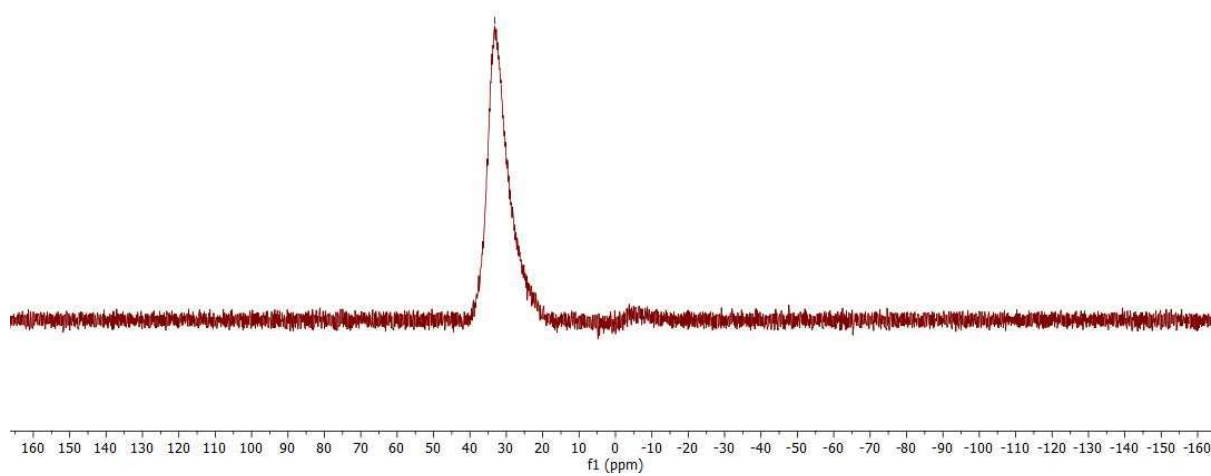

211105.434.10.fid — Fupeng Wu Ua-2 — Au1H CDCl3 {C:\Bruker\TopSpin3.5pl6} 2111 34 — 400.13MHz

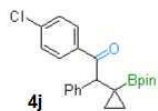

(<sup>1</sup>H NMR, CDCl<sub>3</sub>, 300 MHz)

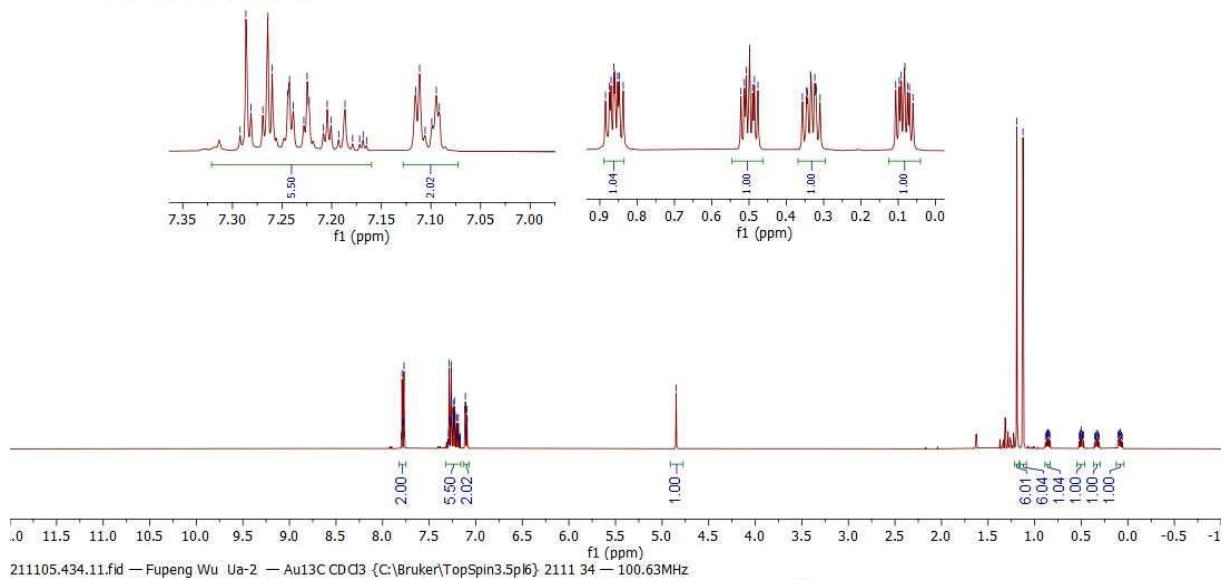

211105.434.11.fid — Fupeng Wu Ua-2 — Au13C CDCl3 {C:\Bruker\TopSpin3.5pl6} 2111 34 — 100.63MHz

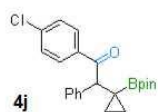

(<sup>13</sup>C NMR, CDCl<sub>3</sub>, 100 MHz)

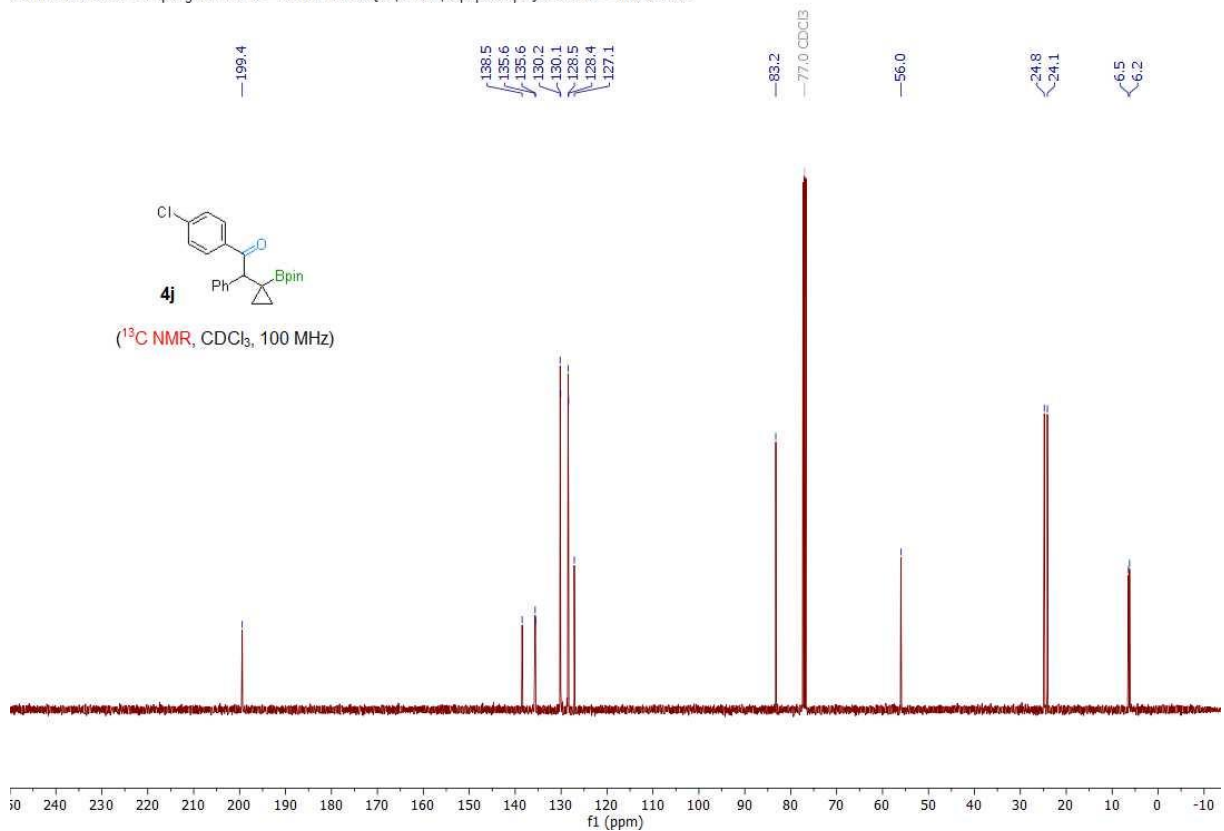

33.3

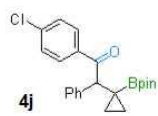

(<sup>11</sup>B NMR, CDCl<sub>3</sub>, 128 MHz)

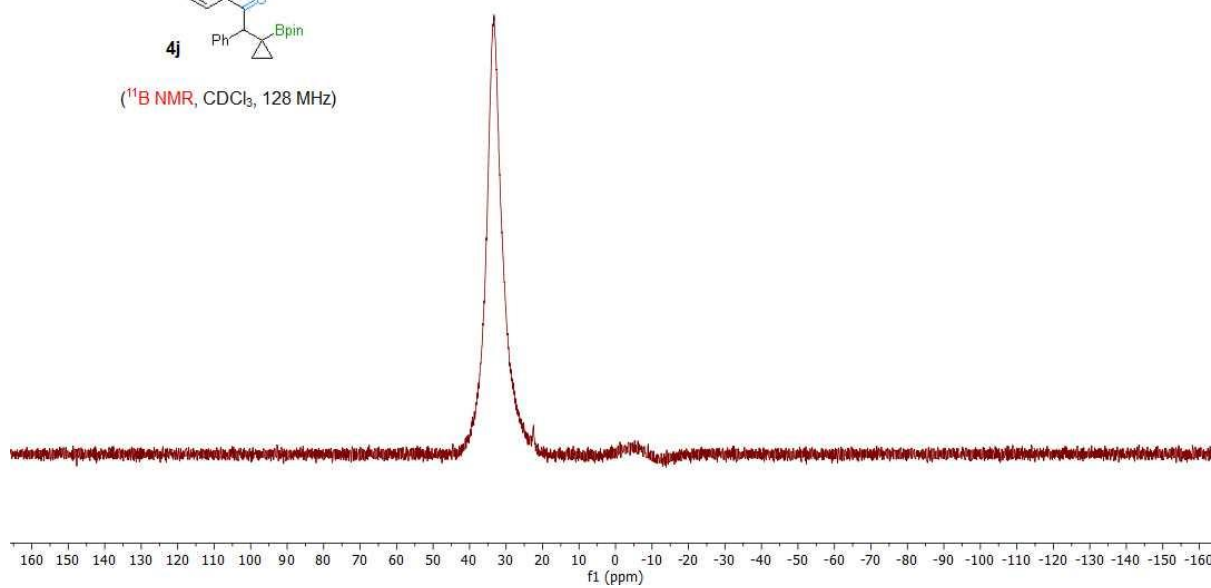

211112.334.10.fid — Fupeng Wu Ua-13 — Au1H CDCl3 {C:\Bruker\TopSpin3.6.2} 2111 34 — 300.13MHz

7.73 7.72 7.71 7.70 7.69 7.68 7.67 7.66 7.65 7.64 7.63 7.62 7.61 7.60 7.59 7.58 7.57 7.56 7.55 7.54 7.53 7.52 7.51 7.50 7.49 7.48 7.47 7.46 7.45 7.44 7.43 7.42 7.41 7.40 7.39 7.38 7.37 7.36 7.35 7.34 7.33 7.32 7.31 7.30 7.29 7.28 7.27 7.26 7.25 7.24 7.23 7.22 7.21 7.20 7.19 7.18 7.17 7.16 7.15 7.14 7.13 7.12 7.11 7.10 7.09 7.08 7.07 7.06 7.05 7.04 7.03 7.02 7.01 7.00 6.99 6.98 6.97 6.96 6.95 6.94 6.93 6.92 6.91 6.90 6.89 6.88 6.87 6.86 6.85 6.84 6.83 6.82 6.81 6.80 6.79 6.78 6.77 6.76 6.75 6.74 6.73 6.72 6.71 6.70 6.69 6.68 6.67 6.66 6.65 6.64 6.63 6.62 6.61 6.60 6.59 6.58 6.57 6.56 6.55 6.54 6.53 6.52 6.51 6.50 6.49 6.48 6.47 6.46 6.45 6.44 6.43 6.42 6.41 6.40 6.39 6.38 6.37 6.36 6.35 6.34 6.33 6.32 6.31 6.30 6.29 6.28 6.27 6.26 6.25 6.24 6.23 6.22 6.21 6.20 6.19 6.18 6.17 6.16 6.15 6.14 6.13 6.12 6.11 6.10 6.09 6.08 6.07 6.06 6.05

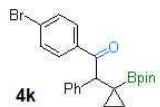

**4k** Ph Bpin  
(<sup>1</sup>H NMR, CDCl<sub>3</sub>, 300 MHz)

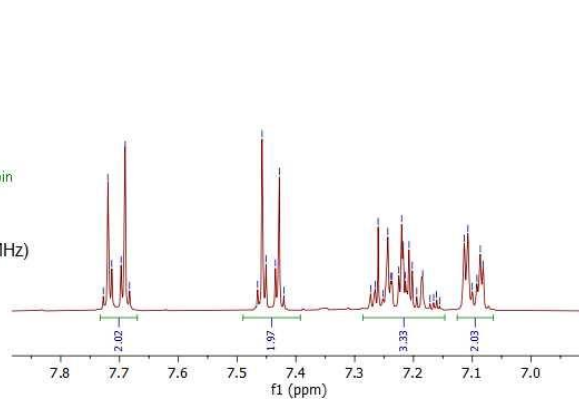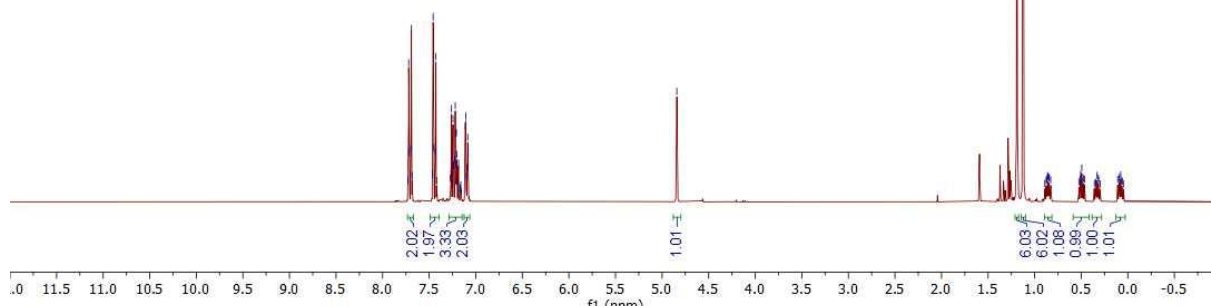

211112.334.11.fid — Fupeng Wu Ua-13 — Au13C CDCl3 {C:\Bruker\TopSpin3.6.2} 2111 34 — 75.48MHz

199.6 136.0 135.6 131.5 130.4 128.4 127.2 127.1 83.3 77.0 CDCl3 56.0 24.8 24.1 6.5 6.2

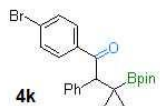

**4k** Ph Bpin  
(<sup>13</sup>C NMR, CDCl<sub>3</sub>, 75 MHz)

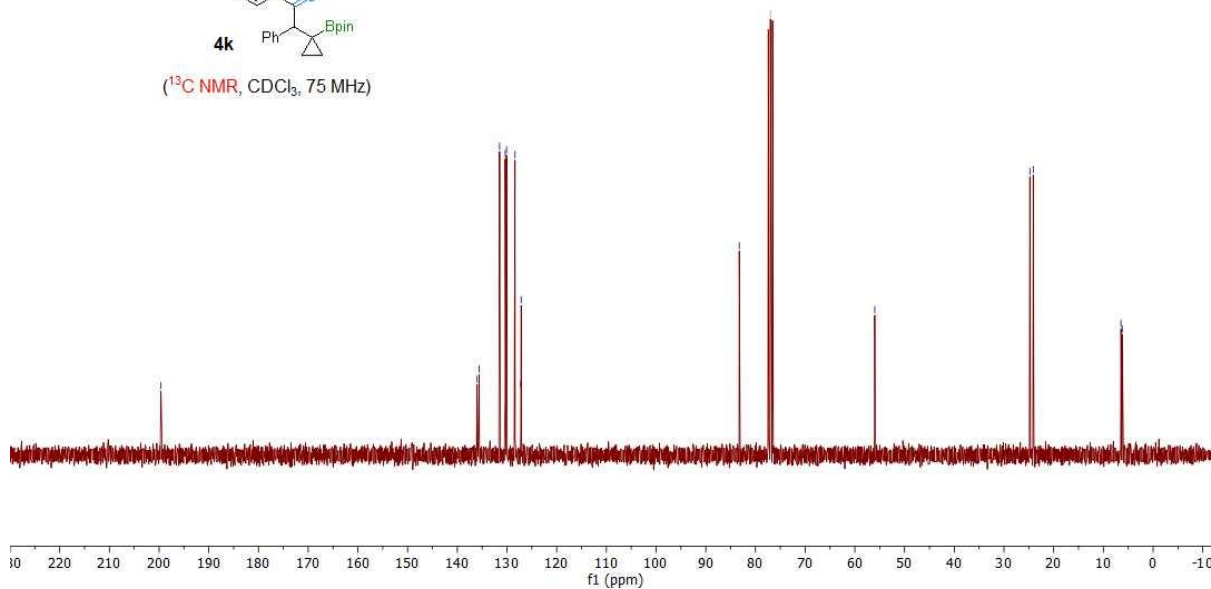

— 33.2

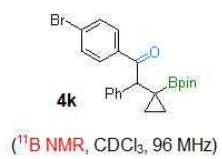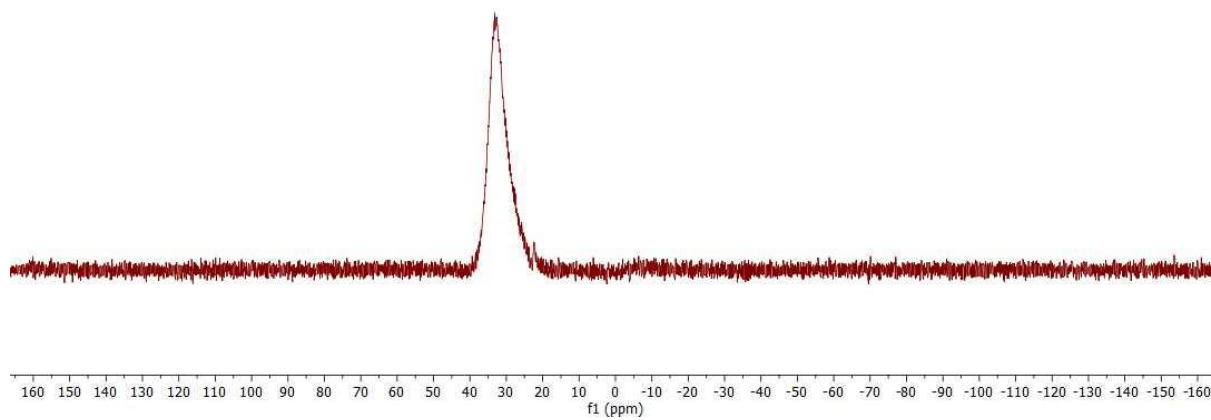



211111.301.10.fid — Fupeng Wu Ua-14 — Au1H CDCl3 {C:\Bruker\TopSpin3.6.2} 21111 1 — 300.13MHz

7.97  
7.97  
7.66  
7.64  
7.61  
7.41  
7.38  
7.31  
7.30  
7.29  
7.27  
7.27  
7.26  
7.26  
7.25  
7.24  
7.23  
7.23  
7.21  
7.19  
7.12  
7.11  
7.10  
7.10  
-4.85

1.22  
1.15  
0.93  
0.91  
0.90  
0.90  
0.89  
0.88  
0.88  
0.86  
0.86  
0.54  
0.52  
0.52  
0.51  
0.50  
0.49  
0.48  
0.38  
0.38  
0.35  
0.35  
0.34  
0.34  
0.33  
0.12  
0.11  
0.09  
0.09  
0.08  
0.08  
0.07  
0.06

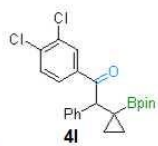

(<sup>1</sup>H NMR, CDCl<sub>3</sub>, 300 MHz)

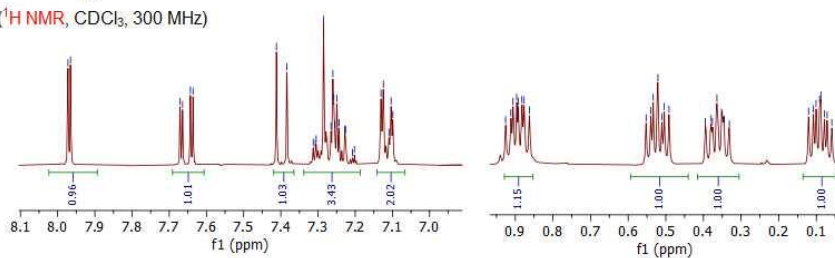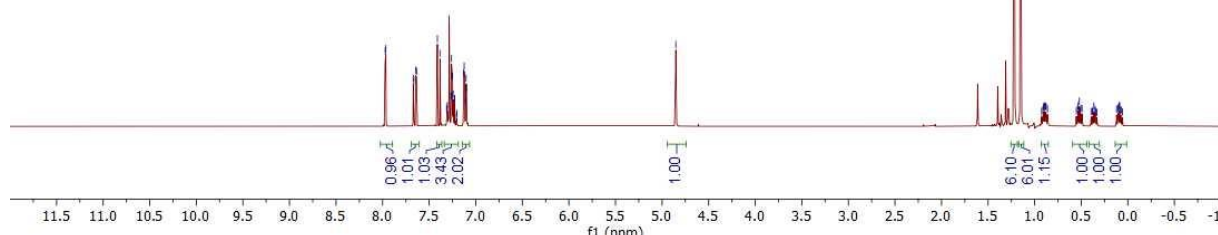

211111.301.11.fid — Fupeng Wu Ua-14 — Au13C CDCl3 {C:\Bruker\TopSpin3.6.2} 21111 1 — 75.48MHz

198.5

136.9  
136.6  
135.1  
132.8  
130.7  
130.3  
130.1  
128.5  
127.8  
127.3

83.4

77.0 CDCl3

56.0

24.8

24.1

6.5

6.2

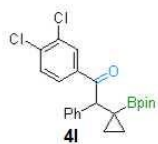

(<sup>13</sup>C NMR, CDCl<sub>3</sub>, 75 MHz)

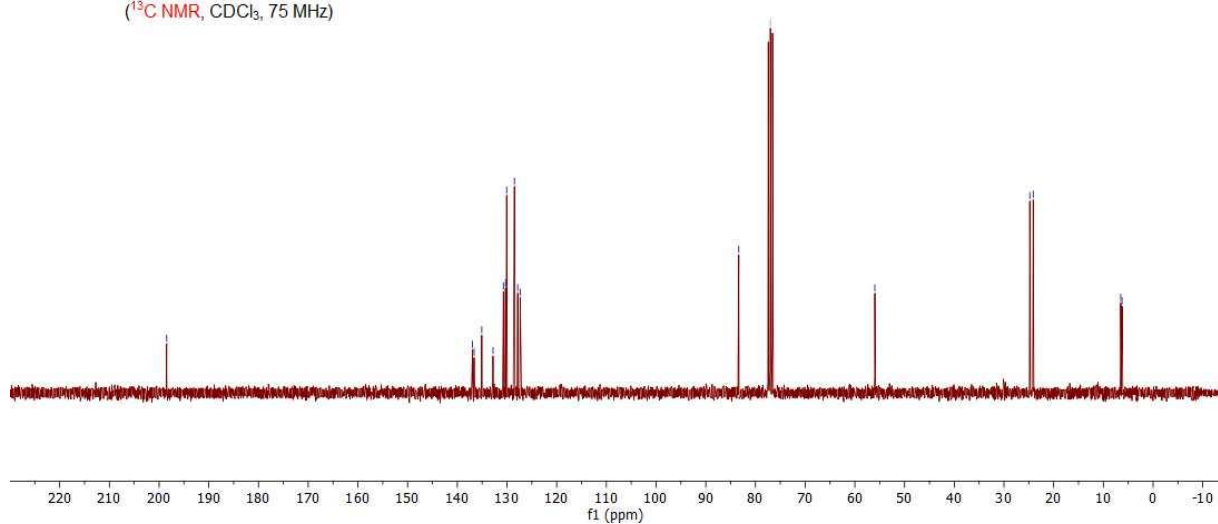

33.6

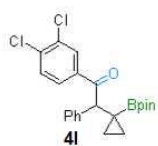

(<sup>11</sup>B NMR, CDCl<sub>3</sub>, 96 MHz)

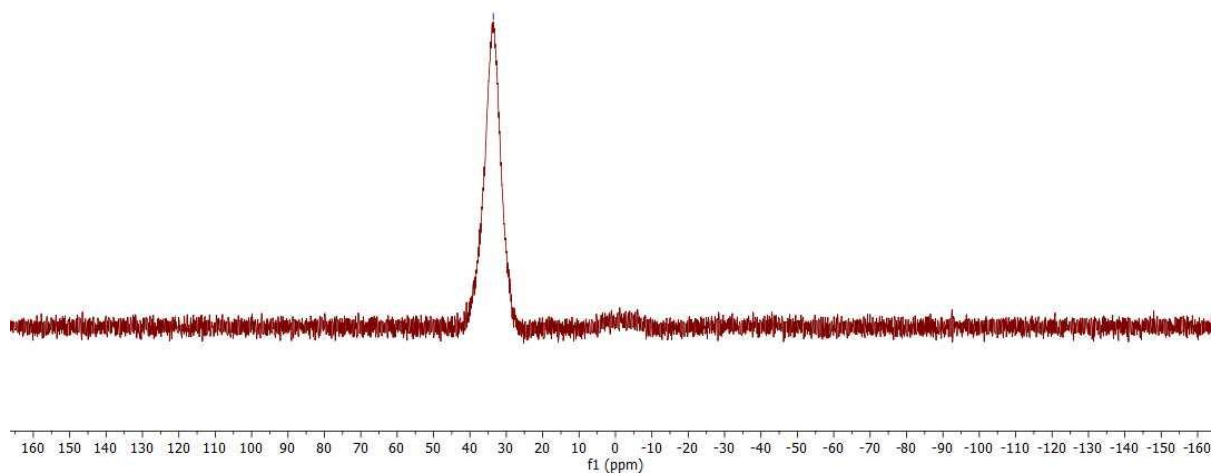

211111.305.10.fid — Fupeng Wu Ua-6 — Au1H CDCl3 {C:\Bruker\TopSpin3.6.2} 2111 5 — 300.13MHz

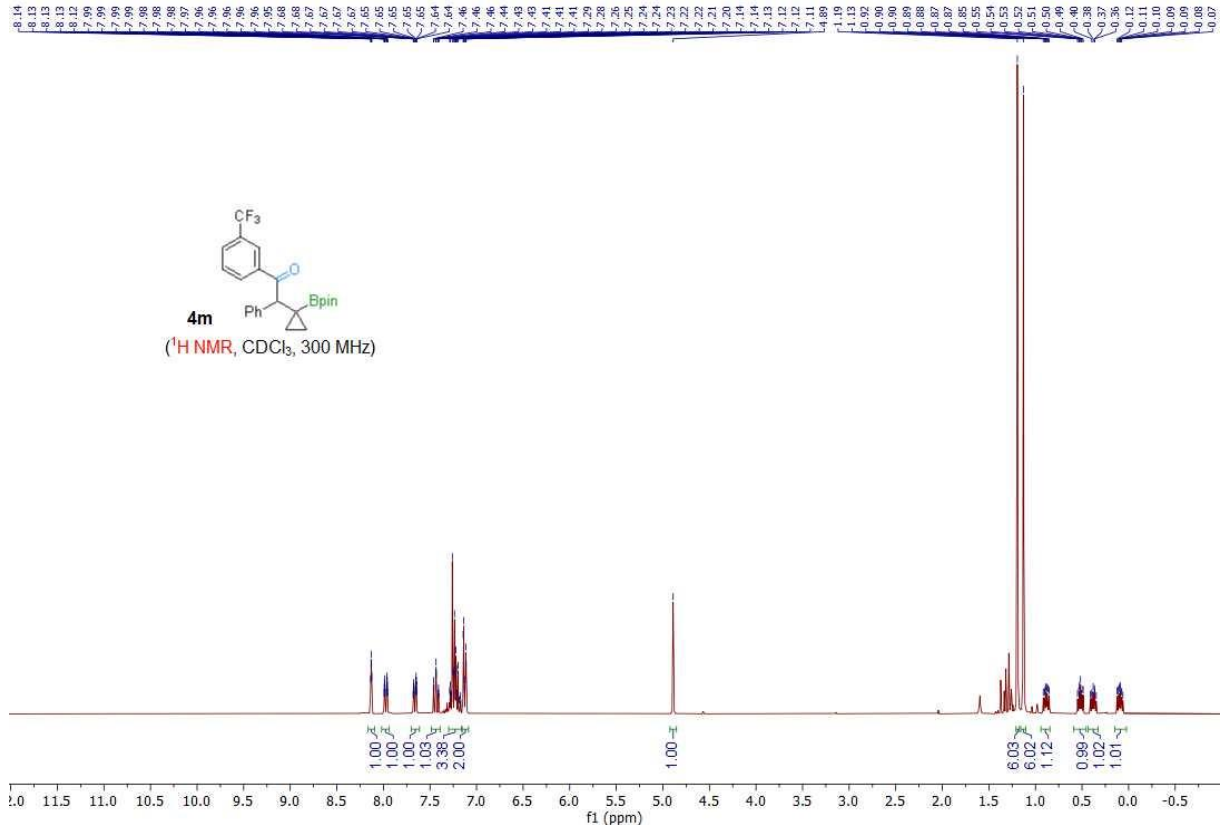

211111.305.11.fid — Fupeng Wu Ua-6 — Au13C CDCl3 {C:\Bruker\TopSpin3.6.2} 2111 5 — 75.48MHz

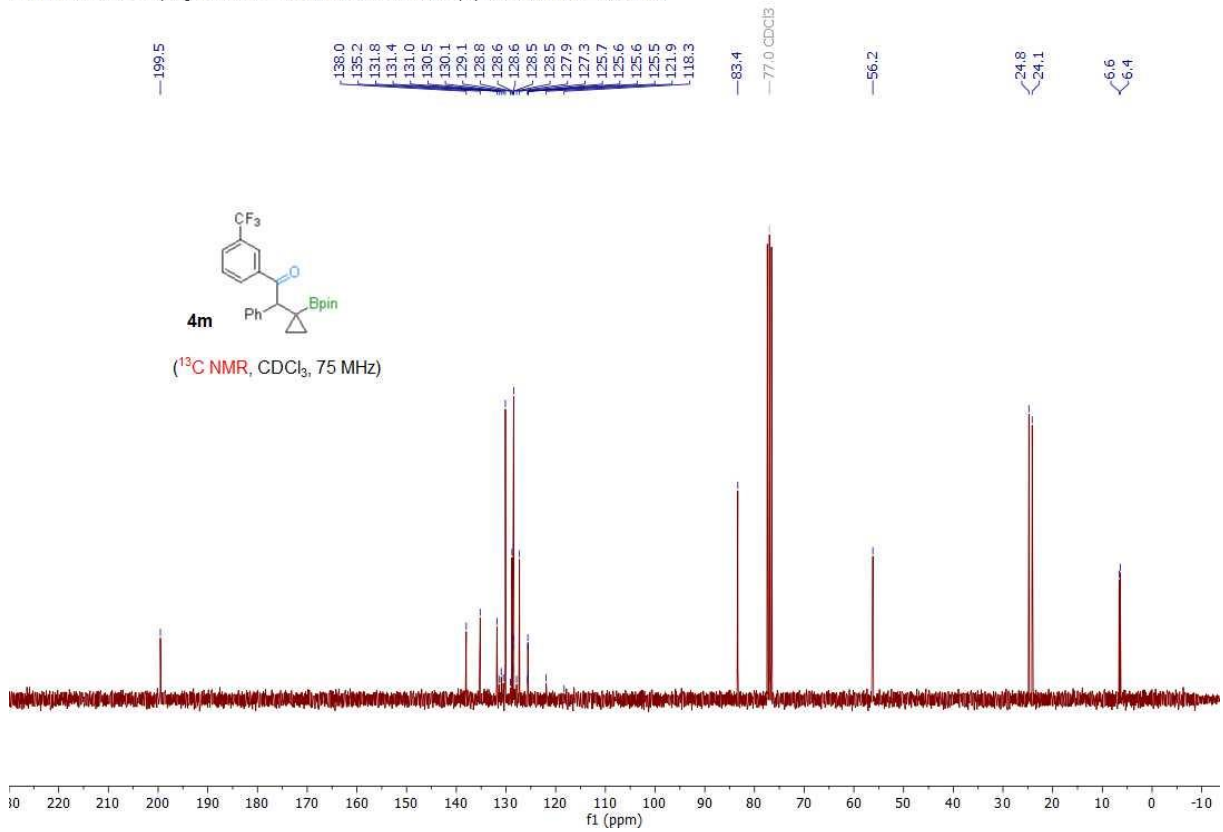

32.9

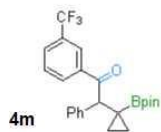

(<sup>11</sup>B NMR, CDCl<sub>3</sub>, 96 MHz)

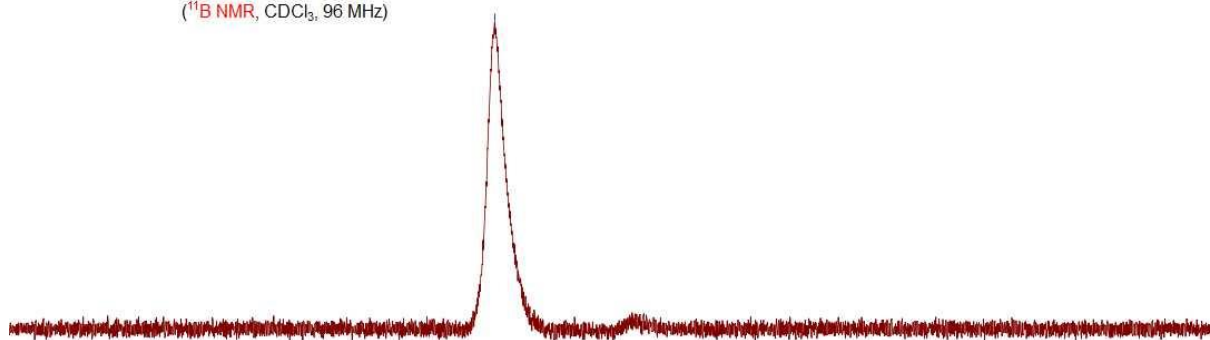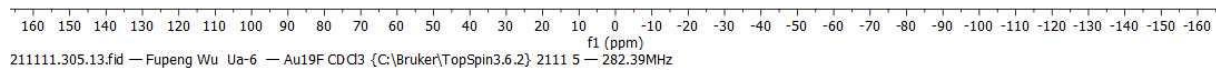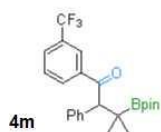

(<sup>19</sup>F NMR, CDCl<sub>3</sub>, 282 MHz)

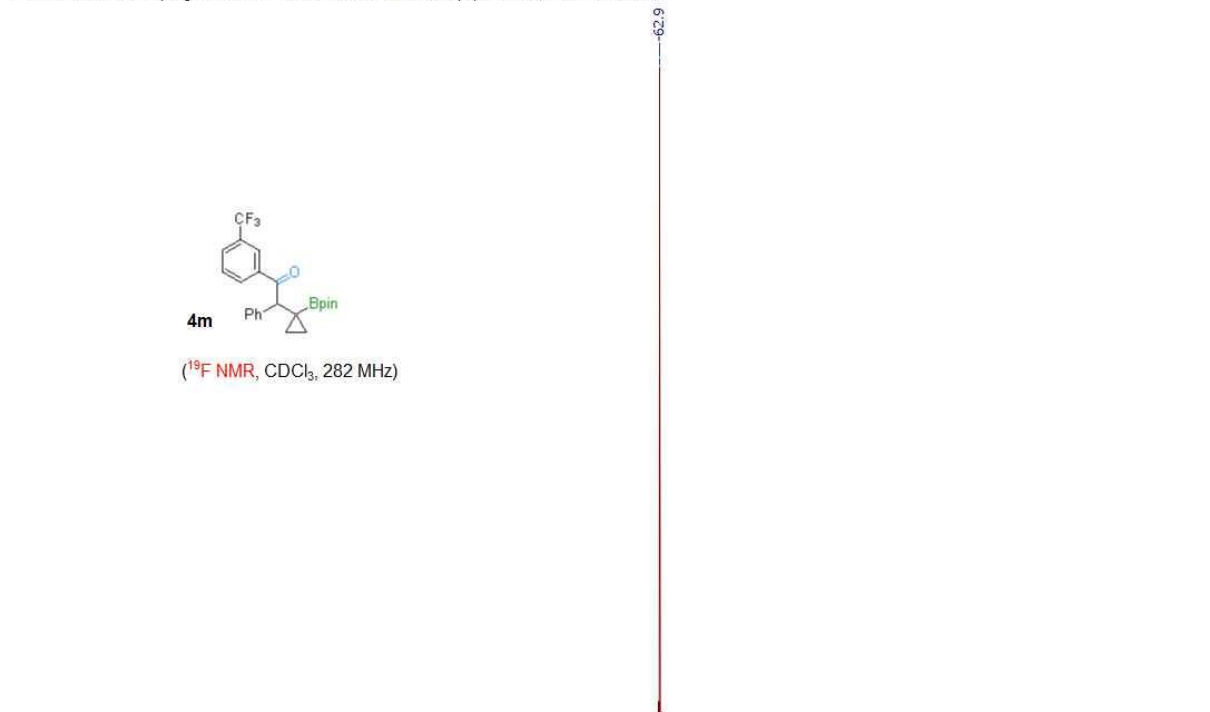

211116.338.10.fid — Fupeng Wu Ua-16 — Au1H CDCl3 {C:\Bruker\TopSpin3.6.2} 2111 38 — 300.13MHz

8.22, 8.22, 7.87, 7.86, 7.84, 7.83, 7.39, 7.38, 7.37, 7.36, 7.35, 7.34, 7.33, 7.32, 7.31, 7.30, 7.29, 7.28, 7.28, 7.28, 7.25, 7.25, 7.24, 7.23, 7.07, 7.06, 6.54, 6.54, 6.53, 6.53, 4.49, 4.32, 3.77, 3.77, 0.98, 0.97, 0.94, 0.94, 0.94, 0.92, 0.92, 0.87, 0.85, 0.84, 0.83, 0.81, 0.81, 0.79, 0.73, 0.71, 0.69, 0.66, 0.65, 0.59, 0.59, 0.57, 0.56, 0.55, 0.54

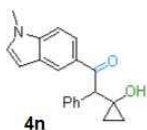

**4n**

(<sup>1</sup>H NMR, CDCl<sub>3</sub>, 300 MHz)

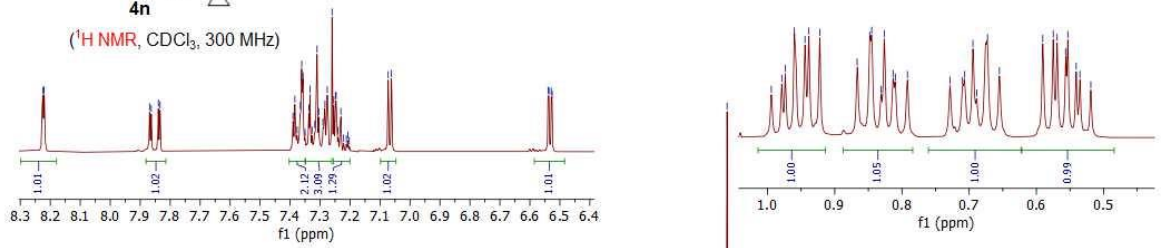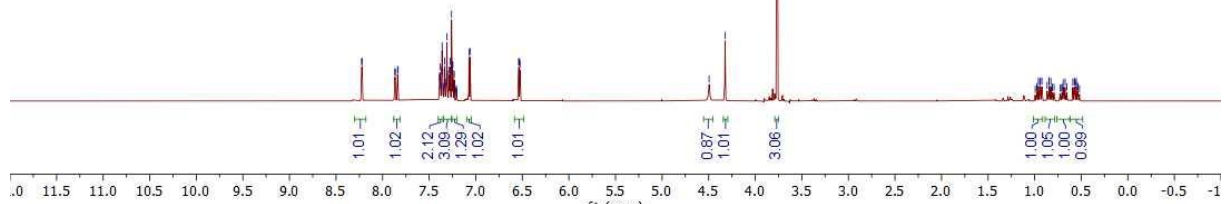

211112.332.11.fid — Fupeng Wu Ua-16 — Au13C CDCl3 {C:\Bruker\TopSpin3.6.2} 2111 32 — 75.48MHz

202.1, 139.2, 137.3, 130.5, 129.0, 128.7, 128.2, 127.9, 127.3, 124.0, 122.5, 109.2, 103.2, 77.0 CDCl3, 59.0, 57.6, 33.0, 13.4, 11.5

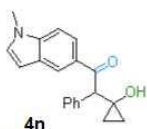

**4n**

(<sup>13</sup>C NMR, CDCl<sub>3</sub>, 75 MHz)

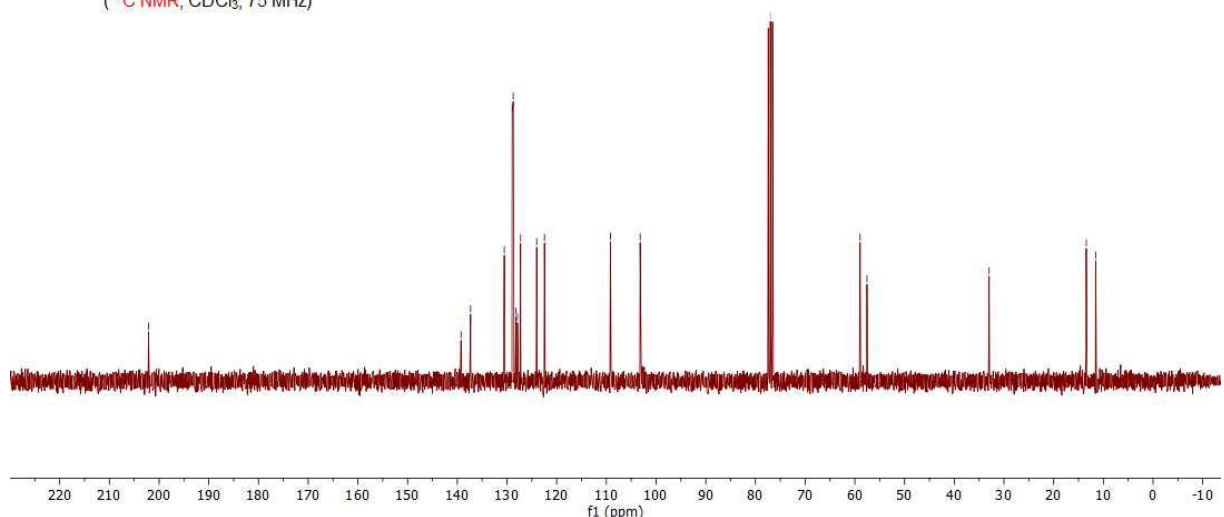

211202.f347.10.fid — Fupeng Wu Ua-23 — PROTON CDCl3 {C:\Bruker\TopSpin3.6.2} 2112 47 — 300.20MHz

7.89, 7.89, 7.88, 7.86, 7.85, 7.81, 7.80, 7.79, 7.78, 7.77, 7.72, 7.72, 7.71, 7.71, 7.41, 7.41, 7.39, 7.38, 7.38, 7.36, 7.35, 7.35, 7.34, 7.34, 7.30, 7.27, 7.27, 7.26, 7.25, 7.25, 7.24, 7.24, 7.22, 7.16, 7.14, 7.14, 6.68, 6.67, 6.67, 4.18, 4.18, 4.11, 4.11

1.06, 1.04, 1.04, 1.02, 1.01, 1.00, 0.99, 0.99, 0.89, 0.87, 0.85, 0.73, 0.69, 0.67, 0.65, 0.59, 0.57, 0.56, 0.54, 0.54, 0.52

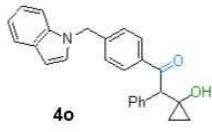

(<sup>1</sup>H NMR, CDCl<sub>3</sub>, 300 MHz)

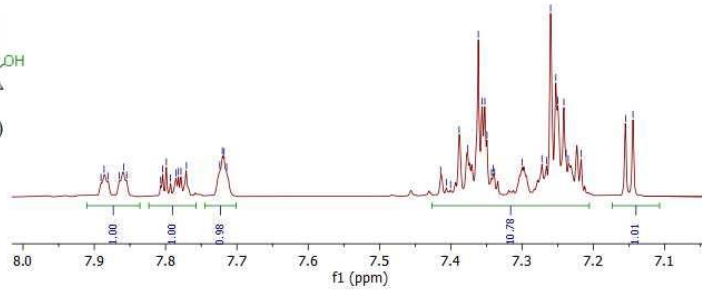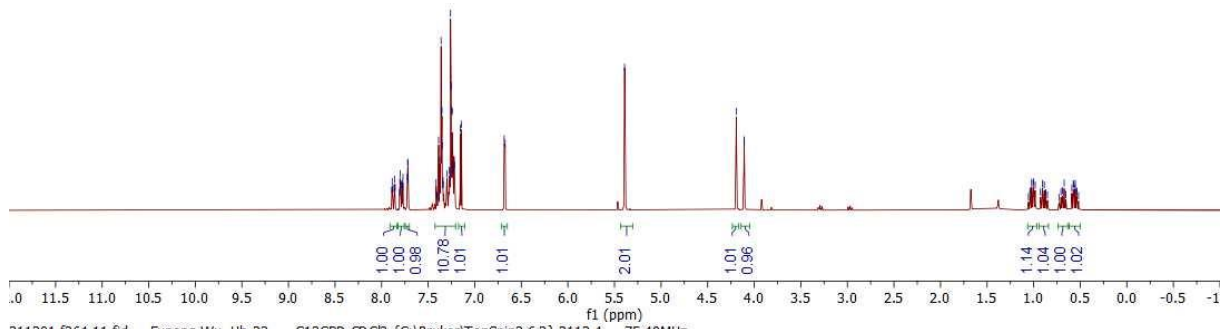

211201.f364.11.fid — Fupeng Wu Ub-23 — C13CPD CDCl3 {C:\Bruker\TopSpin3.6.2} 2112 4 — 75.49MHz

-201.3

138.2, 136.4, 136.0, 131.4, 129.1, 129.0, 128.9, 128.1, 128.0, 127.5, 127.1, 121.9, 121.1, 119.7, 109.4

-77.0 CDCl3

-59.7, -57.0, -49.6

-13.1, -11.4

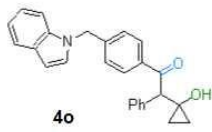

(<sup>13</sup>C NMR, CDCl<sub>3</sub>, 75 MHz)

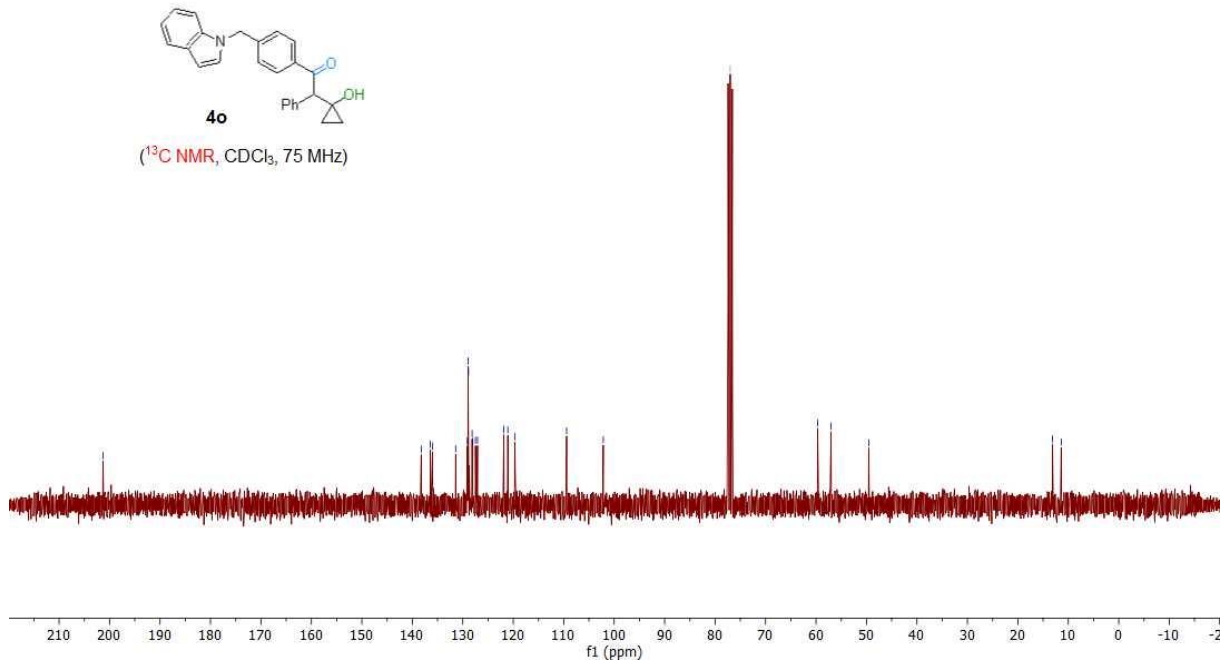

211122.f336.10.fid — Fupeng Wu Ua-21 — PROTON CDCl3 {C:\Bruker\TopSpin3.6.2} 2111 36 — 300.20MHz

7.78, 7.77, 7.75, 7.74, 7.73, 7.72, 7.71, 7.70, 7.69, 7.68, 7.67, 7.66, 7.65, 7.21, 7.20, 7.19, 7.18, 7.17, 7.16, 7.15, 7.14, 7.13, 7.12, 7.11, 7.10, 6.70, 6.69, 6.68, 6.67, 6.66, 6.65, 4.80, 4.21, 4.21, 4.19, 4.18, 4.18, 4.16, 4.14, 4.14, 1.59, 1.59, 1.18, 1.17, 1.17, 1.15, 1.14, 1.13, 1.12, 0.84, 0.83, 0.82, 0.82, 0.81, 0.80, 0.79, 0.51, 0.51, 0.50, 0.49, 0.49, 0.47, 0.47, 0.34, 0.33, 0.31, 0.29, 0.14, 0.13, 0.12, 0.10, 0.09, 0.08

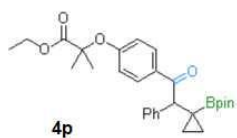

(<sup>1</sup>H NMR, CDCl<sub>3</sub>, 300 MHz)

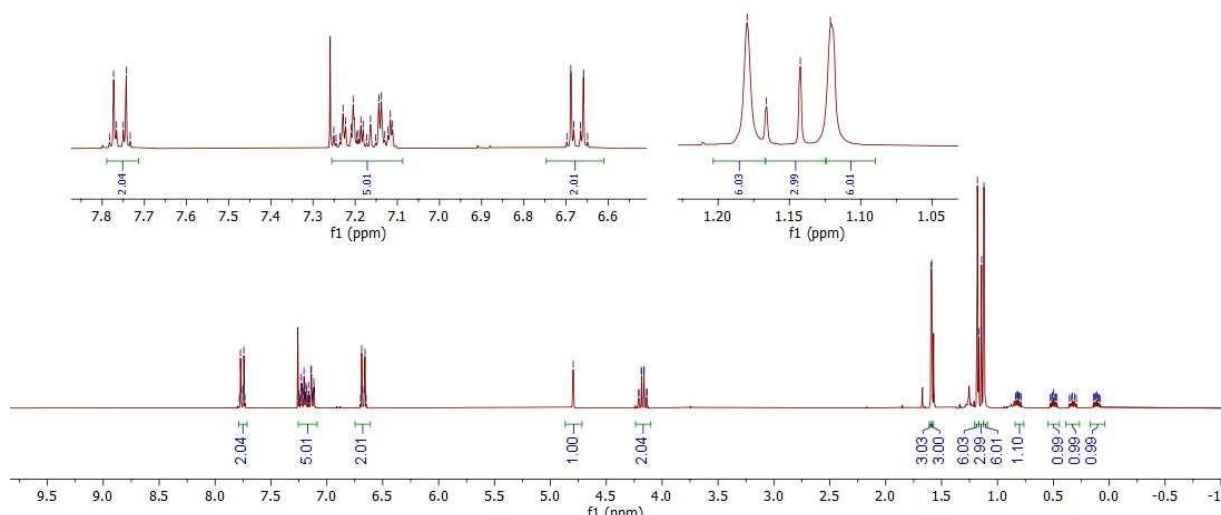

211124.326.10.fid — Fupeng Wu Ua-21 — Au13C CDCl3 {C:\Bruker\TopSpin3.6.2} 2111 26 — 75.48MHz

199.1, 173.8, 158.9, 136.6, 130.8, 130.6, 130.1, 128.2, 126.8, 117.0, 83.1, 79.1, 77.0 CDCl3, 61.6, 55.9, 25.4, 25.3, 24.7, 24.1, 13.9, 6.5, 6.3

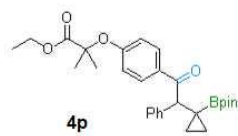

(<sup>13</sup>C NMR, CDCl<sub>3</sub>, 75 MHz)

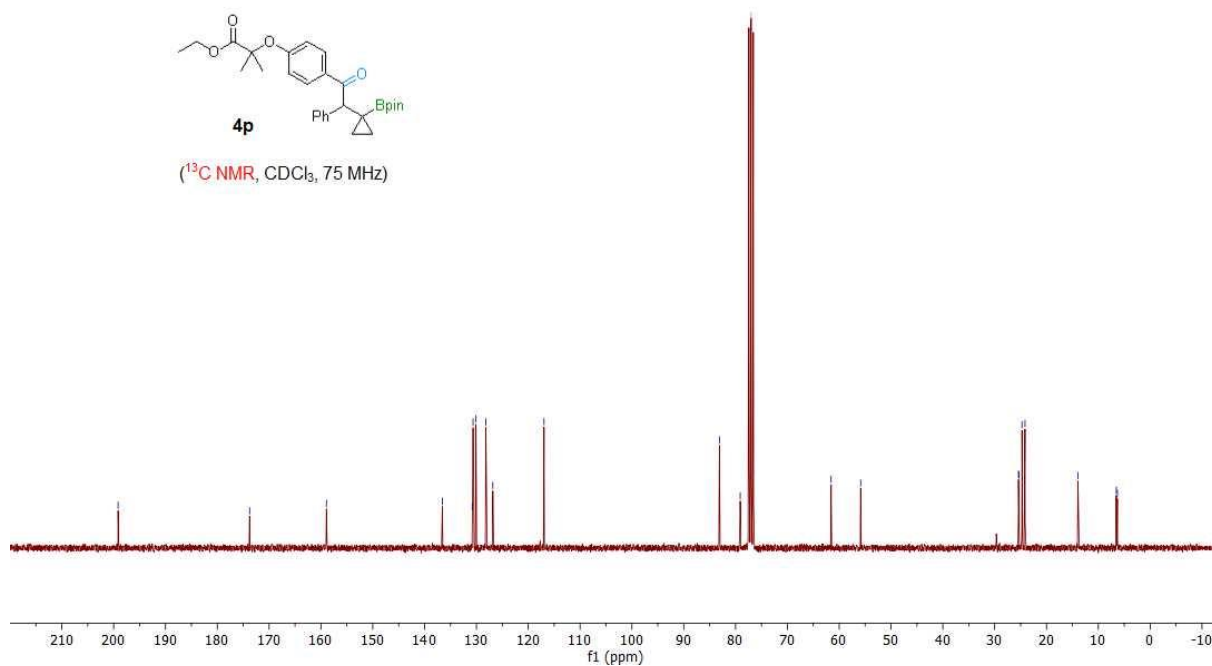

—34.4

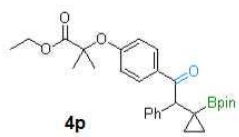

**4p**

(<sup>11</sup>B NMR, CDCl<sub>3</sub>, 96 MHz)

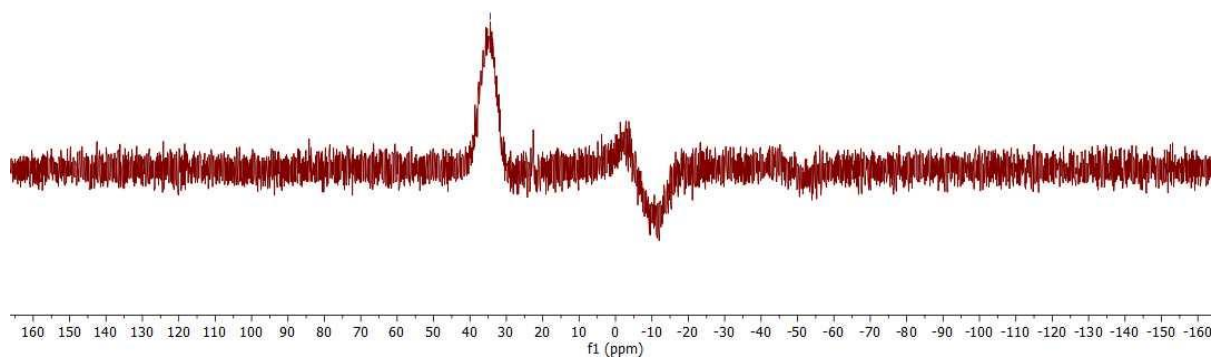



211203.334.10.fid — Fupeng Wu Ua-24 — Au1H CDCl3 {C:\Bruker\TopSpin3.6.2} 2112 34 — 300.13MHz

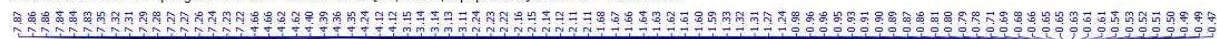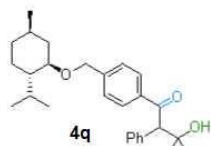

(<sup>1</sup>H NMR, CDCl<sub>3</sub>, 300 MHz)

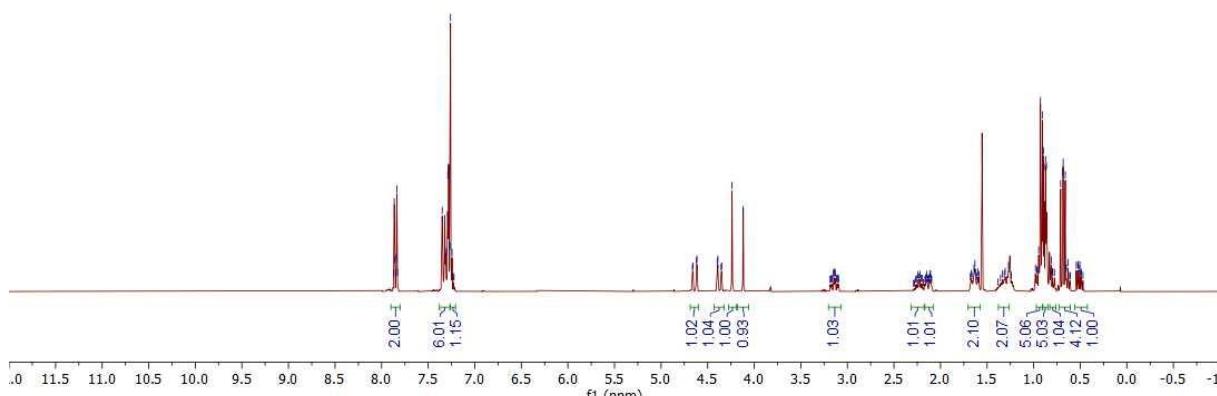

211118.345.11.fid — Fupeng Wu Ua-24 — Au13C CDCl3 {C:\Bruker\TopSpin3.6.2} 2111 45 — 75.48MHz

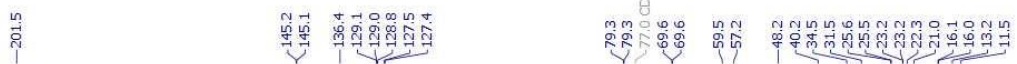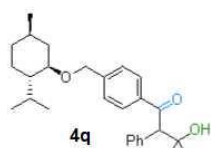

(<sup>13</sup>C NMR, CDCl<sub>3</sub>, 75 MHz)

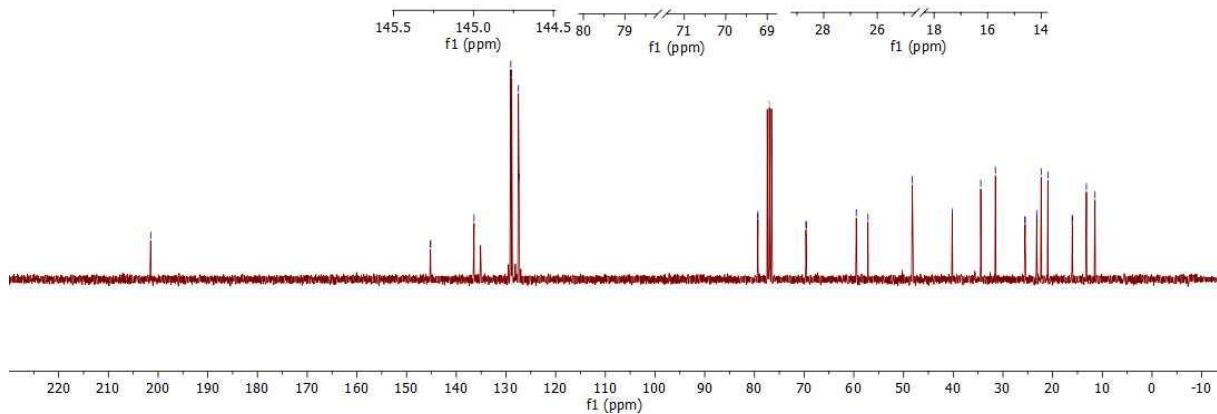

211118.348.10.fid — Fupeng Wu Ua-29 — Au1H CDCl3 {C:\Bruker\TopSpin3.6.2} 2111 48 — 300.13MHz

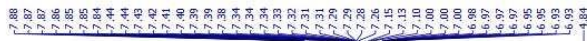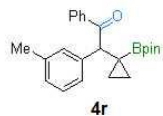

(<sup>1</sup>H NMR, CDCl<sub>3</sub>, 300 MHz)

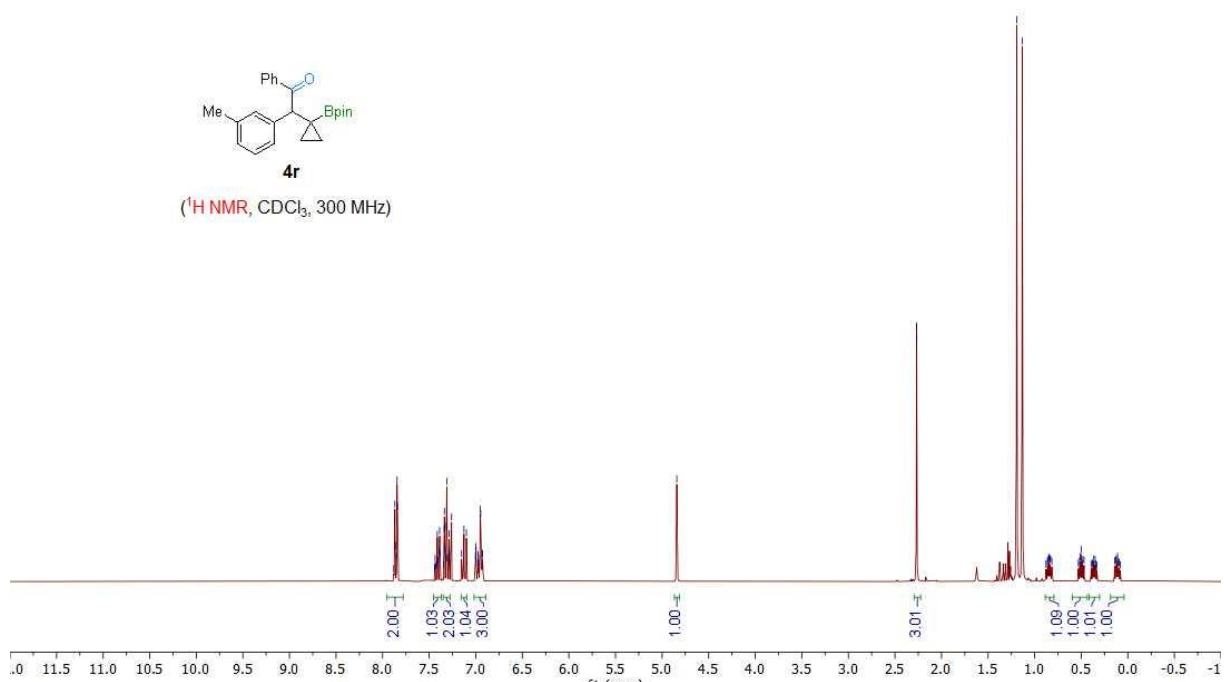

211118.348.11.fid — Fupeng Wu Ua-29 — Au13C CDCl3 {C:\Bruker\TopSpin3.6.2} 2111 48 — 75.48MHz

-200.7

137.7  
137.4  
135.9  
132.1  
130.7  
128.8  
128.1  
128.1  
127.7  
127.3

-83.1  
-77.0 CDCl<sub>3</sub>

-56.1

24.8  
24.2  
21.4

6.6  
6.4

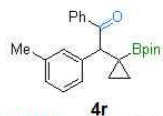

(<sup>13</sup>C NMR, CDCl<sub>3</sub>, 75 MHz)

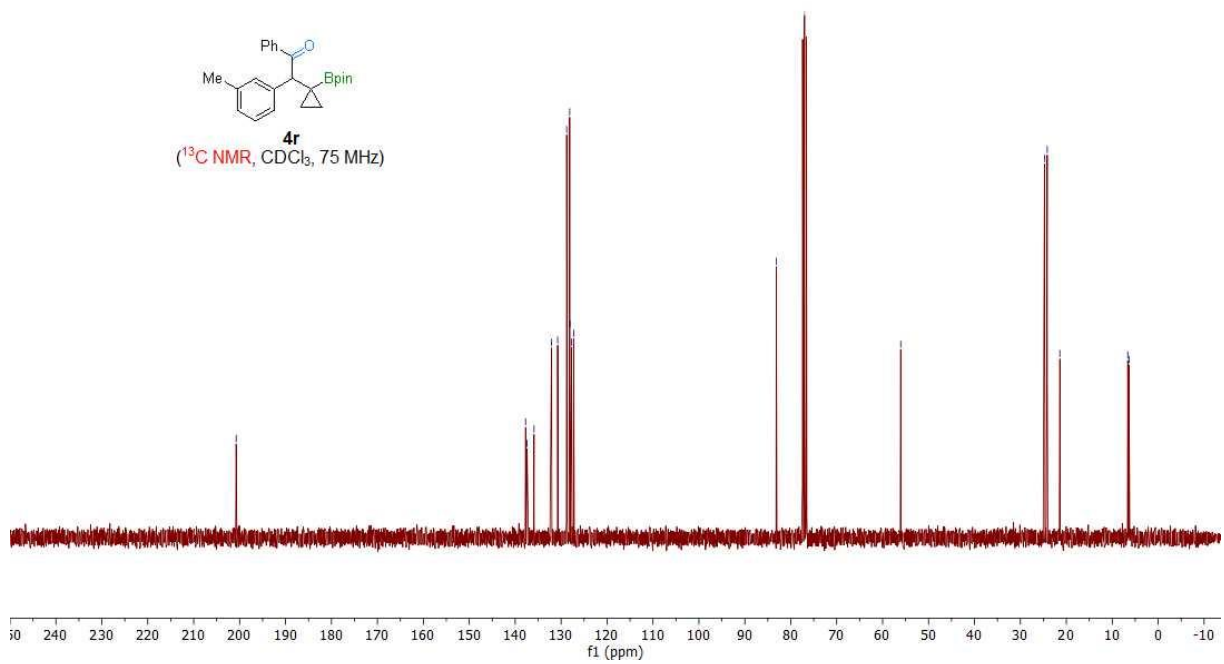

— 33.15

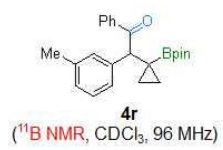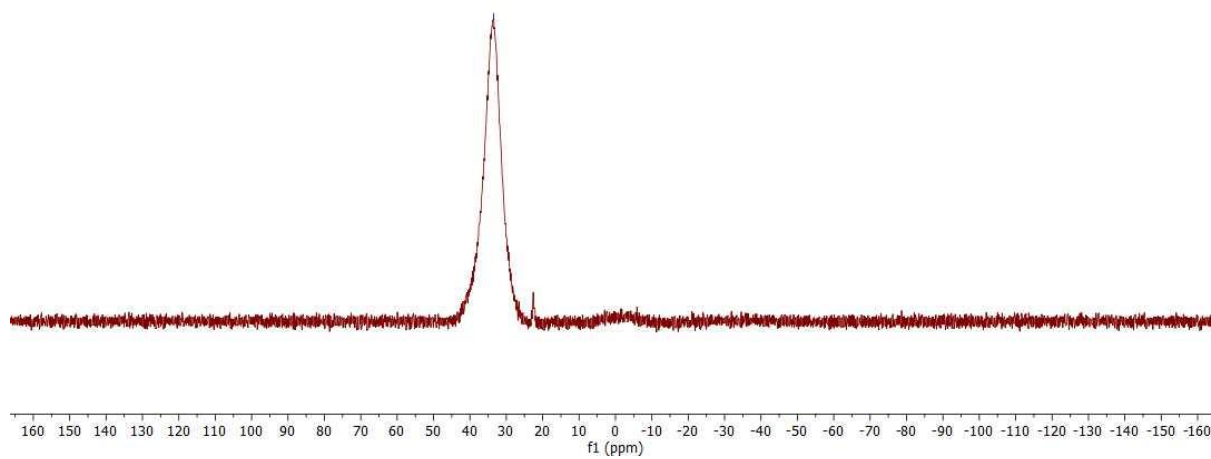

211116.339.10.fid — Fupeng Wu Ua-25 — Au1H CDCl3 {C:\Bruker\TopSpin3.6.2} 2111 39 — 300.13MHz

7.87  
7.86  
7.85  
7.84  
7.83  
7.44  
7.43  
7.41  
7.40  
7.38  
7.34  
7.33  
7.32  
7.31  
7.29  
7.28  
7.26  
7.25  
7.24  
7.23  
7.04  
7.04  
7.03  
7.02  
7.01  
7.00  
6.99  
6.98  
4.88  
2.37  
1.85  
1.83  
1.81  
1.79  
1.76  
1.74  
1.72  
1.19  
1.13  
0.88  
0.85  
0.85  
0.83  
0.82  
0.81  
0.51  
0.49  
0.48  
0.47  
0.46  
0.36  
0.36  
0.35  
0.33  
0.31  
0.14  
0.12  
0.10  
0.09  
0.08

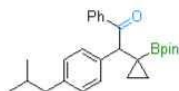

**4s**

(<sup>1</sup>H NMR, CDCl<sub>3</sub>, 300 MHz)

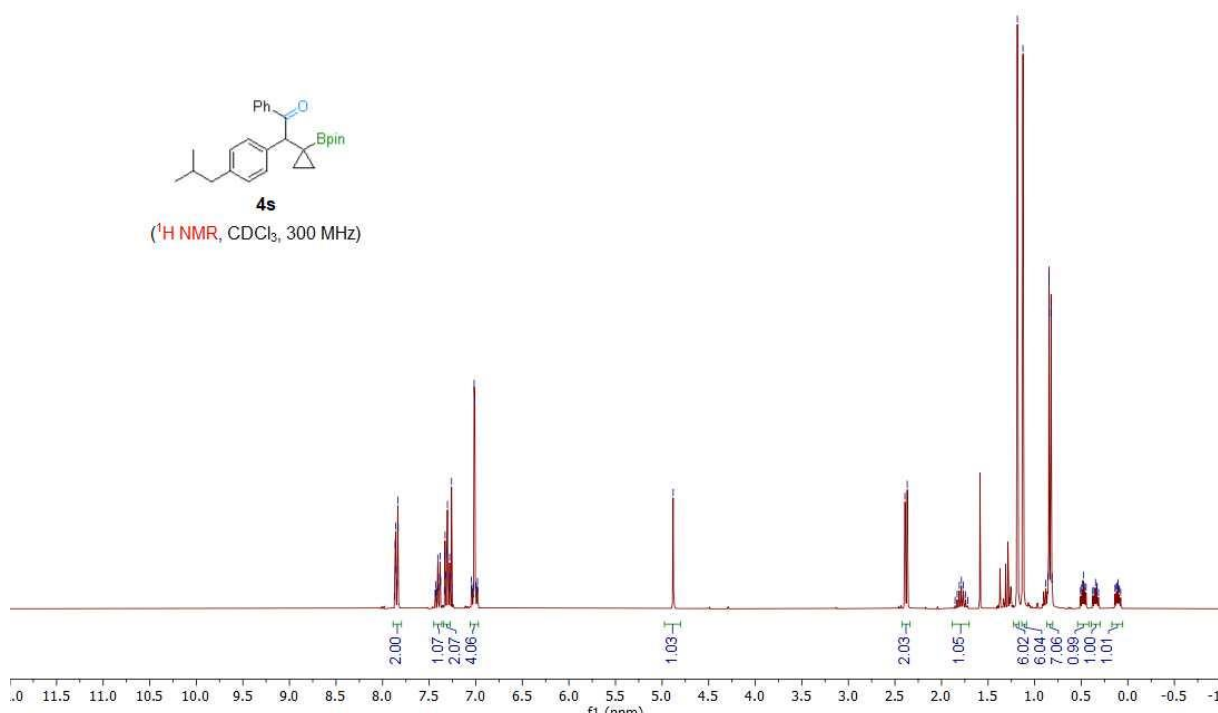

211118.346.10.fid — Fupeng Wu Ua-25 — Au13C CDCl3 {C:\Bruker\TopSpin3.6.2} 2111 46 — 75.48MHz

200.8  
140.3  
137.4  
133.1  
132.0  
129.9  
129.0  
128.8  
128.1  
83.2  
77.0 CDCl3  
55.6  
45.0  
30.1  
24.8  
24.1  
22.3  
6.5  
6.1

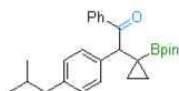

**4s**

(<sup>13</sup>C NMR, CDCl<sub>3</sub>, 75 MHz)

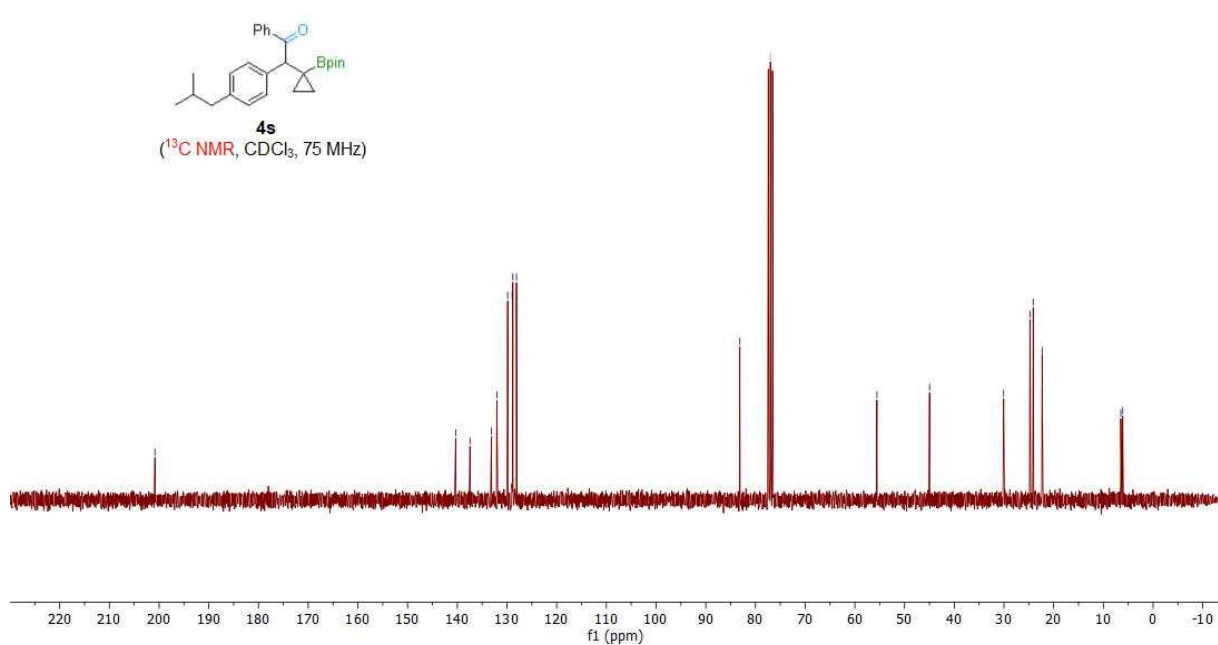

33.6

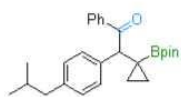

**4s**

(<sup>11</sup>B NMR, CDCl<sub>3</sub>, 96 MHz)

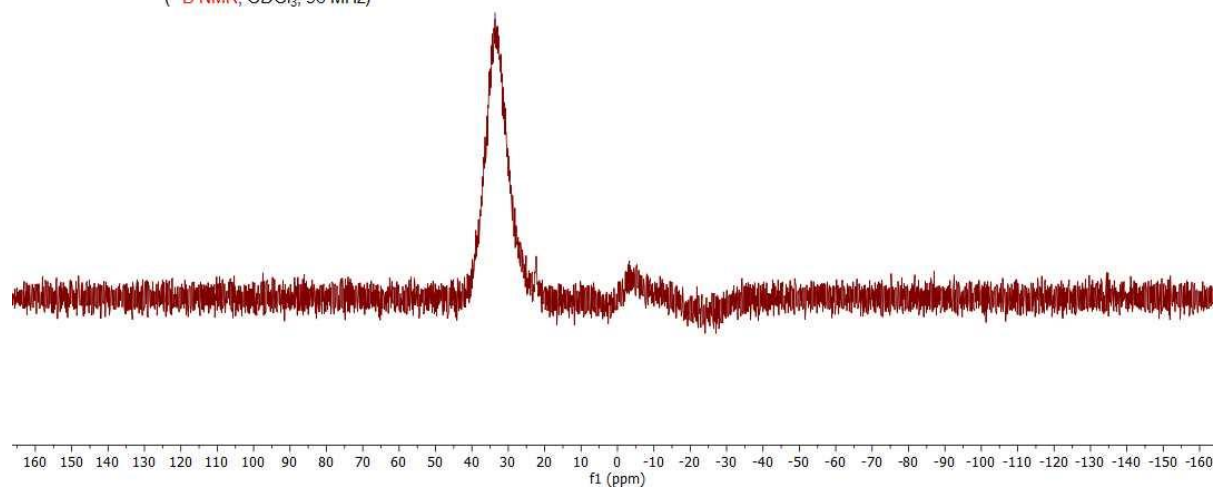

211118.347.10.fid — Fupeng Wu Ua-28 — Au1H CDCl3 {C:\Bruker\TopSpin3.6.2} 2111 47 — 300.13MHz

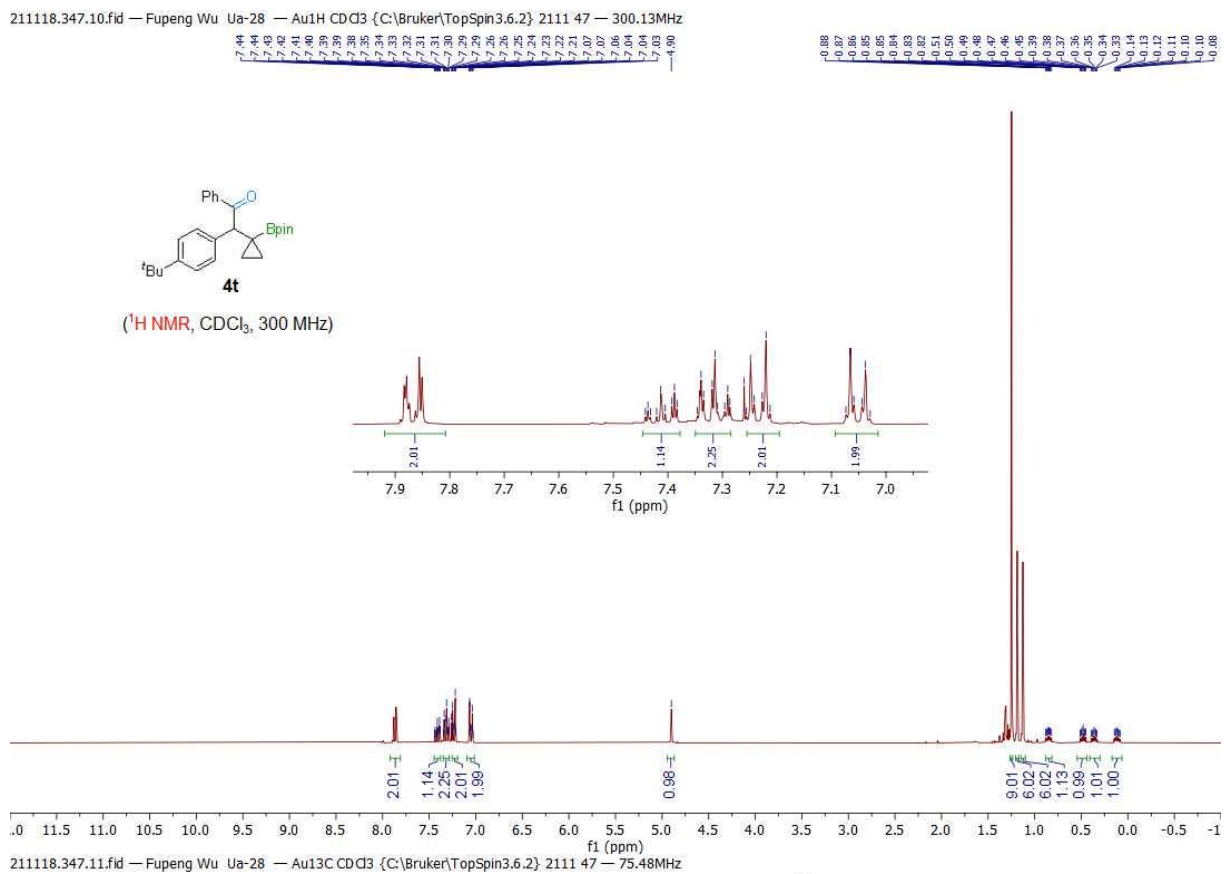

211118.347.11.fid — Fupeng Wu Ua-28 — Au13C CDCl3 {C:\Bruker\TopSpin3.6.2} 2111 47 — 75.48MHz

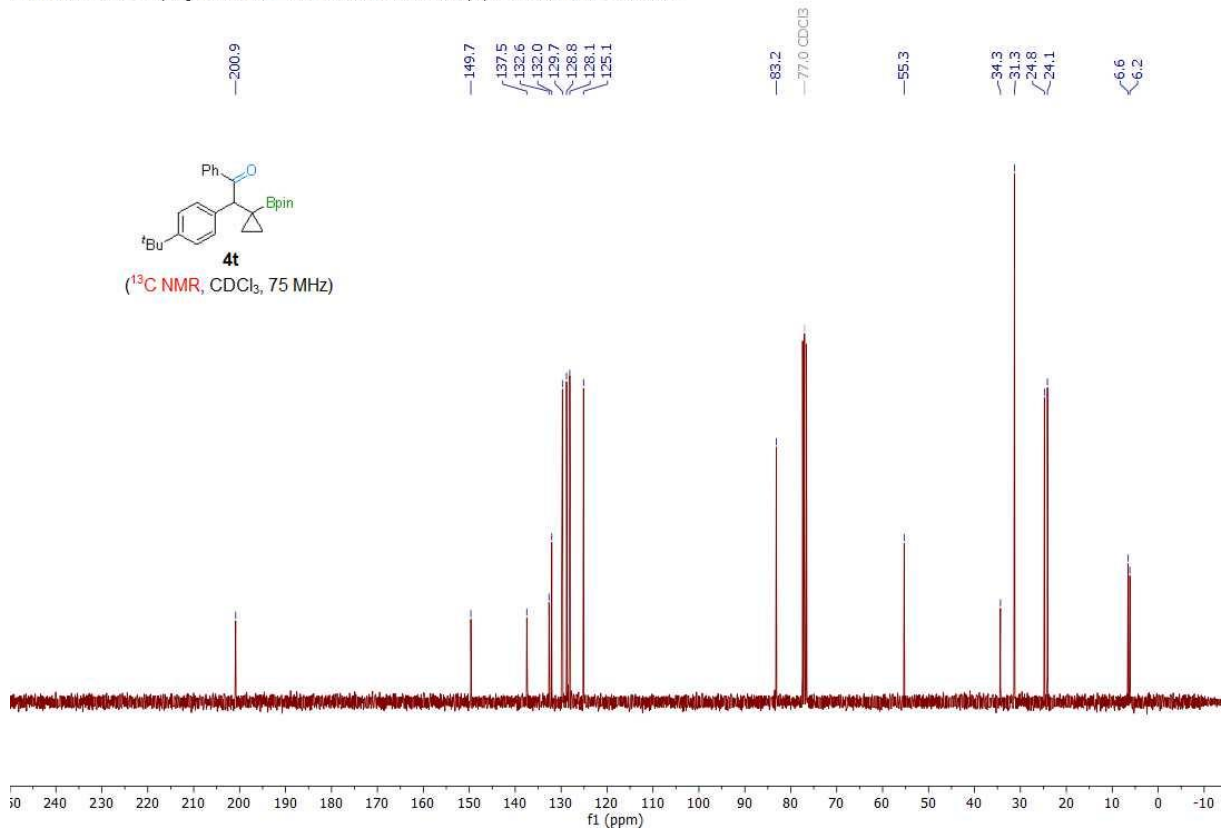

— 32.9

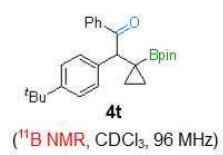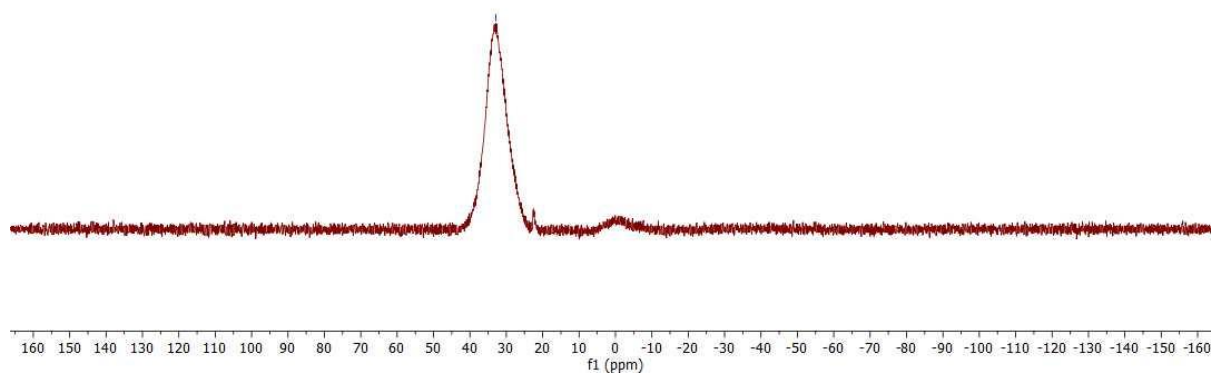

211130.f357.10.fid — Fupeng Wu Ua-38 — PROTON CDCl3 {C:\Bruker\TopSpin3.6.2} 2111 57 — 300.20MHz

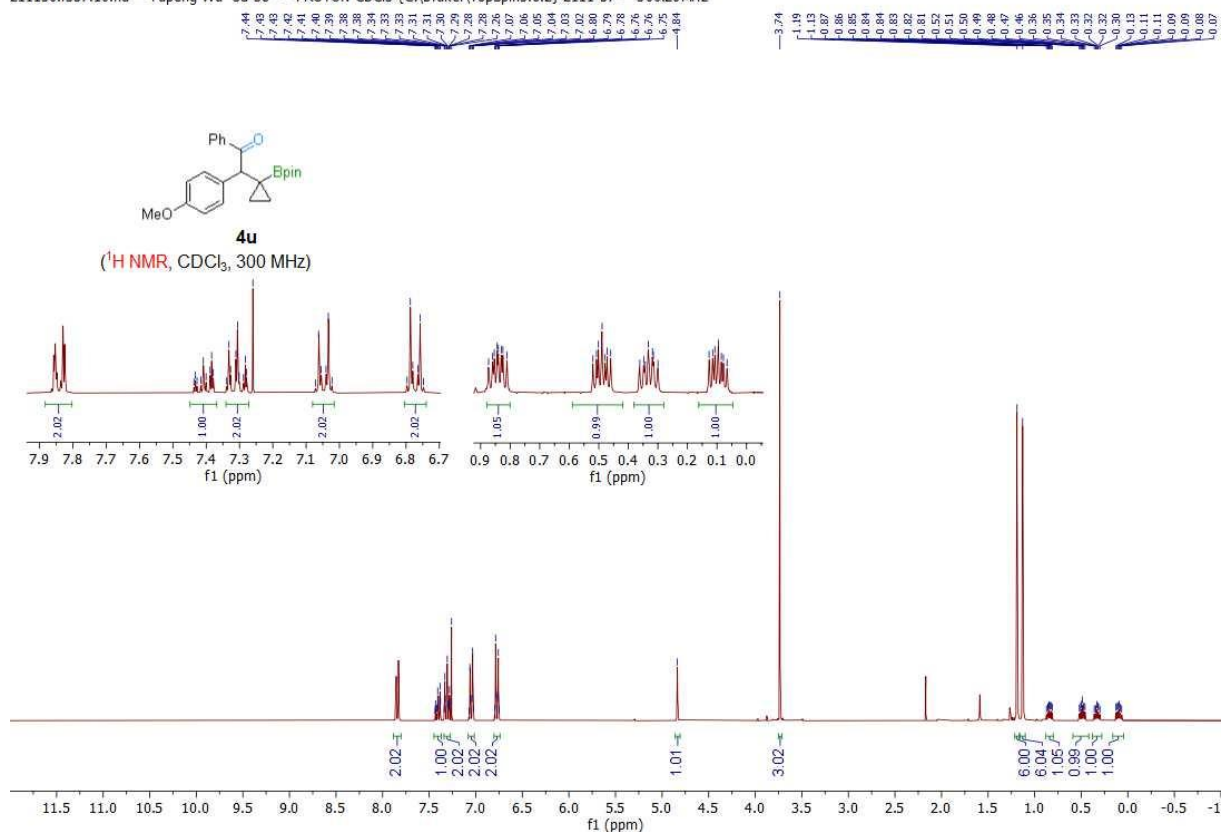

211129.451.12.fid — Fupeng Wu Ua-38 — Au13C CDCl3 {C:\Bruker\TopSpin3.5pl6} 2111 51 — 100.63MHz

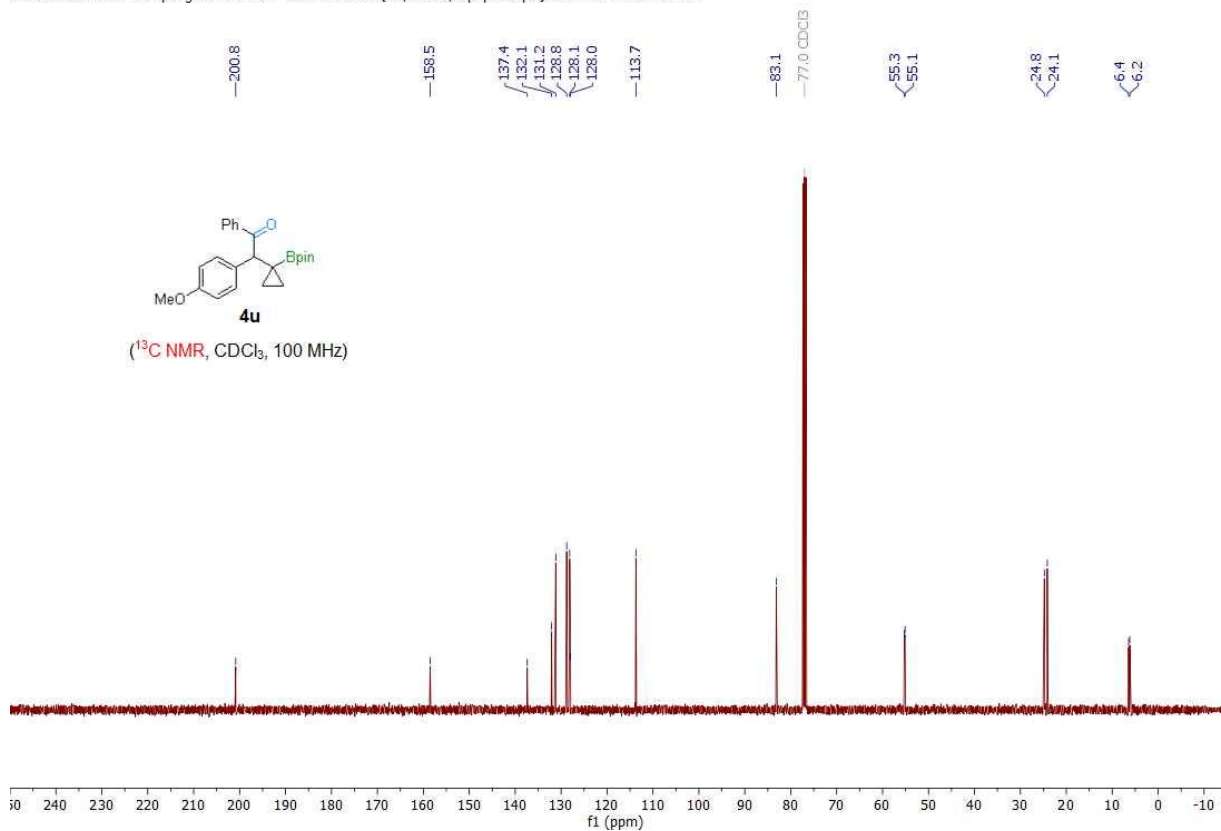



— 33.1

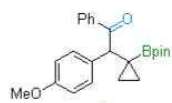

**4u**

(<sup>11</sup>B NMR, CDCl<sub>3</sub>, 128 MHz)

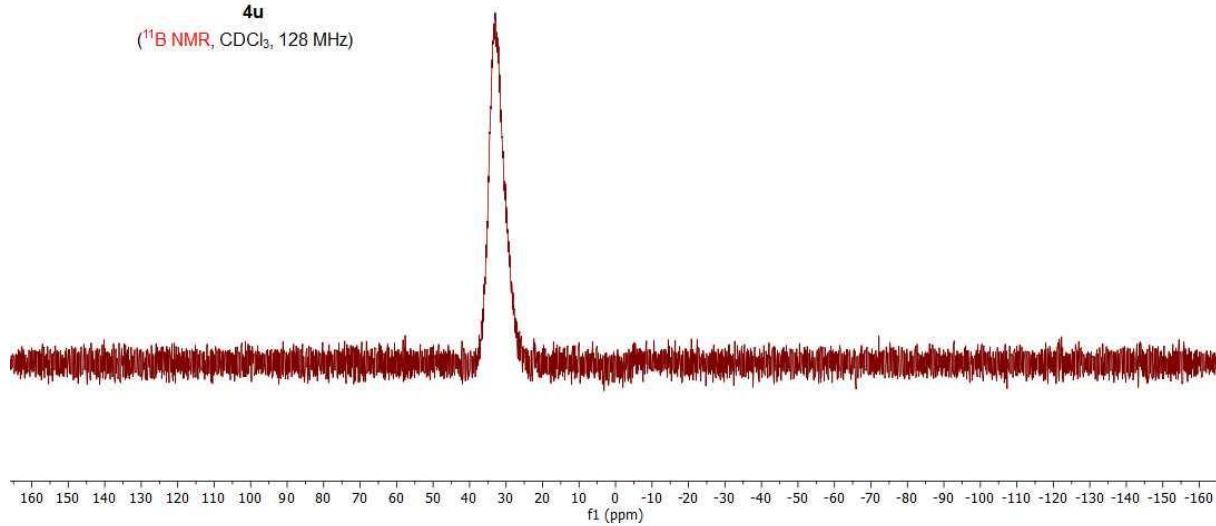

211111.303.10.fid — Fupeng Wu Ua-18 — Au1H CDCl3 {C:\Bruker\TopSpin3.6.2} 2111 3 — 300.13MHz

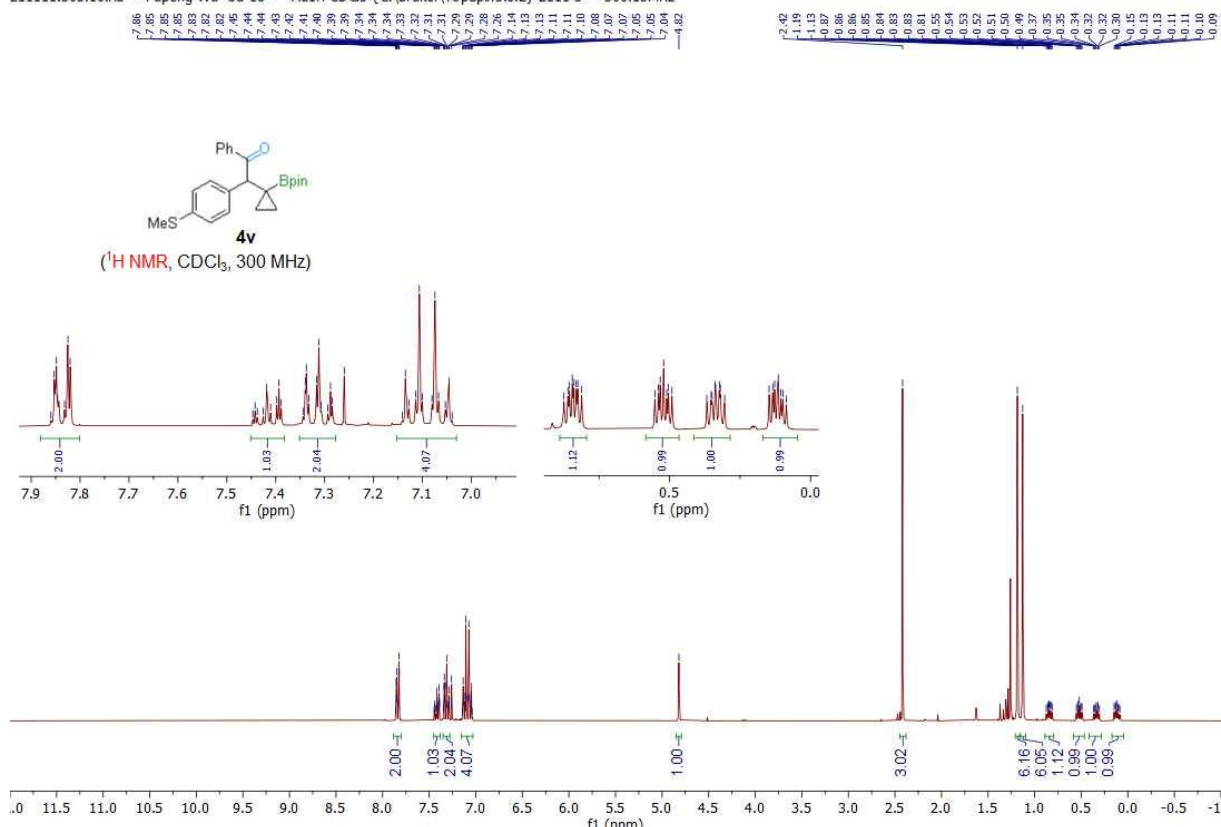

211111.303.11.fid — Fupeng Wu Ua-18 — Au13C CDCl3 {C:\Bruker\TopSpin3.6.2} 2111 3 — 75.48MHz

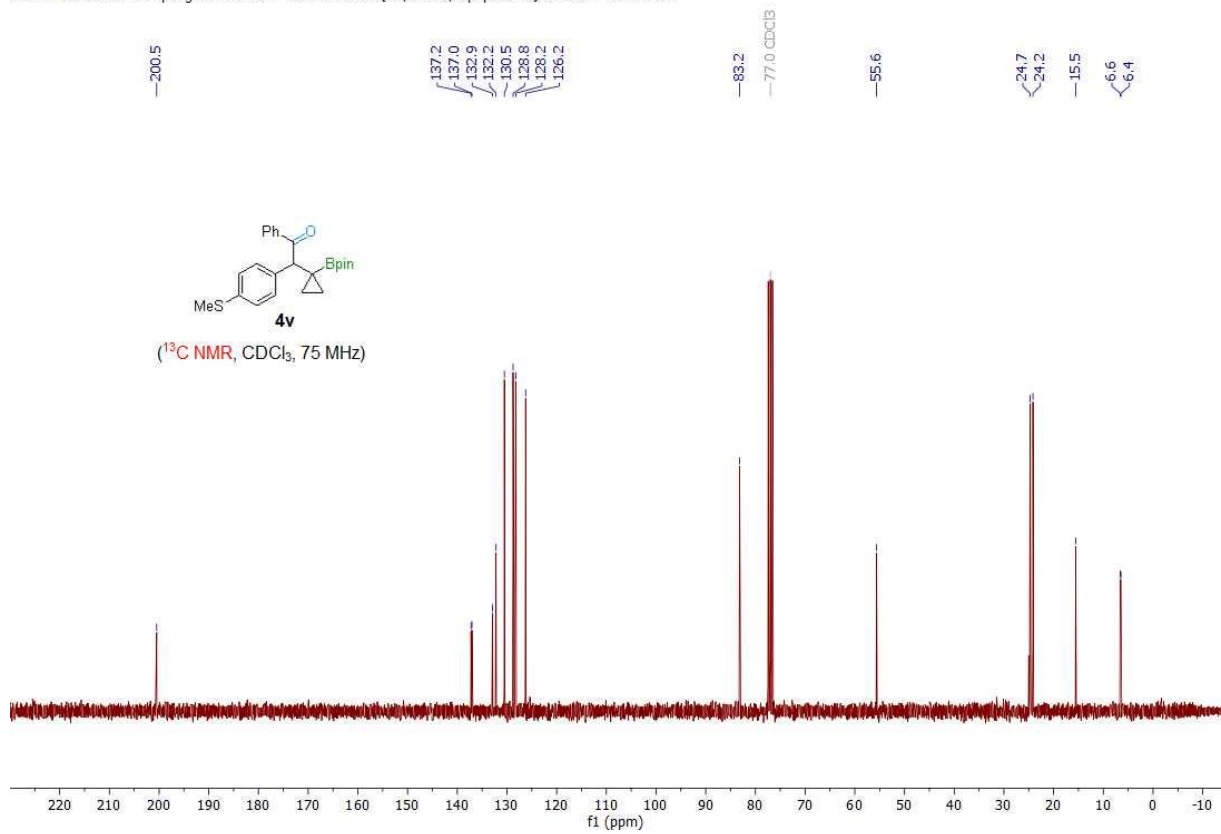

—33.1

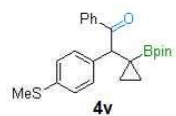

(<sup>11</sup>B NMR, CDCl<sub>3</sub>, 96 MHz)

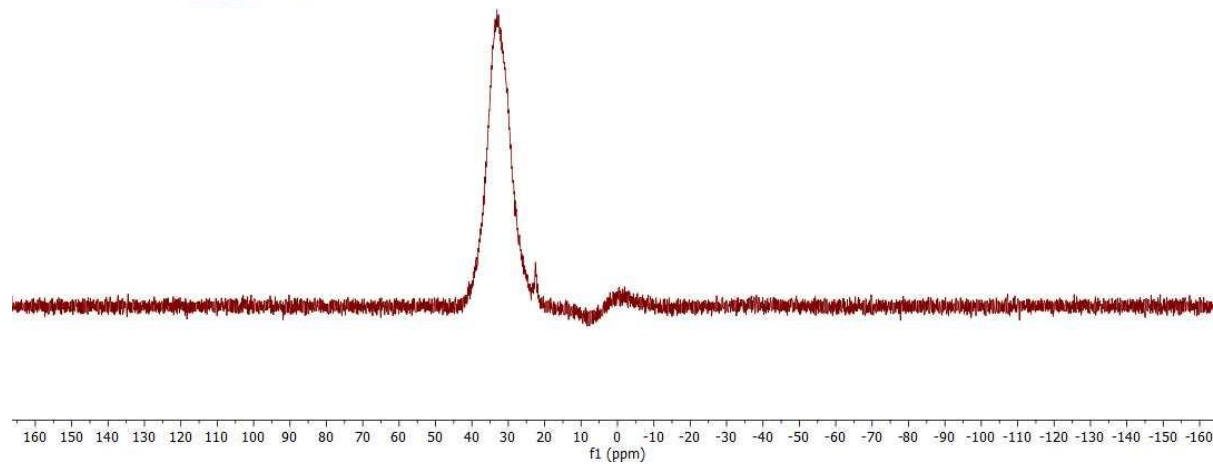

211125.338.10.fid — Fupeng Wu Ua-31 — Au1H CDCl3 {C:\Bruker\TopSpin3.6.2} 2111 38 — 300.13MHz

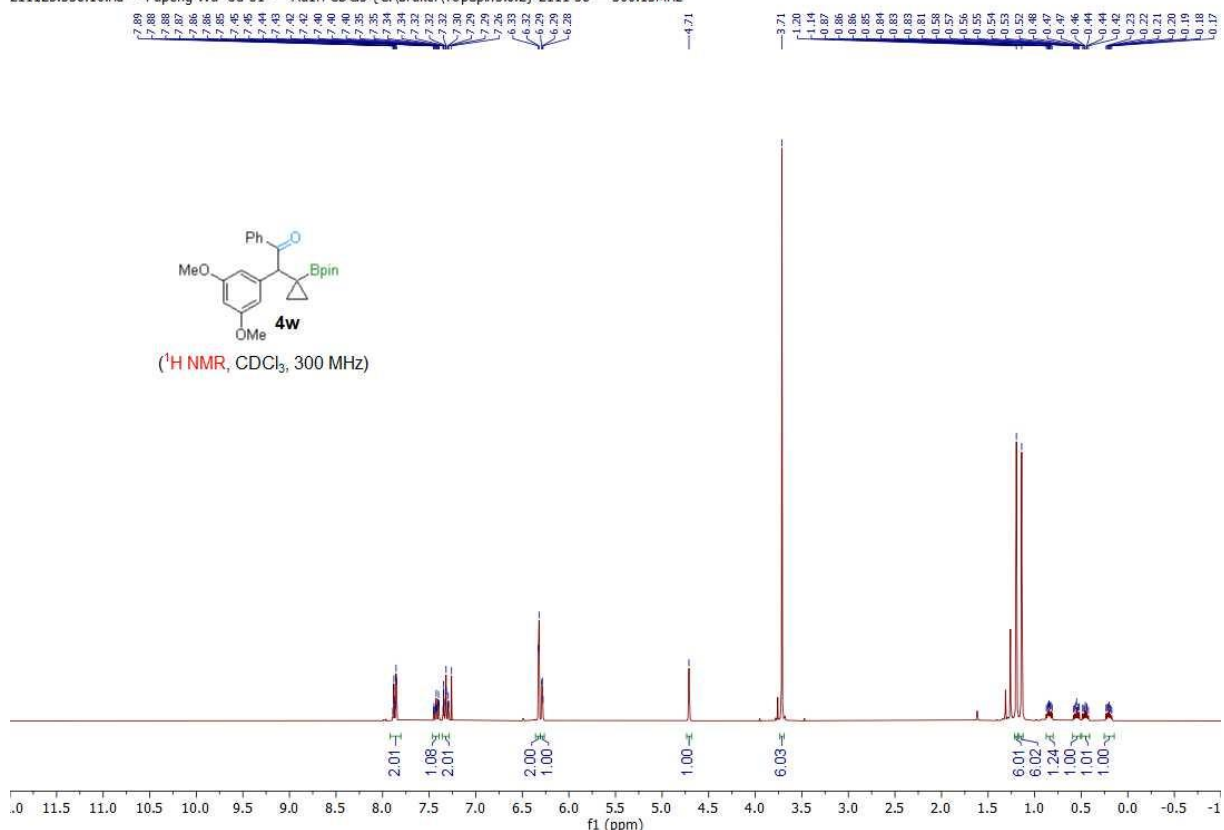

211125.338.11.fid — Fupeng Wu Ua-31 — Au13C CDCl3 {C:\Bruker\TopSpin3.6.2} 2111 38 — 75.48MHz

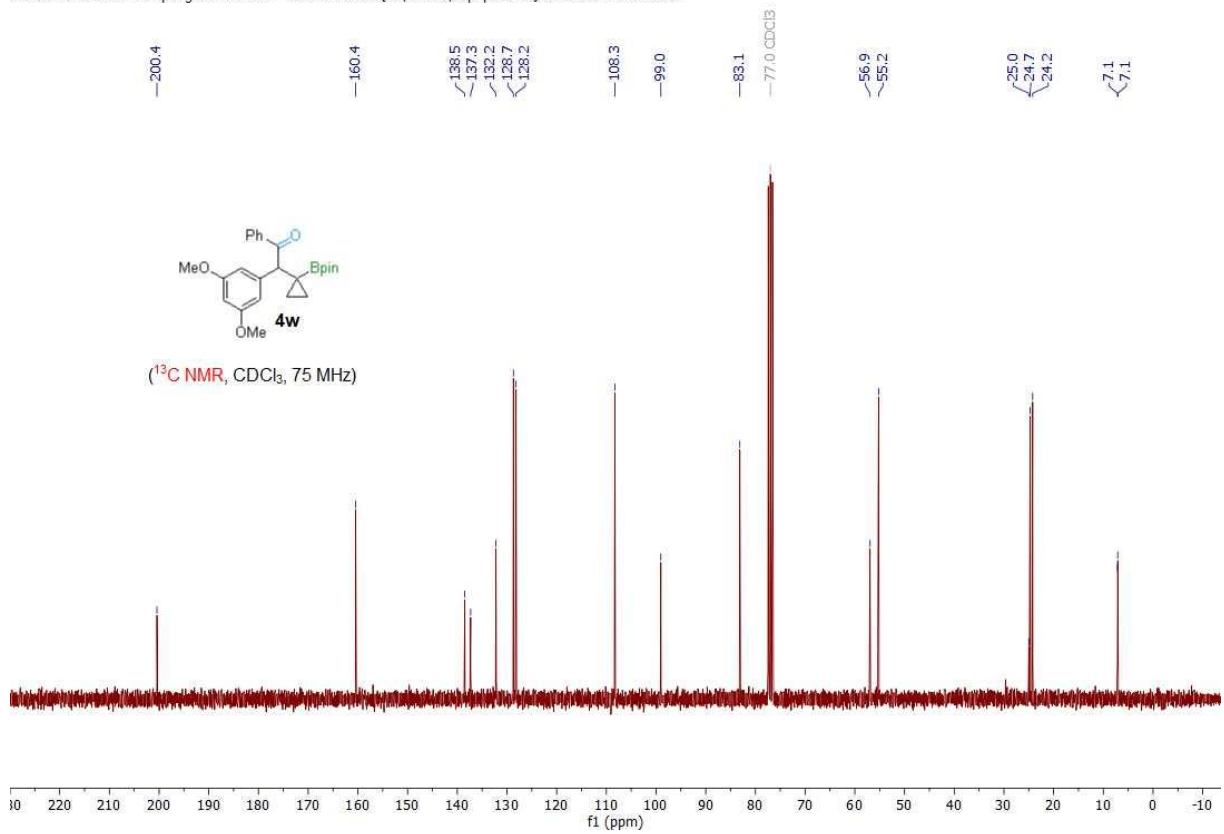

— 32.2

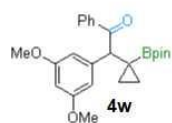

(<sup>11</sup>B NMR, CDCl<sub>3</sub>, 96 MHz)

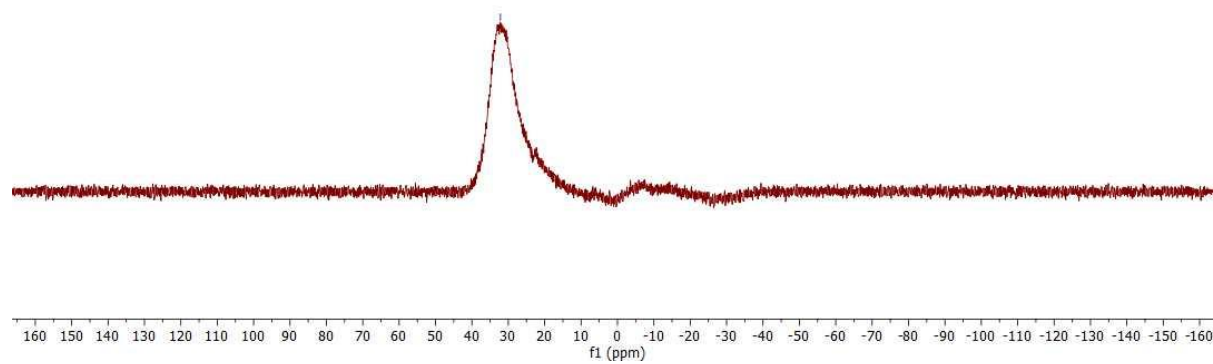



— 32.9

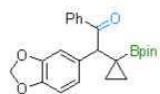

**4x**

(<sup>11</sup>B NMR, CDCl<sub>3</sub>, 96 MHz)

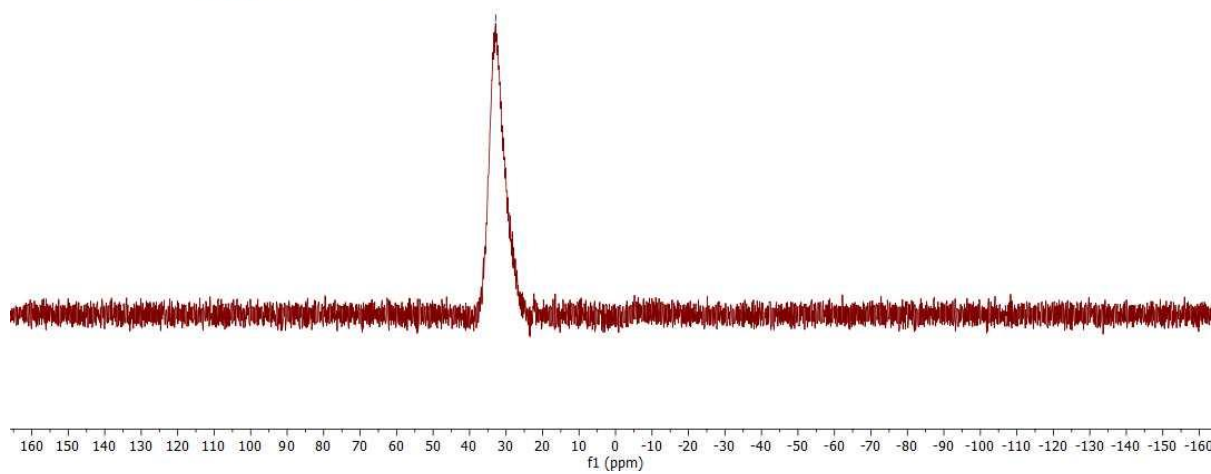

211126.f326.10.fid — Fupeng Wu Ua-33-2 — PROTON CDCl<sub>3</sub> {C:\Bruker\TopSpin3.6.2} 2111 26 — 300.20MHz

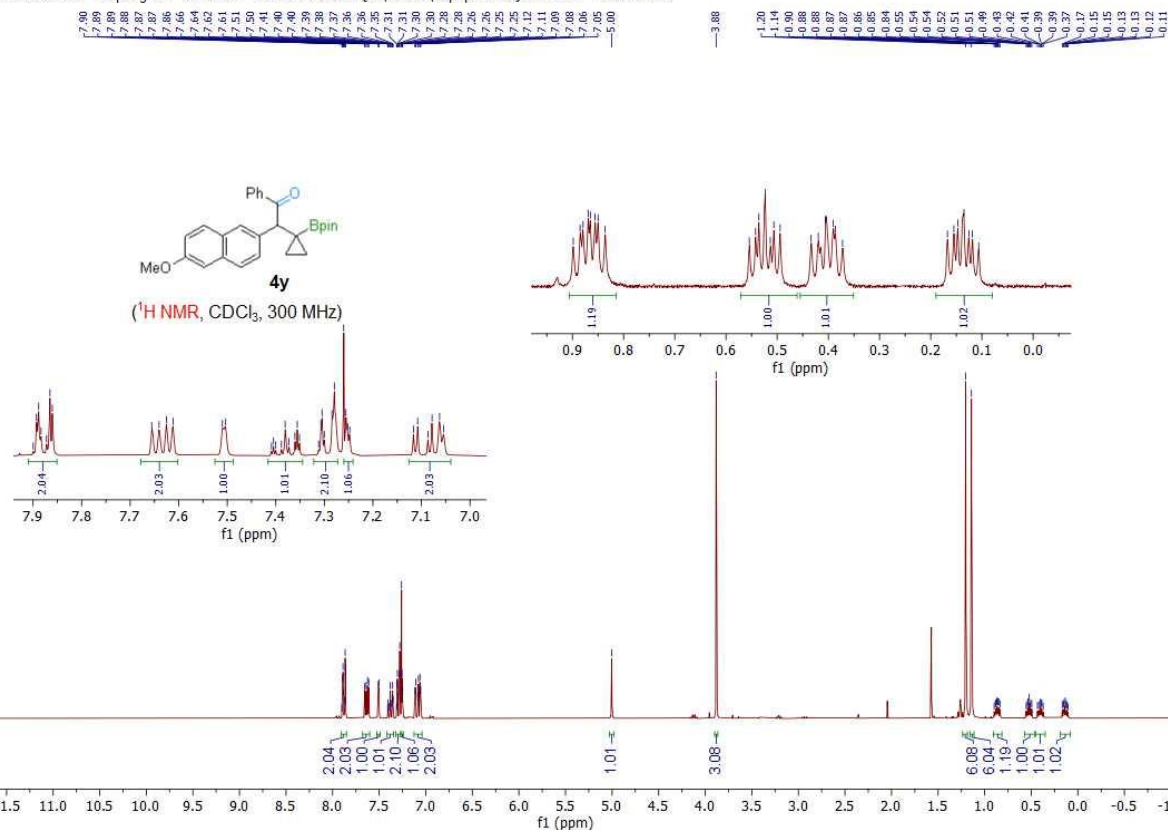

211129.450.10.fid — Fupeng Wu Ua-33-2 — Au13C CDCl<sub>3</sub> {C:\Bruker\TopSpin3.5pl6} 2111 50 — 100.63MHz

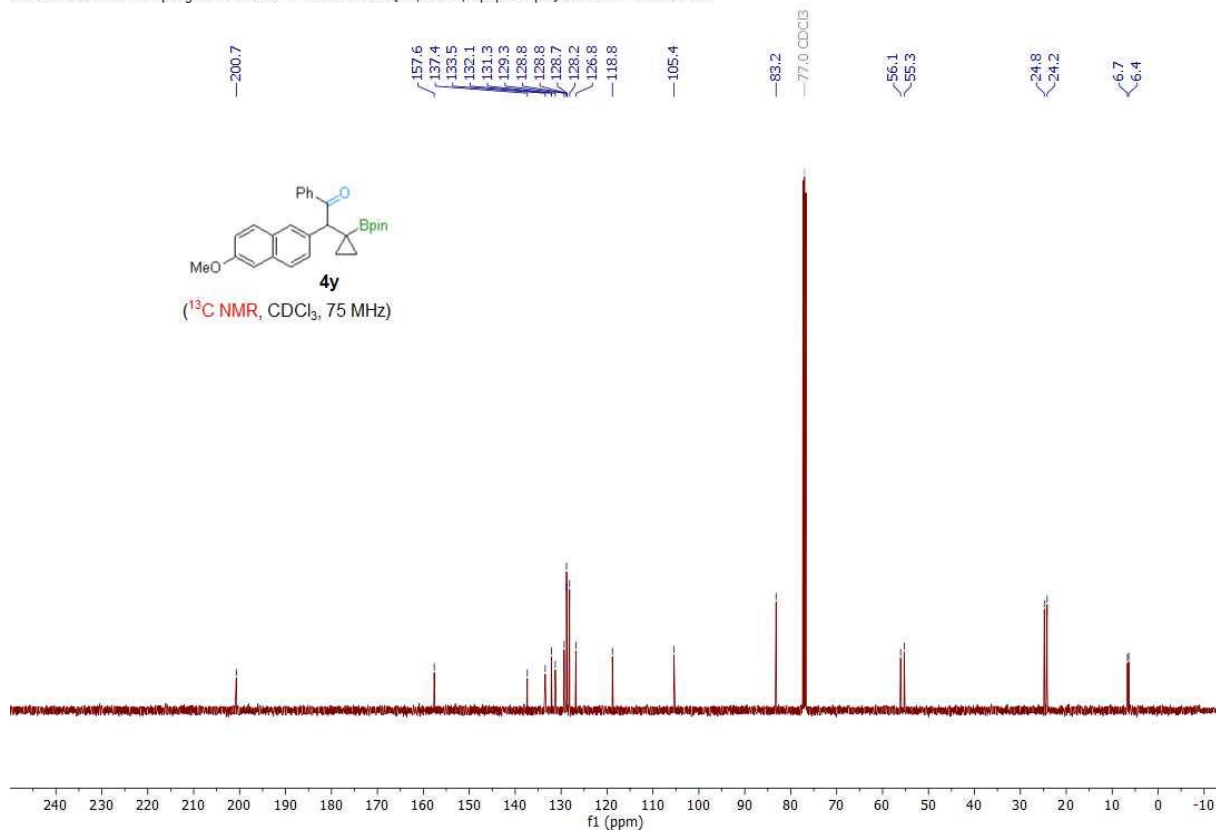



— 33.9

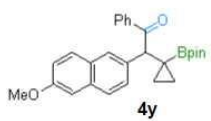

(<sup>11</sup>B NMR, CDCl<sub>3</sub>, 96 MHz)

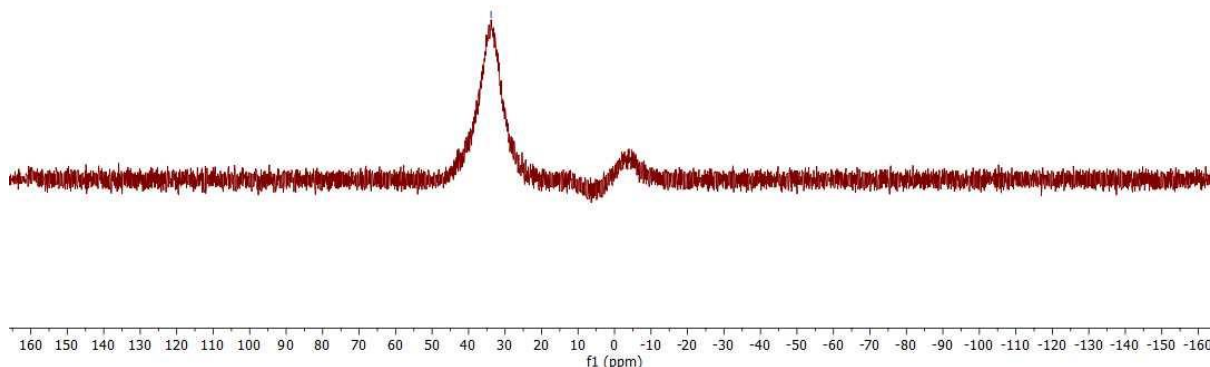

7.87 7.86 7.86 7.84 7.83 7.47 7.46 7.44 7.44 7.42 7.41 7.36 7.34 7.33 7.31 7.25 7.22 7.22 7.20 7.17 6.97 6.95 6.94 6.91 6.91 6.89 6.88 6.86 6.85 6.85 1.18 1.13 0.88 0.86 0.85 0.84 0.83 0.83 0.81 0.81 0.82 0.82 0.66 0.59 0.57 0.42 0.41 0.38 0.38 0.37 0.36 0.23 0.21 0.21 0.18 0.18 0.16

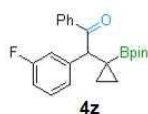

(<sup>1</sup>H NMR, CDCl<sub>3</sub>, 300 MHz)

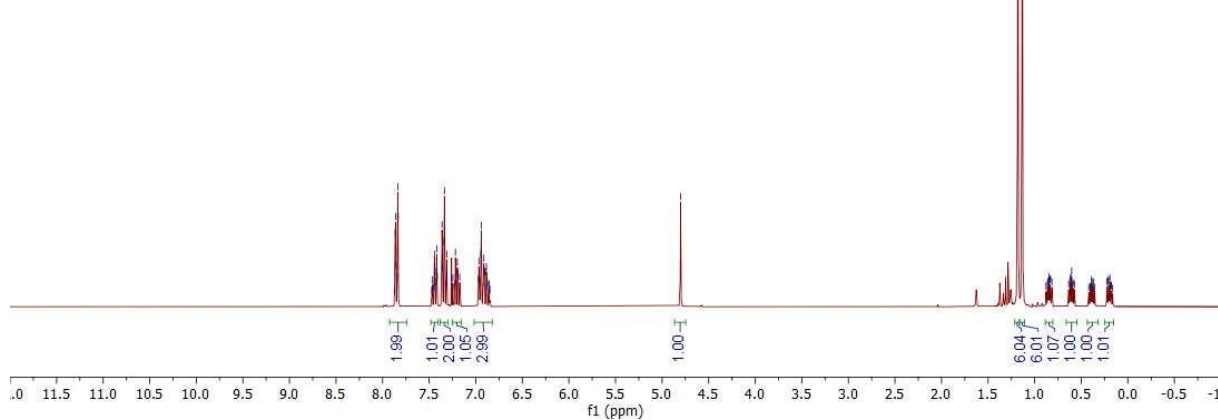

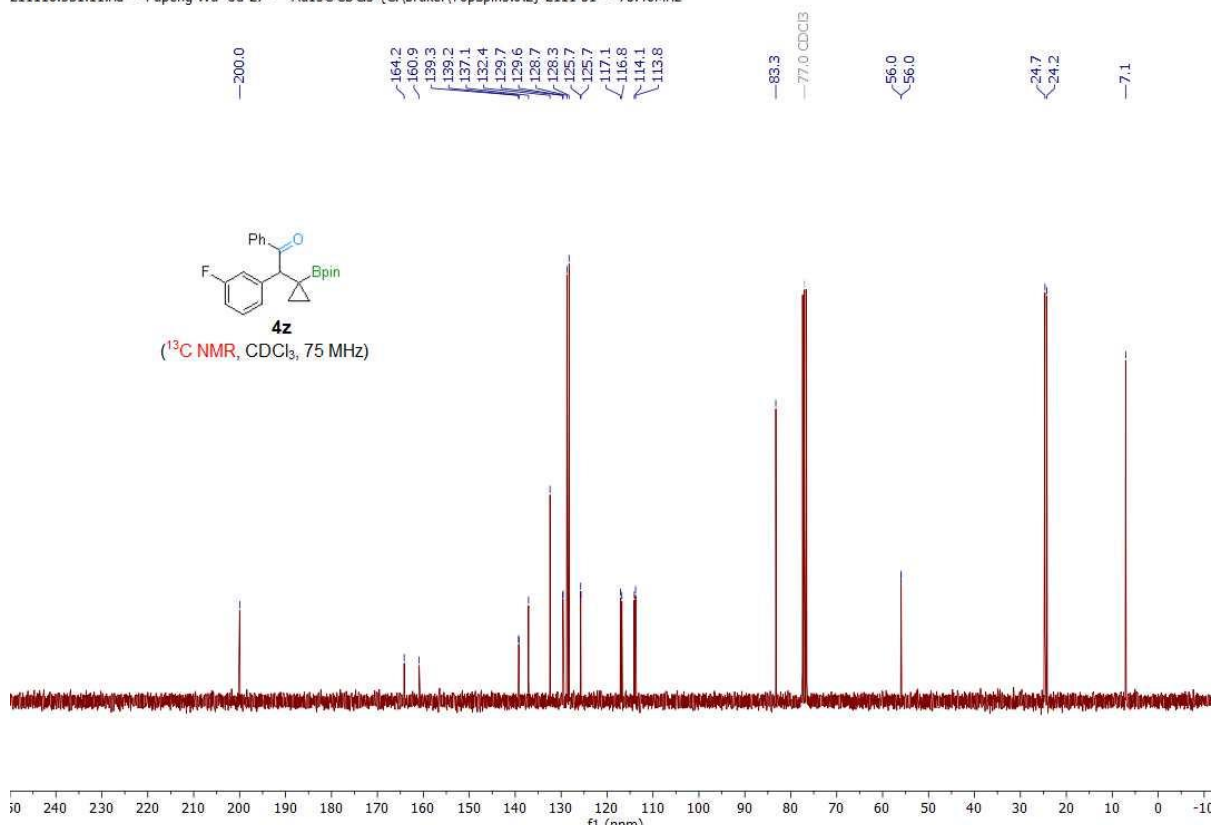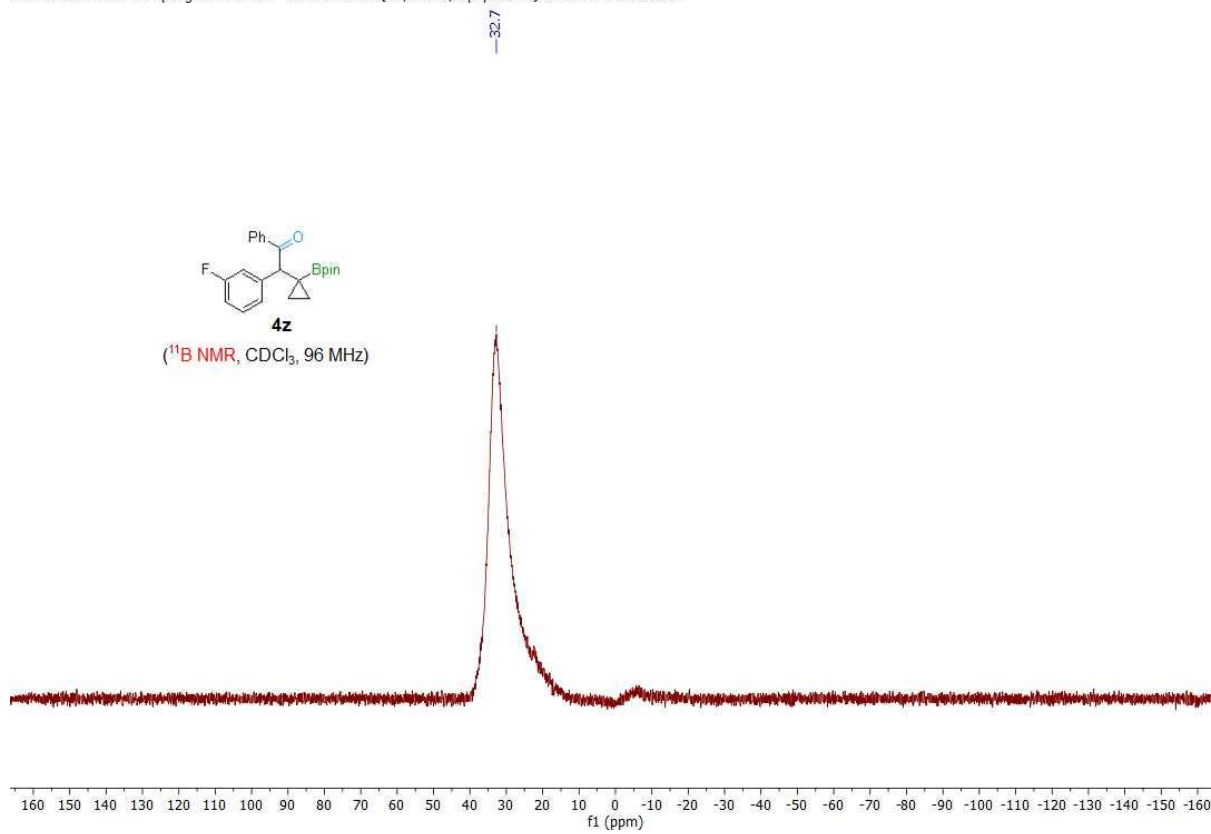



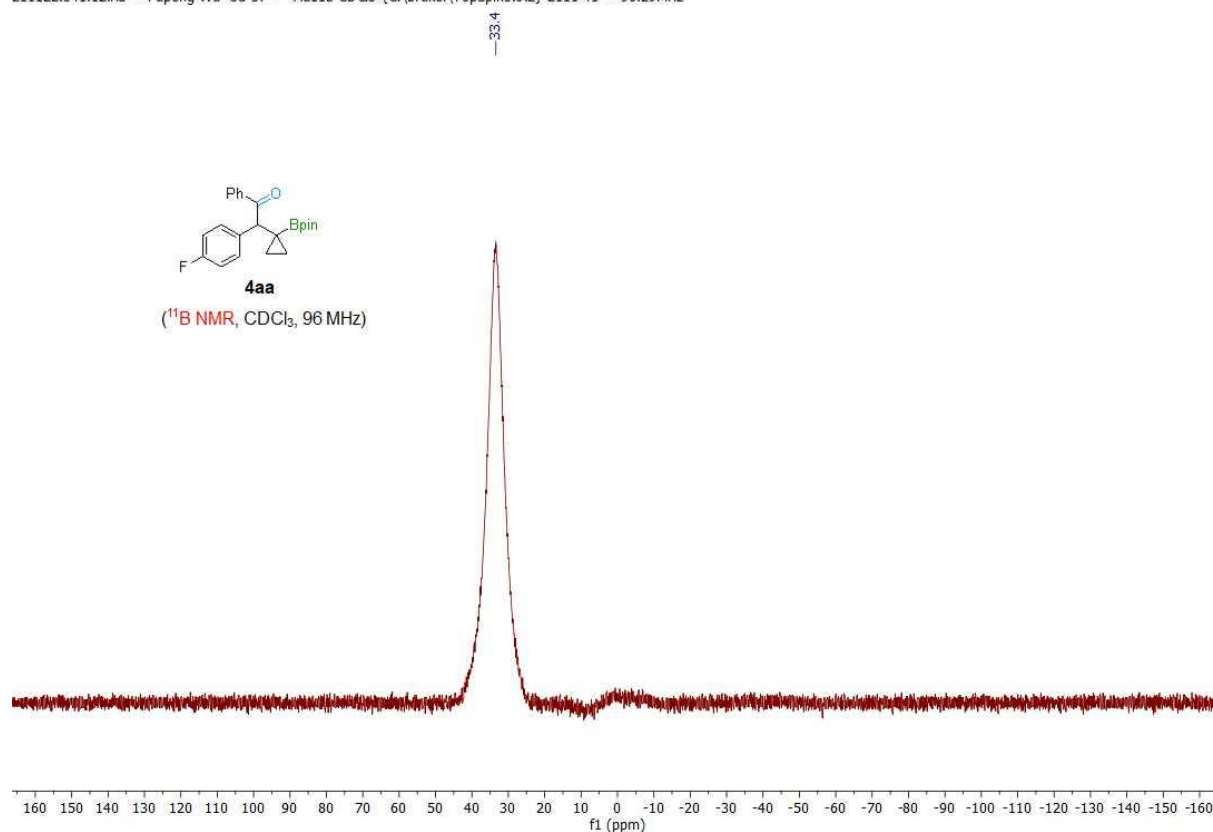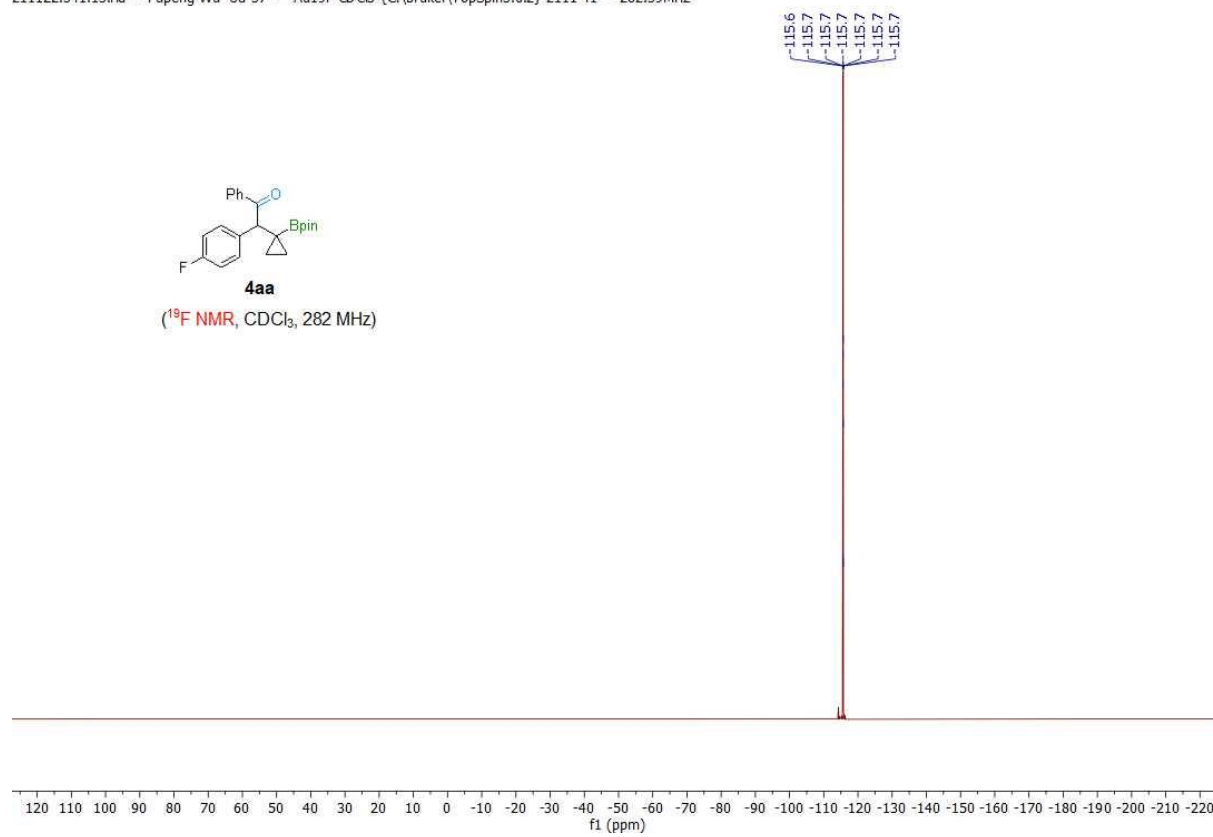

211125.337.10.fid — Fupeng Wu Ua-17 — Au1H CDCl3 {C:\Bruker\TopSpin3.6.2} 2111 37 — 300.13MHz

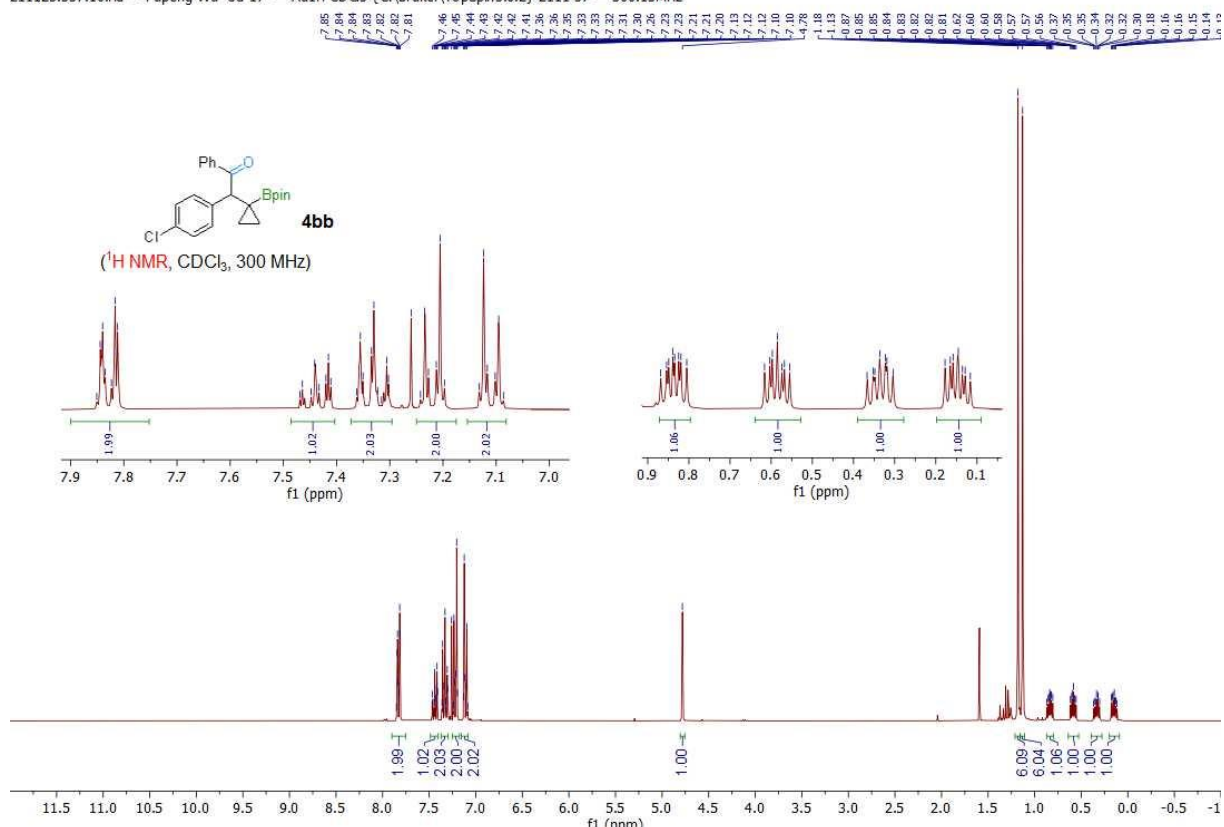

211125.337.11.fid — Fupeng Wu Ua-17 — Au13C CDCl3 {C:\Bruker\TopSpin3.6.2} 2111 37 — 75.48MHz

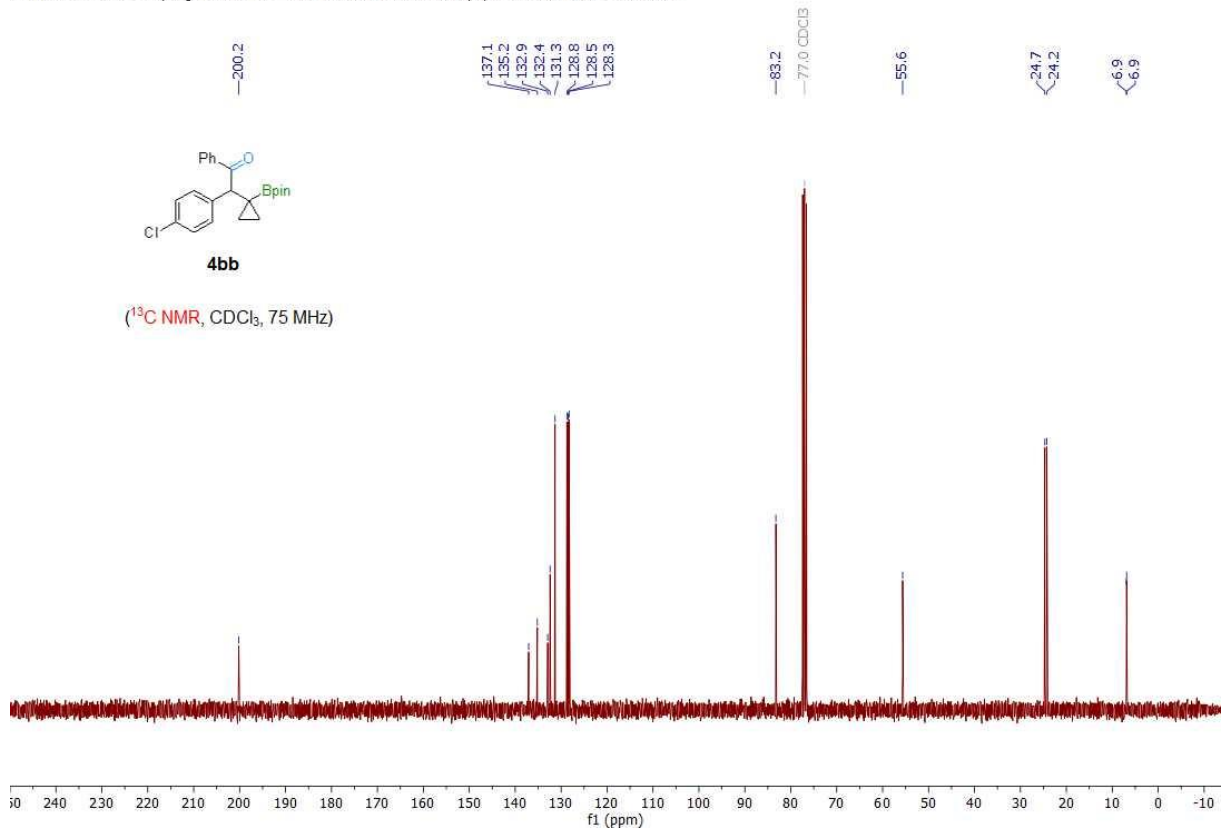

— 32.5

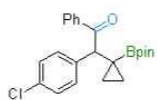

**4bb**

(<sup>1</sup>B NMR, CDCl<sub>3</sub>, 96 MHz)

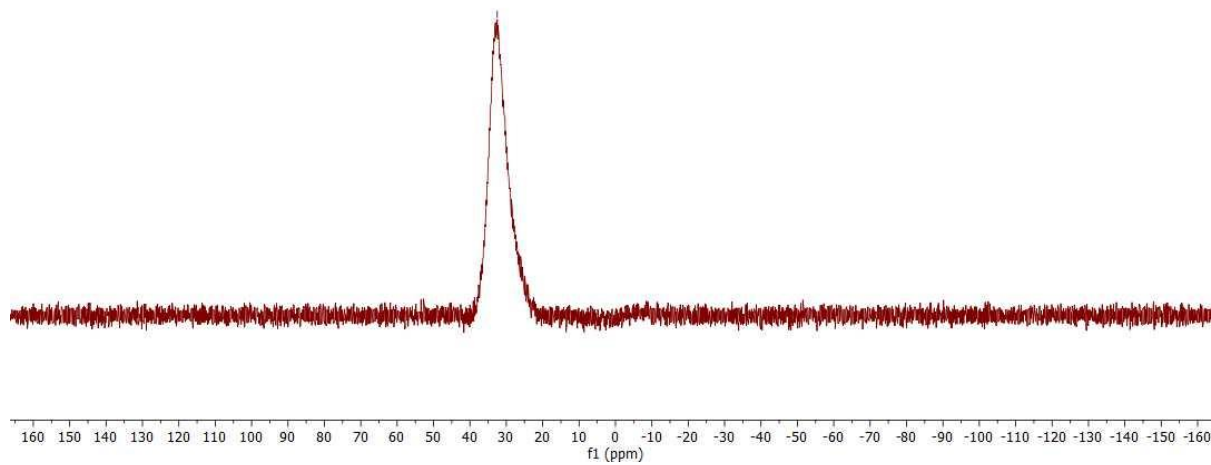

211122.339.10.fid — Fupeng Wu Ua-32 — Au1H CDCl3 {C:\Bruker\TopSpin3.6.2} 2111 39 — 300.13MHz

7.95 7.92 7.86 7.85 7.85 7.85 7.84 7.84 7.83 7.83 7.83 7.82 7.82 7.81 7.47 7.47 7.45 7.44 7.44 7.42 7.42 7.41 7.41 7.39 7.39 7.36 7.36 7.36 7.34 7.34 7.32 7.31 7.31 7.29 7.29 7.26 7.26 7.11 7.11 5.42

1.20 1.14 0.94 0.92 0.91 0.89 0.89 0.87 0.85 0.85 0.56 0.55 0.52 0.51 0.50 0.49 0.05 0.03 0.02 0.01 0.00 -0.02

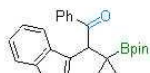

**4cc**

(<sup>1</sup>H NMR, CDCl<sub>3</sub>, 300 MHz)

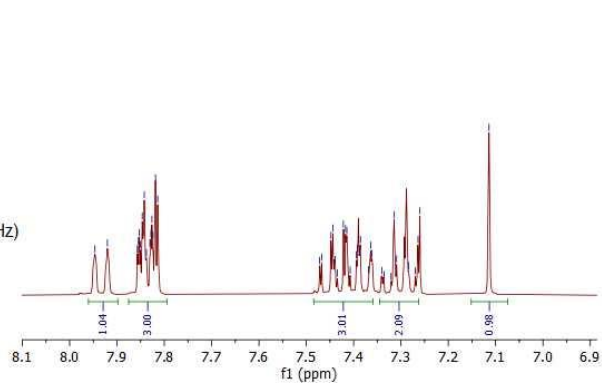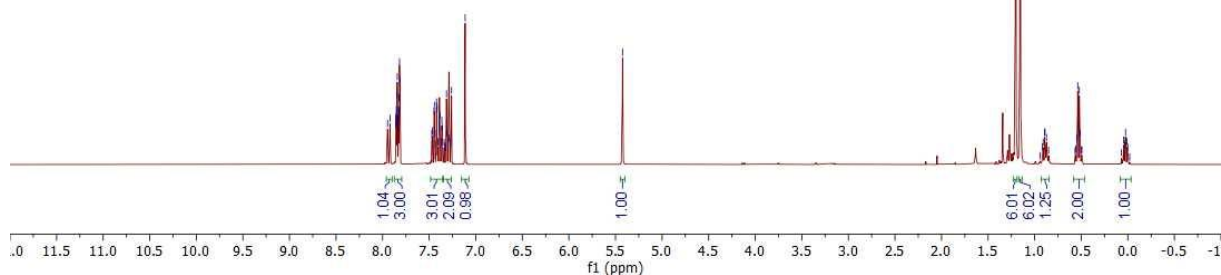

211122.339.11.fid — Fupeng Wu Ua-32 — Au13C CDCl3 {C:\Bruker\TopSpin3.6.2} 2111 39 — 75.48MHz

199.9

140.2 138.9 137.1 132.3 130.6 128.4 128.3 125.8 124.4 124.3 123.0 121.5

83.3 77.0 CDCl3

48.3

24.8 24.2 7.8 7.1

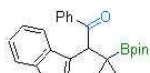

**4cc**

(<sup>13</sup>C NMR, CDCl<sub>3</sub>, 75 MHz)

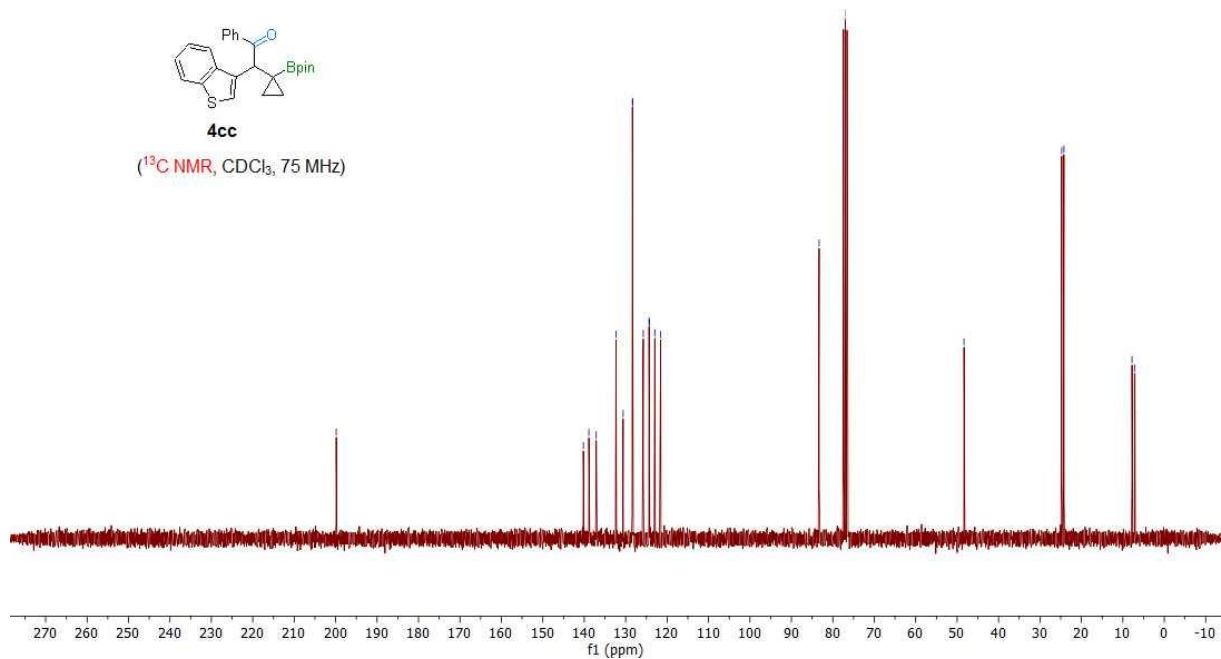

—33.1

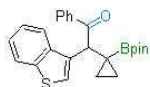

**4cc**

(<sup>11</sup>B NMR, CDCl<sub>3</sub>, 96 MHz)

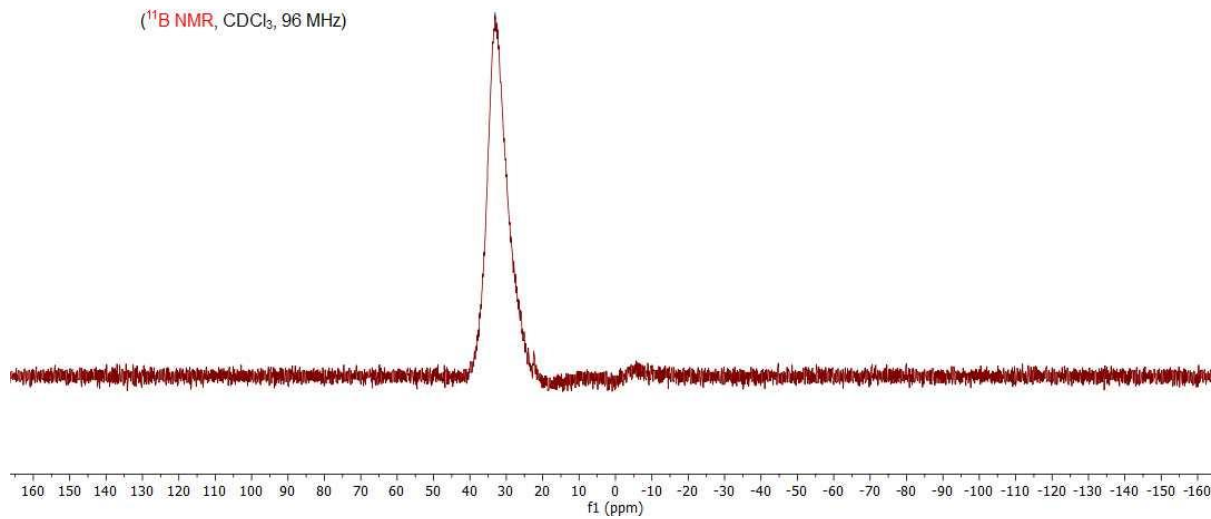





211130.f360.10.fid — Fupeng Wu Ub-T-2 — PROTON CDCl3 {C:\Bruker\TopSpin3.6.2} 2111 60 — 300.20MHz

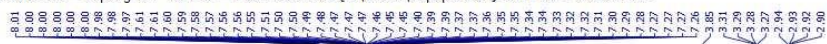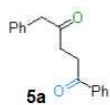

(<sup>1</sup>H NMR, CDCl<sub>3</sub>, 300 MHz)

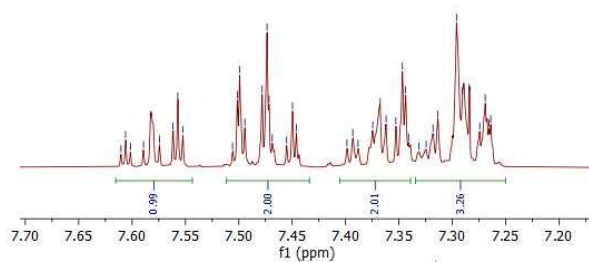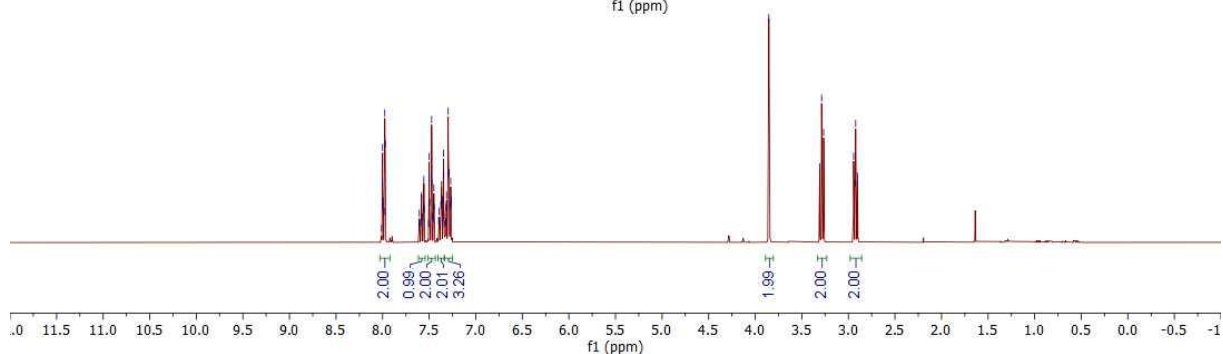

211130.f360.11.fid — Fupeng Wu Ub-T-2 — C13CPD CDCl3 {C:\Bruker\TopSpin3.6.2} 2111 60 — 75.49MHz

—207.0  
—198.5

136.6  
134.2  
133.1  
129.5  
128.7  
128.5  
128.0  
127.0

—77.0 CDCl3

—50.2

—35.6  
—32.5

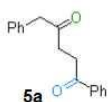

(<sup>13</sup>C NMR, CDCl<sub>3</sub>, 75 MHz)

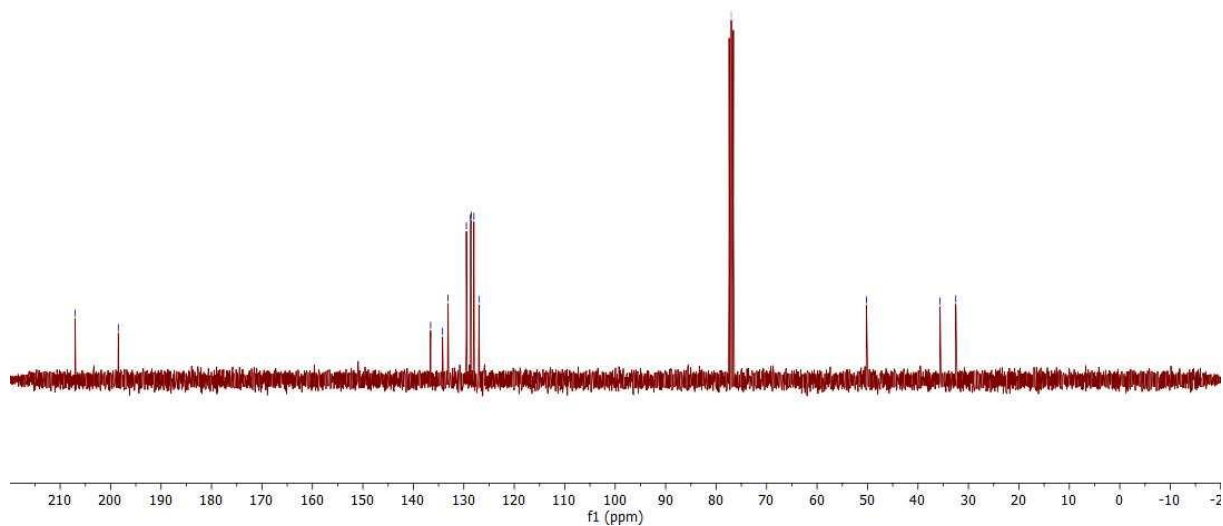

211202.326.10.fid — Fupeng Wu Ub-T-6 — Au1H CDCl3 {C:\Bruker\TopSpin3.6.2} 2112 26 — 300.13MHz

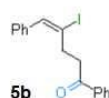

(<sup>1</sup>H NMR, CDCl<sub>3</sub>, 300 MHz)

8.00  
7.99  
7.99  
7.99  
7.98  
7.97  
7.80  
7.78  
7.57  
7.56  
7.55  
7.50  
7.50  
7.49  
7.48  
7.47  
7.46  
7.45  
7.44  
7.35  
7.34  
7.34  
7.33  
7.32  
7.31  
7.31  
7.29  
7.29  
7.28  
7.26  
7.22  
7.22  
7.22  
7.21  
7.20  
7.20  
7.19  
7.19  
3.33  
3.33  
3.33  
3.31  
3.30  
3.30  
3.29  
3.28  
3.28  
3.05  
3.04  
3.04  
3.03  
3.03  
3.01  
3.00  
1.94

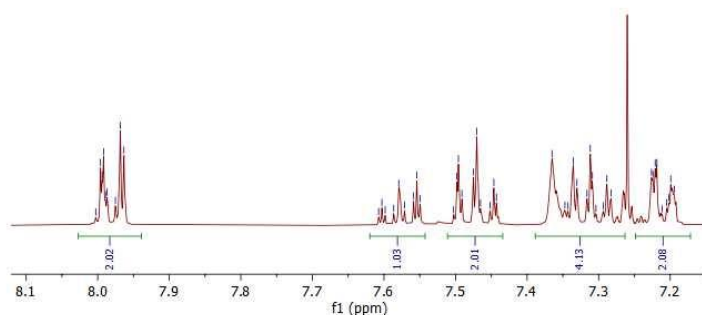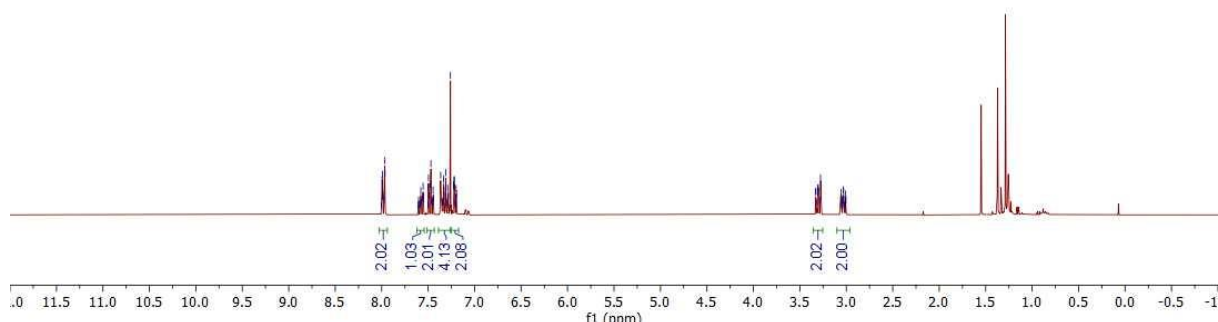

211203.336.10.fid — Fupeng Wu Ub-T-6 — Au13C CDCl3 {C:\Bruker\TopSpin3.6.2} 2112 36 — 75.48MHz

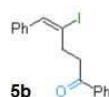

(<sup>13</sup>C NMR, CDCl<sub>3</sub>, 75 MHz)

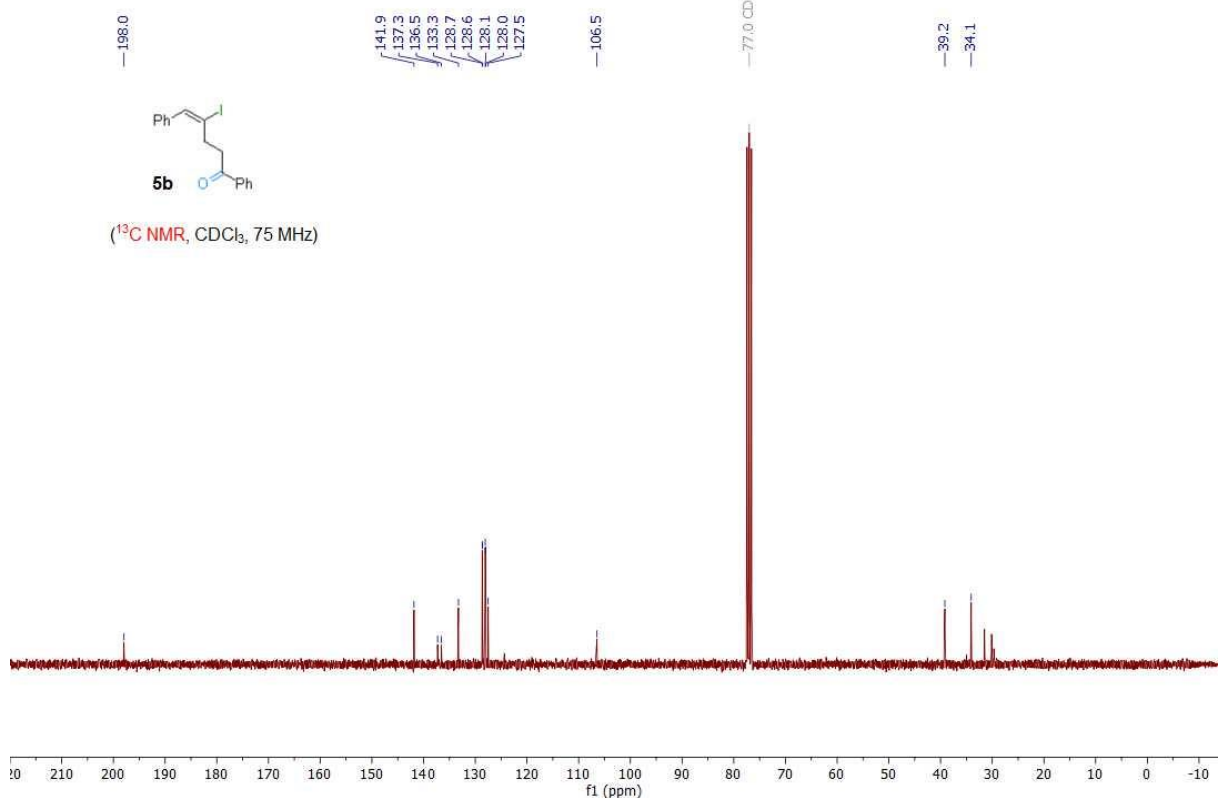

211201.f366.10.fid — Fupeng Wu Ub-T-3 — PROTON CDCl3 {C:\Bruker\TopSpin3.6.2} 2112 6 — 300.20MHz

7.90 7.89 7.88 7.87 7.86 7.85 7.84 7.83 7.82 7.81 7.80 7.79 7.78 7.77 7.76 7.75 7.74 7.73 7.72 7.71 7.70 7.69 7.68 7.67 7.66 7.65 7.64 7.63 7.62 7.61 7.60 7.59 7.58 7.57 7.56 7.55 7.54 7.53 7.52 7.51 7.50 7.49 7.48 7.47 7.46 7.45 7.44 7.43 7.42 7.41 7.40 7.39 7.38 7.37 7.36 7.35 7.34 7.33 7.32 7.31 7.30 7.29 7.28 7.27 7.26 7.25 7.24 7.23 7.22 7.21 7.20 7.19 7.18 7.17 7.16 7.15 7.14 7.13 7.12 7.11 7.10 7.09 7.08 7.07

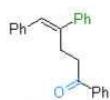

5c

(<sup>1</sup>H NMR, CDCl<sub>3</sub>, 300 MHz)

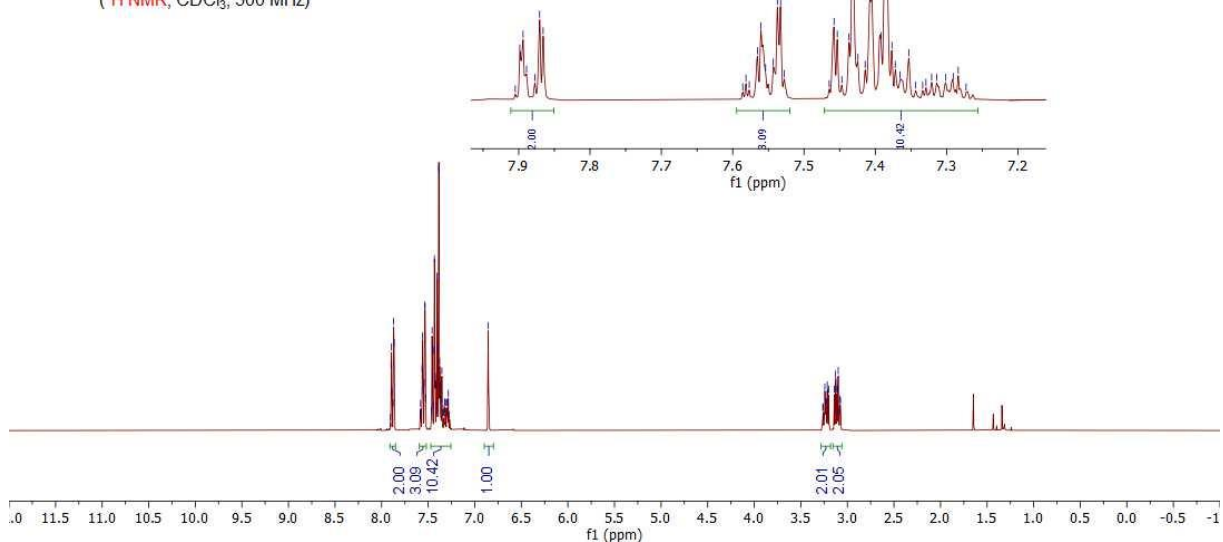

211201.f366.11.fid — Fupeng Wu Ub-T-3 — C13CPD CDCl3 {C:\Bruker\TopSpin3.6.2} 2112 6 — 75.49MHz

—199.3

142.1 141.4 137.8 136.6 133.0 129.2 128.6 128.6 128.5 128.4 128.0 127.5 126.8 126.6

—77.0 CDCl3

—37.6

—24.7

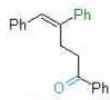

5c

(<sup>13</sup>C NMR, CDCl<sub>3</sub>, 75 MHz)

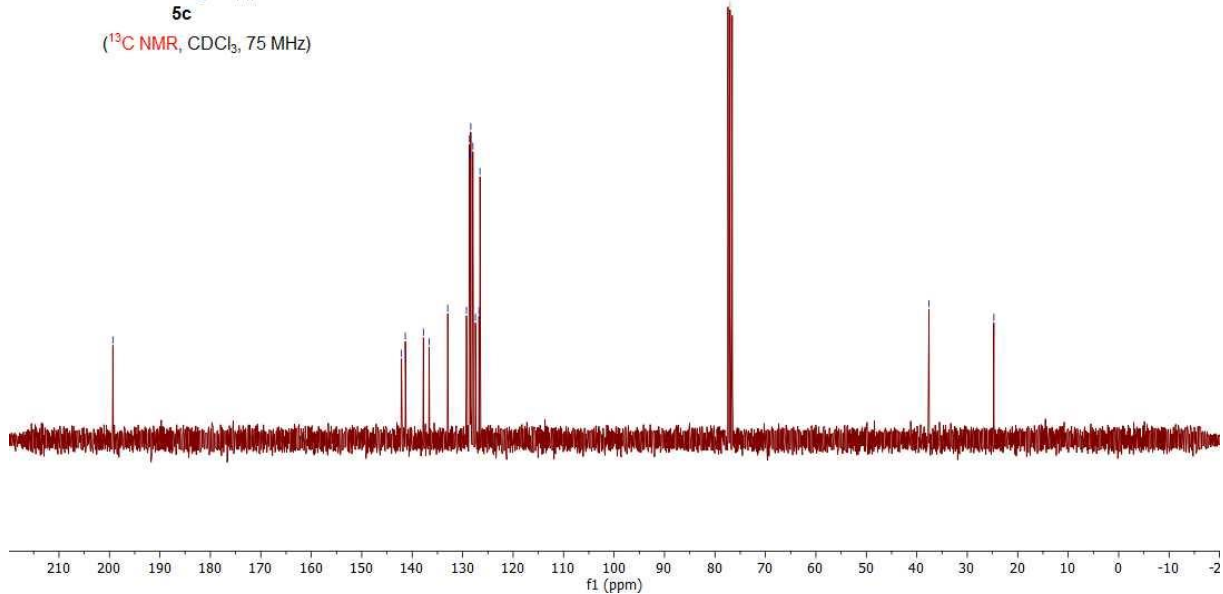

211202.327.10.fid — Fupeng Wu Ub-T-7 — Au1H CDCl3 {C:\Bruker\TopSpin3.6.2} 2112 27 — 300.13MHz

7.97  
7.97  
7.95  
7.94  
7.59  
7.58  
7.56  
7.55  
7.54  
7.54  
7.53  
7.48  
7.46  
7.46  
7.45  
7.43  
7.36  
7.34  
7.34  
7.34  
7.32  
7.32  
7.31  
7.29  
7.29  
7.29  
7.25  
7.25  
7.24  
7.24  
7.23  
7.23  
7.23  
7.23  
6.51  
6.51  
6.50  
6.50  
6.47  
6.47  
6.46  
6.46  
5.72  
5.72  
5.70  
5.68  
3.15  
3.12  
3.10  
3.10  
2.82  
2.80  
2.79  
2.78  
2.77  
2.75

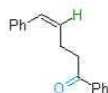

**5d**

(<sup>1</sup>H NMR, CDCl<sub>3</sub>, 300 MHz)

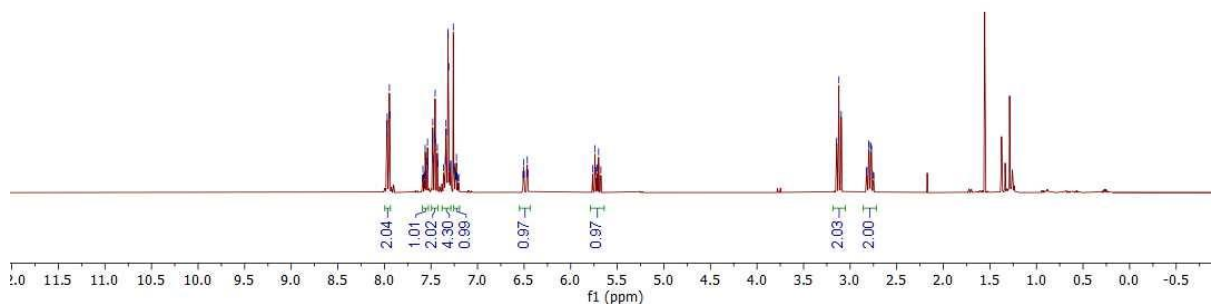

211202.327.11.fid — Fupeng Wu Ub-T-7 — Au13C CDCl3 {C:\Bruker\TopSpin3.6.2} 2112 27 — 75.48MHz

199.3

137.3  
136.8  
133.0  
130.9  
130.0  
128.7  
128.6  
128.2  
128.0  
126.7

77.0 CDCl3

38.6

23.2

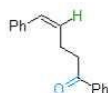

**5d**

(<sup>13</sup>C NMR, CDCl<sub>3</sub>, 75 MHz)

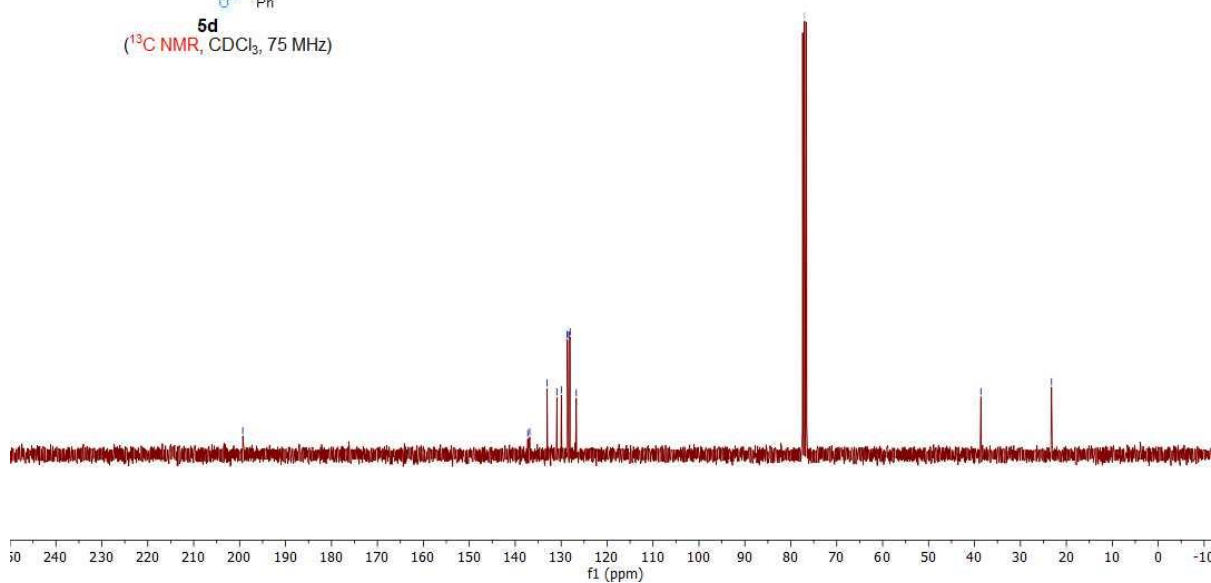

211116.340.10.fid — Fupeng Wu Ub-T-1 — Au1H CDCl3 {C:\Bruker\TopSpin3.6.2} 2111 40 — 300.13MHz

7.94  
7.93  
7.92  
7.91  
7.90  
7.89  
7.88  
7.87  
7.86  
7.85  
7.84  
7.83  
7.82  
7.81  
7.80  
7.79  
7.78  
7.77  
7.76  
7.75  
7.74  
7.73  
7.72  
7.71  
7.70  
7.69  
7.68  
7.67  
7.66  
7.65  
7.64  
7.63  
7.62  
7.61  
7.60  
7.59  
7.58  
7.57  
7.56  
7.55  
7.54  
7.53  
7.52  
7.51  
7.50  
7.49  
7.48  
7.47  
7.46  
7.45  
7.44  
7.43  
7.42  
7.41  
7.40  
7.39  
7.38  
7.37  
7.36  
7.35  
7.34  
7.33  
7.32  
7.31  
7.30  
7.29  
7.28  
7.27  
7.26  
7.25  
7.24  
7.23  
7.22  
7.21  
7.20  
7.19  
7.18  
7.17  
7.16  
7.15  
7.14  
7.13  
7.12  
7.11  
7.10  
7.09  
7.08  
7.07  
7.06  
7.05  
7.04  
7.03  
7.02  
7.01  
7.00  
6.99  
6.98  
6.97  
6.96  
6.95  
6.94  
6.93  
6.92  
6.91  
6.90  
6.89  
6.88  
6.87  
6.86  
6.85  
6.84  
6.83  
6.82  
6.81  
6.80  
6.79  
6.78  
6.77  
6.76  
6.75  
6.74  
6.73  
6.72  
6.71  
6.70  
6.69  
6.68  
6.67  
6.66  
6.65  
6.64  
6.63  
6.62  
6.61  
6.60  
6.59  
6.58  
6.57  
6.56  
6.55  
6.54  
6.53  
6.52  
6.51

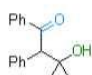

**6a**

(<sup>1</sup>H NMR, CDCl<sub>3</sub>, 300 MHz)

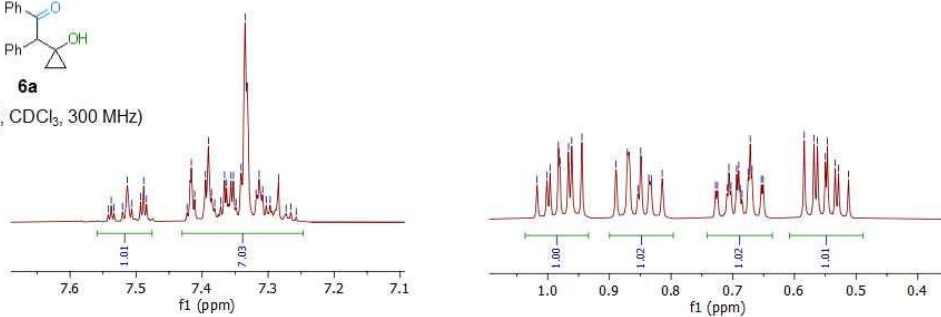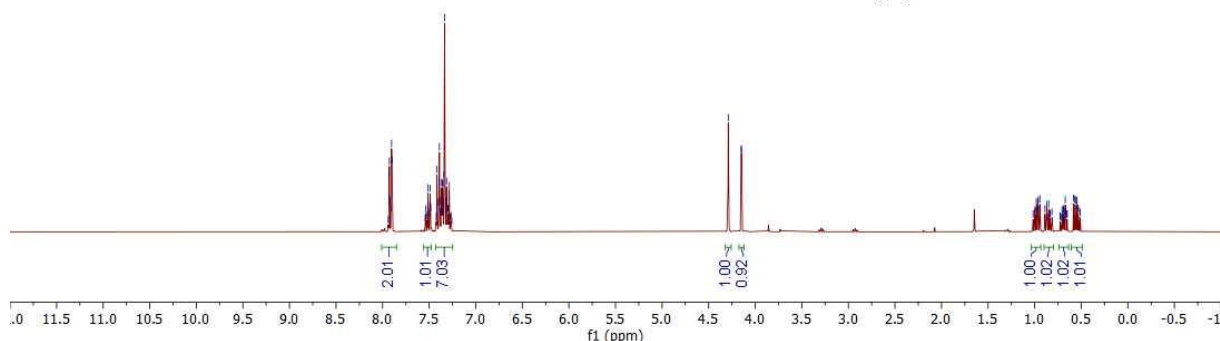

211116.340.11.fid — Fupeng Wu Ub-T-1 — Au13C CDCl3 {C:\Bruker\TopSpin3.6.2} 2111 40 — 75.48MHz

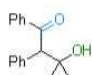

**6a**

(<sup>13</sup>C NMR, CDCl<sub>3</sub>, 75 MHz)

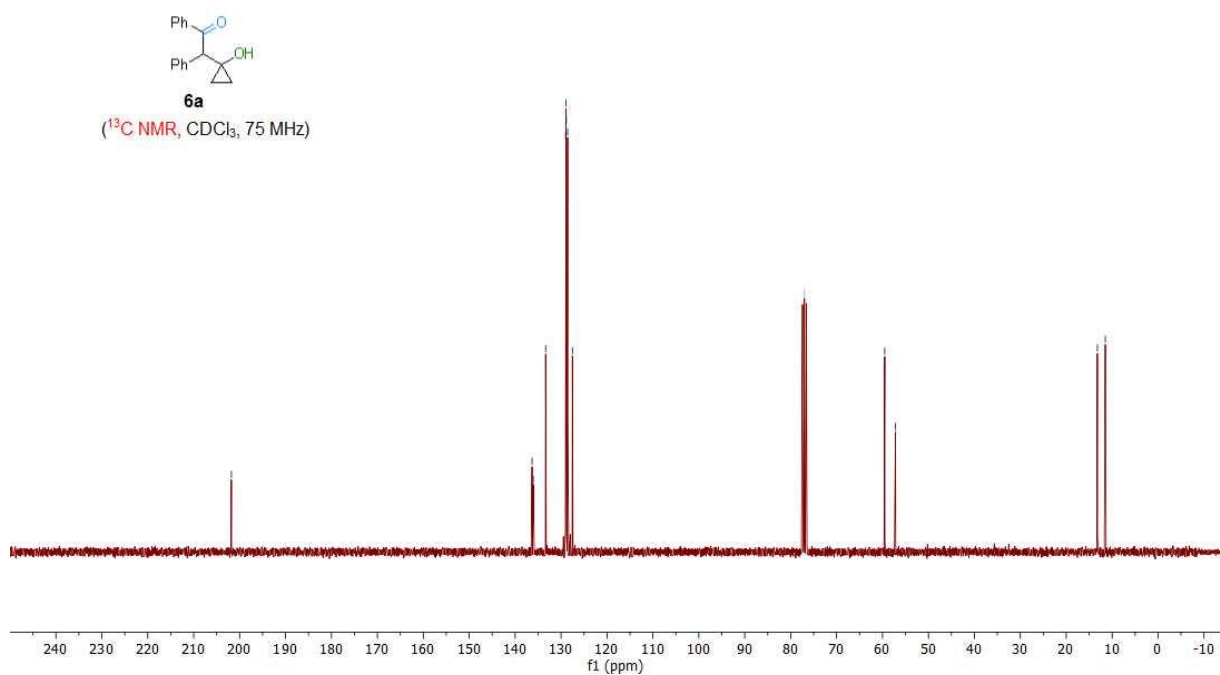

211130.f358.10.fid — Fupeng Wu Ua-T-5 — PROTON CDCl<sub>3</sub> {C:\Bruker\TopSpin3.6.2} 2111 58 — 300.20MHz

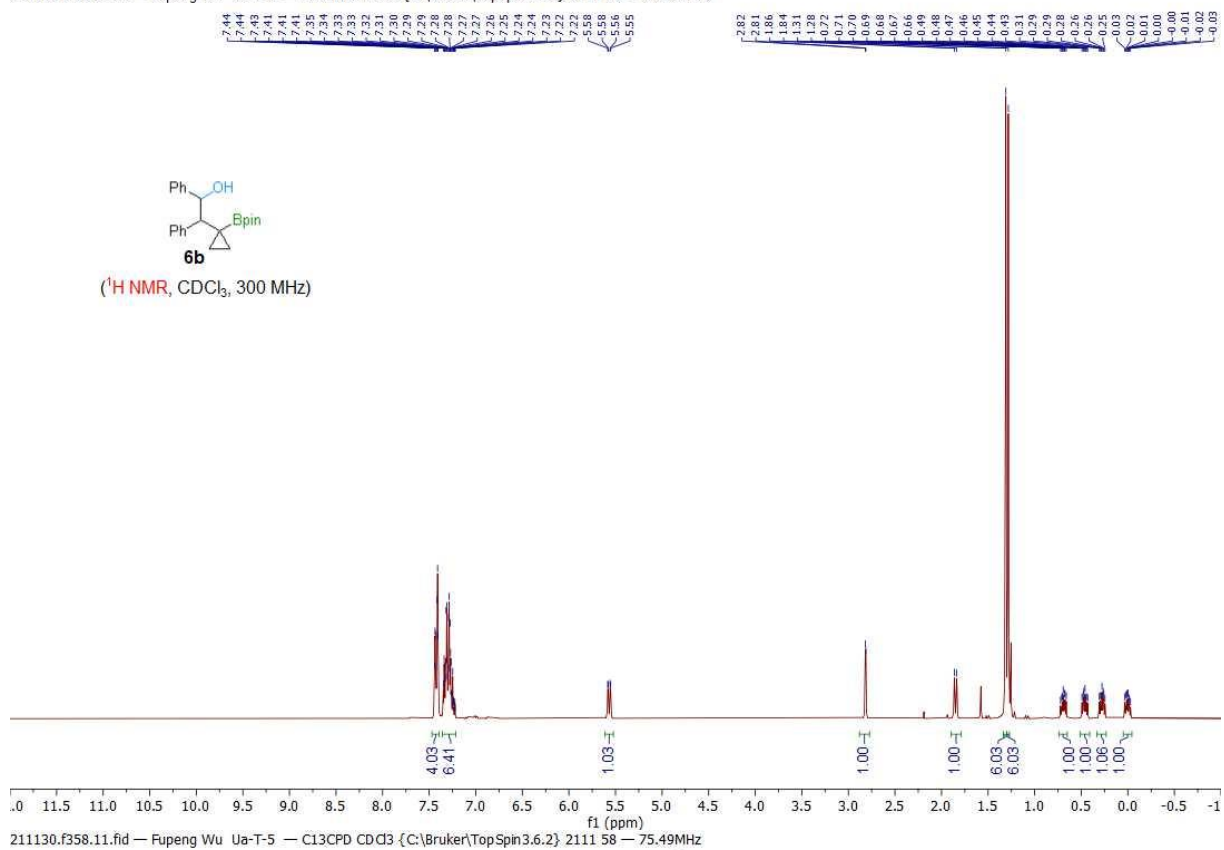

211130.f358.11.fid — Fupeng Wu Ua-T-5 — C13CPD CDCl<sub>3</sub> {C:\Bruker\TopSpin3.6.2} 2111 58 — 75.49MHz

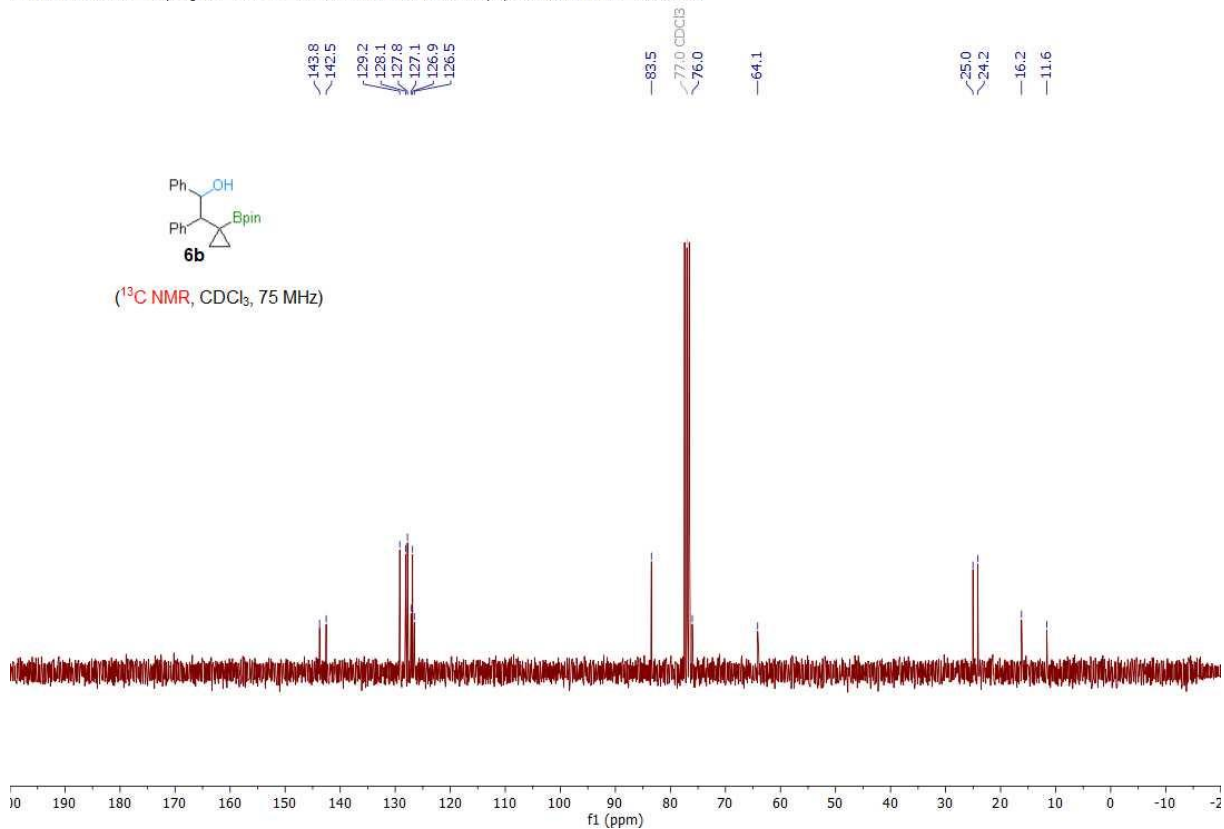

— 33.0

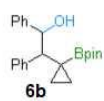

(<sup>11</sup>B NMR, CDCl<sub>3</sub>, 96 MHz)

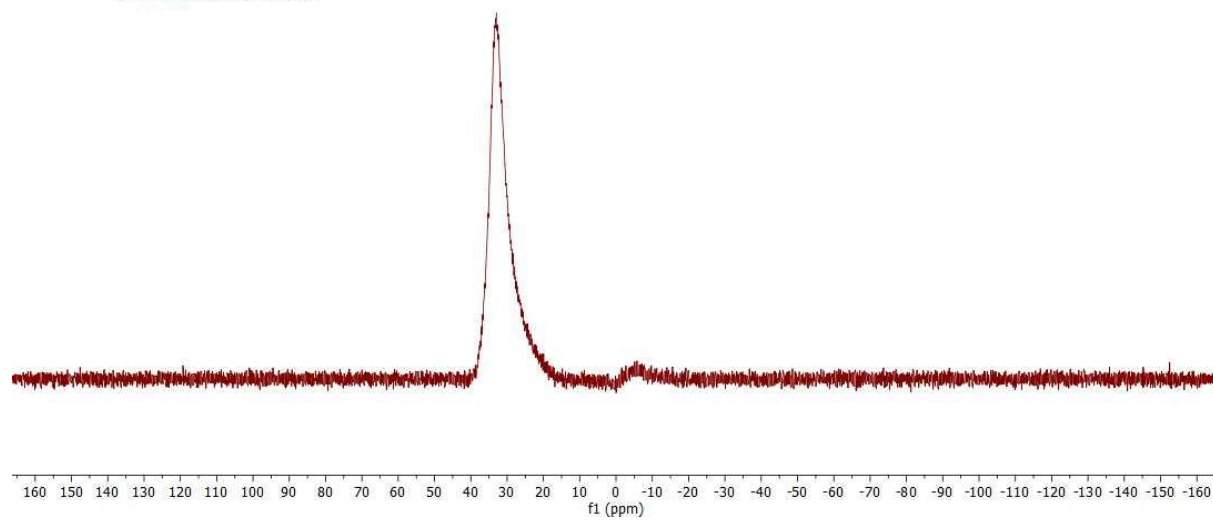



211203.335.10.fid — Fupeng Wu Ua-T-6 — Au1H CDCl3 {C:\Bruker\TopSpin3.6.2} 2112 35 — 300.13MHz

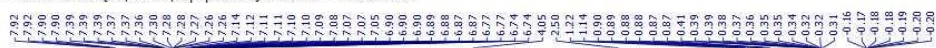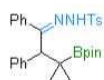

**6c**

(<sup>1</sup>H NMR, CDCl<sub>3</sub>, 300 MHz)

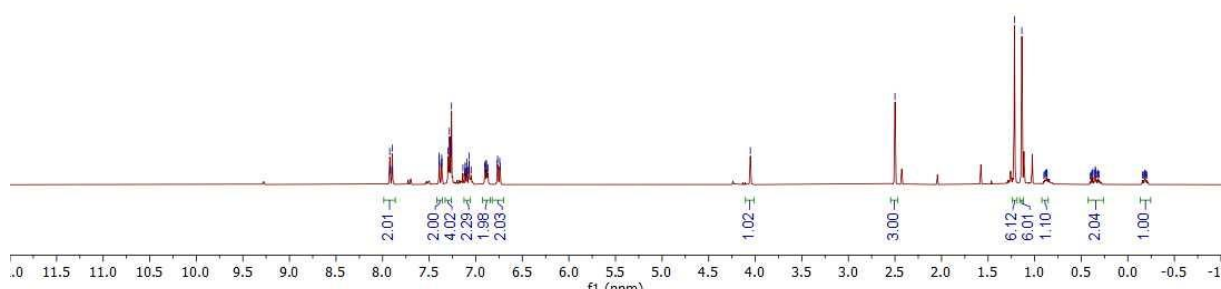

211203.335.11.fid — Fupeng Wu Ua-T-6 — Au13C CDCl3 {C:\Bruker\TopSpin3.6.2} 2112 35 — 75.48MHz

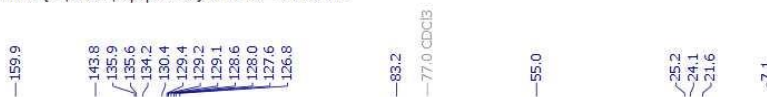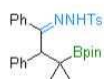

(<sup>13</sup>C NMR, CDCl<sub>3</sub>, 75 MHz)

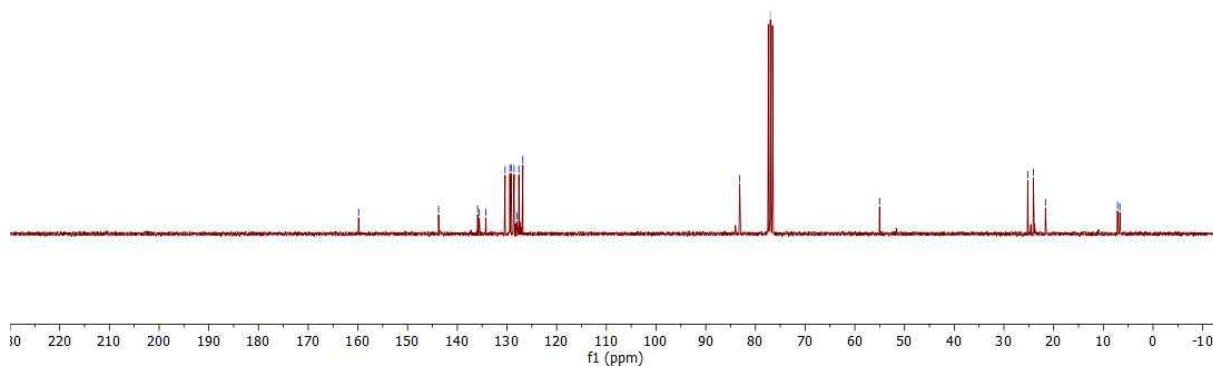

33.5

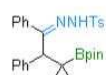

**6c**

(<sup>11</sup>B NMR, CDCl<sub>3</sub>, 96 MHz)

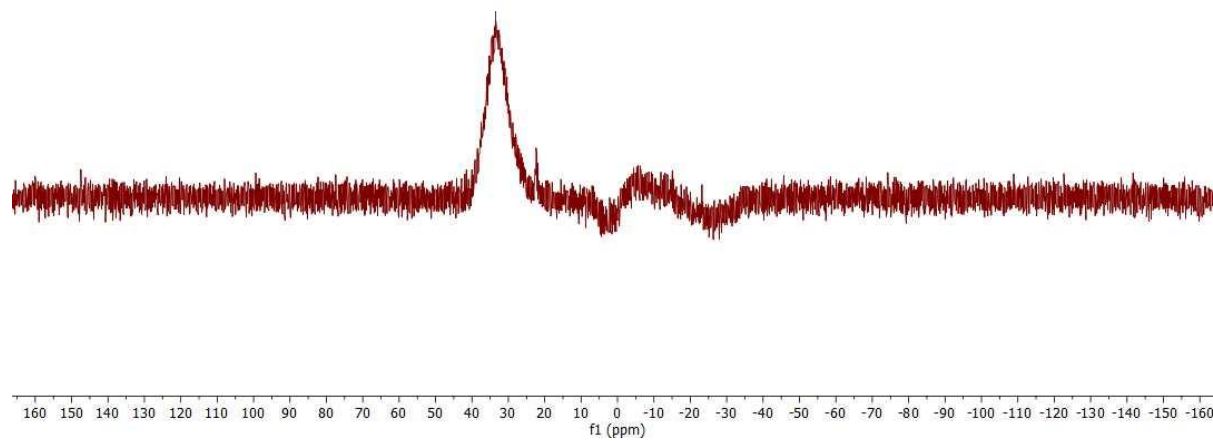

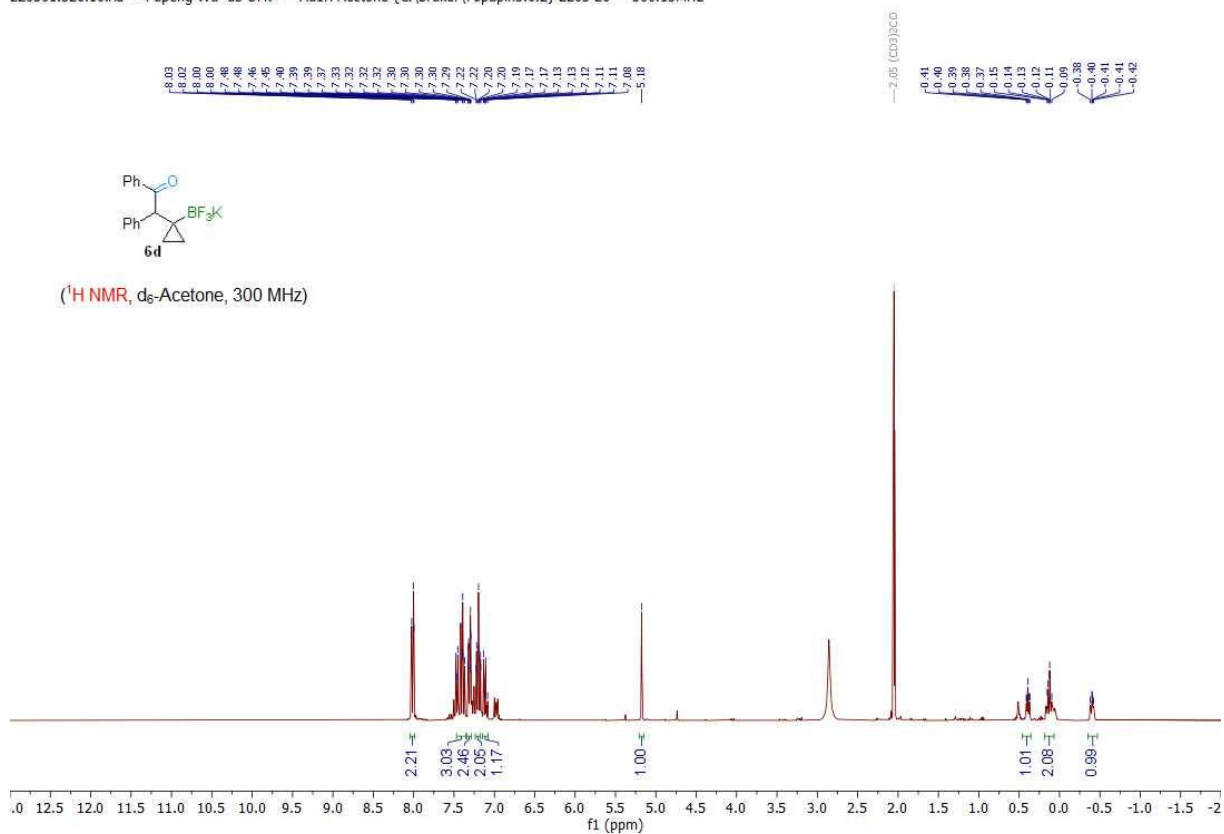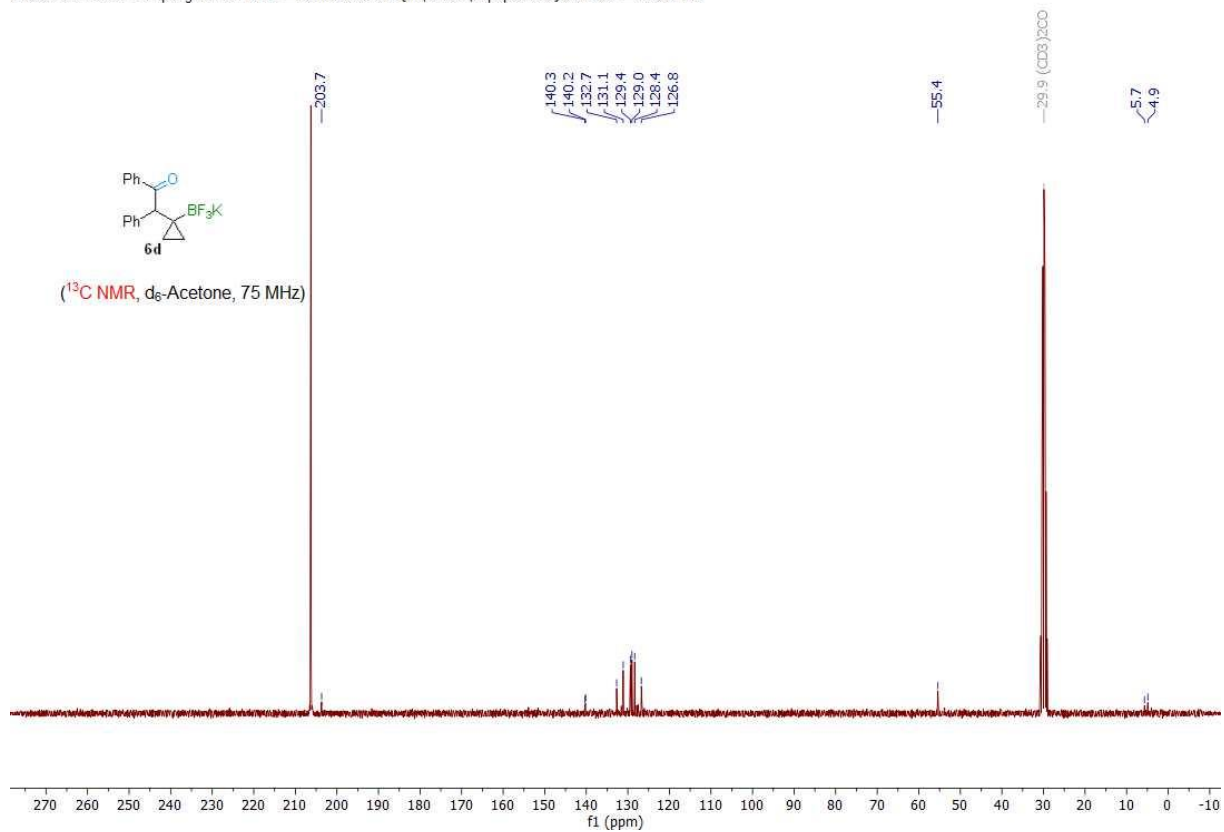

4.3

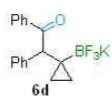

(<sup>11</sup>B NMR, d<sub>6</sub>-Acetone, 96 MHz)

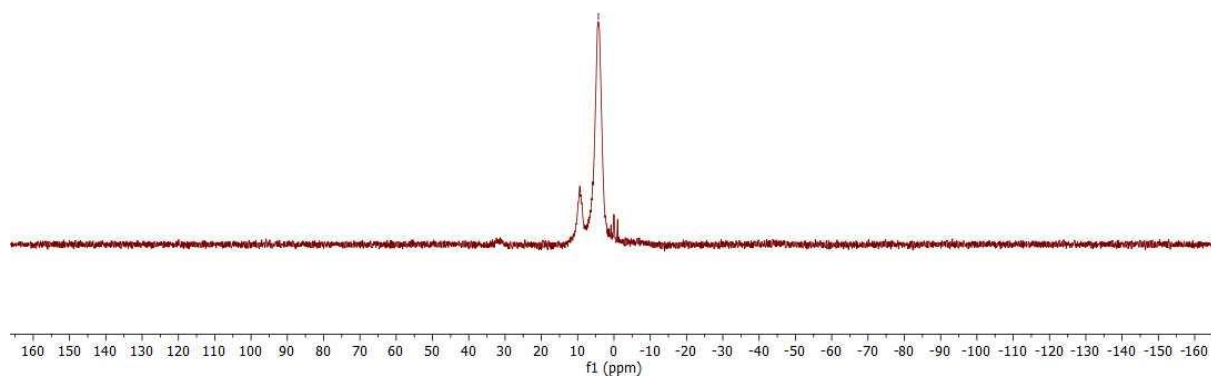

## 8.2 NMR spectra of the BCPs

211027.f357.10.fid — Fupeng Wu u-y-7 — PROTON CDCl<sub>3</sub> {C:\Bruker\TopSpin3.6.2} 2110 57 — 300.20MHz

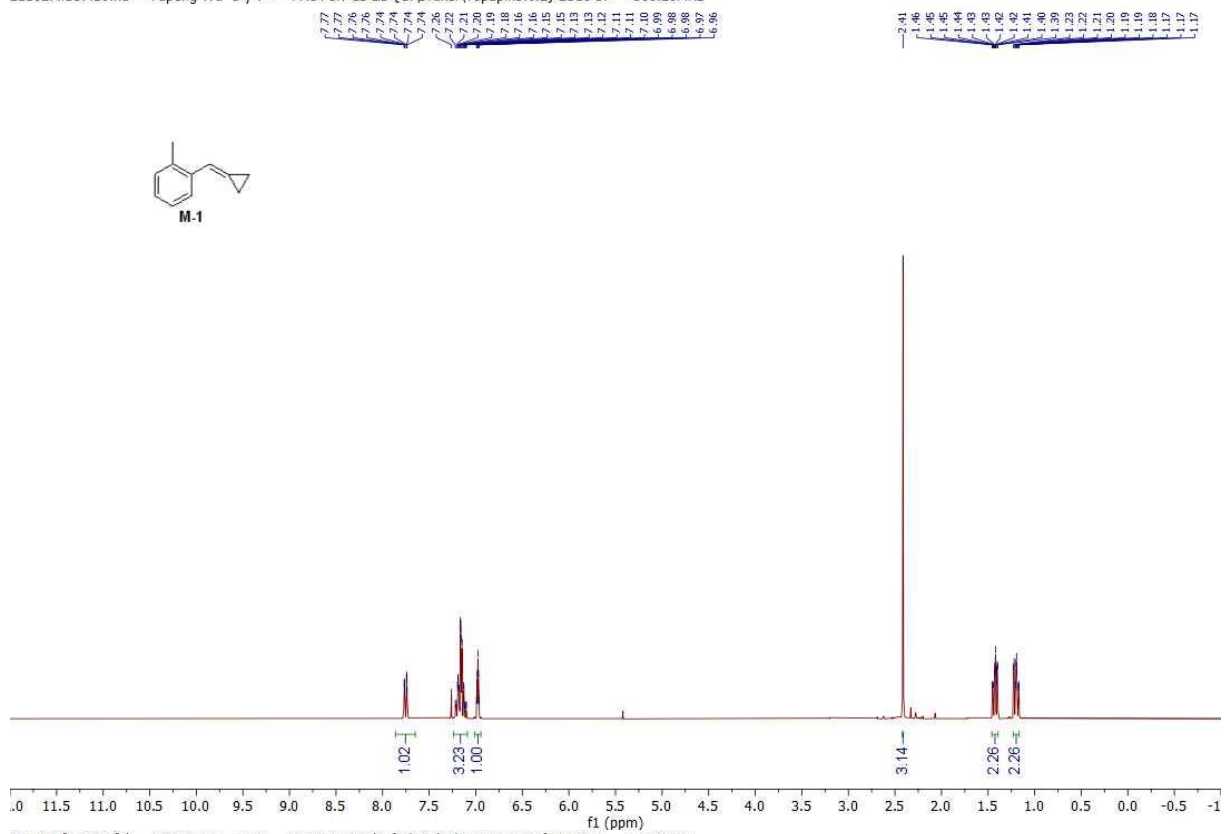

211027.f357.11.fid — Fupeng Wu u-y-7 — C13CPD CDCl<sub>3</sub> {C:\Bruker\TopSpin3.6.2} 2110 57 — 75.49MHz

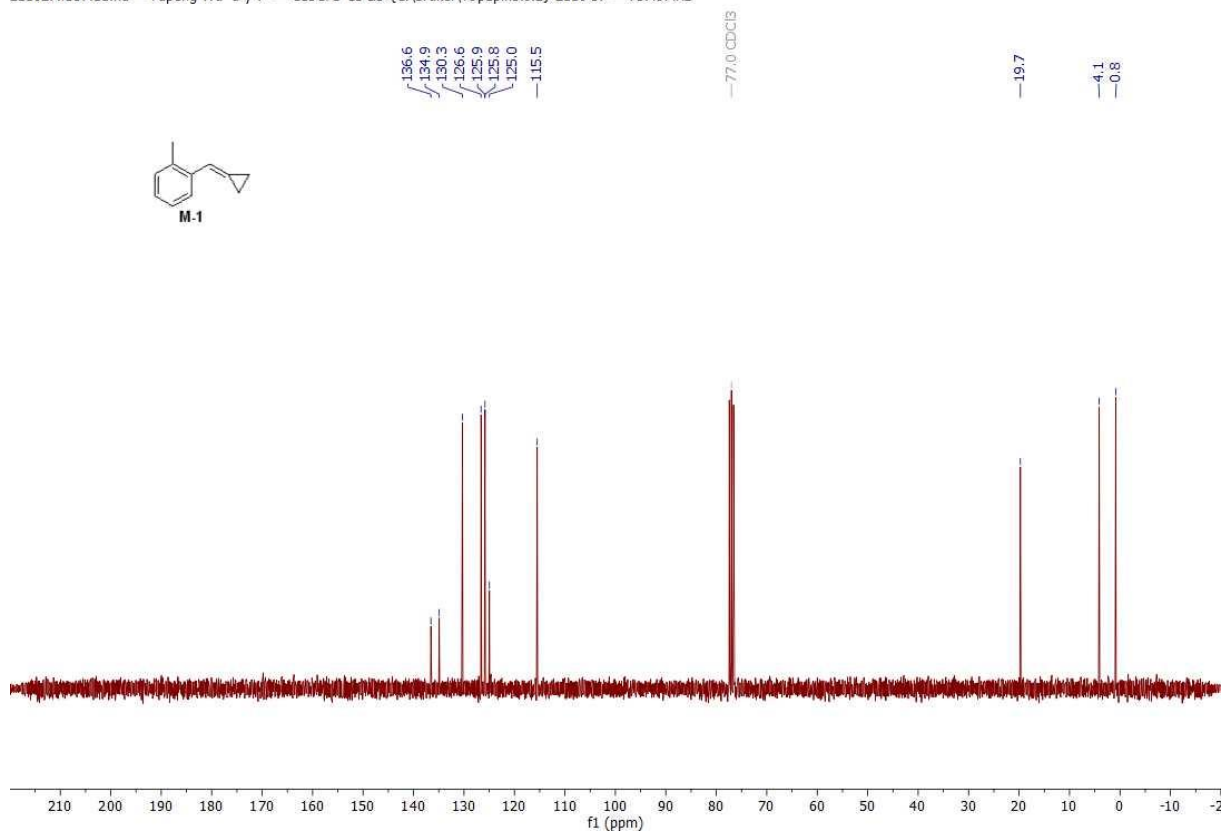

211029.326.10.fid — Fupeng Wu u-y-12 — Au1H CDCl3 {C:\Bruker\TopSpin3.6.2} 2110 26 — 300.13MHz

7.32  
7.30  
7.29  
7.28  
7.20  
7.20  
7.19  
7.15  
7.15  
7.00  
6.99  
6.97  
6.97  
6.88  
6.88  
6.67  
6.66

2.32  
1.40  
1.38  
1.37  
1.36  
1.35  
1.15  
1.14  
1.13  
1.12  
1.10

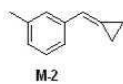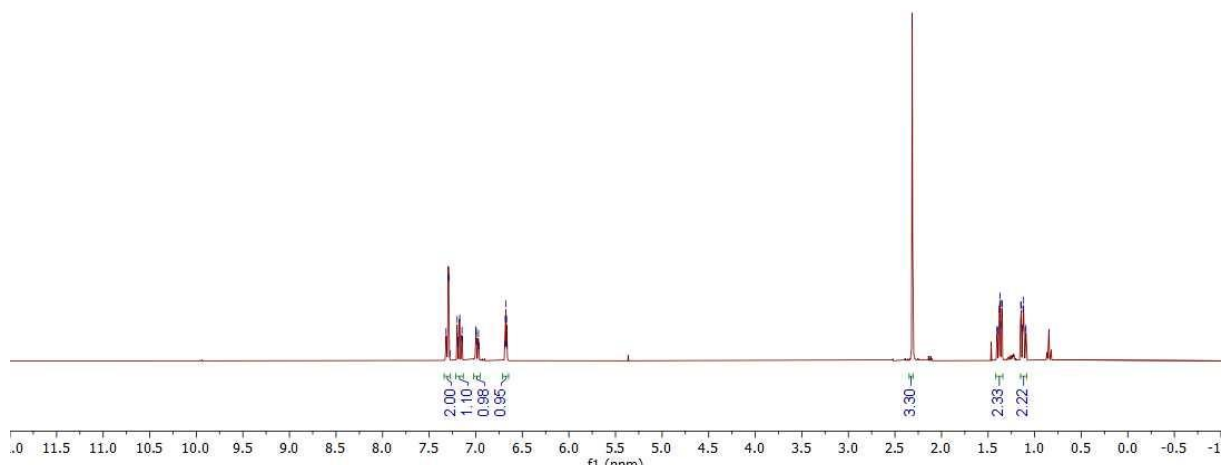

211029.326.11.fid — Fupeng Wu u-y-12 — Au13C CDCl3 {C:\Bruker\TopSpin3.6.2} 2110 26 — 75.48MHz

138.2  
137.9  
128.3  
127.5  
127.3  
124.0  
123.7  
118.3

-77.0 CDCl3

-21.5

-4.2  
-0.5

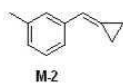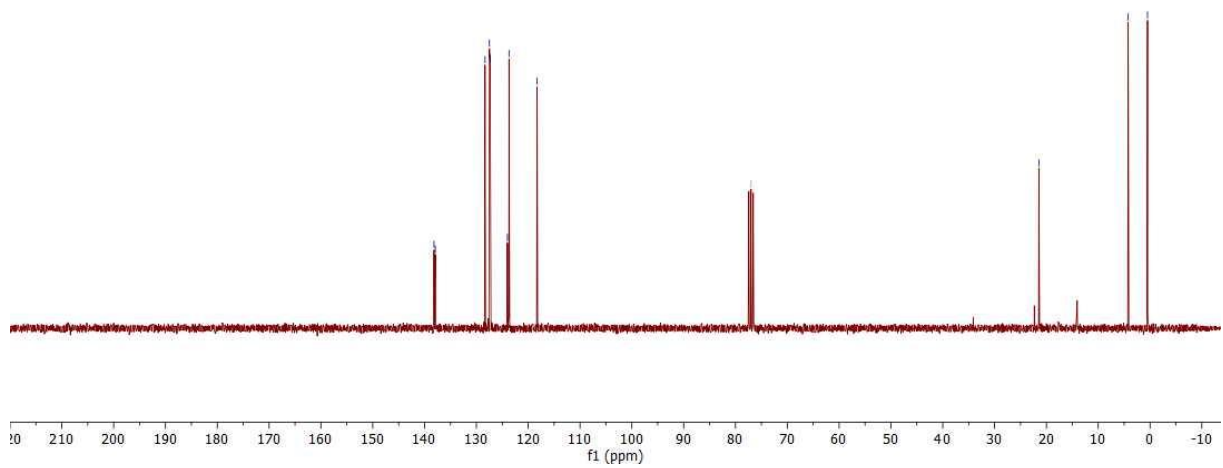

211027.f360.10.fid — Fupeng Wu u-y-6 — PROTON CDCl3 {C:\Bruker\TopSpin3.6.2} 2110 60 — 300.20MHz

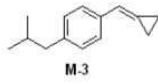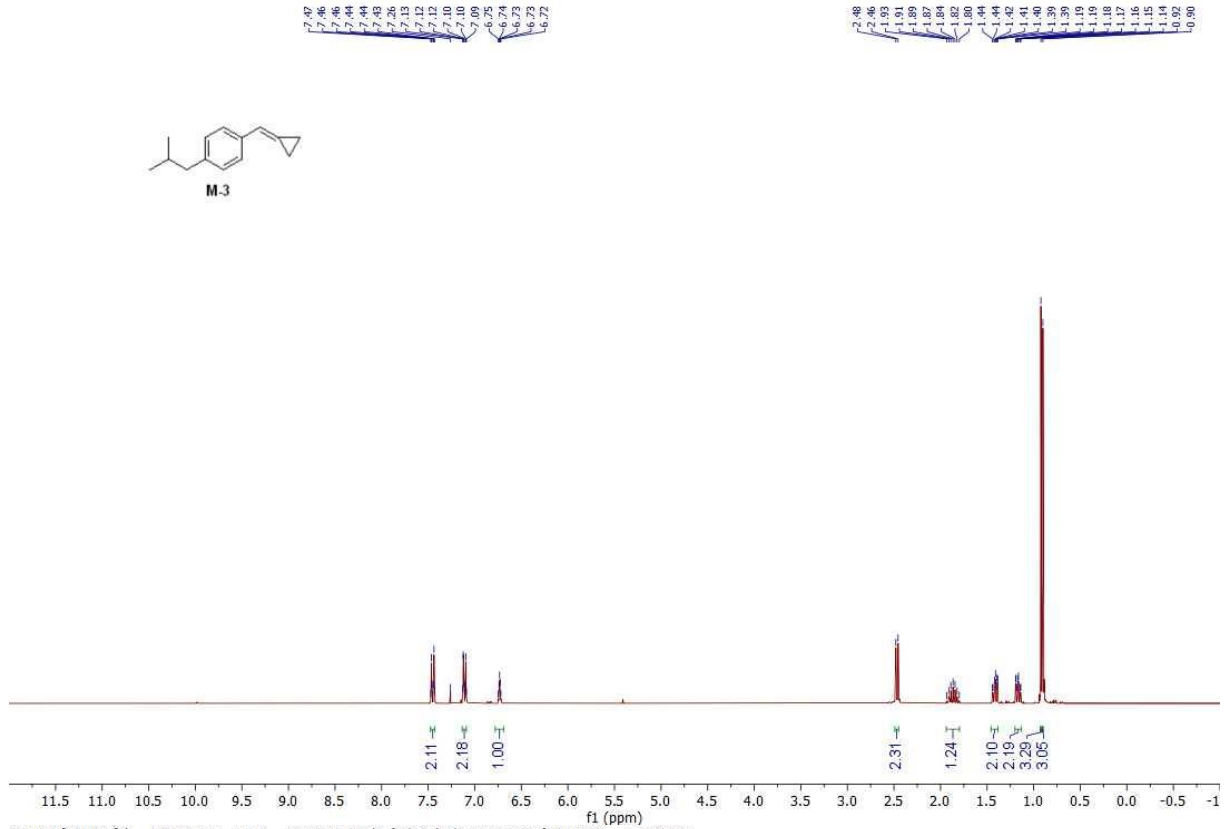

211027.f360.11.fid — Fupeng Wu u-y-6 — C13CPD CDCl3 {C:\Bruker\TopSpin3.6.2} 2110 60 — 75.49MHz

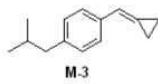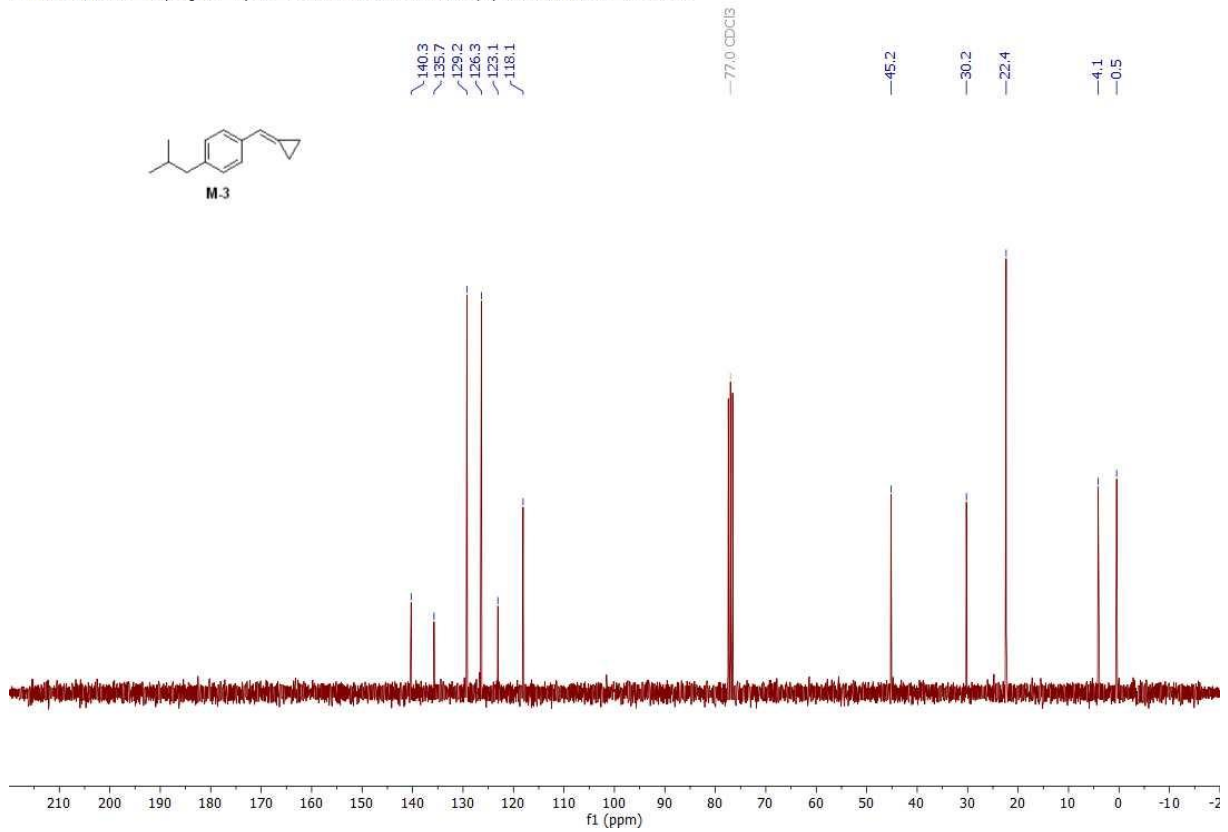

211105.435.10.fid — Fupeng Wu U-y-20 — Au1H CDCl3 {C:\Bruker\TopSpin3.5pl6} 2111 35 — 400.13MHz

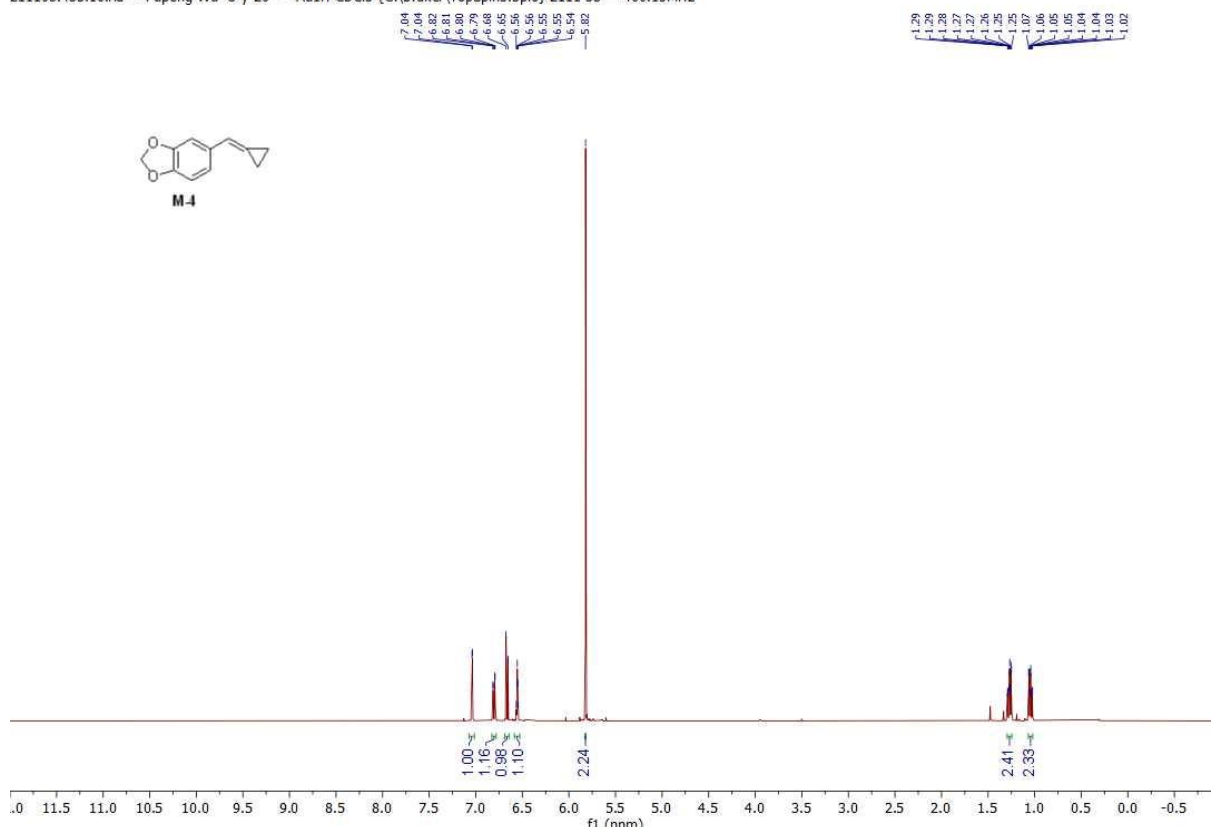

211105.435.11.fid — Fupeng Wu U-y-20 — Au13C CDCl3 {C:\Bruker\TopSpin3.5pl6} 2111 35 — 100.63MHz

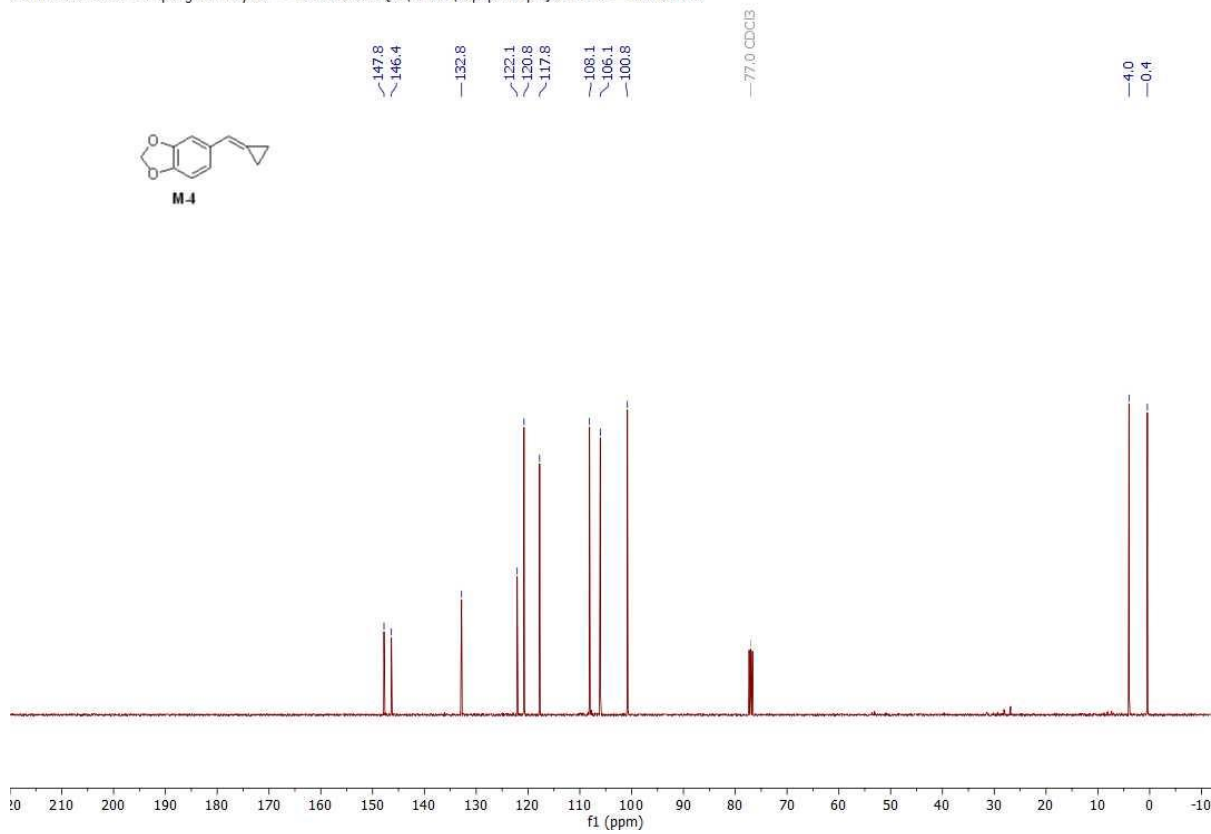



211126.f360.10.fid — Fupeng Wu U-y-2 — PROTON CDCl<sub>3</sub> (C:\Bruker\TopSpin3.6.2) 2111 60 — 300.20MHz

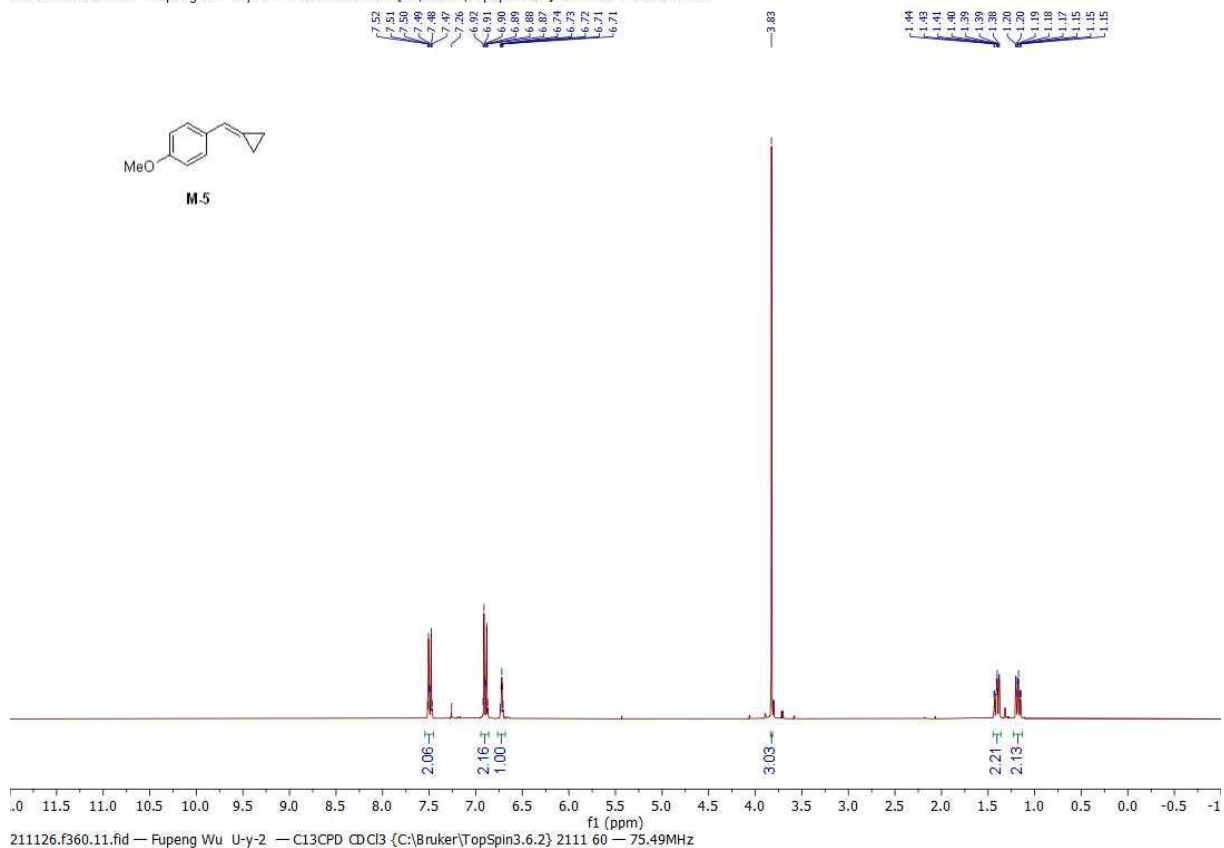

211126.f360.11.fid — Fupeng Wu U-y-2 — C13CPD CDCl<sub>3</sub> (C:\Bruker\TopSpin3.6.2) 2111 60 — 75.49MHz

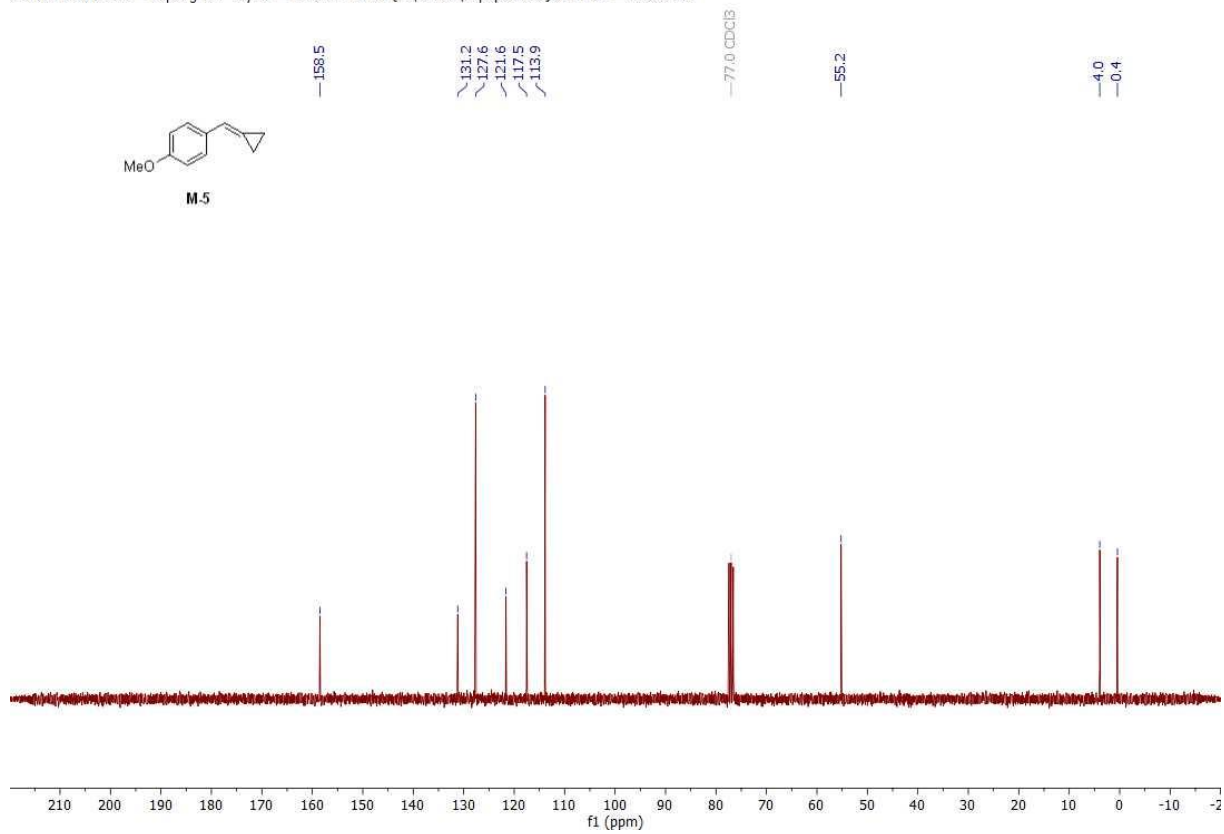

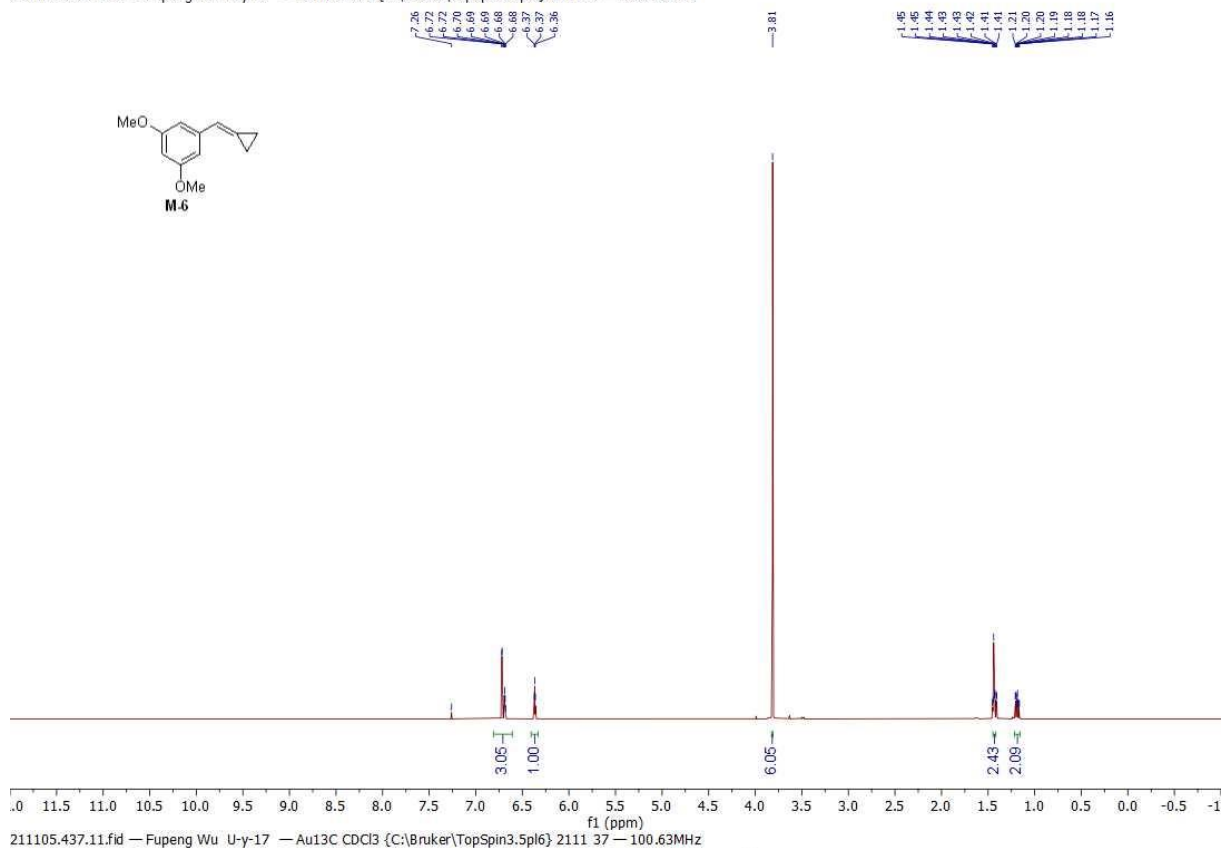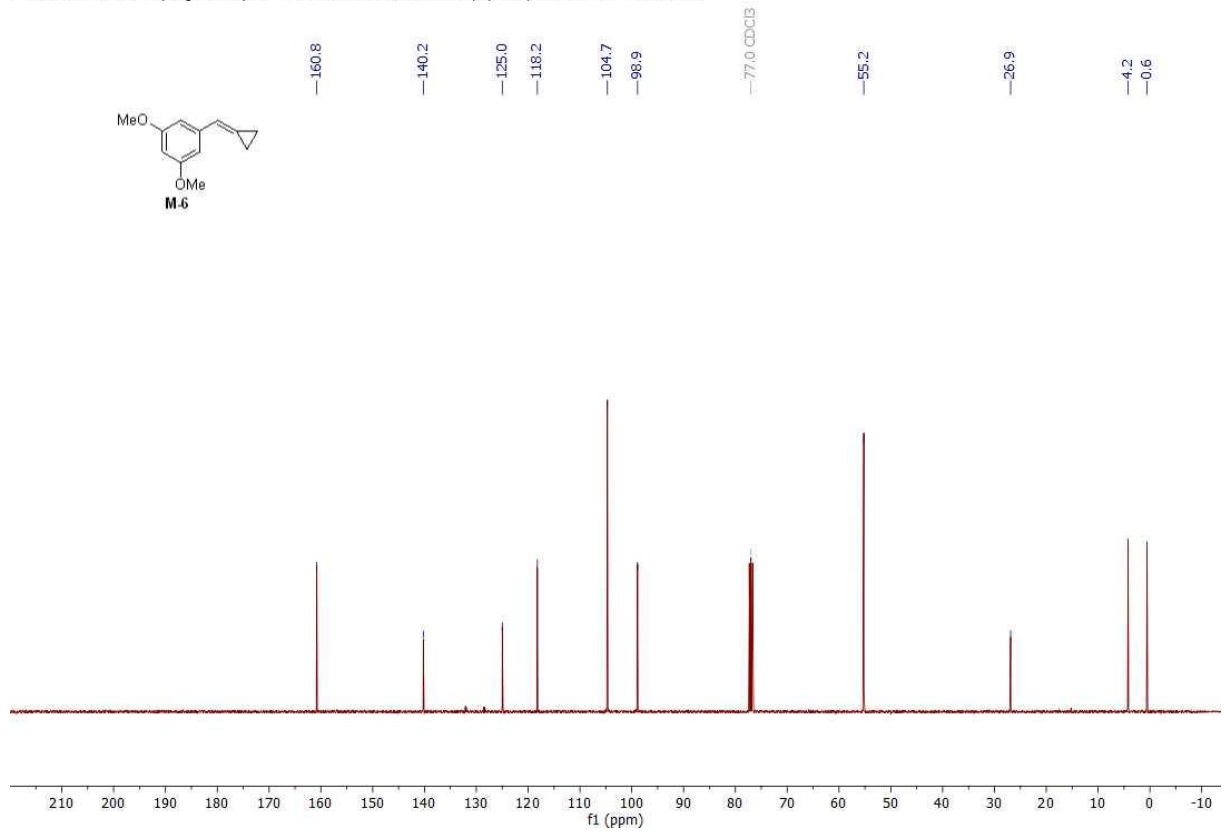

211105.441.10.fid — Fupeng Wu U-y-16 — Au1H CDCl3 {C:\Bruker\TopSpin3.5pl6} 2111 41 — 400.13MHz

7.81  
7.81  
7.79  
7.77  
7.73  
7.72  
7.71  
7.70  
7.70  
7.70  
7.26  
7.14  
7.14  
7.12  
6.90  
6.89  
6.88  
6.88

—3.92

1.53  
1.52  
1.51  
1.51  
1.50  
1.49  
1.48  
1.24  
1.23  
1.22  
1.20

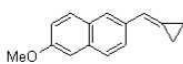

M-7

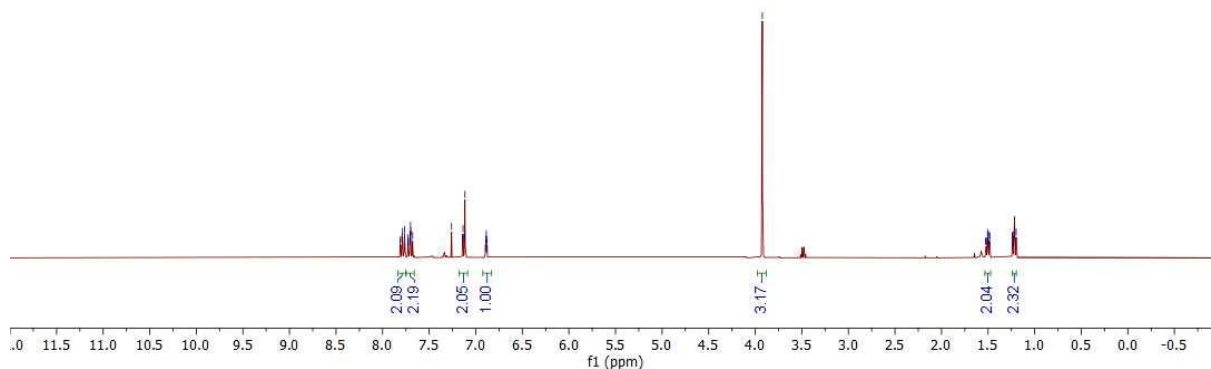

211105.441.11.fid — Fupeng Wu U-y-16 — Au13C CDCl3 {C:\Bruker\TopSpin3.5pl6} 2111 41 — 100.63MHz

—1574

1338  
1336  
1294  
1291  
1268  
1256  
1250  
1237  
1188  
1184  
—1058

—77.0 CDCl3

—55.3

—4.3  
—0.6

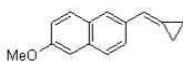

M-7

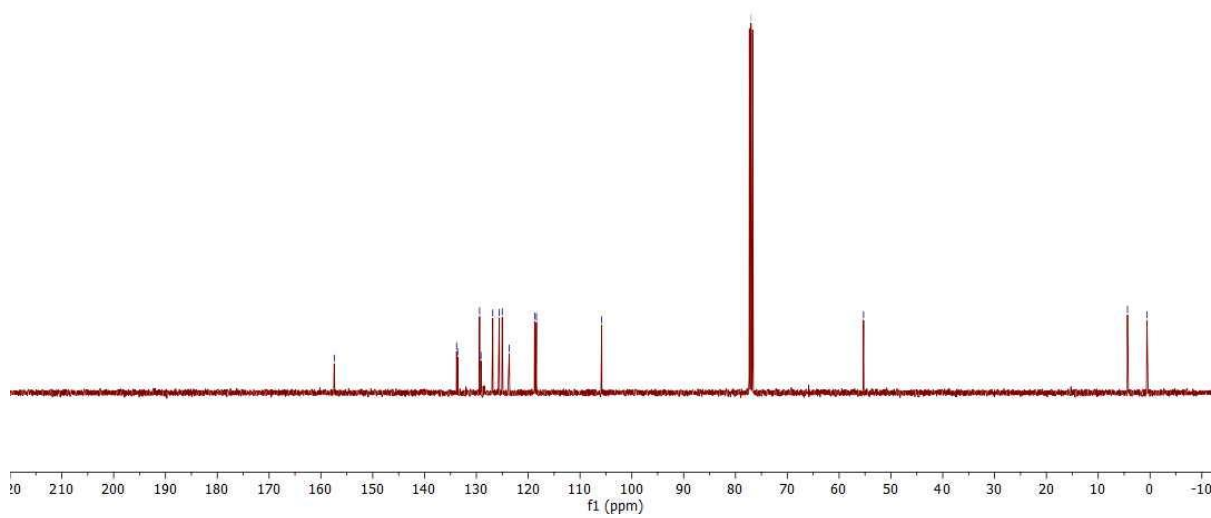

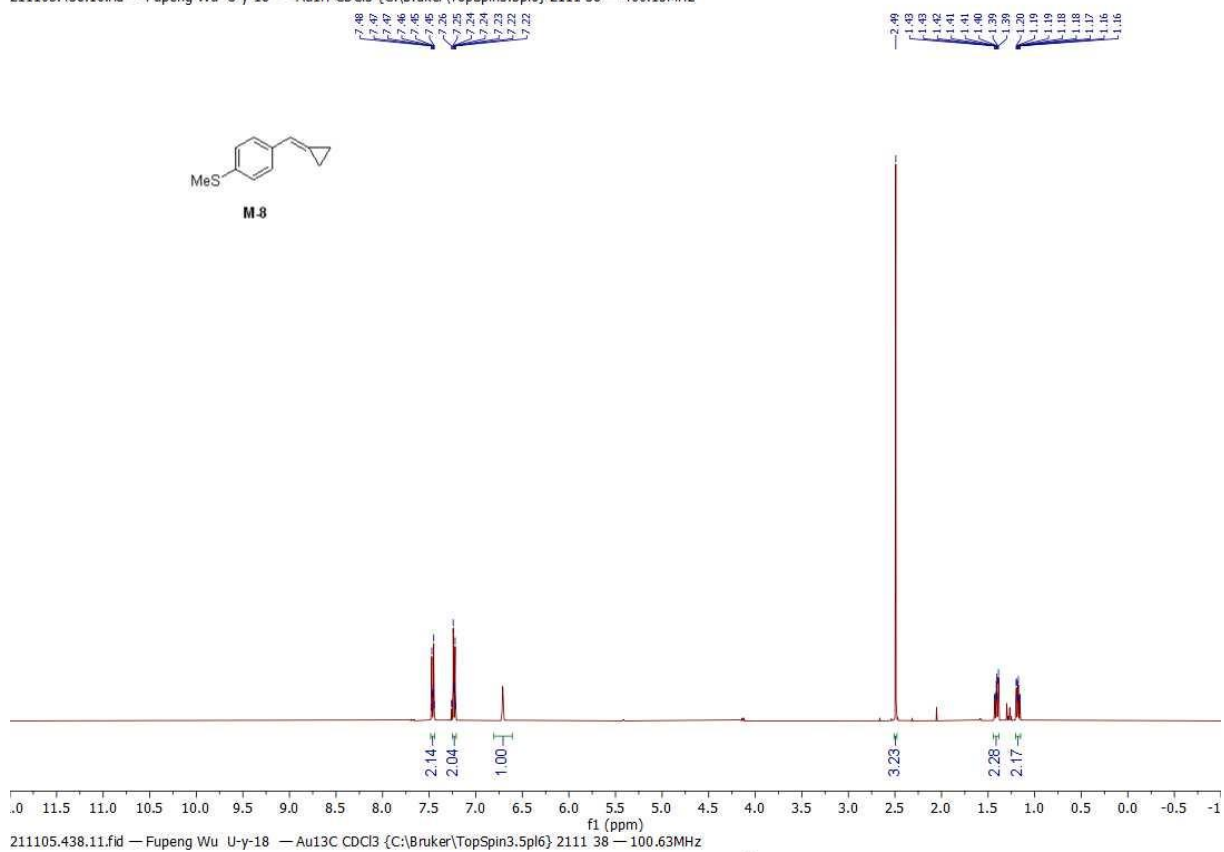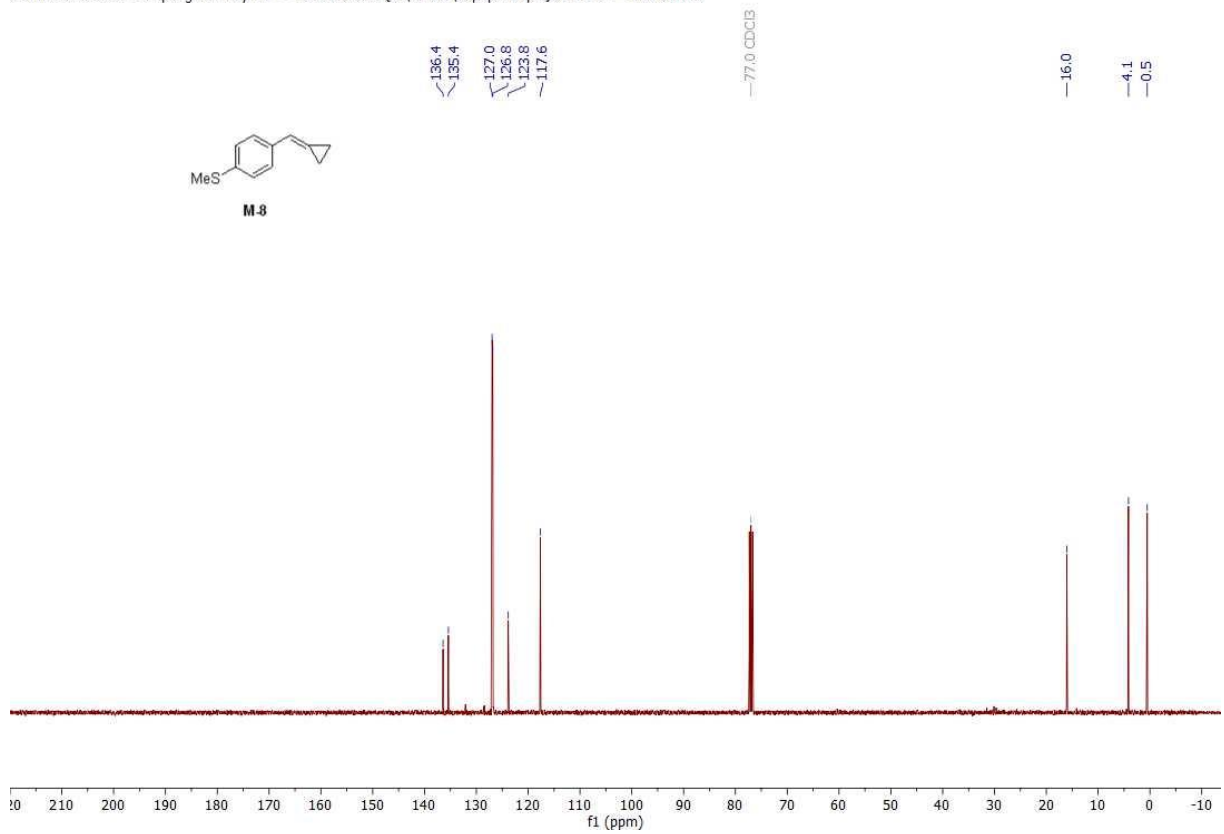

211029.324.10.fid — Fupeng Wu u-y-10 — Au1H CDCl3 {C:\Bruker\TopSpin3.6.2} 2110 24 — 300.13MHz

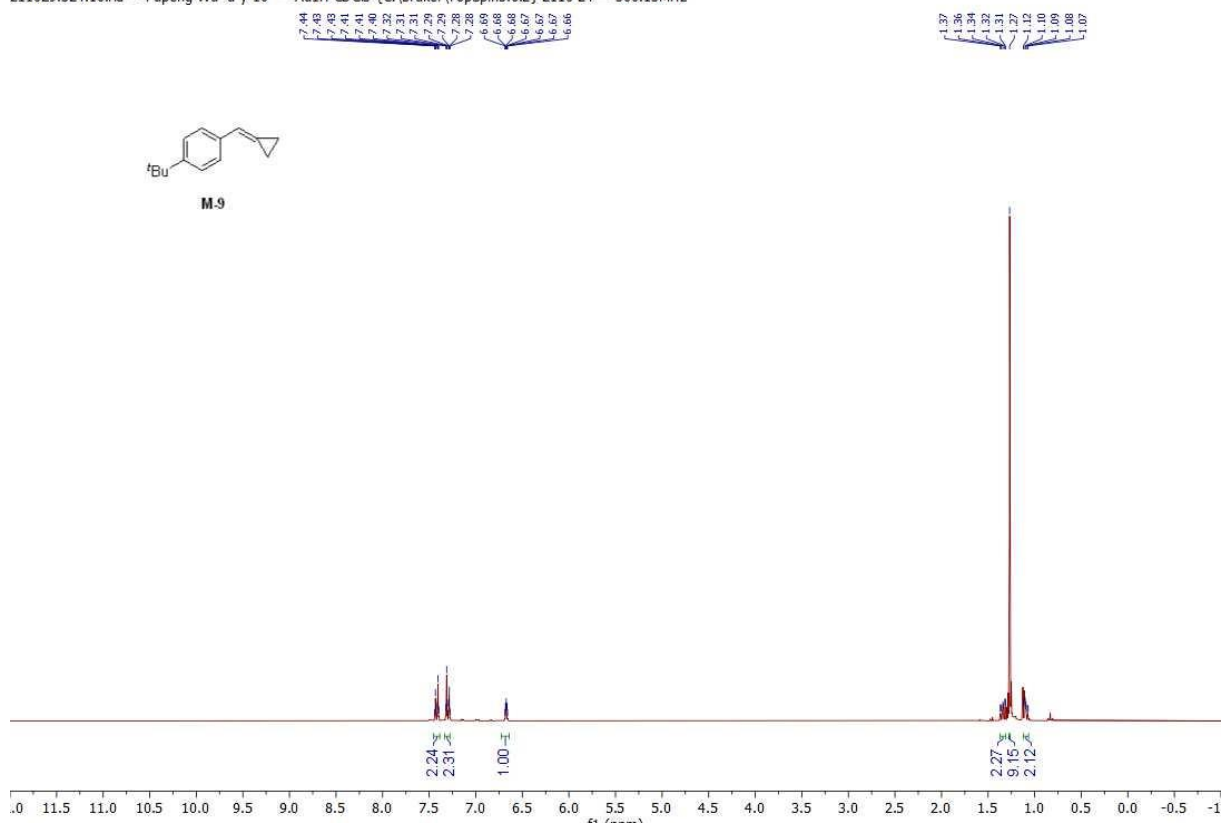

211029.324.11.fid — Fupeng Wu u-y-10 — Au13C CDCl3 {C:\Bruker\TopSpin3.6.2} 2110 24 — 75.48MHz

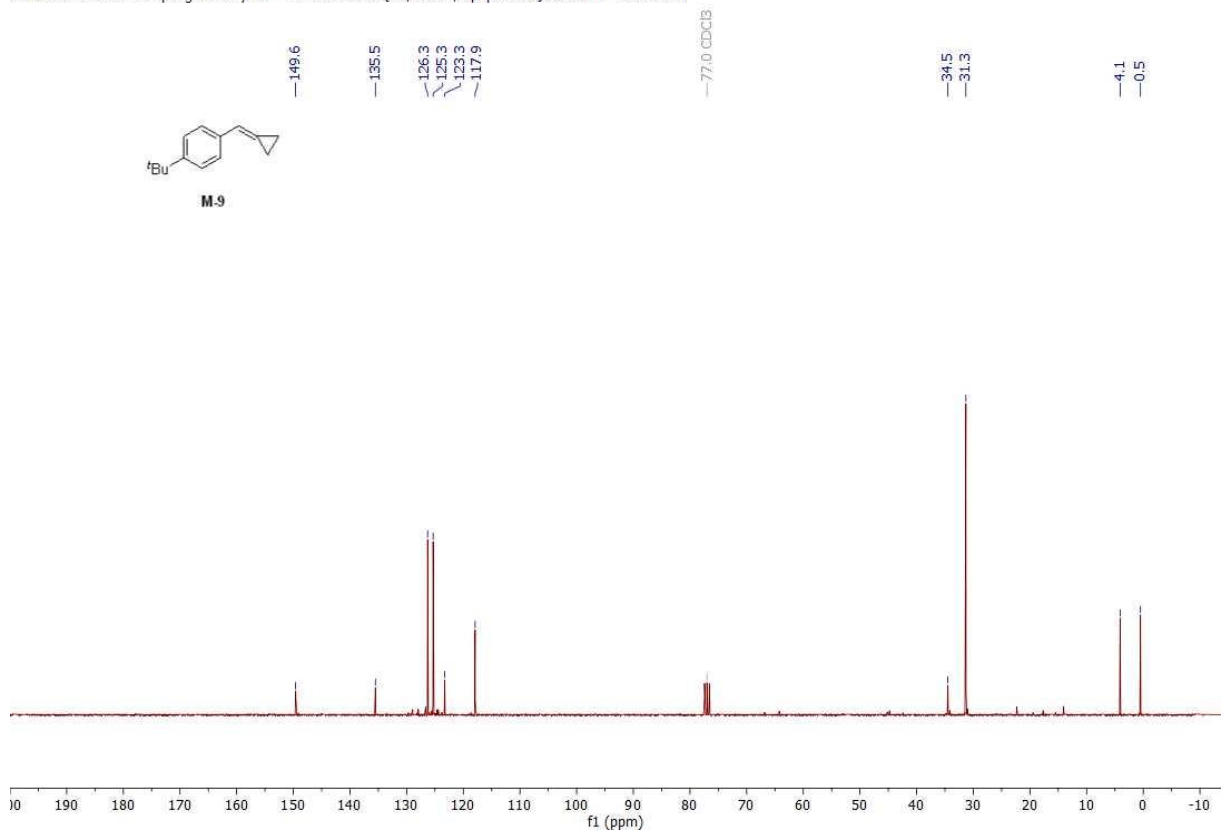

211027.f358.10.fid — Fupeng Wu u-y-4 — PROTON CDCl3 {C:\Bruker\TopSpin3.6.2} 2110 58 — 300.20MHz

8.26  
8.26  
8.23  
8.23  
7.90  
7.89  
7.88  
7.87  
7.87  
7.86  
7.86  
7.85  
7.78  
7.78  
7.75  
7.75  
7.56  
7.55  
7.54  
7.54  
7.53  
7.51  
7.49  
7.48  
7.48  
7.47  
7.46  
7.46

1.51  
1.50  
1.50  
1.48  
1.48  
1.47  
1.46  
1.46  
1.44  
1.33  
1.32  
1.31  
1.31  
1.29  
1.28  
1.27

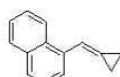

M-10

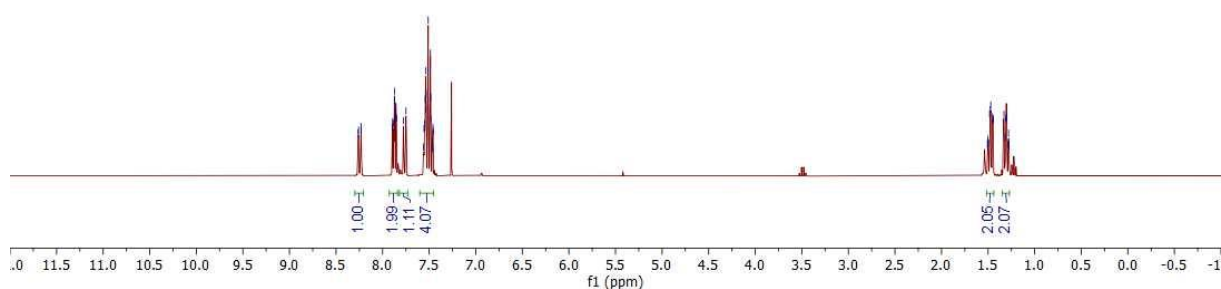

211027.f358.11.fid — Fupeng Wu u-y-4 — C13CPD CDCl3 {C:\Bruker\TopSpin3.6.2} 2110 58 — 75.49MHz

134.6  
133.8  
131.0  
128.6  
127.1  
126.7  
125.8  
125.6  
125.5  
123.8  
123.6  
114.7

-77.0 CDCl3

4.1  
1.5

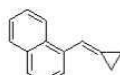

M-10

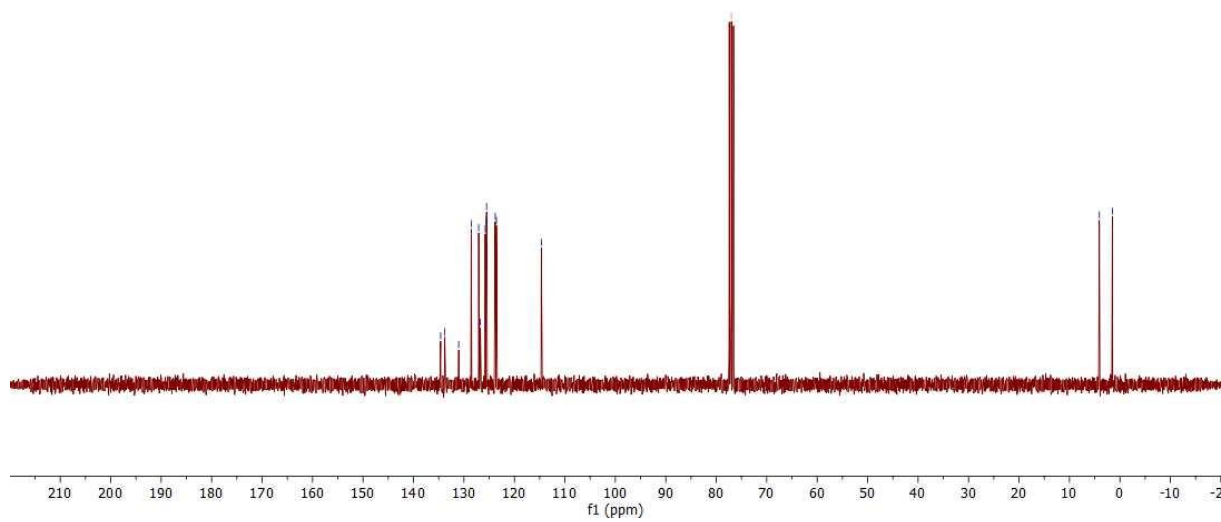

210924.325.10.fid — Wu/ U-Y-3 — Au1H CDCl3 {C:\Bruker\TopSpin3.6.2} 2109 25 — 300.13MHz

7.48  
7.47  
7.46  
7.45  
7.44  
7.43  
7.31  
7.30  
7.29  
7.28  
7.26  
6.72  
6.71  
6.70  
6.69

1.44  
1.43  
1.42  
1.41  
1.41  
1.40  
1.39  
1.38  
1.37  
1.36  
1.35  
1.19  
1.18  
1.18  
1.16  
1.16  
1.15

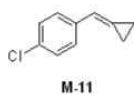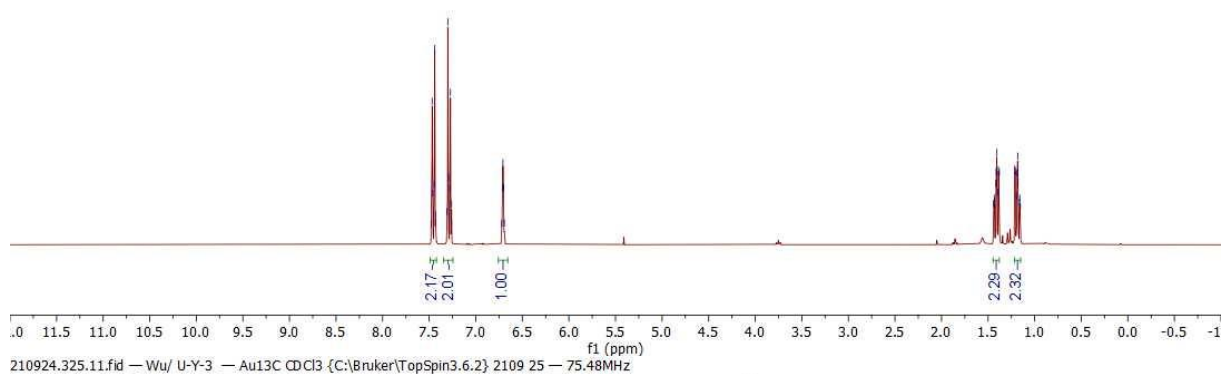

136.7  
132.2  
128.6  
127.7  
125.2  
117.2

77.0 CDCl3

4.1  
0.6

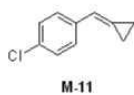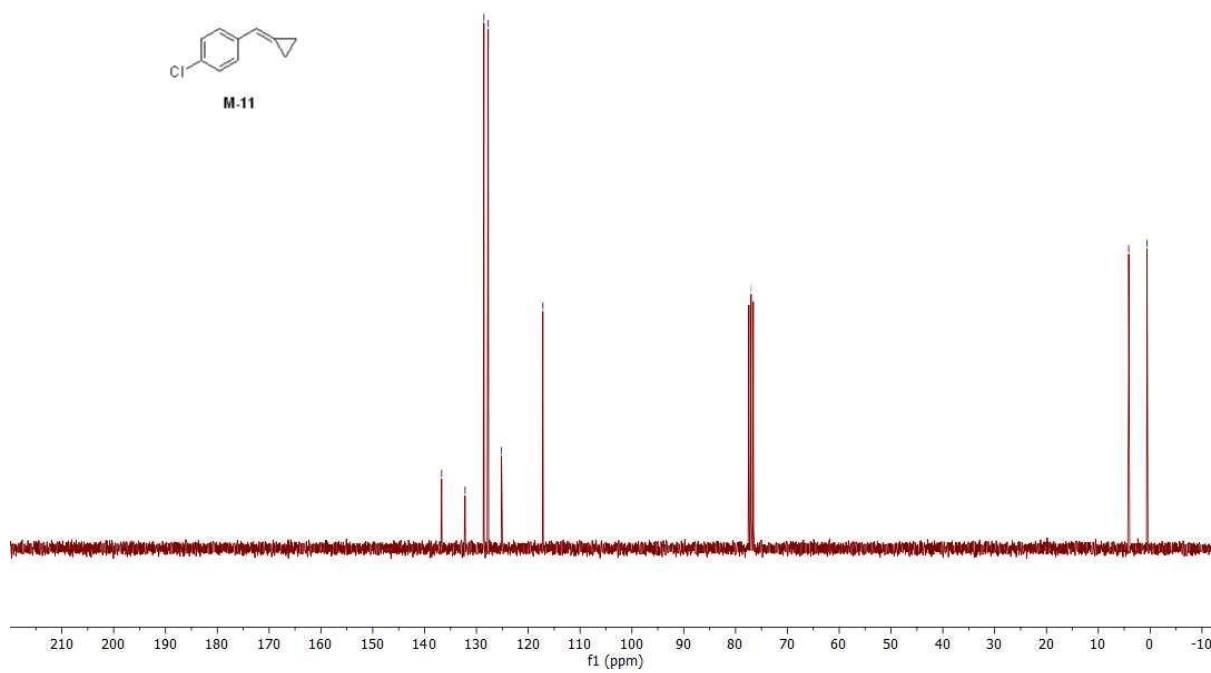

211027.f359.10.fid — Fupeng Wu u-y-8 — PROTON CDCl3 {C:\Bruker\TopSpin3.6.2} 2110 59 — 300.20MHz

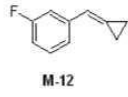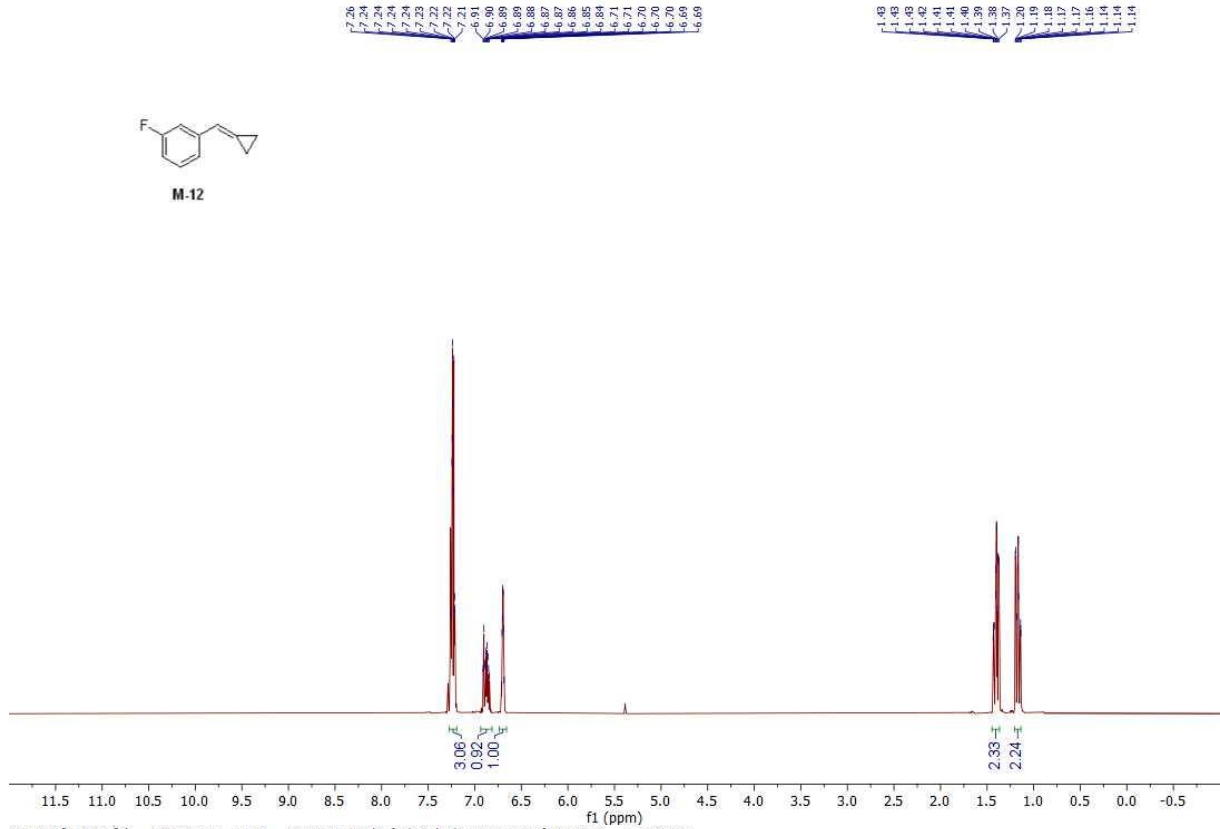

211027.f359.11.fid — Fupeng Wu u-y-8 — C13CPD CDCl3 {C:\Bruker\TopSpin3.6.2} 2110 59 — 75.49MHz

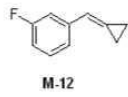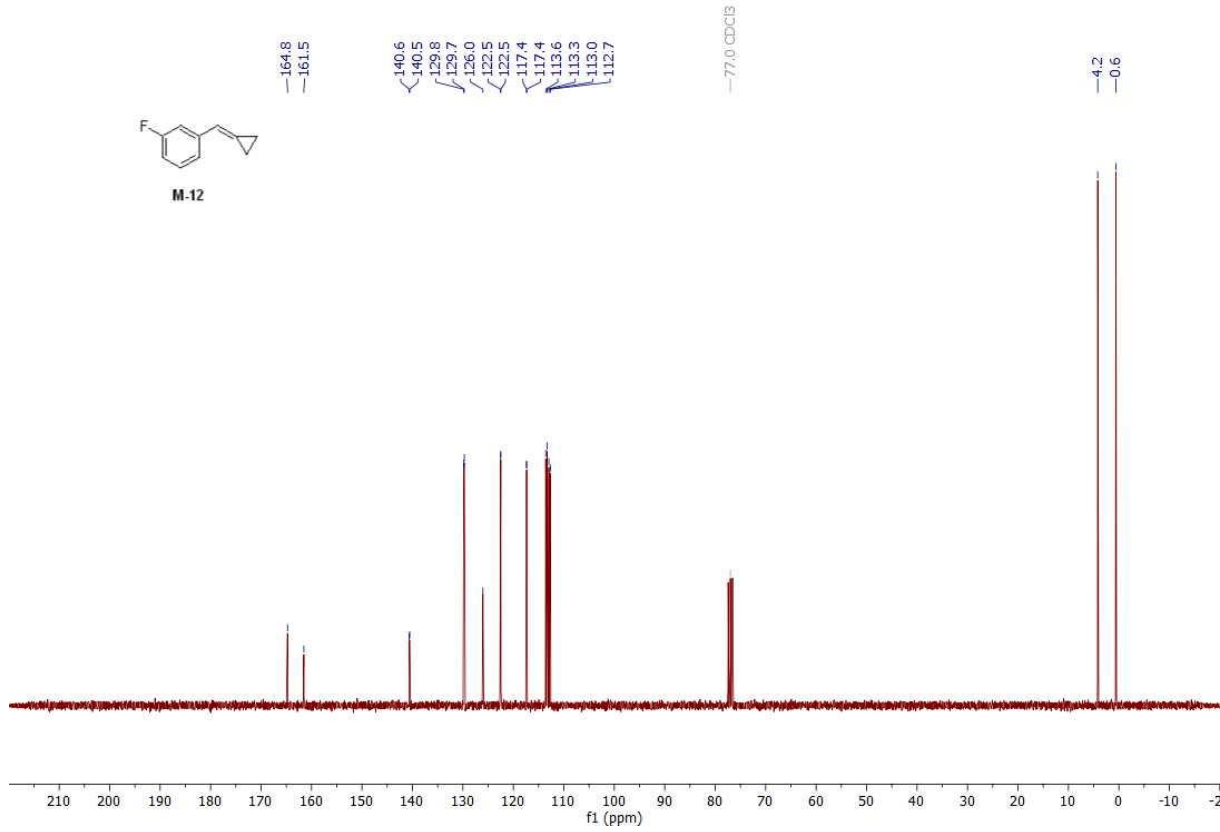



211105.439.10.fid — Fupeng Wu U-y-21 — Au1H CDCl3 {C:\Bruker\TopSpin3.5pl6} 2111 39 — 400.13MHz

7.96  
7.94  
7.94  
7.85  
7.85  
7.85  
7.83  
7.83  
7.83  
7.51  
7.40  
7.38  
7.36  
7.36  
7.34  
7.34  
7.33  
7.32  
7.31  
7.02  
7.02  
7.06  
7.06  
7.05

1.39  
1.38  
1.38  
1.37  
1.37  
1.36  
1.36  
1.36  
1.28  
1.28  
1.27  
1.27  
1.26  
1.26  
1.25  
1.24  
1.24

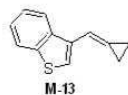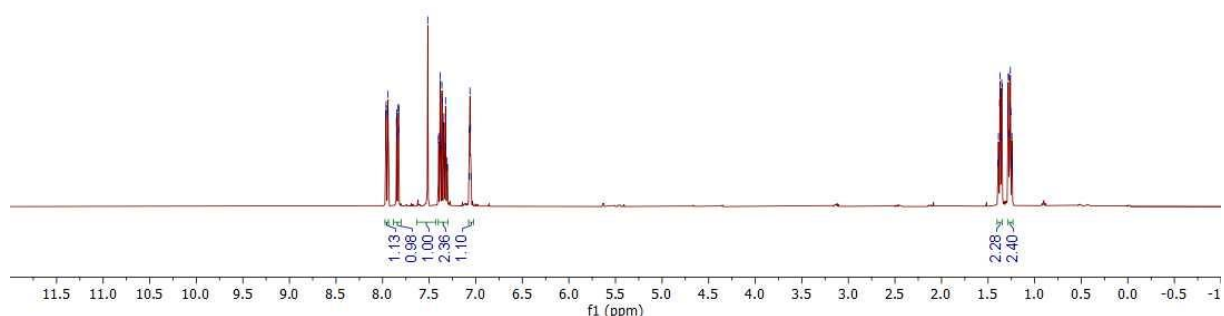

211105.439.11.fid — Fupeng Wu U-y-21 — Au13C CDCl3 {C:\Bruker\TopSpin3.5pl6} 2111 39 — 100.63MHz

140.1  
137.9  
134.0  
125.2  
124.2  
124.0  
122.7  
121.7  
120.8  
110.5

-77.0 CDCl3

-1.2  
-2.0

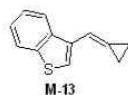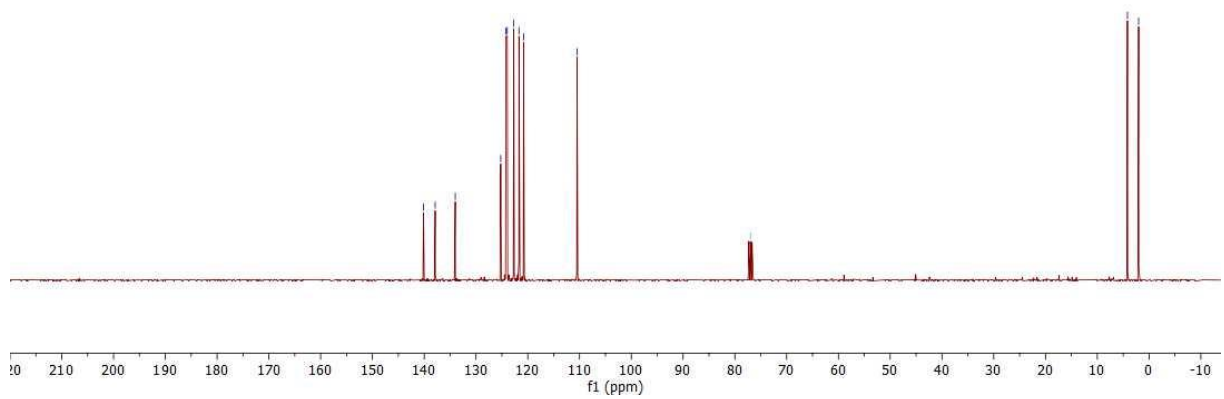

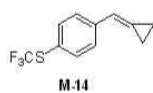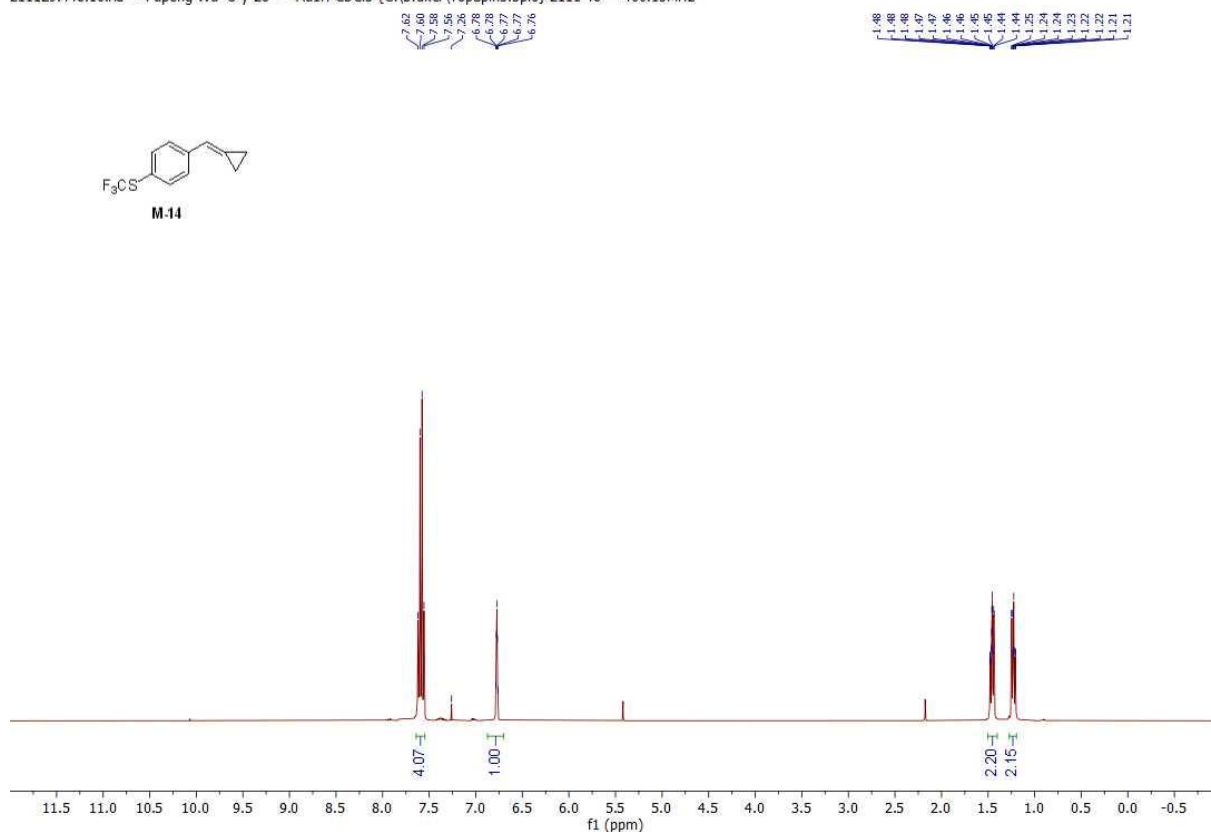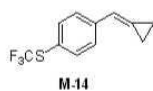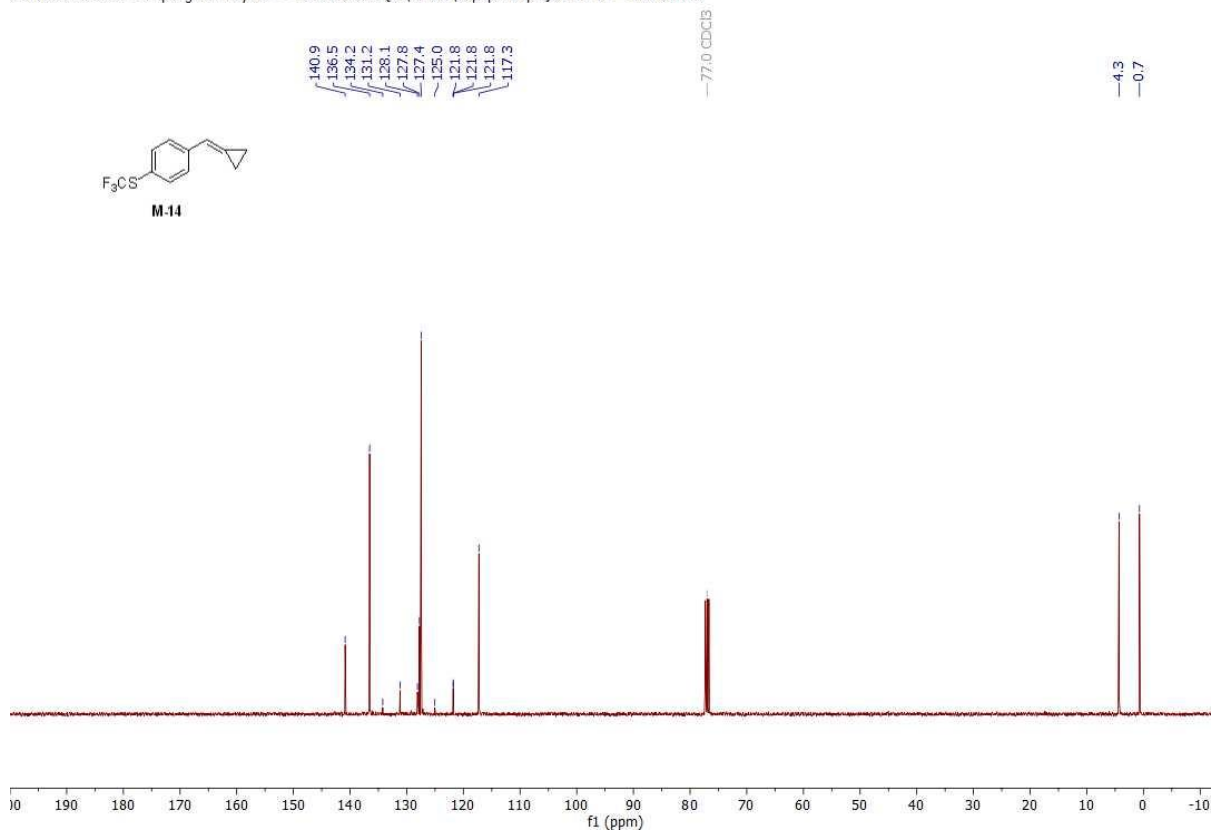

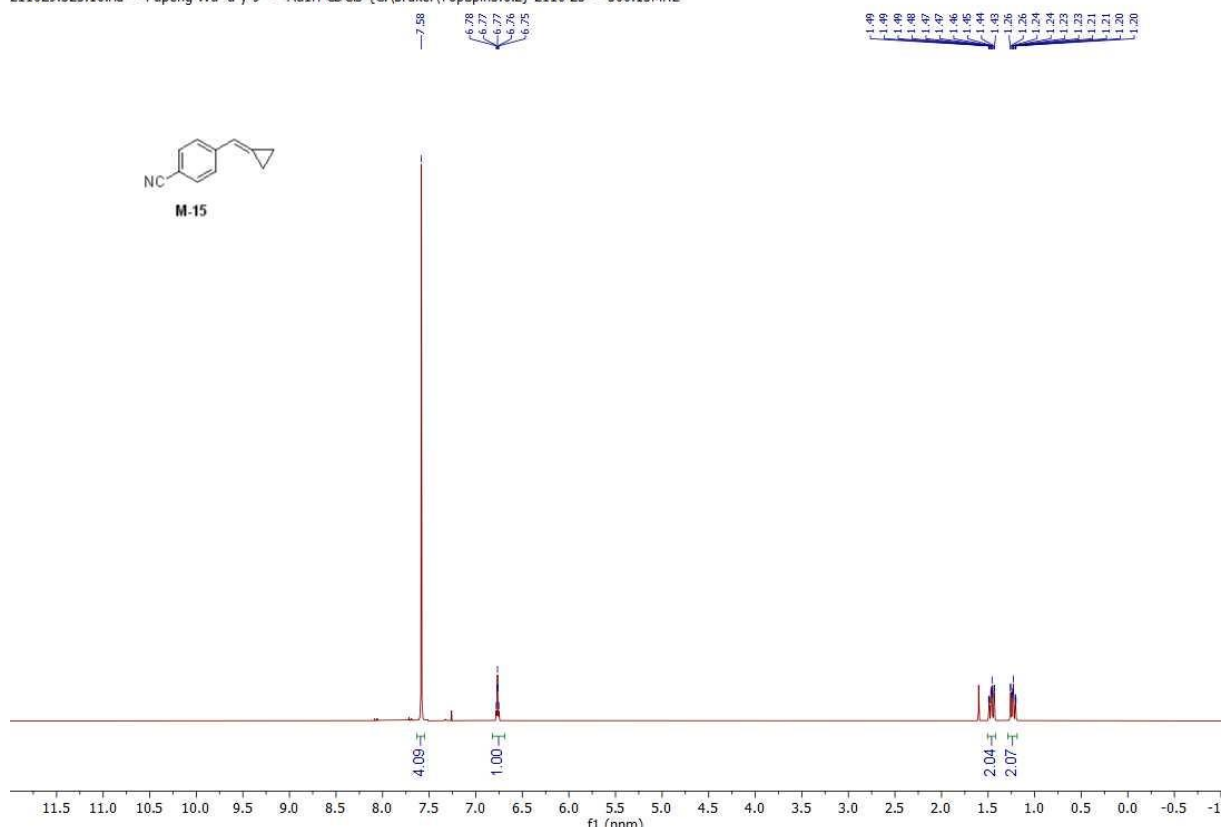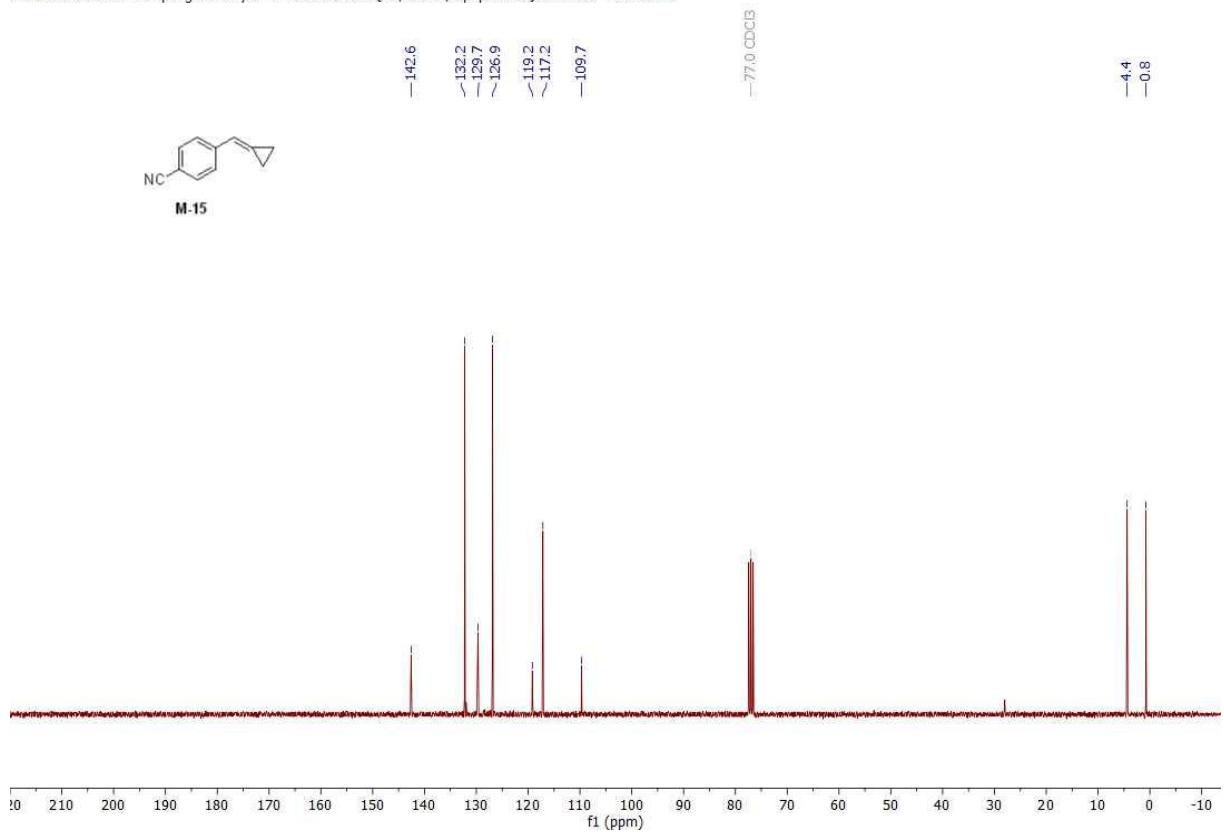

211126.f359.10.fid — Fupeng Wu U-y-24 — PROTON CDCl3 {C:\Bruker\TopSpin3.6.2} 2111 59 — 300.20MHz

7.61  
7.59  
7.58  
7.57  
7.56  
7.19  
7.18  
7.17  
7.17  
7.14  
7.14  
7.13  
7.07  
7.07  
7.06  
7.06

-2.37

1.09  
1.08  
1.08  
1.08

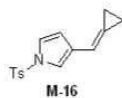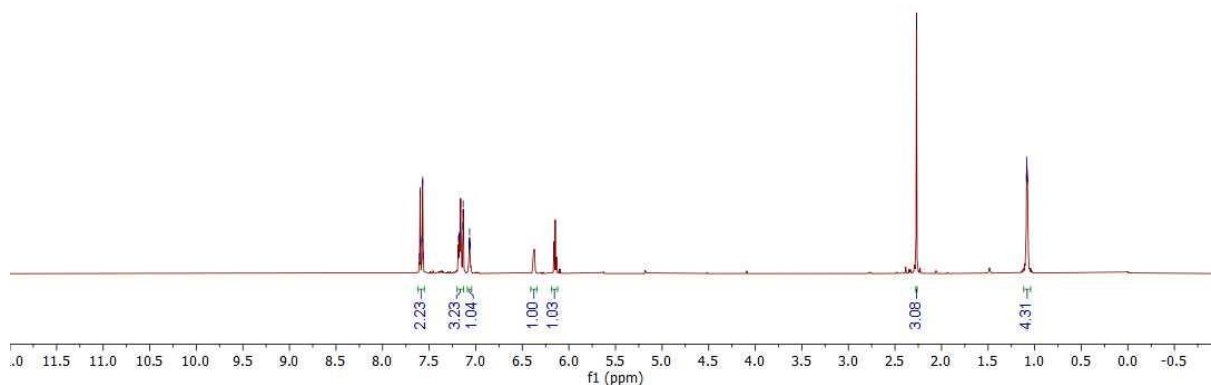

211126.f359.11.fid — Fupeng Wu U-y-24 — C13CPD CDCl3 {C:\Bruker\TopSpin3.6.2} 2111 59 — 75.49MHz

144.8  
136.3  
133.6  
129.9  
126.8  
125.5  
122.0

77.0 CDCl3

21.6

3.5  
2.2

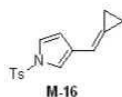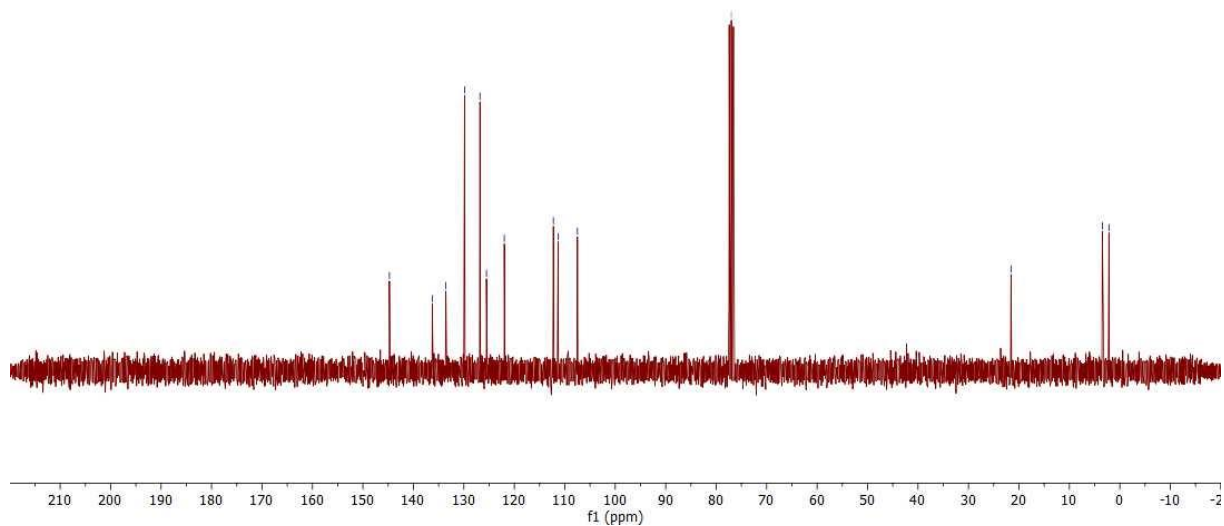

## 9. Crystallographic reports for the x-ray structures

3a

### checkCIF/PLATON report

Structure factors have been supplied for datablock(s) AX2220

THIS REPORT IS FOR GUIDANCE ONLY. IF USED AS PART OF A REVIEW PROCEDURE FOR PUBLICATION, IT SHOULD NOT REPLACE THE EXPERTISE OF AN EXPERIENCED CRYSTALLOGRAPHIC REFEREE.

No syntax errors found.      CIF dictionary      Interpreting this report

### Datablock: AX2220

---

Bond precision:    C-C = 0.0018 A                      Wavelength=0.71073

Cell:                      a=12.4943(10)              b=9.9586(7)              c=16.7620(13)  
                                    alpha=90                      beta=95.6616(15)              gamma=90

Temperature:              150 K

|                        | Calculated   | Reported     |
|------------------------|--------------|--------------|
| Volume                 | 2075.5(3)    | 2075.5(3)    |
| Space group            | P 21/n       | P 21/n       |
| Hall group             | -P 2yn       | -P 2yn       |
| Moiety formula         | C23 H27 B O3 | ?            |
| Sum formula            | C23 H27 B O3 | C23 H27 B O3 |
| Mr                     | 362.26       | 362.25       |
| Dx, g cm <sup>-3</sup> | 1.159        | 1.159        |
| Z                      | 4            | 4            |
| Mu (mm <sup>-1</sup> ) | 0.074        | 0.074        |
| F000                   | 776.0        | 776.0        |
| F000'                  | 776.34       |              |
| h, k, lmax             | 17, 13, 23   | 17, 13, 22   |
| Nref                   | 5612         | 5596         |
| Tmin, Tmax             | 0.981, 0.994 | 0.960, 0.990 |
| Tmin'                  | 0.964        |              |

Correction method= # Reported T Limits: Tmin=0.960 Tmax=0.990  
AbsCorr = MULTI-SCAN

Data completeness= 0.997                      Theta(max)= 29.204

R(reflections)= 0.0452( 4098)                      wR2(reflections)=  
S = 1.032                                              Npar= 248                                              0.1209( 5596)

The following ALERTS were generated. Each ALERT has the format  
**test-name\_ALERT\_alert-type\_alert-level.**  
Click on the hyperlinks for more details of the test.

**Alert level G**

|                   |                                                  |              |
|-------------------|--------------------------------------------------|--------------|
| PLAT066_ALERT_1_G | Predicted and Reported Tmin&Tmax Range Identical | ? Check      |
| PLAT395_ALERT_2_G | Deviating X-O-Y Angle From 120 for O2            | 107.1 Degree |
| PLAT395_ALERT_2_G | Deviating X-O-Y Angle From 120 for O3            | 107.2 Degree |
| PLAT883_ALERT_1_G | No Info/Value for _atom_sites_solution_primary . | Please Do !  |
| PLAT912_ALERT_4_G | Missing # of FCF Reflections Above STh/L= 0.600  | 16 Note      |
| PLAT941_ALERT_3_G | Average HKL Measurement Multiplicity .....       | 4.0 Low      |
| PLAT978_ALERT_2_G | Number C-C Bonds with Positive Residual Density. | 21 Info      |

0 **ALERT level A** - Most likely a serious problem - resolve or explain  
0 **ALERT level B** - A potentially serious problem, consider carefully  
0 **ALERT level C** - Check. Ensure it is not caused by an omission or oversight  
7 **ALERT level G** - General information/check it is not something unexpected

2 ALERT type 1 CIF construction/syntax error, inconsistent or missing data  
3 ALERT type 2 Indicator that the structure model may be wrong or deficient  
1 ALERT type 3 Indicator that the structure quality may be low  
1 ALERT type 4 Improvement, methodology, query or suggestion  
0 ALERT type 5 Informative message, check

Datablock AX2220 - ellipsoid plot

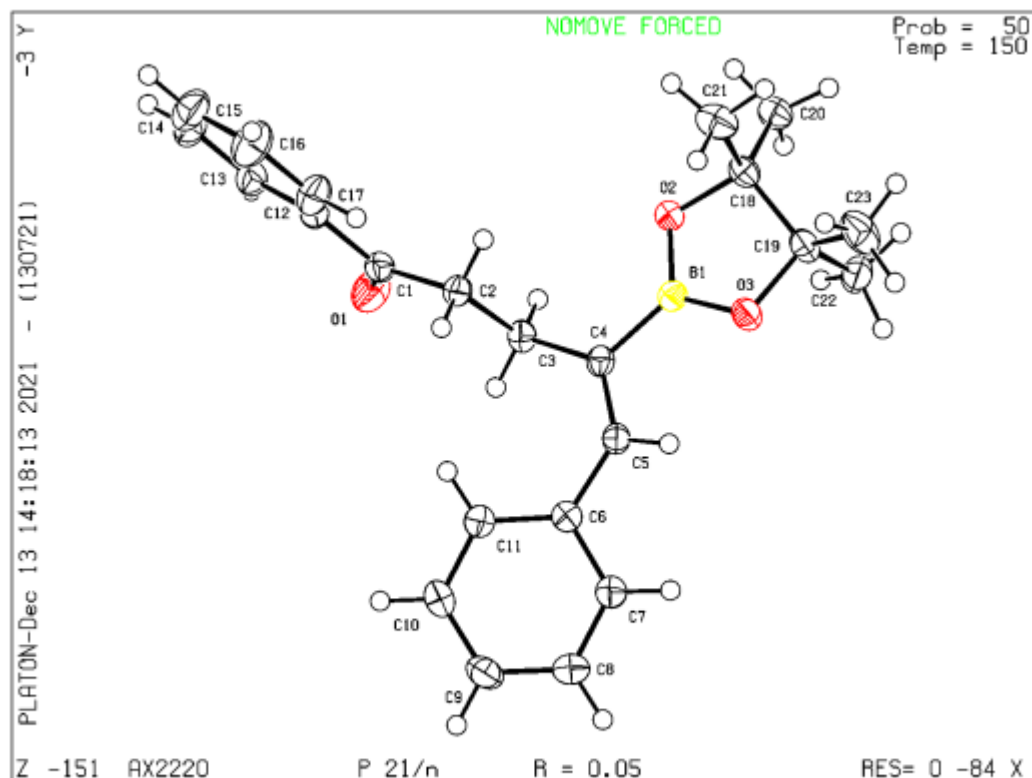



The following ALERTS were generated. Each ALERT has the format  
**test-name\_ALERT\_alert-type\_alert-level.**  
Click on the hyperlinks for more details of the test.

● **Alert level G**

|                   |                                                  |             |        |
|-------------------|--------------------------------------------------|-------------|--------|
| PLAT032_ALERT_4_G | Std. Uncertainty on Flack Parameter Value High . | 0.400       | Report |
| PLAT066_ALERT_1_G | Predicted and Reported Tmin&Tmax Range Identical | ?           | Check  |
| PLAT395_ALERT_2_G | Deviating X-O-Y Angle From 120 for O2            | 105.9       | Degree |
| PLAT395_ALERT_2_G | Deviating X-O-Y Angle From 120 for O3            | 107.0       | Degree |
| PLAT792_ALERT_1_G | Model has Chirality at C2 (Polar SPGR)           | S           | Verify |
| PLAT883_ALERT_1_G | No Info/Value for _atom_sites_solution_primary . | Please Do ! |        |
| PLAT978_ALERT_2_G | Number C-C Bonds with Positive Residual Density. | 13          | Info   |

0 **ALERT level A** - Most likely a serious problem - resolve or explain  
0 **ALERT level B** - A potentially serious problem, consider carefully  
0 **ALERT level C** - Check. Ensure it is not caused by an omission or oversight  
7 **ALERT level G** - General information/check it is not something unexpected

3 ALERT type 1 CIF construction/syntax error, inconsistent or missing data  
3 ALERT type 2 Indicator that the structure model may be wrong or deficient  
0 ALERT type 3 Indicator that the structure quality may be low  
1 ALERT type 4 Improvement, methodology, query or suggestion  
0 ALERT type 5 Informative message, check

Datablock AX2232 - ellipsoid plot

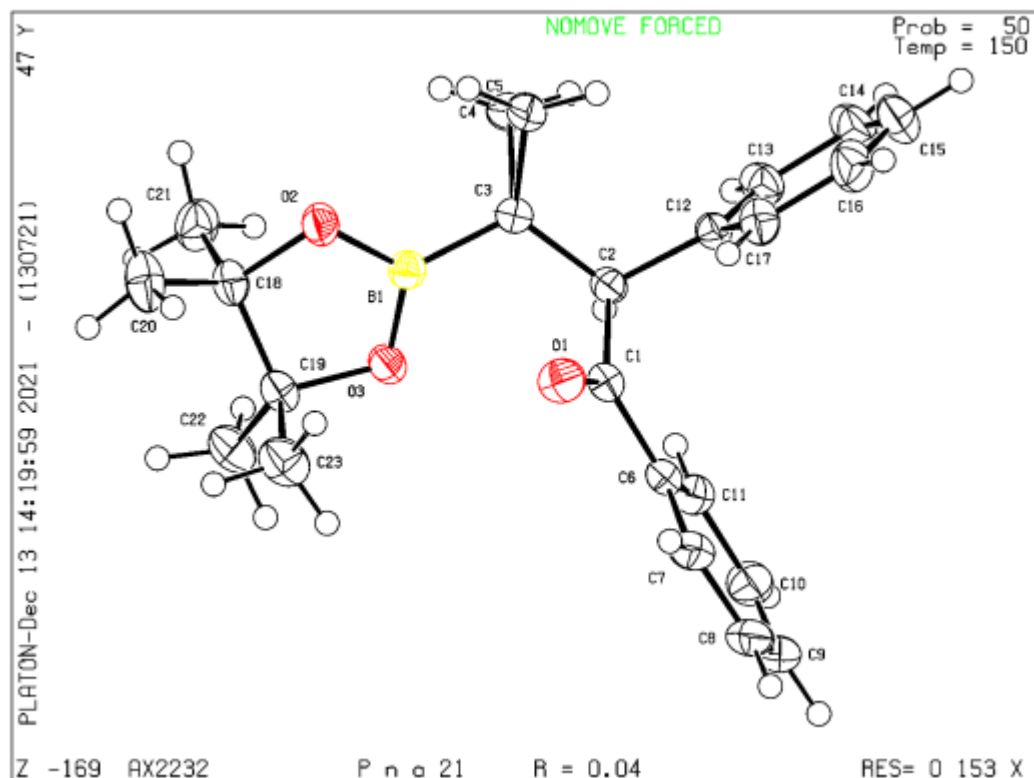

Supplement: d2sc00840h1.pdf [file d2sc00840h1.pdf]
